# Supplementary material for: Comparison of greenness and whiteness of selected mechanochemical and solution-based reactions using a new RGBsynt model
Source: Royal Society of Chemistry journal article supplement (doi:10.1039/d4gc05097e), 2024-12-23
Supplement: d4gc05097e1.xlsx [file d4gc05097e1.xlsx]

## Sheet: Input data
Procedure		R1: Yield (%)	R2: Purity (%)	G1/B1: E-factor	G2: ChlorTox (g)	B2: Time-efficiency (h)	G3/B3: Energy (EED)
O-alkylation - mechanochemistry (Mech. O)
old	Mech. O1	83	99	158.049	40.5252	3.41667	46.2106
old	Mech. O2	65	100	131.434	37.1891	3.41667	46.2106
old	Mech. O3	84	99	129.054	36.0232	3.41667	46.2106
new	Mech. O4	86	99	119.964	25.2923	2.83	42.0565
Average		79.5	99.25	134.625	34.7574	3.27	45.1721
O-alkylation - in-solution (Sol. O)
old	Sol. O1	62	96	499.702	360.039	28.25	138.192
old	Sol. O2	40	96	543.658	367.467	28.25	138.192
old	Sol. O3	65	97	498.803	359.336	28.25	132.877
new	Sol. O4	96	98	100.239	17.8867	10.42	83.9281
Average		65.75	96.75	410.601	276.182	23.7925	123.297
N-alkylation - mechanochemistry (Mech. N)
old	Mech. N1	88	97	138.386	23.7195	2.25	37.5
old	Mech. N2	84	96	152.639	38.6277	4.58	53.5023
old	Mech. N3	81	96	152.839	38.5335	4.58	53.5023
new	Mech. N4	94	99	114.111	51.9251	6.08	61.6441
new	Mech. N5	94	99	190.781	8.25724	4.17	34.715
Average		88.2	97.4	149.751	32.2126	4.332	48.1728
N-alkylation - in-solution (Sol. N)
old	Sol. N1	78	98	728.575	352.215	8.17	74.3164
old	Sol. N2	70	97	717.332	345.537	28.17	137.996
old	Sol. N3	77	95	716.422	344.877	28.17	137.996
new	Sol. N4	54	99	495.793	287.837	52.17	187.795
new	Sol. N5	77	100	84.552	51.4541	16.75	106.41
Average		71.2	97.8	548.535	276.384	26.686	128.903
Nucleophilic aromatic substitution - mechanochemistry (Mech. SNAr)
old	Mech. SNAr1	81	100	47.465	6.25045	4.17	34.715
old	Mech. SNAr2	88	100	46.787	5.73083	4.17	34.715
old	Mech. SNAr3	84	100	47.487	6.27246	4.17	34.715
new	Mech. SNAr4	95	97	193.18	37.4593	4.08	50.4975
Average		87	99.25	83.7297	13.9283	4.1475	38.6606
Nucleophilic aromatic substitution - in-solution (Sol. SNAr)
old	Sol. SNAr1	55	97	953.321	356.969	75.92	226.543
old	Sol. SNAr2	48	98	949.028	357.11	75.92	226.543
old	Sol. SNAr3	66	97	918.792	355.514	75.92	226.543
new	Sol. SNAr4	95	99	257.375	43.7156	72.87	221.946
Average		66	97.75	769.629	278.327	75.1575	225.394
Sulfonylation - mechanochemistry (Mech. S)
old	Mech. S1	84	98	129.834	20.8655	1.17	27.0416
old	Mech. S2	76	99	112.371	13.9252	1.17	27.0416
old	Mech. S3	79	100	50.89	0.714566	0.75	14.7224
new	Mech. S4	86	100	104.394	2.50114	1.33	19.6054
Average		81.25	99.25	99.3722	9.5016	1.105	22.1028
Sulfonylation - in-solution (Sol. S)
old	Sol. S1	80	98	715.863	343.205	6.08	61.6441
old	Sol. S2	73	96	741.434	362.625	6.08	61.6441
old	Sol. S3	62	99	739.361	360.994	6.08	61.6441
new	Sol. S4	73	97	157.491	4.37375	1.83	21.6444
Average		72	97.5	588.537	267.8	5.0175	51.6442

## Sheet: Averaged results
RGBsynt
			R1: Yield	R2: Purity	G1/B1: E-factor	G2: ChlorTox	B2: Time-efficiency	G3/B3: Energy
	Reference (average)		76.3625	98.1188	348.097	148.637	17.9385	85.4183
	Method 1	Mech. O	79.5	99.25	134.625	34.7574	3.27	45.1721
	Method 2	Sol. O	65.75	96.75	410.601	276.182	23.7925	123.297
	Method 3	Mech. N	88.2	97.4	149.751	32.2126	4.332	48.1728
	Method 4	Sol. N	71.2	97.8	548.535	276.384	26.686	128.903
	Method 5	Mech. SNAr	87	99.25	83.7297	13.9283	4.1475	38.6606
	Method 6	Sol. SNAr	66	97.75	769.629	278.327	75.1575	225.394
	Method 7	Mech. S	81.25	99.25	99.3722	9.5016	1.105	22.1028
	Method 8	Sol. S	72	97.5	588.537	267.8	5.0175	51.6442
	Method 9	…	…	…	…	…	…	…
	Method 10	…	…	…	…	…	…	…
										Mech. O					Sol. O					Mech. N					Sol. N					Mech. SNAr
										Individual criteria					Individual criteria					Individual criteria					Individual criteria					Individual criteria
										R1: Yield		R2: Purity			R1: Yield		R2: Purity			R1: Yield		R2: Purity			R1: Yield		R2: Purity			R1: Yield		R2: Purity
										53.5542		71.4964			40.8335		36.6626			66.7019		41.9805			45.0775		46.0949			64.5172		71.4964
										G1/B1: E-factor	G2: ChlorTox		G3/B3: Energy		G1/B1: E-factor	G2: ChlorTox		G3/B3: Energy		G1/B1: E-factor	G2: ChlorTox		G3/B3: Energy		G1/B1: E-factor	G2: ChlorTox		G3/B3: Energy		G1/B1: E-factor	G2: ChlorTox		G3/B3: Energy
											81.0477					34.9882					82.1881					34.9716					91.4322
										72.1113			65.4093		45.8809			40.9257		69.9203			63.9401		38.8228			39.8553		80.6104			68.8419
											B2: Time-efficiency					B2: Time-efficiency					B2: Time-efficiency					B2: Time-efficiency					B2: Time-efficiency
											84.5817					42.986					80.5483					40.1988					81.2211
										Color saturation					Color saturation					Color saturation					Color saturation					Color saturation
										Red:	61.8784		White:		Red:	38.6919		White:		Red:	52.9167		White:		Red:	45.5834		White:		Red:	67.9172		White:
										Green:	74.6072		70.5976		Green:	38.9375		40.2117		Green:	74.1308		66.0295		Green:	37.0895		40.6617		Green:	82.5297		75.8278
										Blue:	76.2165				Blue:	43.1589				Blue:	73.3875				Blue:	39.7649				Blue:	77.7849
										Conclusion					Conclusion					Conclusion					Conclusion					Conclusion
										Mech. O seems not most green					Sol. O seems not most green					Mech. N seems not most green					Sol. N seems not most green					Mech. SNAr seems not most green
										Mech. O seems not most white					Sol. O seems not most white					Mech. N seems not most white					Sol. N seems not most white					Mech. SNAr seems not most white
										Sol. SNAr					Mech. S					Sol. S					…					…
										Individual criteria					Individual criteria					Individual criteria					Individual criteria					Individual criteria
										R1: Yield		R2: Purity			R1: Yield		R2: Purity			R1: Yield		R2: Purity			R1: Yield		R2: Purity			R1: Yield		R2: Purity
										41.0106		45.5371			55.7653		71.4964			45.7758		42.9387			#VALUE!		#VALUE!			#VALUE!		#VALUE!
										G1/B1: E-factor	G2: ChlorTox		G3/B3: Energy		G1/B1: E-factor	G2: ChlorTox		G3/B3: Energy		G1/B1: E-factor	G2: ChlorTox		G3/B3: Energy		G1/B1: E-factor	G2: ChlorTox		G3/B3: Energy		G1/B1: E-factor	G2: ChlorTox		G3/B3: Energy
											34.8125					93.9916					35.6925					#VALUE!					#VALUE!
										31.1434			27.4823		77.7924			79.4433		37.1647			62.3207		#VALUE!			#VALUE!		#VALUE!			#VALUE!
											B2: Time-efficiency					B2: Time-efficiency					B2: Time-efficiency					B2: Time-efficiency					B2: Time-efficiency
											19.2688					94.1975					78.143					#VALUE!					#VALUE!
										Color saturation					Color saturation					Color saturation					Color saturation					Color saturation
										Red:	43.2146		White:		Red:	63.1428		White:		Red:	44.3346		White:		Red:	#VALUE!		White:		Red:	#VALUE!		White:
										Green:	31.9133		31.9923		Green:	85.9594		77.5881		Green:	41.4457		48.3006		Green:	#VALUE!		#VALUE!		Green:	#VALUE!		#VALUE!
										Blue:	23.7428				Blue:	86.0535				Blue:	61.3247				Blue:	#VALUE!				Blue:	#VALUE!
										Conclusion					Conclusion					Conclusion					Conclusion					Conclusion
										Sol. SNAr seems not most green					Mech. S seems most green					Sol. S seems not most green					#VALUE!					#VALUE!
										Sol. SNAr seems not most white					Mech. S seems most white					Sol. S seems not most white					#VALUE!					#VALUE!
										Method	Redness	Greenness	Blueness	Whiteness
										Mech. O	61.8784	74.6072	76.2165	70.5976
										Sol. O	38.6919	38.9375	43.1589	40.2117
										Mech. N	52.9167	74.1308	73.3875	66.0295
										Sol. N	45.5834	37.0895	39.7649	40.6617
										Mech. SNAr	67.9172	82.5297	77.7849	75.8278
										Sol. SNAr	43.2146	31.9133	23.7428	31.9923
										Mech. S	63.1428	85.9594	86.0535	77.5881
										Sol. S	44.3346	41.4457	61.3247	48.3006
										…	#VALUE!	#VALUE!	#VALUE!	#VALUE!
										…	#VALUE!	#VALUE!	#VALUE!	#VALUE!
										Mech. O	61.8784	74.6072	76.2165	70.5976
										Sol. O	38.6919	38.9375	43.1589	40.2117
										Mech. N	52.9167	74.1308	73.3875	66.0295
										Sol. N	45.5834	37.0895	39.7649	40.6617
										Mech. SNAr	67.9172	82.5297	77.7849	75.8278
										Sol. SNAr	43.2146	31.9133	23.7428	31.9923
										Mech. S	63.1428	85.9594	86.0535	77.5881
										Sol. S	44.3346	41.4457	61.3247	48.3006
										…	…	…	…	…
										…	…	…	…	…
										Maximum	67.9172	85.9594	86.0535	77.5881

## Sheet: Template
RGBsynt
			R1: Yield	R2: Purity	G1/B1: E-factor	G2: ChlorTox	B2: Time-efficiency	G3/B3: Energy
	Reference (average)		#DIV/0!	#DIV/0!	#DIV/0!	#DIV/0!	#DIV/0!	#DIV/0!
	Method 1	…	..	..	…	…	…	…
	Method 2	…	..	..	…	…	…	…
	Method 3	…	…	…	…	…	…	…
	Method 4	…	…	…	…	…	…	…
	Method 5	…	…	…	…	…	…	…
	Method 6	…	…	…	…	…	…	…
	Method 7	…	…	…	…	…	…	…
	Method 8	…	…	…	…	…	…	…
	Method 9	…	…	…	…	…	…	…
	Method 10	…	…	…	…	…	…	…
	G2: ChlorTox Scale
	…
		Reagent	CAS	Mass (g) / 1 g of product	CHsub (WHN)	ChlorTox [g]	Total ChlorTox [g]		G3/B3: Energy		Weight	…	…	…	…	…	…	…	…	…	…	Examples
	1					0	0		Low-power instruments		1
	2					0			Medium-power instruments		2
	3					0			High-power intruments		3
	4					0			Very high-power instruments		4
	5					0					Estimated Energy Demand (EED)	#VALUE!	#VALUE!	#VALUE!	#VALUE!	#VALUE!	#VALUE!	#VALUE!	#VALUE!	#VALUE!	#VALUE!
	6					0
	7					0
	8					0
	9					0				…					…					…					…					…
	10					0				Individual criteria					Individual criteria					Individual criteria					Individual criteria					Individual criteria
	11					0				R1: Yield		R2: Purity			R1: Yield		R2: Purity			R1: Yield		R2: Purity			R1: Yield		R2: Purity			R1: Yield		R2: Purity
	12					0				#VALUE!		#VALUE!			#VALUE!		#VALUE!			#VALUE!		#VALUE!			#VALUE!		#VALUE!			#VALUE!		#VALUE!
	13					0
	14					0				G1/B1: E-factor	G2: ChlorTox		G3/B3: Energy		G1/B1: E-factor	G2: ChlorTox		G3/B3: Energy		G1/B1: E-factor	G2: ChlorTox		G3/B3: Energy		G1/B1: E-factor	G2: ChlorTox		G3/B3: Energy		G1/B1: E-factor	G2: ChlorTox		G3/B3: Energy
	15					0					#VALUE!					#VALUE!					#VALUE!					#VALUE!					#VALUE!
	…									#VALUE!			#VALUE!		#VALUE!			#VALUE!		#VALUE!			#VALUE!		#VALUE!			#VALUE!		#VALUE!			#VALUE!
		Reagent	CAS	Mass (g) / 1 g of product	CHsub (WHN)	ChlorTox [g]	Total ChlorTox [g]				B2: Time-efficiency					B2: Time-efficiency					B2: Time-efficiency					B2: Time-efficiency					B2: Time-efficiency
	1					0	0				#VALUE!					#VALUE!					#VALUE!					#VALUE!					#VALUE!
	2					0
	3					0				Color saturation					Color saturation					Color saturation					Color saturation					Color saturation
	4					0				Red:	#VALUE!		White:		Red:	#VALUE!		White:		Red:	#VALUE!		White:		Red:	#VALUE!		White:		Red:	#VALUE!		White:
	5					0				Green:	#VALUE!		#VALUE!		Green:	#VALUE!		#VALUE!		Green:	#VALUE!		#VALUE!		Green:	#VALUE!		#VALUE!		Green:	#VALUE!		#VALUE!
	6					0				Blue:	#VALUE!				Blue:	#VALUE!				Blue:	#VALUE!				Blue:	#VALUE!				Blue:	#VALUE!
	7					0				Conclusion					Conclusion					Conclusion					Conclusion					Conclusion
	8					0				#VALUE!					#VALUE!					#VALUE!					#VALUE!					#VALUE!
	9					0				#VALUE!					#VALUE!					#VALUE!					#VALUE!					#VALUE!
	10					0
	11					0
	12					0				…					…					…					…					…
	13					0				Individual criteria					Individual criteria					Individual criteria					Individual criteria					Individual criteria
	14					0				R1: Yield		R2: Purity			R1: Yield		R2: Purity			R1: Yield		R2: Purity			R1: Yield		R2: Purity			R1: Yield		R2: Purity
	15					0				#VALUE!		#VALUE!			#VALUE!		#VALUE!			#VALUE!		#VALUE!			#VALUE!		#VALUE!			#VALUE!		#VALUE!
	…
		Reagent	CAS	Mass (g) / 1 g of product	CHsub (WHN)	ChlorTox [g]	Total ChlorTox [g]			G1/B1: E-factor	G2: ChlorTox		G3/B3: Energy		G1/B1: E-factor	G2: ChlorTox		G3/B3: Energy		G1/B1: E-factor	G2: ChlorTox		G3/B3: Energy		G1/B1: E-factor	G2: ChlorTox		G3/B3: Energy		G1/B1: E-factor	G2: ChlorTox		G3/B3: Energy
	1					0	0				#VALUE!					#VALUE!					#VALUE!					#VALUE!					#VALUE!
	2					0				#VALUE!			#VALUE!		#VALUE!			#VALUE!		#VALUE!			#VALUE!		#VALUE!			#VALUE!		#VALUE!			#VALUE!
	3					0					B2: Time-efficiency					B2: Time-efficiency					B2: Time-efficiency					B2: Time-efficiency					B2: Time-efficiency
	4					0					#VALUE!					#VALUE!					#VALUE!					#VALUE!					#VALUE!
	5					0
	6					0				Color saturation					Color saturation					Color saturation					Color saturation					Color saturation
	7					0				Red:	#VALUE!		White:		Red:	#VALUE!		White:		Red:	#VALUE!		White:		Red:	#VALUE!		White:		Red:	#VALUE!		White:
	8					0				Green:	#VALUE!		#VALUE!		Green:	#VALUE!		#VALUE!		Green:	#VALUE!		#VALUE!		Green:	#VALUE!		#VALUE!		Green:	#VALUE!		#VALUE!
	9					0				Blue:	#VALUE!				Blue:	#VALUE!				Blue:	#VALUE!				Blue:	#VALUE!				Blue:	#VALUE!
	10					0				Conclusion					Conclusion					Conclusion					Conclusion					Conclusion
	11					0				#VALUE!					#VALUE!					#VALUE!					#VALUE!					#VALUE!
	12					0				#VALUE!					#VALUE!					#VALUE!					#VALUE!					#VALUE!
	13					0
	14					0
	15					0
	…									Method	Redness	Greenness	Blueness	Whiteness
		Reagent	CAS	Mass (g) / 1 g of product	CHsub (WHN)	ChlorTox [g]	Total ChlorTox [g]			…	#VALUE!	#VALUE!	#VALUE!	#VALUE!
	1					0	0			…	#VALUE!	#VALUE!	#VALUE!	#VALUE!
	2					0				…	#VALUE!	#VALUE!	#VALUE!	#VALUE!
	3					0				…	#VALUE!	#VALUE!	#VALUE!	#VALUE!
	4					0				…	#VALUE!	#VALUE!	#VALUE!	#VALUE!
	5					0				…	#VALUE!	#VALUE!	#VALUE!	#VALUE!
	6					0				…	#VALUE!	#VALUE!	#VALUE!	#VALUE!
	7					0				…	#VALUE!	#VALUE!	#VALUE!	#VALUE!
	8					0				…	#VALUE!	#VALUE!	#VALUE!	#VALUE!
	9					0				…	#VALUE!	#VALUE!	#VALUE!	#VALUE!
	10					0
	11					0				…	…	…	…	…
	12					0				…	…	…	…	…
	13					0				…	…	…	…	…
	14					0				…	…	…	…	…
	15					0				…	…	…	…	…
	…									…	…	…	…	…
		Reagent	CAS	Mass (g) / 1 g of product	CHsub (WHN)	ChlorTox [g]	Total ChlorTox [g]			…	…	…	…	…
	1					0	0			…	…	…	…	…
	2					0				…	…	…	…	…
	3					0				…	…	…	…	…
	4					0
	5					0				Maximum	0	0	0	0
	6					0
	7					0
	8					0
	9					0
	10					0
	11					0
	12					0
	13					0
	14					0
	15					0
	…
		Reagent	CAS	Mass (g) / 1 g of product	CHsub (WHN)	ChlorTox [g]	Total ChlorTox [g]
	1					0	0
	2					0
	3					0
	4					0
	5					0
	6					0
	7					0
	8					0
	9					0
	10					0
	11					0
	12					0
	13					0
	14					0
	15					0
	…
		Reagent	CAS	Mass (g) / 1 g of product	CHsub (WHN)	ChlorTox [g]	Total ChlorTox [g]
	1					0	0
	2					0
	3					0
	4					0
	5					0
	6					0
	7					0
	8					0
	9					0
	10					0
	11					0
	12					0
	13					0
	14					0
	15					0
	…
		Reagent	CAS	Mass (g) / 1 g of product	CHsub (WHN)	ChlorTox [g]	Total ChlorTox [g]
	1					0	0
	2					0
	3					0
	4					0
	5					0
	6					0
	7					0
	8					0
	9					0
	10					0
	11					0
	12					0
	13					0
	14					0
	15					0
	…
		Reagent	CAS	Mass (g) / 1 g of product	CHsub (WHN)	ChlorTox [g]	Total ChlorTox [g]
	1					0	0
	2					0
	3					0
	4					0
	5					0
	6					0
	7					0
	8					0
	9					0
	10					0
	11					0
	12					0
	13					0
	14					0
	15					0
	…
		Reagent	CAS	Mass (g) / 1 g of product	CHsub (WHN)	ChlorTox [g]	Total ChlorTox [g]
	1					0	0
	2					0
	3					0
	4					0
	5					0
	6					0
	7					0
	8					0
	9					0
	10					0
	11					0
	12					0
	13					0
	14					0
	15					0

## Sheet: ChlorTox Base
Name of chemical	CAS number	Category	Sub-category	Molecular weight (g/mol)	SDS supplier	Revision date (dd.mm.yyyy)	Link to SDS (pdf)	Weighted hazards number	Average WHN (CHsub)	SD	RSD (%)	Hazards number	Hazards category 1	Hazards category 2	Hazards category 3	Hazards category 4	Hazards category 5	Pictograms	Average	Word code	Number of precautionary statements	Average
Chloroform (standard)	67-66-3	organic	liquid	119.38	Sigma-Aldrich	2022-10-19	https://sds.chemicalsafety.com/sds/pda/msds/getpdf.ashx?action=msdsdocument&auth=200C200C200C200C2008207A200D2078200C200C200C200C200C200C200C200C200C2008&param1=ZmRwLjFfODUxOTM0MDNORQ==&unique=1677157192&session=10158fc67466c96792c3f504b6473b73&hostname=139.28.41.7	5.75	5.83333	1.12731	19.3254	9	1	4	3	1	0	3	2.33333	danger	19	15
Chloroform (standard)	67-66-3	organic	liquid	119.38	Thermo Fisher	2020-02-14	https://sds.chemicalsafety.com/sds/pda/msds/getpdf.ashx?action=msdsdocument&auth=200C200C200C200C2008207A200D2078200C200C200C200C200C200C200C200C200C2008&param1=ZmRwLjFfNzY3OTkyMTNORQ==&unique=1677157414&session=10158fc67466c96792c3f504b6473b73&hostname=139.28.41.7	7				10	2	5	2	1	0	2		danger	20
Chloroform (standard)	67-66-3	organic	liquid	119.38	PANREAC QUIMICA S.L.U.	2020-02-20	https://sds.chemicalsafety.com/sds/pda/msds/getpdf.ashx?action=msdsdocument&auth=200C200C200C200C2008207A200D2078200C200C200C200C200C200C200C200C200C2008&param1=ZmRwLjFfOTQ5Nzg1MDNORQ==&unique=1677157348&session=10158fc67466c96792c3f504b6473b73&hostname=139.28.41.7	4.75				7	1	4	1	1	0	2		danger	6
Propionic acid	79-09-4	organic	liquid	74.08	Sigma-Aldrich	2022-10-29	https://sds.chemicalsafety.com/sds/pda/msds/getpdf.ashx?action=msdsdocument&auth=200C200C200C200C2008207A200D2078200C200C200C200C200C200C200C200C200C2008&param1=ZmRwLjFfMTI2MzI2MDNORQ==&unique=1678220664&session=ffe609ad4d87d36f4049e78c6027dbfe&hostname=139.28.41.7	3	2.41667	1.35708	56.155	4	2	0	2	0	0	3	2.33333	danger	20	15.4
Propionic acid	79-09-4	organic	liquid	74.08	Combi-Blocks	2023-01-02	https://sds.chemicalsafety.com/sds/pda/msds/getpdf.ashx?action=msdsdocument&auth=200C200C200C200C2008207A200D2078200C200C200C200C200C200C200C200C200C2008&param1=ZmRwLjFfNTYwODUxMTNORQ==&unique=1678220716&session=ffe609ad4d87d36f4049e78c6027dbfe&hostname=139.28.41.7	2				3	1	0	2	0	0	3		danger	20
Propionic acid	79-09-4	organic	liquid	74.08	THE DOW CHEMICAL COMPANY	2021-10-22	https://sds.chemicalsafety.com/sds/pda/msds/getpdf.ashx?action=msdsdocument&auth=200C200C200C200C2008207A200D2078200C200C200C200C200C200C200C200C200C2008&param1=ZmRwLjFfMzQ1MDU1MjNORQ==&unique=1678220771&session=ffe609ad4d87d36f4049e78c6027dbfe&hostname=139.28.41.7	2.5				3	2	0	1	0	0	2		danger	16
Propionic acid	79-09-4	organic	liquid	74.08	Honeywell International Inc	2022-02-03	https://sds.chemicalsafety.com/sds/pda/msds/getpdf.ashx?action=msdsdocument&auth=200C200C200C200C2008207A200D2078200C200C200C200C200C200C200C200C200C2008&param1=ZmRwLjFfOTE3MTM0MjNORQ==&unique=1678220866&session=ffe609ad4d87d36f4049e78c6027dbfe&hostname=139.28.41.7	4				5	3	0	2	0	0	3		danger	21
Propionic acid	79-09-4	organic	liquid	74.08	SPEX CertiPrep, LLC	2021-02-22	https://sds.chemicalsafety.com/sds/pda/msds/getpdf.ashx?action=msdsdocument&auth=200C200C200C200C2008207A200D2078200C200C200C200C200C200C200C200C200C2008&param1=ZmRwLjFfNjA1NjkxMDNORQ==&unique=1678220961&session=ffe609ad4d87d36f4049e78c6027dbfe&hostname=139.28.41.7	0				0	0	0	0	0	0	0		none	0
Propionic acid	79-09-4	organic	liquid	74.08	U. S. Pharmacopeia	2022-08-23	https://sds.chemicalsafety.com/sds/pda/msds/getpdf.ashx?action=msdsdocument&auth=200C200C200C200C2008207A200D2078200C200C200C200C200C200C200C200C200C2008&param1=ZmRwLjFfNDkzNzQ1MjNORQ==&unique=1678221028&session=ffe609ad4d87d36f4049e78c6027dbfe&hostname=139.28.41.7	3				4	2	0	2	0	0	3		danger
Tris(hydroxymethyl)aminomethane	77-86-1	organic	solid	121.14	Sigma-Aldrich	2021-03-01	https://sds.chemicalsafety.com/sds/pda/msds/getpdf.ashx?action=msdsdocument&auth=200C200C200C200C2008207A200D2078200C200C200C200C200C200C200C200C200C2008&param1=ZmRwLjFfNTY2MDcwMDNORQ==&unique=1677438692&session=bdf11b8600b42b0c2a10febd77821c6b&hostname=78.8.217.118	0	0	0	0	0	0	0	0	0	0	0	0	none	0	0
Tris(hydroxymethyl)aminomethane	77-86-1	organic	solid	121.14	Thermo Fisher	2020-02-14	https://sds.chemicalsafety.com/sds/pda/msds/getpdf.ashx?action=msdsdocument&auth=200C200C200C200C2008207A200D2078200C200C200C200C200C200C200C200C200C2008&param1=ZmRwLjVfNzQwODAzMTNORQ==&unique=1677438698&session=bdf11b8600b42b0c2a10febd77821c6b&hostname=78.8.217.118	0				0	0	0	0	0	0	0		none	0
Tris(hydroxymethyl)aminomethane	77-86-1	organic	solid	121.14	Sigma-Aldrich	2021-03-01	https://sds.chemicalsafety.com/sds/pda/msds/getpdf.ashx?action=msdsdocument&auth=200C200C200C200C2008207A200D2078200C200C200C200C200C200C200C200C200C2008&param1=ZmRwLjFfNTY2MDcwMDNORQ==&unique=1677441928&session=bdf11b8600b42b0c2a10febd77821c6b&hostname=78.8.217.118	0				0	0	0	0	0	0	0		none	0			More information on the ChlorTox Scale application:								https://doi.org/10.1016/j.greeac.2023.100056
Tris(hydroxymethyl)aminomethane	77-86-1	organic	solid	121.14	Thermo Fisher	2020-02-14	https://sds.chemicalsafety.com/sds/pda/msds/getpdf.ashx?action=msdsdocument&auth=200C200C200C200C2008207A200D2078200C200C200C200C200C200C200C200C200C2008&param1=ZmRwLjVfNzQwODAzMTNORQ==&unique=1677441930&session=bdf11b8600b42b0c2a10febd77821c6b&hostname=78.8.217.118	0				0	0	0	0	0	0	0		none	0
Tris(hydroxymethyl)aminomethane	77-86-1	organic	solid	121.14	AppliChem GmbH	2021-02-04	https://sds.chemicalsafety.com/sds/pda/msds/getpdf.ashx?action=msdsdocument&auth=200C200C200C200C2008207A200D2078200C200C200C200C200C200C200C200C200C2008&param1=ZmRwLjFfNTU4Nzg1MDNORQ==&unique=1677441908&session=bdf11b8600b42b0c2a10febd77821c6b&hostname=78.8.217.118	0				0	0	0	0	0	0	0		none	0
Triethanolamine	102-71-6	organic	liquid	149.19	Sigma-Aldrich	2022-10-19	https://sds.chemicalsafety.com/sds/pda/msds/getpdf.ashx?action=msdsdocument&auth=200C200C200C200C2008207A200D2078200C200C200C200C200C200C200C200C200C2008&param1=ZmRwLjFfMDM5NDgxMjNORQ==&unique=1677949268&session=0e1da735f43fe643971f4dc37256385c&hostname=78.8.217.118	0	0.45	0.67082	149.071	0	0	0	0	0	0	0	0.4	none	0	4.6
Triethanolamine	102-71-6	organic	liquid	149.19	Thermo Fisher	2022-03-11	https://sds.chemicalsafety.com/sds/pda/msds/getpdf.ashx?action=msdsdocument&auth=200C200C200C200C2008207A200D2078200C200C200C200C200C200C200C200C200C2008&param1=ZmRwLjFfMjA2NzAzMTNORQ==&unique=1677949273&session=0e1da735f43fe643971f4dc37256385c&hostname=78.8.217.118	0.75				1	0	1	0	0	0	1		warning	16
Triethanolamine	102-71-6	organic	liquid	149.19	PANREAC QUIMICA	2020-07-21	https://sds.chemicalsafety.com/sds/pda/msds/getpdf.ashx?action=msdsdocument&auth=200C200C200C200C2008207A200D2078200C200C200C200C200C200C200C200C200C2008&param1=ZmRwLjFfMDI3Nzg1MDNORQ==&unique=1677949261&session=0e1da735f43fe643971f4dc37256385c&hostname=78.8.217.118	0				0	0	0	0	0	0	0		none	0
Triethanolamine	102-71-6	organic	liquid	149.19	Combi-Blocks	2023-01-02	https://sds.chemicalsafety.com/sds/pda/msds/getpdf.ashx?action=msdsdocument&auth=200C200C200C200C2008207A200D2078200C200C200C200C200C200C200C200C200C2008&param1=ZmRwLjFfNDcwNjUxMTNORQ==&unique=1677949258&session=0e1da735f43fe643971f4dc37256385c&hostname=78.8.217.118	1.5				2	0	2	0	0	0	1		warning	7
Triethanolamine	102-71-6	organic	liquid	149.19	Avantor Performance Materials	2020-02-14	https://sds.chemicalsafety.com/sds/pda/msds/getpdf.ashx?action=msdsdocument&auth=200C200C200C200C2008207A200D2078200C200C200C200C200C200C200C200C200C2008&param1=ZmRwLjFfODQzMjkxMDNORQ==&unique=1677949258&session=0e1da735f43fe643971f4dc37256385c&hostname=78.8.217.118	0				0	0	0	0	0	0	0		none	0
Ammonium chloride	12125-02-9	inorganic	solid	53.49	Sigma-Aldrich	2021-11-25	https://sds.chemicalsafety.com/sds/pda/msds/getpdf.ashx?action=msdsdocument&auth=200C200C200C200C2008207A200D2078200C200C200C200C200C200C200C200C200C2008&param1=ZmRwLjFfMDkwMjAyMjNORQ==&unique=1677960462&session=0e1da735f43fe643971f4dc37256385c&hostname=78.8.217.118	1	1.15	0.33541	29.1661	2	0	1	0	1	0	1	1	warning	7	7
Ammonium chloride	12125-02-9	inorganic	solid	53.49	U. S. Pharmacopeia	2020-04-06	https://sds.chemicalsafety.com/sds/pda/msds/getpdf.ashx?action=msdsdocument&auth=200C200C200C200C2008207A200D2078200C200C200C200C200C200C200C200C200C2008&param1=ZmRwLjFfNjcwNzQ1MjNORQ==&unique=1677960449&session=0e1da735f43fe643971f4dc37256385c&hostname=78.8.217.118	1.75				3	0	2	0	1	0	1		warning
Ammonium chloride	12125-02-9	inorganic	solid	53.49	Thermo Fisher	2022-04-14	https://sds.chemicalsafety.com/sds/pda/msds/getpdf.ashx?action=msdsdocument&auth=200C200C200C200C2008207A200D2078200C200C200C200C200C200C200C200C200C2008&param1=ZmRwLjFfNTQ1OTkyMTNORQ==&unique=1677960446&session=0e1da735f43fe643971f4dc37256385c&hostname=78.8.217.118	1				2	0	1	0	1	0	1		warning	8
Ammonium chloride	12125-02-9	inorganic	solid	53.49	PANREAC QUIMICA	2020-02-13	https://sds.chemicalsafety.com/sds/pda/msds/getpdf.ashx?action=msdsdocument&auth=200C200C200C200C2008207A200D2078200C200C200C200C200C200C200C200C200C2008&param1=ZmRwLjFfNDgyNzg1MDNORQ==&unique=1677960438&session=0e1da735f43fe643971f4dc37256385c&hostname=78.8.217.118	1				2	0	1	0	1	0	1		warning	6
Ammonium chloride	12125-02-9	inorganic	solid	53.49	Combi-Blocks	2023-01-02	https://sds.chemicalsafety.com/sds/pda/msds/getpdf.ashx?action=msdsdocument&auth=200C200C200C200C2008207A200D2078200C200C200C200C200C200C200C200C200C2008&param1=ZmRwLjFfNjQ0NTYxMTNORQ==&unique=1677960434&session=0e1da735f43fe643971f4dc37256385c&hostname=78.8.217.118	1				2	0	1	0	1	0	1		warning	7
Riboflavin	83-88-5	organic	solid	376.37	Sigma-Aldrich	2020-04-24	https://sds.chemicalsafety.com/sds/pda/msds/getpdf.ashx?action=msdsdocument&auth=200C200C200C200C2008207A200D2078200C200C200C200C200C200C200C200C200C2008&param1=ZmRwLjJfMTcxMjgwMDNORQ==&unique=1677961978&session=0e1da735f43fe643971f4dc37256385c&hostname=78.8.217.118	0	0.45	1.00623	223.607	0	0	0	0	0	0	0	0.2	none	0	3
Riboflavin	83-88-5	organic	solid	376.37	Thermo Fisher	2020-02-14	https://sds.chemicalsafety.com/sds/pda/msds/getpdf.ashx?action=msdsdocument&auth=200C200C200C200C2008207A200D2078200C200C200C200C200C200C200C200C200C2008&param1=ZmRwLjFfNTYyNjAzMTNORQ==&unique=1677961980&session=0e1da735f43fe643971f4dc37256385c&hostname=78.8.217.118	0				0	0	0	0	0	0	0		none	0
Riboflavin	83-88-5	organic	solid	376.37	U. S. Pharmacopeia	2022-08-26	https://sds.chemicalsafety.com/sds/pda/msds/getpdf.ashx?action=msdsdocument&auth=200C200C200C200C2008207A200D2078200C200C200C200C200C200C200C200C200C2008&param1=ZmRwLjFfMzMzODQ1MjNORQ==&unique=1677961983&session=0e1da735f43fe643971f4dc37256385c&hostname=78.8.217.118	0				0	0	0	0	0	0	0		none	0
Riboflavin	83-88-5	organic	solid	376.37	Combi-Blocks	2023-01-02	https://sds.chemicalsafety.com/sds/pda/msds/getpdf.ashx?action=msdsdocument&auth=200C200C200C200C2008207A200D2078200C200C200C200C200C200C200C200C200C2008&param1=ZmRwLjFfMTAyNzUxMTNORQ==&unique=1677961969&session=0e1da735f43fe643971f4dc37256385c&hostname=78.8.217.118	2.25				4	0	2	1	1	0	1		warning	15
Riboflavin	83-88-5	organic	solid	376.37	AppliChem GmbH	2021-04-13	https://sds.chemicalsafety.com/sds/pda/msds/getpdf.ashx?action=msdsdocument&auth=200C200C200C200C2008207A200D2078200C200C200C200C200C200C200C200C200C2008&param1=ZmRwLjFfMzk4Nzg1MDNORQ==&unique=1677961969&session=0e1da735f43fe643971f4dc37256385c&hostname=78.8.217.118	0				0	0	0	0	0	0	0		none	0
Calcium chloride	10043-52-4	inorganic	solid	110.98	Sigma-Aldrich	2022-10-19	https://sds.chemicalsafety.com/sds/pda/msds/getpdf.ashx?action=msdsdocument&auth=200C200C200C200C2008207A200D2078200C200C200C200C200C200C200C200C200C2008&param1=ZmRwLjFfNDQ1ODgxMjNORQ==&unique=1678020667&session=60679ec97dfd8e96885c0cbe0e61b143&hostname=139.28.41.7	0.75	0.9	0.33541	37.2678	1	0	1	0	0	0	1	1	warning	4	5
Calcium chloride	10043-52-4	inorganic	solid	110.98	Thermo Fisher	2020-02-14	https://sds.chemicalsafety.com/sds/pda/msds/getpdf.ashx?action=msdsdocument&auth=200C200C200C200C2008207A200D2078200C200C200C200C200C200C200C200C200C2008&param1=ZmRwLjFfMjEwOTkyMTNORQ==&unique=1678020874&session=60679ec97dfd8e96885c0cbe0e61b143&hostname=139.28.41.7	0.75				1	0	1	0	0	0	1		warning	8
Calcium chloride	10043-52-4	inorganic	solid	110.98	Combi-Blocks	2023-01-02	https://sds.chemicalsafety.com/sds/pda/msds/getpdf.ashx?action=msdsdocument&auth=200C200C200C200C2008207A200D2078200C200C200C200C200C200C200C200C200C2008&param1=ZmRwLjFfOTM0NzUxMTNORQ==&unique=1678020928&session=60679ec97dfd8e96885c0cbe0e61b143&hostname=139.28.41.7	0.75				1	0	1	0	0	0	1		warning	4
Calcium chloride	10043-52-4	inorganic	solid	110.98	AppliChem GmbH	2020-09-29	https://sds.chemicalsafety.com/sds/pda/msds/getpdf.ashx?action=msdsdocument&auth=200C200C200C200C2008207A200D2078200C200C200C200C200C200C200C200C200C2008&param1=ZmRwLjFfNTUzNzg1MDNORQ==&unique=1678020961&session=60679ec97dfd8e96885c0cbe0e61b143&hostname=139.28.41.7	0.75				1	0	1	0	0	0	1		warning	4
Calcium chloride	10043-52-4	inorganic	solid	110.98	Avantor Performance Materials	2020-01-30	https://sds.chemicalsafety.com/sds/pda/msds/getpdf.ashx?action=msdsdocument&auth=200C200C200C200C2008207A200D2078200C200C200C200C200C200C200C200C200C2008&param1=ZmRwLjFfODU2MTkxMDNORQ==&unique=1678021009&session=60679ec97dfd8e96885c0cbe0e61b143&hostname=139.28.41.7	1.5				3	0	1	1	1	0	1		warning
Glycerol	56-81-5	organic	liquid, DES component	92.09	Sigma-Aldrich	2022-06-15	https://sds.chemicalsafety.com/sds/pda/msds/getpdf.ashx?action=msdsdocument&auth=200C200C200C200C2008207A200D2078200C200C200C200C200C200C200C200C200C2008&param1=ZmRwLjFfNzYxNDgxMjNORQ==&unique=1678107620&session=60679ec97dfd8e96885c0cbe0e61b143&hostname=139.28.41.7	0	0.45	1.00623	223.607	0	0	0	0	0	0	0	0.4	none	0	2.6		More information on the ChlorTox Base application:								https://doi.org/10.1016/j.greeac.2023.100065
Glycerol	56-81-5	organic	liquid, DES component	92.09	Thermo Fisher	2020-02-14	https://sds.chemicalsafety.com/sds/pda/msds/getpdf.ashx?action=msdsdocument&auth=200C200C200C200C2008207A200D2078200C200C200C200C200C200C200C200C200C2008&param1=ZmRwLjFfMTA0MTAzMTNORQ==&unique=1678107744&session=60679ec97dfd8e96885c0cbe0e61b143&hostname=139.28.41.7	0				0	0	0	0	0	0	0		none	0
Glycerol	56-81-5	organic	liquid, DES component	92.09	Combi-Blocks	2023-01-02	https://sds.chemicalsafety.com/sds/pda/msds/getpdf.ashx?action=msdsdocument&auth=200C200C200C200C2008207A200D2078200C200C200C200C200C200C200C200C200C2008&param1=ZmRwLjFfMjIzODUxMTNORQ==&unique=1678107780&session=60679ec97dfd8e96885c0cbe0e61b143&hostname=139.28.41.7	2.25				3	0	3	0	0	0	2		warning	13
Glycerol	56-81-5	organic	liquid, DES component	92.09	PANREAC QUIMICA S.L.U.	2021-04-28	https://sds.chemicalsafety.com/sds/pda/msds/getpdf.ashx?action=msdsdocument&auth=200C200C200C200C2008207A200D2078200C200C200C200C200C200C200C200C200C2008&param1=ZmRwLjFfOTEzNzg1MDNORQ==&unique=1678107835&session=60679ec97dfd8e96885c0cbe0e61b143&hostname=139.28.41.7	0				0	0	0	0	0	0	0		none	0
Glycerol	56-81-5	organic	liquid, DES component	92.09	Honeywell International Inc	2022-11-14	https://sds.chemicalsafety.com/sds/pda/msds/getpdf.ashx?action=msdsdocument&auth=200C200C200C200C2008207A200D2078200C200C200C200C200C200C200C200C200C2008&param1=ZmRwLjJfMzk4MTM0MjNORQ==&unique=1678107878&session=60679ec97dfd8e96885c0cbe0e61b143&hostname=139.28.41.7	0				0	0	0	0	0	0	0		none	0
1-Pentanol	71-41-0	organic	liquid	88.15	Sigma-Aldrich	2021-09-23	https://sds.chemicalsafety.com/sds/pda/msds/getpdf.ashx?action=msdsdocument&auth=200C200C200C200C2008207A200D2078200C200C200C200C200C200C200C200C200C2008&param1=ZmRwLjFfMzc2MjMwMDNORQ==&unique=1678275918&session=16a6a8da7e51bf4b79e724bfec6661d4&hostname=139.28.41.7	3	2.9	0.627495	21.6378	5	1	1	2	1	0	3	2.4	danger	20	15.75
1-Pentanol	71-41-0	organic	liquid	88.15	Thermo Fisher	2020-02-14	https://sds.chemicalsafety.com/sds/pda/msds/getpdf.ashx?action=msdsdocument&auth=200C200C200C200C2008207A200D2078200C200C200C200C200C200C200C200C200C2008&param1=ZmRwLjFfMzc5MTEzMTNORQ==&unique=1678276039&session=16a6a8da7e51bf4b79e724bfec6661d4&hostname=139.28.41.7	3.75				6	1	2	2	1	0	2		warning	22
1-Pentanol	71-41-0	organic	liquid	88.15	Combi-Blocks	2023-01-02	https://sds.chemicalsafety.com/sds/pda/msds/getpdf.ashx?action=msdsdocument&auth=200C200C200C200C2008207A200D2078200C200C200C200C200C200C200C200C200C2008&param1=ZmRwLjFfODUwNTUxMTNORQ==&unique=1678276098&session=16a6a8da7e51bf4b79e724bfec6661d4&hostname=139.28.41.7	2.75				5	0	2	2	1	0	2		warning	20
1-Pentanol	71-41-0	organic	liquid	88.15	PANREAC QUIMICA S.L.U.	2020-11-20	https://sds.chemicalsafety.com/sds/pda/msds/getpdf.ashx?action=msdsdocument&auth=200C200C200C200C2008207A200D2078200C200C200C200C200C200C200C200C200C2008&param1=ZmRwLjFfMDgzNzg1MDNORQ==&unique=1678276152&session=16a6a8da7e51bf4b79e724bfec6661d4&hostname=139.28.41.7	2				4	0	1	2	1	0	2		warning	1
1-Pentanol	71-41-0	organic	liquid	88.15	U. S. Pharmacopeia	2021-02-18	https://sds.chemicalsafety.com/sds/pda/msds/getpdf.ashx?action=msdsdocument&auth=200C200C200C200C2008207A200D2078200C200C200C200C200C200C200C200C200C2008&param1=ZmRwLjFfNTQwODQ1MjNORQ==&unique=1678276209&session=16a6a8da7e51bf4b79e724bfec6661d4&hostname=139.28.41.7	3				5	1	1	2	1	0	3		danger
Isopropyl myristate	110-27-0	organic	liquid	270.45	Sigma-Aldrich	2022-10-19	https://sds.chemicalsafety.com/sds/pda/msds/getpdf.ashx?action=msdsdocument&auth=200C200C200C200C2008207A200D2078200C200C200C200C200C200C200C200C200C2008&param1=ZmRwLjFfMzYzMjYwMDNORQ==&unique=1678279977&session=9fb99e836c4b7336d87ac9618d7cc9cd&hostname=139.28.41.7	0	0.3	0.410792	136.931	0	0	0	0	0	0	0	0.2	none	0	1.25
Isopropyl myristate	110-27-0	organic	liquid	270.45	Thermo Fisher	2020-02-14	https://sds.chemicalsafety.com/sds/pda/msds/getpdf.ashx?action=msdsdocument&auth=200C200C200C200C2008207A200D2078200C200C200C200C200C200C200C200C200C2008&param1=ZmRwLjFfNTg5MzAzMTNORQ==&unique=1678280066&session=9fb99e836c4b7336d87ac9618d7cc9cd&hostname=139.28.41.7	0				0	0	0	0	0	0	0		none	0
Isopropyl myristate	110-27-0	organic	liquid	270.45	Combi-Blocks	2023-01-02	https://sds.chemicalsafety.com/sds/pda/msds/getpdf.ashx?action=msdsdocument&auth=200C200C200C200C2008207A200D2078200C200C200C200C200C200C200C200C200C2008&param1=ZmRwLjFfMTY2MzYxMTNORQ==&unique=1678280105&session=9fb99e836c4b7336d87ac9618d7cc9cd&hostname=139.28.41.7	0.75				1	0	1	0	0	0	1		warning	5
Isopropyl myristate	110-27-0	organic	liquid	270.45	AppliChem GmbH	2021-03-11	https://sds.chemicalsafety.com/sds/pda/msds/getpdf.ashx?action=msdsdocument&auth=200C200C200C200C2008207A200D2078200C200C200C200C200C200C200C200C200C2008&param1=ZmRwLjFfMDYyNzg1MDNORQ==&unique=1678280142&session=9fb99e836c4b7336d87ac9618d7cc9cd&hostname=139.28.41.7	0				0	0	0	0	0	0	0		none	0
Isopropyl myristate	110-27-0	organic	liquid	270.45	U. S. Pharmacopeia	2022-06-06	https://sds.chemicalsafety.com/sds/pda/msds/getpdf.ashx?action=msdsdocument&auth=200C200C200C200C2008207A200D2078200C200C200C200C200C200C200C200C200C2008&param1=ZmRwLjFfODk2NjQ1MjNORQ==&unique=1678280178&session=9fb99e836c4b7336d87ac9618d7cc9cd&hostname=139.28.41.7	0.75				1	0	1	0	0	0	0		warning
2-Propanol	67-63-0	organic	liquid	60.10	Sigma-Aldrich	2021-10-08	https://sds.chemicalsafety.com/sds/pda/msds/getpdf.ashx?action=msdsdocument&auth=200C200C200C200C2008207A200D2078200C200C200C200C200C200C200C200C200C2008&param1=ZmRwLjFfMzEwNDgxMjNORQ==&unique=1676976090&session=23742bc2319efd3fb56ee581bcf57170&hostname=139.28.41.7	2	3.125	1.36168	43.5737	3	0	2	1	0	0	2	2.5	danger	19	15.3333
2-Propanol	67-63-0	organic	liquid	60.10	Avantor Performance Materials	2020-05-27	https://sds.chemicalsafety.com/sds/pda/msds/getpdf.ashx?action=msdsdocument&auth=200C200C200C200C2008207A200D2078200C200C200C200C200C200C200C200C200C2008&param1=ZmRwLjFfODI1MjkxMDNORQ==&unique=1676976244&session=23742bc2319efd3fb56ee581bcf57170&hostname=139.28.41.7	3.75				5	1	3	1	0	0	3		danger
2-Propanol	67-63-0	organic	liquid	60.10	PANREAC QUIMICA S.L.U.	2021-04-13	https://sds.chemicalsafety.com/sds/pda/msds/getpdf.ashx?action=msdsdocument&auth=200C200C200C200C2008207A200D2078200C200C200C200C200C200C200C200C200C2008&param1=ZmRwLjFfMDE5Nzg1MDNORQ==&unique=1676976462&session=23742bc2319efd3fb56ee581bcf57170&hostname=139.28.41.7	2				3	0	2	1	0	0	2		danger	6
2-Propanol	67-63-0	organic	liquid	60.10	Thermo Fisher	2020-02-14	https://sds.chemicalsafety.com/sds/pda/msds/getpdf.ashx?action=msdsdocument&auth=200C200C200C200C2008207A200D2078200C200C200C200C200C200C200C200C200C2008&param1=ZmRwLjFfMTMyMDkyMTNORQ==&unique=1676976590&session=23742bc2319efd3fb56ee581bcf57170&hostname=139.28.41.7	4.75				6	2	3	1	0	0	3		danger	21
Acetone	67-64-1	organic	liquid	58.08	Sigma-Aldrich	2022-10-19	https://sds.chemicalsafety.com/sds/pda/msds/getpdf.ashx?action=msdsdocument&auth=200C200C200C200C2008207A200D2078200C200C200C200C200C200C200C200C200C2008&param1=ZmRwLjNfOTIzNDgxMjNORQ==&unique=1677275414&session=2308fdac9eb7ada4dece373ad6d0f3d2&hostname=139.28.41.7	2	2.6875	1.375	51.1628	3	0	2	1	0	0	2	2.25	danger	19	15.3333
Acetone	67-64-1	organic	liquid	58.08	PANREAC QUIMICA S.L.U	2020-02-14	https://sds.chemicalsafety.com/sds/pda/msds/getpdf.ashx?action=msdsdocument&auth=200C200C200C200C2008207A200D2078200C200C200C200C200C200C200C200C200C2008&param1=ZmRwLjFfNjE5Nzg1MDNORQ==&unique=1676993358&session=23742bc2319efd3fb56ee581bcf57170&hostname=139.28.41.7	2				3	0	2	1	0	0	2		danger	6
Acetone	67-64-1	organic	liquid	58.08	Thermo Fisher	2020-02-14	https://sds.chemicalsafety.com/sds/pda/msds/getpdf.ashx?action=msdsdocument&auth=200C200C200C200C2008207A200D2078200C200C200C200C200C200C200C200C200C2008&param1=ZmRwLjFfNTYyODkyMTNORQ==&unique=1676993543&session=23742bc2319efd3fb56ee581bcf57170&hostname=139.28.41.7	4.75				6	2	3	1	0	0	3		danger	21			Where can I find SDS sheets to calculate missing CH values?									https://chemicalsafety.com/sds-search/
Acetone	67-64-1	organic	liquid	58.08	Shell Chemical LP	2022-08-05	https://sds.chemicalsafety.com/sds/pda/msds/getpdf.ashx?action=msdsdocument&auth=200C200C200C200C2008207A200D2078200C200C200C200C200C200C200C200C200C2008&param1=ZmRwLjFfNDQ0Njk1MDNORQ==&unique=1676993697&session=23742bc2319efd3fb56ee581bcf57170&hostname=139.28.41.7	2				3	0	2	1	0	0	2		danger
Amitriptyline hydrochloride	549-18-8	organic	solid	313.87	Sigma-Aldrich	2021-09-13	https://sds.chemicalsafety.com/sds/pda/msds/getpdf.ashx?action=msdsdocument&auth=200C200C200C200C2008207A200D2078200C200C200C200C200C200C200C200C200C2008&param1=ZmRwLjFfNjI5MzMwMDNORQ==&unique=1677066497&session=21623f89b354e08589e0ade18e06e2bb&hostname=139.28.41.7	1.25	2.3125	0.826009	35.7193	2	0	1	1	0	0	2	2.25	danger	9	10
Amitriptyline hydrochloride	549-18-8	organic	solid	313.87	Thermo Fisher	2020-02-19	https://sds.chemicalsafety.com/sds/pda/msds/getpdf.ashx?action=msdsdocument&auth=200C200C200C200C2008207A200D2078200C200C200C200C200C200C200C200C200C2008&param1=ZmRwLjFfODIxNjkyMTNORQ==&unique=1677066600&session=21623f89b354e08589e0ade18e06e2bb&hostname=139.28.41.7	3.25				4	2	1	1	0	0	2		danger	11
Amitriptyline hydrochloride	549-18-8	organic	solid	313.87	Combi-Blocks	2022-01-14	https://sds.chemicalsafety.com/sds/pda/msds/getpdf.ashx?action=msdsdocument&auth=200C200C200C200C2008207A200D2078200C200C200C200C200C200C200C200C200C2008&param1=ZmRwLjFfOTc1MzMxMjNORQ==&unique=1677066811&session=21623f89b354e08589e0ade18e06e2bb&hostname=139.28.41.7	2.25				3	1	1	1	0	0	2		danger	10
Amitriptyline hydrochloride	549-18-8	organic	solid	313.87	U. S. Pharmacopeia	2020-12-17	https://sds.chemicalsafety.com/sds/pda/msds/getpdf.ashx?action=msdsdocument&auth=200C200C200C200C2008207A200D2078200C200C200C200C200C200C200C200C200C2008&param1=ZmRwLjFfMDg5NjQ1MjNORQ==&unique=1677066870&session=21623f89b354e08589e0ade18e06e2bb&hostname=139.28.41.7	2.5				3	2	0	1	0	0	3		danger
Ammonium formate	540-69-2	organic	solid	63.06	Sigma-Aldrich	2021-10-27	https://sds.chemicalsafety.com/sds/pda/msds/getpdf.ashx?action=msdsdocument&auth=200C200C200C200C2008207A200D2078200C200C200C200C200C200C200C200C200C2008&param1=ZmRwLjFfMTY1MzgxMjNORQ==&unique=1677071302&session=6ea14deee4aa445e7572ca8b582550dc&hostname=139.28.41.7	0.75	1.8125	0.943729	52.0678	1	0	1	0	0	0	1	1	warning	4	10.3333
Ammonium formate	540-69-2	organic	solid	63.06	TCI America	2021-05-28	https://sds.chemicalsafety.com/sds/pda/msds/getpdf.ashx?action=msdsdocument&auth=200C200C200C200C2008207A200D2078200C200C200C200C200C200C200C200C200C2008&param1=ZmRwLjFfMzY0NzA1MjNORQ==&unique=1677071424&session=6ea14deee4aa445e7572ca8b582550dc&hostname=139.28.41.7	1.5				2	0	2	0	0	0	1		warning
Ammonium formate	540-69-2	organic	solid	63.06	Thermo Fisher	2020-02-14	https://sds.chemicalsafety.com/sds/pda/msds/getpdf.ashx?action=msdsdocument&auth=200C200C200C200C2008207A200D2078200C200C200C200C200C200C200C200C200C2008&param1=ZmRwLjFfMDQyMDAzMTNORQ==&unique=1677071551&session=6ea14deee4aa445e7572ca8b582550dc&hostname=139.28.41.7	3				4	1	2	1	0	0	1		warning	14
Ammonium formate	540-69-2	organic	solid	63.06	Combi-Blocks	2020-01-29	https://sds.chemicalsafety.com/sds/pda/msds/getpdf.ashx?action=msdsdocument&auth=200C200C200C200C2008207A200D2078200C200C200C200C200C200C200C200C200C2008&param1=ZmRwLjFfNjQ0NzUxMTNORQ==&unique=1677071635&session=6ea14deee4aa445e7572ca8b582550dc&hostname=139.28.41.7	2				3	0	2	1	0	0	1		warning	13
Azithromycin dihydrate	117772-70-0	organic	solid	785.02	Sigma-Aldrich	2022-04-26	https://sds.chemicalsafety.com/sds/pda/msds/getpdf.ashx?action=msdsdocument&auth=200C200C200C200C2008207A200D2078200C200C200C200C200C200C200C200C200C2008&param1=ZmRwLjFfODE4MDIyMjNORQ==&unique=1677073895&session=6ea14deee4aa445e7572ca8b582550dc&hostname=139.28.41.7	0	0.5625	1.125	200	0	0	0	0	0	0	0	0.25	none	0	3.75
Azithromycin dihydrate	117772-70-0	organic	solid	785.02	Thermo Fisher	2020-02-18	https://sds.chemicalsafety.com/sds/pda/msds/getpdf.ashx?action=msdsdocument&auth=200C200C200C200C2008207A200D2078200C200C200C200C200C200C200C200C200C2008&param1=ZmRwLjFfMTQ0ODkyMTNORQ==&unique=1677073977&session=6ea14deee4aa445e7572ca8b582550dc&hostname=139.28.41.7	0				0	0	0	0	0	0	0		none	0
Azithromycin dihydrate	117772-70-0	organic	solid	785.02	Combi-Blocks	2020-12-23	https://sds.chemicalsafety.com/sds/pda/msds/getpdf.ashx?action=msdsdocument&auth=200C200C200C200C2008207A200D2078200C200C200C200C200C200C200C200C200C2008&param1=ZmRwLjFfMjUxNDQxMTNORQ==&unique=1677074019&session=6ea14deee4aa445e7572ca8b582550dc&hostname=139.28.41.7	2.25				4	0	2	1	1	0	1		warning	15
Azithromycin dihydrate	117772-70-0	organic	solid	785.02	TCI America	2020-06-15	https://sds.chemicalsafety.com/sds/pda/msds/getpdf.ashx?action=msdsdocument&auth=200C200C200C200C2008207A200D2078200C200C200C200C200C200C200C200C200C2008&param1=ZmRwLjFfMTgzNTA1MjNORQ==&unique=1677074101&session=6ea14deee4aa445e7572ca8b582550dc&hostname=139.28.41.7	0				0	0	0	0	0	0	0		none	0
BSTFA	25561-30-2	organic	liquid	257.40	Sigma-Aldrich	2021-08-16	https://sds.chemicalsafety.com/sds/pda/msds/getpdf.ashx?action=msdsdocument&auth=200C200C200C200C2008207A200D2078200C200C200C200C200C200C200C200C200C2008&param1=ZmRwLjFfNzA2MzgxMjNORQ==&unique=1677150163&session=10158fc67466c96792c3f504b6473b73&hostname=139.28.41.7	2	1.625	1.10868	68.2263	3	0	2	1	0	0	2	1.5	warning	16	9.75
BSTFA	25561-30-2	organic	liquid	257.40	Thermo Fisher	2021-05-25	https://sds.chemicalsafety.com/sds/pda/msds/getpdf.ashx?action=msdsdocument&auth=200C200C200C200C2008207A200D2078200C200C200C200C200C200C200C200C200C2008&param1=ZmRwLjFfMDkzNzAzMTNORQ==&unique=1677150366&session=10158fc67466c96792c3f504b6473b73&hostname=139.28.41.7	2				3	0	2	1	0	0	2		warning	16
BSTFA	25561-30-2	organic	liquid	257.40	AppliChem GmbH	2021-01-20	https://sds.chemicalsafety.com/sds/pda/msds/getpdf.ashx?action=msdsdocument&auth=200C200C200C200C2008207A200D2078200C200C200C200C200C200C200C200C200C2008&param1=ZmRwLjFfMjI2Nzg1MDNORQ==&unique=1677150432&session=10158fc67466c96792c3f504b6473b73&hostname=139.28.41.7	2.5				3	2	0	1	0	0	2		danger	7
BSTFA	25561-30-2	organic	liquid	257.40	Combi-Blocks	2020-11-30	https://sds.chemicalsafety.com/sds/pda/msds/getpdf.ashx?action=msdsdocument&auth=200C200C200C200C2008207A200D2078200C200C200C200C200C200C200C200C200C2008&param1=ZmRwLjFfODI1NzcxMTNORQ==&unique=1677150512&session=10158fc67466c96792c3f504b6473b73&hostname=139.28.41.7	0				0	0	0	0	0	0	0		none	0
Caffeine	58-08-2	organic	solid	194.19	Sigma-Aldrich	2021-06-07	https://sds.chemicalsafety.com/sds/pda/msds/getpdf.ashx?action=msdsdocument&auth=200C200C200C200C2008207A200D2078200C200C200C200C200C200C200C200C200C2008&param1=ZmRwLjFfNTI1OTE0MDNORQ==&unique=1677151617&session=10158fc67466c96792c3f504b6473b73&hostname=139.28.41.7	0.75	0.5	0.288675	57.735	2	0	0	1	1	0	1	1	warning	5	5
Caffeine	58-08-2	organic	solid	194.19	PANREAC QUIMICA S.L.U.	2021-04-28	https://sds.chemicalsafety.com/sds/pda/msds/getpdf.ashx?action=msdsdocument&auth=200C200C200C200C2008207A200D2078200C200C200C200C200C200C200C200C200C2008&param1=ZmRwLjFfNDYyNzg1MDNORQ==&unique=1677151740&session=10158fc67466c96792c3f504b6473b73&hostname=139.28.41.7	0.25				1	0	0	0	1	0	1		warning	5
Caffeine	58-08-2	organic	solid	194.19	Thermo Fisher	2022-06-09	https://sds.chemicalsafety.com/sds/pda/msds/getpdf.ashx?action=msdsdocument&auth=200C200C200C200C2008207A200D2078200C200C200C200C200C200C200C200C200C2008&param1=ZmRwLjFfMDk1MDAzMTNORQ==&unique=1677151803&session=10158fc67466c96792c3f504b6473b73&hostname=139.28.41.7	0.25				1	0	0	0	1	0	1		warning	5
Caffeine	58-08-2	organic	solid	194.19	U. S. Pharmacopeia	2021-12-07	https://sds.chemicalsafety.com/sds/pda/msds/getpdf.ashx?action=msdsdocument&auth=200C200C200C200C2008207A200D2078200C200C200C200C200C200C200C200C200C2008&param1=ZmRwLjFfMjc0NTQ1MjNORQ==&unique=1677151871&session=10158fc67466c96792c3f504b6473b73&hostname=139.28.41.7	0.75				2	0	0	1	1	0	1		danger
Cypermethrin	52315-07-8	organic	solid	416.30	Sigma-Aldrich	2022-10-29	https://sds.chemicalsafety.com/sds/pda/msds/getpdf.ashx?action=msdsdocument&auth=200C200C200C200C2008207A200D2078200C200C200C200C200C200C200C200C200C2008&param1=ZmRwLjFfOTEzNjMwMDNORQ==&unique=1677498514&session=49305c2cf7bf8e5ab1ba6b83c8fc70df&hostname=139.28.41.7	5.75	4.1875	1.66302	39.7138	8	3	2	2	1	0	4	2.75	danger	17	19
Cypermethrin	52315-07-8	organic	solid	416.30	Combi-Blocks	2021-01-27	https://sds.chemicalsafety.com/sds/pda/msds/getpdf.ashx?action=msdsdocument&auth=200C200C200C200C2008207A200D2078200C200C200C200C200C200C200C200C200C2008&param1=ZmRwLjFfNTQxMzIxMTNORQ==&unique=1677498663&session=49305c2cf7bf8e5ab1ba6b83c8fc70df&hostname=139.28.41.7	2.75				6	0	2	1	3	0	2		danger	21
Cypermethrin	52315-07-8	organic	solid	416.3	Sigma-Aldrich	2022-12-21	https://sds.chemicalsafety.com/sds/pda/msds/getpdf.ashx?action=msdsdocument&auth=200C200C200C200C2008207A200D2078200C200C200C200C200C200C200C200C200C2008&param1=ZmRwLjFfNTk3MzMzMjNORQ==&unique=1677535671&session=196cbe312fdaa5177aa60b1a0780f7ae&hostname=78.8.217.118	5.5				8	3	2	1	2	0	3		warning	17
Cypermethrin	52315-07-8	organic	solid	416.3	Combi-Blocks	2021-01-27	https://sds.chemicalsafety.com/sds/pda/msds/getpdf.ashx?action=msdsdocument&auth=200C200C200C200C2008207A200D2078200C200C200C200C200C200C200C200C200C2008&param1=ZmRwLjFfNTQxMzIxMTNORQ==&unique=1677535671&session=196cbe312fdaa5177aa60b1a0780f7ae&hostname=78.8.217.118	2.75				6	0	2	1	3	0	2		danger	21
Ethyl vanillin	121-32-4	organic	solid	166.17	Sigma-Aldrich	2022-03-10	https://sds.chemicalsafety.com/sds/pda/msds/getpdf.ashx?action=msdsdocument&auth=200C200C200C200C2008207A200D2078200C200C200C200C200C200C200C200C200C2008&param1=ZmRwLjFfNzY4NDgxMjNORQ==&unique=1677583142&session=2769514b688cb754cd0d8f1507d36947&hostname=139.28.41.7	1.25	1.3125	0.657489	50.0944	2	0	1	1	0	0	1	0.75	warning	6	9.66667
Ethyl vanillin	121-32-4	organic	solid	166.17	Thermo Fisher	2020-02-14	https://sds.chemicalsafety.com/sds/pda/msds/getpdf.ashx?action=msdsdocument&auth=200C200C200C200C2008207A200D2078200C200C200C200C200C200C200C200C200C2008&param1=ZmRwLjFfMTA2MzkyMTNORQ==&unique=1677583238&session=2769514b688cb754cd0d8f1507d36947&hostname=139.28.41.7	1				2	0	1	0	1	0	1		warning	8
Ethyl vanillin	121-32-4	organic	solid	166.17	Combi-Blocks	2023-01-02	https://sds.chemicalsafety.com/sds/pda/msds/getpdf.ashx?action=msdsdocument&auth=200C200C200C200C2008207A200D2078200C200C200C200C200C200C200C200C200C2008&param1=ZmRwLjFfMDUyMjYxMTNORQ==&unique=1677583297&session=2769514b688cb754cd0d8f1507d36947&hostname=139.28.41.7	2.25				4	0	2	1	1	0	1		warning	15
Ethyl vanillin	121-32-4	organic	solid	166.17	U. S. Pharmacopeia	2022-10-20	https://sds.chemicalsafety.com/sds/pda/msds/getpdf.ashx?action=msdsdocument&auth=200C200C200C200C2008207A200D2078200C200C200C200C200C200C200C200C200C2008&param1=ZmRwLjFfNTU0NjQ1MjNORQ==&unique=1677583379&session=2769514b688cb754cd0d8f1507d36947&hostname=139.28.41.7	0.75				1	0	1	0	0	0	0		warning
Ethylene glycol	107-21-1	organic	liquid	62.07	Sigma-Aldrich	2022-10-29	https://sds.chemicalsafety.com/sds/pda/msds/getpdf.ashx?action=msdsdocument&auth=200C200C200C200C2008207A200D2078200C200C200C200C200C200C200C200C200C2008&param1=ZmRwLjFfMDcxMjg2MDNORQ==&unique=1677583897&session=2769514b688cb754cd0d8f1507d36947&hostname=139.28.41.7	1	1.25	1.5411	123.288	2	0	1	0	1	0	2	1.5	warning	6	6.75
Ethylene glycol	107-21-1	organic	liquid	62.07	Thermo Fisher	2020-02-14	https://sds.chemicalsafety.com/sds/pda/msds/getpdf.ashx?action=msdsdocument&auth=200C200C200C200C2008207A200D2078200C200C200C200C200C200C200C200C200C2008&param1=ZmRwLjFfNDQ1NDAzMTNORQ==&unique=1677583995&session=2769514b688cb754cd0d8f1507d36947&hostname=139.28.41.7	3.5				5	2	1	1	1	0	2		warning	12
Ethylene glycol	107-21-1	organic	liquid	62.07	PANREAC QUIMICA S.L.U.	2020-11-26	https://sds.chemicalsafety.com/sds/pda/msds/getpdf.ashx?action=msdsdocument&auth=200C200C200C200C2008207A200D2078200C200C200C200C200C200C200C200C200C2008&param1=ZmRwLjFfMTIzNjg1MDNORQ==&unique=1677584080&session=2769514b688cb754cd0d8f1507d36947&hostname=139.28.41.7	0.25				1	0	0	0	1	0	1		warning	5
Ethylene glycol	107-21-1	organic	liquid	62.07	Combi-Blocks	2023-01-02	https://sds.chemicalsafety.com/sds/pda/msds/getpdf.ashx?action=msdsdocument&auth=200C200C200C200C2008207A200D2078200C200C200C200C200C200C200C200C200C2008&param1=ZmRwLjFfMzg2NDYxMTNORQ==&unique=1677584144&session=2769514b688cb754cd0d8f1507d36947&hostname=139.28.41.7	0.25				1	0	0	0	1	0	1		warning	4
Ferric chloride hexahydrate	10025-77-1	inorganic	solid	270.30	Sigma-Aldrich	2022-09-14	https://sds.chemicalsafety.com/sds/pda/msds/getpdf.ashx?action=msdsdocument&auth=200C200C200C200C2008207A200D2078200C200C200C200C200C200C200C200C200C2008&param1=ZmRwLjFfMzIyMjYwMDNORQ==&unique=1677618101&session=2769514b688cb754cd0d8f1507d36947&hostname=139.28.41.7	2.75	2.375	0.595119	25.0576	4	1	2	0	1	0	2	2	danger	10	9.75
Ferric chloride hexahydrate	10025-77-1	inorganic	solid	270.30	Thermo Fisher	2023-01-30	https://sds.chemicalsafety.com/sds/pda/msds/getpdf.ashx?action=msdsdocument&auth=200C200C200C200C2008207A200D2078200C200C200C200C200C200C200C200C200C2008&param1=ZmRwLjFfNTU3NTAzMTNORQ==&unique=1677618232&session=2769514b688cb754cd0d8f1507d36947&hostname=139.28.41.7	2				3	1	1	0	1	0	2		danger	11
Ferric chloride hexahydrate	10025-77-1	inorganic	solid	270.30	AppliChem GmbH	2020-05-27	https://sds.chemicalsafety.com/sds/pda/msds/getpdf.ashx?action=msdsdocument&auth=200C200C200C200C2008207A200D2078200C200C200C200C200C200C200C200C200C2008&param1=ZmRwLjFfNTQ3Nzg1MDNORQ==&unique=1677618295&session=2769514b688cb754cd0d8f1507d36947&hostname=139.28.41.7	1.75				3	1	0	1	1	0	2		danger	7
Ferric chloride hexahydrate	10025-77-1	inorganic	solid	270.30	Combi-Blocks	2023-01-02	https://sds.chemicalsafety.com/sds/pda/msds/getpdf.ashx?action=msdsdocument&auth=200C200C200C200C2008207A200D2078200C200C200C200C200C200C200C200C200C2008&param1=ZmRwLjFfNTM4NjUxMTNORQ==&unique=1677618363&session=2769514b688cb754cd0d8f1507d36947&hostname=139.28.41.7	3				4	2	1	0	1	0	2		danger	11
Isoamyl alcohol	123-51-3	organic	liquid	88.15	Sigma-Aldrich	2021-08-06	https://sds.chemicalsafety.com/sds/pda/msds/getpdf.ashx?action=msdsdocument&auth=200C200C200C200C2008207A200D2078200C200C200C200C200C200C200C200C200C2008&param1=ZmRwLjFfNDQyMzMwMDNORQ==&unique=1677667973&session=cee9c3e3124a7c78e3d61a62e6a5f1a2&hostname=139.28.41.7	3	3.0625	0.473242	15.4528	5	1	1	2	1	0	3	2.25	danger	20	17.25
Isoamyl alcohol	123-51-3	organic	liquid	88.15	Thermo Fisher	2020-02-14	https://sds.chemicalsafety.com/sds/pda/msds/getpdf.ashx?action=msdsdocument&auth=200C200C200C200C2008207A200D2078200C200C200C200C200C200C200C200C200C2008&param1=ZmRwLjFfMTA3MzkyMTNORQ==&unique=1677668082&session=cee9c3e3124a7c78e3d61a62e6a5f1a2&hostname=139.28.41.7	3.75				6	1	2	2	1	0	2		warning	23
Isoamyl alcohol	123-51-3	organic	liquid	88.15	Combi-Blocks	2023-01-02	https://sds.chemicalsafety.com/sds/pda/msds/getpdf.ashx?action=msdsdocument&auth=200C200C200C200C2008207A200D2078200C200C200C200C200C200C200C200C200C2008&param1=ZmRwLjFfNjkyNDUxMTNORQ==&unique=1677668141&session=cee9c3e3124a7c78e3d61a62e6a5f1a2&hostname=139.28.41.7	2.75				5	0	2	2	1	0	2		warning	20
Isoamyl alcohol	123-51-3	organic	liquid	88.15	PANREAC QUIMICA	2020-04-29	https://sds.chemicalsafety.com/sds/pda/msds/getpdf.ashx?action=msdsdocument&auth=200C200C200C200C2008207A200D2078200C200C200C200C200C200C200C200C200C2008&param1=ZmRwLjFfMDY3Nzg1MDNORQ==&unique=1677668208&session=cee9c3e3124a7c78e3d61a62e6a5f1a2&hostname=139.28.41.7	2.75				5	0	2	2	1	0	2		warning	6
Methanol	67-56-1	organic	liquid	32.04	Avantor Performance Materials	2020-05-18	https://sds.chemicalsafety.com/sds/pda/msds/getpdf.ashx?action=msdsdocument&auth=200C200C200C200C2008207A200D2078200C200C200C200C200C200C200C200C200C2008&param1=ZmRwLjFfNTU2MTkxMDNORQ==&unique=1676928699&session=9c1a704466e3bae6447bfa7b329f5889&hostname=78.8.217.118	6.5	4.8125	1.8071	37.5502	9	2	4	3	0	0	3	3	danger		17.6667
Methanol	67-56-1	organic	liquid	32.04	PANREAC QUIMICA S.L.U.	2020-02-18	https://sds.chemicalsafety.com/sds/pda/msds/getpdf.ashx?action=msdsdocument&auth=200C200C200C200C2008207A200D2078200C200C200C200C200C200C200C200C200C2008&param1=ZmRwLjFfNTU3Nzg1MDNORQ==&unique=1676928706&session=9c1a704466e3bae6447bfa7b329f5889&hostname=78.8.217.118	3.25				5	1	1	3	0	0	3		danger	8
Methanol	67-56-1	organic	liquid	32.04	Sigma-Aldrich	2021-09-13	https://sds.chemicalsafety.com/sds/pda/msds/getpdf.ashx?action=msdsdocument&auth=200C200C200C200C2008207A200D2078200C200C200C200C200C200C200C200C200C2008&param1=ZmRwLjIxXzQxODU4MTIzTkU=&unique=1676928717&session=9c1a704466e3bae6447bfa7b329f5889&hostname=78.8.217.118	3.25				5	1	1	3	0	0	3		danger	21
Methanol	67-56-1	organic	liquid	32.04	Thermo Fisher	2020-02-14	https://sds.chemicalsafety.com/sds/pda/msds/getpdf.ashx?action=msdsdocument&auth=200C200C200C200C2008207A200D2078200C200C200C200C200C200C200C200C200C2008&param1=ZmRwLjFfNDQ2MjAzMTNORQ==&unique=1676928719&session=9c1a704466e3bae6447bfa7b329f5889&hostname=78.8.217.118	6.25				8	4	1	3	0	0	3		danger	24
Phenol	108-95-2	organic	solid	94.11	Sigma-Aldrich	2021-10-27	https://sds.chemicalsafety.com/sds/pda/msds/getpdf.ashx?action=msdsdocument&auth=200C200C200C200C2008207A200D2078200C200C200C200C200C200C200C200C200C2008&param1=ZmRwLjFfOTAwNDgxMjNORQ==&unique=1677017266&session=7e72ee6b9a74e6f21cae92cd484df72a&hostname=78.8.217.118	6.5	6.625	1.18145	17.8333	9	2	4	3	0	0	4	3.25	danger	19	18
Phenol	108-95-2	organic	solid	94.11	Thermo Fisher	2020-02-14	https://sds.chemicalsafety.com/sds/pda/msds/getpdf.ashx?action=msdsdocument&auth=200C200C200C200C2008207A200D2078200C200C200C200C200C200C200C200C200C2008&param1=ZmRwLjFfNDU5NDAzMTNORQ==&unique=1677017277&session=7e72ee6b9a74e6f21cae92cd484df72a&hostname=78.8.217.118	7.5				10	4	2	4	0	0	3		danger	17
Phenol	108-95-2	organic	solid	94.11	TCI America	2020-06-15	https://sds.chemicalsafety.com/sds/pda/msds/getpdf.ashx?action=msdsdocument&auth=200C200C200C200C2008207A200D2078200C200C200C200C200C200C200C200C200C2008&param1=ZmRwLjFfNzIyODA1MjNORQ==&unique=1677017281&session=7e72ee6b9a74e6f21cae92cd484df72a&hostname=78.8.217.118	7.5				9	6	1	1	1	0	3		danger
Phenol	108-95-2	organic	solid	94.11	U. S. Pharmacopeia	2020-06-01	https://sds.chemicalsafety.com/sds/pda/msds/getpdf.ashx?action=msdsdocument&auth=200C200C200C200C2008207A200D2078200C200C200C200C200C200C200C200C200C2008&param1=ZmRwLjFfNDgyODQ1MjNORQ==&unique=1677017285&session=7e72ee6b9a74e6f21cae92cd484df72a&hostname=78.8.217.118	5				7	2	2	3	0	0	3		danger
Sodium chloride	7647-14-5	inorganic	solid	58.44	Sigma-Aldrich	2022-03-26	https://sds.chemicalsafety.com/sds/pda/msds/getpdf.ashx?action=msdsdocument&auth=200C200C200C200C2008207A200D2078200C200C200C200C200C200C200C200C200C2008&param1=ZmRwLjFfOTQ2NzgxMjNORQ==&unique=1677160863&session=6365fb7a9edc69f8e4517c7c8da680ed&hostname=78.8.217.118	0	0.375	0.433013	115.47	0	0	0	0	0	0	0	0.5	none	0	0
Sodium chloride	7647-14-5	inorganic	solid	58.44	AppliChem	2021-02-03	https://sds.chemicalsafety.com/sds/pda/msds/getpdf.ashx?action=msdsdocument&auth=200C200C200C200C2008207A200D2078200C200C200C200C200C200C200C200C200C2008&param1=ZmRwLjFfMzg2Nzg1MDNORQ==&unique=1677160867&session=6365fb7a9edc69f8e4517c7c8da680ed&hostname=78.8.217.118	0				0	0	0	0	0	0	0		none	0
Sodium chloride	7647-14-5	inorganic	solid	58.44	Avantor Performance Materials	2020-01-18	https://sds.chemicalsafety.com/sds/pda/msds/getpdf.ashx?action=msdsdocument&auth=200C200C200C200C2008207A200D2078200C200C200C200C200C200C200C200C200C2008&param1=ZmRwLjFfMjY0MjkxMDNORQ==&unique=1677160869&session=6365fb7a9edc69f8e4517c7c8da680ed&hostname=78.8.217.118	0.75				1	0	1	0	0	0	1		warning
Sodium chloride	7647-14-5	inorganic	solid	58.44	U. S. Pharmacopeia	2022-07-26	https://sds.chemicalsafety.com/sds/pda/msds/getpdf.ashx?action=msdsdocument&auth=200C200C200C200C2008207A200D2078200C200C200C200C200C200C200C200C200C2008&param1=ZmRwLjFfNzMxODQ1MjNORQ==&unique=1677160917&session=6365fb7a9edc69f8e4517c7c8da680ed&hostname=78.8.217.118	0.75				1	0	1	0	0	0	1		warning
Toluene	108-88-3	organic	liquid	92.14	Sigma-Aldrich	2022-10-19	https://sds.chemicalsafety.com/sds/pda/msds/getpdf.ashx?action=msdsdocument&auth=200C200C200C200C2008207A200D2078200C200C200C200C200C200C200C200C200C2008&param1=ZmRwLjNfODA4NjgwMDNORQ==&unique=1677439489&session=bdf11b8600b42b0c2a10febd77821c6b&hostname=78.8.217.118	5.75	6.125	1.10868	18.1009	8	1	5	2	0	0	3	3	danger	25	22.25
Toluene	108-88-3	organic	liquid	92.14	Thermo Fisher	2020-02-14	https://sds.chemicalsafety.com/sds/pda/msds/getpdf.ashx?action=msdsdocument&auth=200C200C200C200C2008207A200D2078200C200C200C200C200C200C200C200C200C2008&param1=ZmRwLjFfMDc5NjAzMTNORQ==&unique=1677439490&session=bdf11b8600b42b0c2a10febd77821c6b&hostname=78.8.217.118	7.25				9	3	5	1	0	0	3		danger	27
Toluene	108-88-3	organic	liquid	92.14	PANREAC QUIMICA	2020-07-15	https://sds.chemicalsafety.com/sds/pda/msds/getpdf.ashx?action=msdsdocument&auth=200C200C200C200C2008207A200D2078200C200C200C200C200C200C200C200C200C2008&param1=ZmRwLjFfNDA5Nzg1MDNORQ==&unique=1677439482&session=bdf11b8600b42b0c2a10febd77821c6b&hostname=78.8.217.118	4.75				7	1	4	1	1	0	3		danger	8
Toluene	108-88-3	organic	liquid	92.14	Linde Inc	2022-10-11	https://sds.chemicalsafety.com/sds/pda/msds/getpdf.ashx?action=msdsdocument&auth=200C200C200C200C2008207A200D2078200C200C200C200C200C200C200C200C200C2008&param1=ZmRwLjFfODA0ODQ1MjNORQ==&unique=1677439474&session=bdf11b8600b42b0c2a10febd77821c6b&hostname=78.8.217.118	6.75				10	1	6	2	1	0	3		danger	29
Polyvinylpyrrolidone	9003-39-8	organic	solid	333.4	Sigma-Aldrich	2022-04-23	https://sds.chemicalsafety.com/sds/pda/msds/getpdf.ashx?action=msdsdocument&auth=200C200C200C200C2008207A200D2078200C200C200C200C200C200C200C200C200C2008&param1=ZmRwLjFfNjEyMjI0MDNORQ==&unique=1677598460&session=2c544a1300c519092899afa4112f269c&hostname=78.8.217.118	0	0	0	0	0	0	0	0	0	0	0	0	none	0	0.25
Polyvinylpyrrolidone	9003-39-8	organic	solid	333.4	Thermo Fisher	2020-02-14	https://sds.chemicalsafety.com/sds/pda/msds/getpdf.ashx?action=msdsdocument&auth=200C200C200C200C2008207A200D2078200C200C200C200C200C200C200C200C200C2008&param1=ZmRwLjFfMzE2NTAzMTNORQ==&unique=1677598462&session=2c544a1300c519092899afa4112f269c&hostname=78.8.217.118	0				0	0	0	0	0	0	0		warning	1
Polyvinylpyrrolidone	9003-39-8	organic	solid	333.4	Combi-Blocks	2021-01-27	https://sds.chemicalsafety.com/sds/pda/msds/getpdf.ashx?action=msdsdocument&auth=200C200C200C200C2008207A200D2078200C200C200C200C200C200C200C200C200C2008&param1=ZmRwLjFfNTQ3NDYxMTNORQ==&unique=1677598456&session=2c544a1300c519092899afa4112f269c&hostname=78.8.217.118	0				0	0	0	0	0	0	0		none	0
Polyvinylpyrrolidone	9003-39-8	organic	solid	333.4	Bio-Rad Laboratories	2020-08-19	https://sds.chemicalsafety.com/sds/pda/msds/getpdf.ashx?action=msdsdocument&auth=200C200C200C200C2008207A200D2078200C200C200C200C200C200C200C200C200C2008&param1=ZmRwLjFfMjk3ODI5MDNORQ==&unique=1677598449&session=2c544a1300c519092899afa4112f269c&hostname=78.8.217.118	0				0	0	0	0	0	0	0		none	0
Ethylenediamine	107-15-3	organic	liquid	60.10	Sigma-Aldrich	2022-10-19	https://sds.chemicalsafety.com/sds/pda/msds/getpdf.ashx?action=msdsdocument&auth=200C200C200C200C2008207A200D2078200C200C200C200C200C200C200C200C200C2008&param1=ZmRwLjFfNzQ2MDYwMDNORQ==&unique=1677950649&session=0e1da735f43fe643971f4dc37256385c&hostname=78.8.217.118	6.5	5.875	1.03078	17.5451	10	4	0	4	2	0	4	4	danger	26	22
Ethylenediamine	107-15-3	organic	liquid	60.10	Combi-Blocks	2023-01-02	https://sds.chemicalsafety.com/sds/pda/msds/getpdf.ashx?action=msdsdocument&auth=200C200C200C200C2008207A200D2078200C200C200C200C200C200C200C200C200C2008&param1=ZmRwLjFfNDM2NzUxMTNORQ==&unique=1677950654&session=0e1da735f43fe643971f4dc37256385c&hostname=78.8.217.118	5				8	3	0	3	2	0	4		danger	27
Ethylenediamine	107-15-3	organic	liquid	60.10	PANREAC QUIMICA	2020-10-29	https://sds.chemicalsafety.com/sds/pda/msds/getpdf.ashx?action=msdsdocument&auth=200C200C200C200C2008207A200D2078200C200C200C200C200C200C200C200C200C2008&param1=ZmRwLjFfMjk5Nzg1MDNORQ==&unique=1677950655&session=0e1da735f43fe643971f4dc37256385c&hostname=78.8.217.118	5				8	3	0	3	2	0	4		danger	9
Ethylenediamine	107-15-3	organic	liquid	60.10	Thermo Fisher	2020-02-14	https://sds.chemicalsafety.com/sds/pda/msds/getpdf.ashx?action=msdsdocument&auth=200C200C200C200C2008207A200D2078200C200C200C200C200C200C200C200C200C2008&param1=ZmRwLjFfMzQxNDAzMTNORQ==&unique=1677950667&session=0e1da735f43fe643971f4dc37256385c&hostname=78.8.217.118	7				10	5	0	3	2	0	4		danger	26
Copper(II) sulfate pentahydrate	7758-99-8	inorganic	solid	249.69	Sigma-Aldrich	2021-10-03	https://sds.chemicalsafety.com/sds/pda/msds/getpdf.ashx?action=msdsdocument&auth=200C200C200C200C2008207A200D2078200C200C200C200C200C200C200C200C200C2008&param1=ZmRwLjJfNDgwMjAyMjNORQ==&unique=1677951726&session=0e1da735f43fe643971f4dc37256385c&hostname=78.8.217.118	3.25	2.625	0.946485	36.0566	4	3	0	0	1	0	3	2.5	danger	8	8.5
Copper(II) sulfate pentahydrate	7758-99-8	inorganic	solid	249.69	Thermo Fisher	2022-07-18	https://sds.chemicalsafety.com/sds/pda/msds/getpdf.ashx?action=msdsdocument&auth=200C200C200C200C2008207A200D2078200C200C200C200C200C200C200C200C200C2008&param1=ZmRwLjFfOTkyMDAzMTNORQ==&unique=1677951727&session=0e1da735f43fe643971f4dc37256385c&hostname=78.8.217.118	1.25				2	1	0	0	1	0	2		danger	8
Copper(II) sulfate pentahydrate	7758-99-8	inorganic	solid	249.69	Combi-Blocks	2023-01-02	https://sds.chemicalsafety.com/sds/pda/msds/getpdf.ashx?action=msdsdocument&auth=200C200C200C200C2008207A200D2078200C200C200C200C200C200C200C200C200C2008&param1=ZmRwLjFfNjM3NjUxMTNORQ==&unique=1677951713&session=0e1da735f43fe643971f4dc37256385c&hostname=78.8.217.118	2.75				4	1	2	0	1	0	2		warning	12
Copper(II) sulfate pentahydrate	7758-99-8	inorganic	solid	249.69	PANREAC QUIMICA	2020-07-03	https://sds.chemicalsafety.com/sds/pda/msds/getpdf.ashx?action=msdsdocument&auth=200C200C200C200C2008207A200D2078200C200C200C200C200C200C200C200C200C2008&param1=ZmRwLjFfOTIzNzg1MDNORQ==&unique=1677951715&session=0e1da735f43fe643971f4dc37256385c&hostname=78.8.217.118	3.25				4	3	0	0	1	0	3		danger	6
Imidazole	288-32-4	organic	solid	68.08	Sigma-Aldrich	2021-09-16	https://sds.chemicalsafety.com/sds/pda/msds/getpdf.ashx?action=msdsdocument&auth=200C200C200C200C2008207A200D2078200C200C200C200C200C200C200C200C200C2008&param1=ZmRwLjNfNjcwMjYwMDNORQ==&unique=1677952052&session=0e1da735f43fe643971f4dc37256385c&hostname=78.8.217.118	3.25	3.1875	1.44878	45.4519	4	3	0	0	1	0	3	2.75	danger	15	14.3333
Imidazole	288-32-4	organic	solid	68.08	Thermo Fisher	2020-02-14	https://sds.chemicalsafety.com/sds/pda/msds/getpdf.ashx?action=msdsdocument&auth=200C200C200C200C2008207A200D2078200C200C200C200C200C200C200C200C200C2008&param1=ZmRwLjFfNzExMTAzMTNORQ==&unique=1677952054&session=0e1da735f43fe643971f4dc37256385c&hostname=78.8.217.118	4.75				6	4	0	1	1	0	3		danger	17
Imidazole	288-32-4	organic	solid	68.08	Combi-Blocks	2023-01-02	https://sds.chemicalsafety.com/sds/pda/msds/getpdf.ashx?action=msdsdocument&auth=200C200C200C200C2008207A200D2078200C200C200C200C200C200C200C200C200C2008&param1=ZmRwLjFfNDA4MjkwMTNORQ==&unique=1677952043&session=0e1da735f43fe643971f4dc37256385c&hostname=78.8.217.118	1.25				2	1	0	0	1	0	2		danger	11
Imidazole	288-32-4	organic	solid	68.08	U. S. Pharmacopeia	2021-01-27	https://sds.chemicalsafety.com/sds/pda/msds/getpdf.ashx?action=msdsdocument&auth=200C200C200C200C2008207A200D2078200C200C200C200C200C200C200C200C200C2008&param1=ZmRwLjFfNzYxNjQ1MjNORQ==&unique=1677952056&session=0e1da735f43fe643971f4dc37256385c&hostname=78.8.217.118	3.5				4	3	0	1	0	0	3		danger
Manganese(II) sulfate monohydrate	10034-96-5	inorganic	solid	169.02	Sigma-Aldrich	2021-10-02	https://sds.chemicalsafety.com/sds/pda/msds/getpdf.ashx?action=msdsdocument&auth=200C200C200C200C2008207A200D2078200C200C200C200C200C200C200C200C200C2008&param1=ZmRwLjJfMDkwMzYwMDNORQ==&unique=1677952443&session=0e1da735f43fe643971f4dc37256385c&hostname=78.8.217.118	3	3.375	2.02587	60.0259	4	1	2	1	0	0	3	2.75	danger	7	6
Manganese(II) sulfate monohydrate	10034-96-5	inorganic	solid	169.02	Thermo Fisher	2020-03-02	https://sds.chemicalsafety.com/sds/pda/msds/getpdf.ashx?action=msdsdocument&auth=200C200C200C200C2008207A200D2078200C200C200C200C200C200C200C200C200C2008&param1=ZmRwLjFfNTMzMjAzMTNORQ==&unique=1677952444&session=0e1da735f43fe643971f4dc37256385c&hostname=78.8.217.118	2.75				3	2	1	0	0	0	2		danger	6
Manganese(II) sulfate monohydrate	10034-96-5	inorganic	solid	169.02	Combi-Blocks	2023-01-02	https://sds.chemicalsafety.com/sds/pda/msds/getpdf.ashx?action=msdsdocument&auth=200C200C200C200C2008207A200D2078200C200C200C200C200C200C200C200C200C2008&param1=ZmRwLjFfMjI4MjYxMTNORQ==&unique=1677952438&session=0e1da735f43fe643971f4dc37256385c&hostname=78.8.217.118	1.5				2	0	2	0	0	0	2		warning	5
Manganese(II) sulfate monohydrate	10034-96-5	inorganic	solid	169.02	TCI America	2022-03-16	https://sds.chemicalsafety.com/sds/pda/msds/getpdf.ashx?action=msdsdocument&auth=200C200C200C200C2008207A200D2078200C200C200C200C200C200C200C200C200C2008&param1=ZmRwLjFfNTI4NzA1MjNORQ==&unique=1677952447&session=0e1da735f43fe643971f4dc37256385c&hostname=78.8.217.118	6.25				8	3	4	0	1	0	4		danger
Boric acid	10043-35-3	inorganic	solid	61.83	Sigma-Aldrich	2022-11-08	https://sds.chemicalsafety.com/sds/pda/msds/getpdf.ashx?action=msdsdocument&auth=200C200C200C200C2008207A200D2078200C200C200C200C200C200C200C200C200C2008&param1=ZmRwLjJfMTg5NjgxMjNORQ==&unique=1677952838&session=0e1da735f43fe643971f4dc37256385c&hostname=78.8.217.118	1.5	1.0625	0.773924	72.8399	2	1	0	1	0	0	1	1	danger	7	4.66667
Boric acid	10043-35-3	inorganic	solid	61.83	Thermo Fisher	2020-02-14	https://sds.chemicalsafety.com/sds/pda/msds/getpdf.ashx?action=msdsdocument&auth=200C200C200C200C2008207A200D2078200C200C200C200C200C200C200C200C200C2008&param1=ZmRwLjJfNTY3MDAzMTNORQ==&unique=1677952841&session=0e1da735f43fe643971f4dc37256385c&hostname=78.8.217.118	1				1	1	0	0	0	0	1		danger	7
Boric acid	10043-35-3	inorganic	solid	61.83	Combi-Blocks	2023-01-02	https://sds.chemicalsafety.com/sds/pda/msds/getpdf.ashx?action=msdsdocument&auth=200C200C200C200C2008207A200D2078200C200C200C200C200C200C200C200C200C2008&param1=ZmRwLjFfOTM1NjIxMTNORQ==&unique=1677952830&session=0e1da735f43fe643971f4dc37256385c&hostname=78.8.217.118	0				0	0	0	0	0	0	0		none	0
Boric acid	10043-35-3	inorganic	solid	61.83	U. S. Pharmacopeia	2020-01-08	https://sds.chemicalsafety.com/sds/pda/msds/getpdf.ashx?action=msdsdocument&auth=200C200C200C200C2008207A200D2078200C200C200C200C200C200C200C200C200C2008&param1=ZmRwLjFfMzY1NTQ1MjNORQ==&unique=1677952844&session=0e1da735f43fe643971f4dc37256385c&hostname=78.8.217.118	1.75				2	1	1	0	0	0	2		danger
Benzoic acid	65-85-0	organic	solid, DES component	122.12	Sigma-Aldrich	2021-09-18	https://sds.chemicalsafety.com/sds/pda/msds/getpdf.ashx?action=msdsdocument&auth=200C200C200C200C2008207A200D2078200C200C200C200C200C200C200C200C200C2008&param1=ZmRwLjFfNjIwMTk2MDNORQ==&unique=1677953156&session=0e1da735f43fe643971f4dc37256385c&hostname=78.8.217.118	3.25	3.125	0.478714	15.3188	4	2	1	1	0	0	2	2.25	danger	11	9.75
Benzoic acid	65-85-0	organic	solid, DES component	122.12	Thermo Fisher	2020-02-14	https://sds.chemicalsafety.com/sds/pda/msds/getpdf.ashx?action=msdsdocument&auth=200C200C200C200C2008207A200D2078200C200C200C200C200C200C200C200C200C2008&param1=ZmRwLjFfNjk4NzkyMTNORQ==&unique=1677953157&session=0e1da735f43fe643971f4dc37256385c&hostname=78.8.217.118	3.75				4	3	1	0	0	0	2		danger	12
Benzoic acid	65-85-0	organic	solid, DES component	122.12	Combi-Blocks	2023-01-02	https://sds.chemicalsafety.com/sds/pda/msds/getpdf.ashx?action=msdsdocument&auth=200C200C200C200C2008207A200D2078200C200C200C200C200C200C200C200C200C2008&param1=ZmRwLjFfMTU2NzUxMTNORQ==&unique=1677953136&session=0e1da735f43fe643971f4dc37256385c&hostname=78.8.217.118	2.75				3	2	1	0	0	0	3		danger	10
Benzoic acid	65-85-0	organic	solid, DES component	122.12	PANREAC QUIMICA	2020-11-09	https://sds.chemicalsafety.com/sds/pda/msds/getpdf.ashx?action=msdsdocument&auth=200C200C200C200C2008207A200D2078200C200C200C200C200C200C200C200C200C2008&param1=ZmRwLjFfNzYxNzg1MDNORQ==&unique=1677953151&session=0e1da735f43fe643971f4dc37256385c&hostname=78.8.217.118	2.75				3	2	1	0	0	0	2		danger	6
Urea	57-13-6	organic	solid, DES component	60.06	Sigma-Aldrich	2021-11-29	https://sds.chemicalsafety.com/sds/pda/msds/getpdf.ashx?action=msdsdocument&auth=200C200C200C200C2008207A200D2078200C200C200C200C200C200C200C200C200C2008&param1=ZmRwLjFfOTYzNDM2MDNORQ==&unique=1677955013&session=0e1da735f43fe643971f4dc37256385c&hostname=78.8.217.118	0	0.5625	1.125	200	0	0	0	0	0	0	0	0.25	none	0	3.75
Urea	57-13-6	organic	solid, DES component	60.06	Thermo Fisher	2020-02-14	https://sds.chemicalsafety.com/sds/pda/msds/getpdf.ashx?action=msdsdocument&auth=200C200C200C200C2008207A200D2078200C200C200C200C200C200C200C200C200C2008&param1=ZmRwLjFfNTkxODAzMTNORQ==&unique=1677955015&session=0e1da735f43fe643971f4dc37256385c&hostname=78.8.217.118	0				0	0	0	0	0	0	0		none	0
Urea	57-13-6	organic	solid, DES component	60.06	Combi-Blocks	2023-01-02	https://sds.chemicalsafety.com/sds/pda/msds/getpdf.ashx?action=msdsdocument&auth=200C200C200C200C2008207A200D2078200C200C200C200C200C200C200C200C200C2008&param1=ZmRwLjFfNDEyNTUxMTNORQ==&unique=1677955004&session=0e1da735f43fe643971f4dc37256385c&hostname=78.8.217.118	2.25				4	0	2	1	1	0	1		warning	15
Urea	57-13-6	organic	solid, DES component	60.06	AppliChem GmbH	2021-02-03	https://sds.chemicalsafety.com/sds/pda/msds/getpdf.ashx?action=msdsdocument&auth=200C200C200C200C2008207A200D2078200C200C200C200C200C200C200C200C200C2008&param1=ZmRwLjFfODU4Nzg1MDNORQ==&unique=1677955003&session=0e1da735f43fe643971f4dc37256385c&hostname=78.8.217.118	0				0	0	0	0	0	0	0		none	0
5-Sulfosalicylic acid dihydrate	5965-83-3	organic	solid	254.21	Sigma-Aldrich	2021-10-07	https://sds.chemicalsafety.com/sds/pda/msds/getpdf.ashx?action=msdsdocument&auth=200C200C200C200C2008207A200D2078200C200C200C200C200C200C200C200C200C2008&param1=ZmRwLjFfODA2NzgxMjNORQ==&unique=1677959739&session=0e1da735f43fe643971f4dc37256385c&hostname=78.8.217.118	2	2.375	0.777282	32.7276	2	2	0	0	0	0	1	1.25	danger	11	13
5-Sulfosalicylic acid dihydrate	5965-83-3	organic	solid	254.21	Thermo Fisher	2022-01-13	https://sds.chemicalsafety.com/sds/pda/msds/getpdf.ashx?action=msdsdocument&auth=200C200C200C200C2008207A200D2078200C200C200C200C200C200C200C200C200C2008&param1=ZmRwLjFfMzA2NjkyMTNORQ==&unique=1677959743&session=0e1da735f43fe643971f4dc37256385c&hostname=78.8.217.118	3.5				4	3	0	1	0	0	2		danger	13
5-Sulfosalicylic acid dihydrate	5965-83-3	organic	solid	254.21	Combi-Blocks	2023-01-02	https://sds.chemicalsafety.com/sds/pda/msds/getpdf.ashx?action=msdsdocument&auth=200C200C200C200C2008207A200D2078200C200C200C200C200C200C200C200C200C2008&param1=ZmRwLjFfMzQzNzUxMTNORQ==&unique=1677959734&session=0e1da735f43fe643971f4dc37256385c&hostname=78.8.217.118	2.25				4	0	2	1	1	0	1		warning	15
5-Sulfosalicylic acid dihydrate	5965-83-3	organic	solid	254.21	TCI America	2020-06-15	https://sds.chemicalsafety.com/sds/pda/msds/getpdf.ashx?action=msdsdocument&auth=200C200C200C200C2008207A200D2078200C200C200C200C200C200C200C200C200C2008&param1=ZmRwLjFfNTU3NTA1MjNORQ==&unique=1677959745&session=0e1da735f43fe643971f4dc37256385c&hostname=78.8.217.118	1.75				3	0	2	0	1	0	1		warning
GLYCINE	56-40-6	organic	solid	75.07	Sigma-Aldrich	2022-02-21	https://sds.chemicalsafety.com/sds/pda/msds/getpdf.ashx?action=msdsdocument&auth=200C200C200C200C2008207A200D2078200C200C200C200C200C200C200C200C200C2008&param1=ZmRwLjFfMTI4MDIyMjNORQ==&unique=1677960721&session=0e1da735f43fe643971f4dc37256385c&hostname=78.8.217.118	0	0.5625	1.125	200	0	0	0	0	0	0	0	0.333333	none	0	3.75
GLYCINE	56-40-6	organic	solid	75.07	Thermo Fisher	2021-01-20	https://sds.chemicalsafety.com/sds/pda/msds/getpdf.ashx?action=msdsdocument&auth=200C200C200C200C2008207A200D2078200C200C200C200C200C200C200C200C200C2008&param1=ZmRwLjJfNjQ2NDAzMTNORQ==&unique=1677960737&session=0e1da735f43fe643971f4dc37256385c&hostname=78.8.217.118	0				0	0	0	0	0	0	o		none	0
GLYCINE	56-40-6	organic	solid	75.07	Combi-Blocks	2023-01-02	https://sds.chemicalsafety.com/sds/pda/msds/getpdf.ashx?action=msdsdocument&auth=200C200C200C200C2008207A200D2078200C200C200C200C200C200C200C200C200C2008&param1=ZmRwLjFfNjk2NTYzMjNORQ==&unique=1677960724&session=0e1da735f43fe643971f4dc37256385c&hostname=78.8.217.118	2.25				4	0	2	1	1	0	1		warning	15
GLYCINE	56-40-6	organic	solid	75.07	AppliChem GmbH	2021-02-15	https://sds.chemicalsafety.com/sds/pda/msds/getpdf.ashx?action=msdsdocument&auth=200C200C200C200C2008207A200D2078200C200C200C200C200C200C200C200C200C2008&param1=ZmRwLjFfNjU4Nzg1MDNORQ==&unique=1677960721&session=0e1da735f43fe643971f4dc37256385c&hostname=78.8.217.118	0				0	0	0	0	0	0	0		none	0
Sulfanilamide	63-74-1	organic	solid	63-74-1	Sigma-Aldrich	2021-04-27	https://sds.chemicalsafety.com/sds/pda/msds/getpdf.ashx?action=msdsdocument&auth=200C200C200C200C2008207A200D2078200C200C200C200C200C200C200C200C200C2008&param1=ZmRwLjFfOTQ0NjgwMDNORQ==&unique=1678021408&session=60679ec97dfd8e96885c0cbe0e61b143&hostname=139.28.41.7	0	1.25	1.5	120	0	0	0	0	0	0	0	0.5	none	0	7
Sulfanilamide	63-74-1	organic	solid	63-74-1	Thermo Fisher	2020-02-14	https://sds.chemicalsafety.com/sds/pda/msds/getpdf.ashx?action=msdsdocument&auth=200C200C200C200C2008207A200D2078200C200C200C200C200C200C200C200C200C2008&param1=ZmRwLjFfMTM1OTAzMTNORQ==&unique=1678021488&session=60679ec97dfd8e96885c0cbe0e61b143&hostname=139.28.41.7	3				4	1	2	1	0	0	1		warning	14
Sulfanilamide	63-74-1	organic	solid	63-74-1	Combi-Blocks	2023-01-02	https://sds.chemicalsafety.com/sds/pda/msds/getpdf.ashx?action=msdsdocument&auth=200C200C200C200C2008207A200D2078200C200C200C200C200C200C200C200C200C2008&param1=ZmRwLjFfNDYyNDIwMTNORQ==&unique=1678021551&session=60679ec97dfd8e96885c0cbe0e61b143&hostname=139.28.41.7	2				3	0	2	1	0	1	1		warning	14
Sulfanilamide	63-74-1	organic	solid	63-74-1	PANREAC QUIMICA	2021-04-28	https://sds.chemicalsafety.com/sds/pda/msds/getpdf.ashx?action=msdsdocument&auth=200C200C200C200C2008207A200D2078200C200C200C200C200C200C200C200C200C2008&param1=ZmRwLjFfNTYyNzg1MDNORQ==&unique=1678021649&session=60679ec97dfd8e96885c0cbe0e61b143&hostname=139.28.41.7	0				0	0	0	0	0	0	0		none	0
Sodium nitrite	7632-00-0	inorganic	solid	69.00	Sigma-Aldrich	2022-12-28	https://sds.chemicalsafety.com/sds/pda/msds/getpdf.ashx?action=msdsdocument&auth=200C200C200C200C2008207A200D2078200C200C200C200C200C200C200C200C200C2008&param1=ZmRwLjFfNzI1ODYwMDNORQ==&unique=1678023121&session=60679ec97dfd8e96885c0cbe0e61b143&hostname=139.28.41.7	2.75	2.9375	0.375	12.766	4	1	1	2	0	0	4	3.5	danger	14	13.3333
Sodium nitrite	7632-00-0	inorganic	solid	69.00	Thermo Fisher	2020-02-14	https://sds.chemicalsafety.com/sds/pda/msds/getpdf.ashx?action=msdsdocument&auth=200C200C200C200C2008207A200D2078200C200C200C200C200C200C200C200C200C2008&param1=ZmRwLjFfODE5ODAzMTNORQ==&unique=1678023223&session=60679ec97dfd8e96885c0cbe0e61b143&hostname=139.28.41.7	3.5				5	1	2	2	0	0	3		danger	19
Sodium nitrite	7632-00-0	inorganic	solid	69.00	U. S. Pharmacopeia	2020-11-12	https://sds.chemicalsafety.com/sds/pda/msds/getpdf.ashx?action=msdsdocument&auth=200C200C200C200C2008207A200D2078200C200C200C200C200C200C200C200C200C2008&param1=ZmRwLjFfMTUyODQ1MjNORQ==&unique=1678023287&session=60679ec97dfd8e96885c0cbe0e61b143&hostname=139.28.41.7	2.75				4	1	1	2	0	0	4		danger
Sodium nitrite	7632-00-0	inorganic	solid	69.00	PANREAC QUIMICA	2020-07-22	https://sds.chemicalsafety.com/sds/pda/msds/getpdf.ashx?action=msdsdocument&auth=200C200C200C200C2008207A200D2078200C200C200C200C200C200C200C200C200C2008&param1=ZmRwLjFfNzA3Nzg1MDNORQ==&unique=1678023345&session=60679ec97dfd8e96885c0cbe0e61b143&hostname=139.28.41.7	2.75				4	1	1	2	0	0	3		danger	7
Myristic acid	544-63-8	organic	solid	228.37	Sigma-Aldrich	2022-06-14	https://sds.chemicalsafety.com/sds/pda/msds/getpdf.ashx?action=msdsdocument&auth=200C200C200C200C2008207A200D2078200C200C200C200C200C200C200C200C200C2008&param1=ZmRwLjJfNjk4NTgxMjNORQ==&unique=1678028674&session=60679ec97dfd8e96885c0cbe0e61b143&hostname=139.28.41.7	0	0.75	0.612372	81.6497	0	0	0	0	0	0	0	0.75	none	0	3
Myristic acid	544-63-8	organic	solid	228.37	Thermo Fisher	2020-02-14	https://sds.chemicalsafety.com/sds/pda/msds/getpdf.ashx?action=msdsdocument&auth=200C200C200C200C2008207A200D2078200C200C200C200C200C200C200C200C200C2008&param1=ZmRwLjFfMjY1NzAzMTNORQ==&unique=1678028750&session=60679ec97dfd8e96885c0cbe0e61b143&hostname=139.28.41.7	0.75				1	0	1	0	0	0	1		warning	4
Myristic acid	544-63-8	organic	solid	228.37	Combi-Blocks	2023-01-02	https://sds.chemicalsafety.com/sds/pda/msds/getpdf.ashx?action=msdsdocument&auth=200C200C200C200C2008207A200D2078200C200C200C200C200C200C200C200C200C2008&param1=ZmRwLjFfMTQ0NDUxMTNORQ==&unique=1678028804&session=60679ec97dfd8e96885c0cbe0e61b143&hostname=139.28.41.7	0.75				1	0	1	0	0	0	1		warning	5
Myristic acid	544-63-8	organic	solid	228.37	U. S. Pharmacopeia	2020-11-04	https://sds.chemicalsafety.com/sds/pda/msds/getpdf.ashx?action=msdsdocument&auth=200C200C200C200C2008207A200D2078200C200C200C200C200C200C200C200C200C2008&param1=ZmRwLjFfMzcxNzQ1MjNORQ==&unique=1678028846&session=60679ec97dfd8e96885c0cbe0e61b143&hostname=139.28.41.7	1.5				2	0	2	0	0	0	1		warning
Sodium iodide	7681-82-5	inorganic	solid	149.89	Sigma-Aldrich	2021-09-19	https://sds.chemicalsafety.com/sds/pda/msds/getpdf.ashx?action=msdsdocument&auth=200C200C200C200C2008207A200D2078200C200C200C200C200C200C200C200C200C2008&param1=ZmRwLjFfNjA1NzgxMjNORQ==&unique=1678029420&session=60679ec97dfd8e96885c0cbe0e61b143&hostname=139.28.41.7	3.5	2.9375	0.657489	22.3826	4	2	2	0	0	0	3	2.25	danger	13	11.3333
Sodium iodide	7681-82-5	inorganic	solid	149.89	Thermo Fisher	2022-05-25	https://sds.chemicalsafety.com/sds/pda/msds/getpdf.ashx?action=msdsdocument&auth=200C200C200C200C2008207A200D2078200C200C200C200C200C200C200C200C200C2008&param1=ZmRwLjFfMTA5NzAzMTNORQ==&unique=1678029502&session=60679ec97dfd8e96885c0cbe0e61b143&hostname=139.28.41.7	3.5				4	2	2	0	0	0	2		danger	11
Sodium iodide	7681-82-5	inorganic	solid	149.89	Combi-Blocks	2023-01-02	https://sds.chemicalsafety.com/sds/pda/msds/getpdf.ashx?action=msdsdocument&auth=200C200C200C200C2008207A200D2078200C200C200C200C200C200C200C200C200C2008&param1=ZmRwLjFfMjcwNDUxMTNORQ==&unique=1678029551&session=60679ec97dfd8e96885c0cbe0e61b143&hostname=139.28.41.7	2.5				3	1	2	0	0	0	2		warning	10
Sodium iodide	7681-82-5	inorganic	solid	149.89	TCI America	2020-06-18	https://sds.chemicalsafety.com/sds/pda/msds/getpdf.ashx?action=msdsdocument&auth=200C200C200C200C2008207A200D2078200C200C200C200C200C200C200C200C200C2008&param1=ZmRwLjFfNDEyOTA1MjNORQ==&unique=1678029604&session=60679ec97dfd8e96885c0cbe0e61b143&hostname=139.28.41.7	2.25				3	0	3	0	0	0	2		warning
Choline chloride	67-48-1	organic	solid, DES component	139.62	Sigma-Aldrich	2022-09-16	https://sds.chemicalsafety.com/sds/pda/msds/getpdf.ashx?action=msdsdocument&auth=200C200C200C200C2008207A200D2078200C200C200C200C200C200C200C200C200C2008&param1=ZmRwLjFfNzE0NTg2MDNORQ==&unique=1678102333&session=60679ec97dfd8e96885c0cbe0e61b143&hostname=139.28.41.7	0	0.5	1	200	0	0	0	0	0	0	0	0.25	none	0	3.25
Choline chloride	67-48-1	organic	solid, DES component	139.62	Thermo Fisher	2020-02-14	https://sds.chemicalsafety.com/sds/pda/msds/getpdf.ashx?action=msdsdocument&auth=200C200C200C200C2008207A200D2078200C200C200C200C200C200C200C200C200C2008&param1=ZmRwLjFfNDgyMDAzMTNORQ==&unique=1678102651&session=60679ec97dfd8e96885c0cbe0e61b143&hostname=139.28.41.7	0				0	0	0	0	0	0	0		none	0
Choline chloride	67-48-1	organic	solid, DES component	139.62	Combi-Blocks	2023-01-02	https://sds.chemicalsafety.com/sds/pda/msds/getpdf.ashx?action=msdsdocument&auth=200C200C200C200C2008207A200D2078200C200C200C200C200C200C200C200C200C2008&param1=ZmRwLjFfMDA3NzUxMTNORQ==&unique=1678102696&session=60679ec97dfd8e96885c0cbe0e61b143&hostname=139.28.41.7	2				3	0	2	1	0	0	1		warning	13
Choline chloride	67-48-1	organic	solid, DES component	139.62	AppliChem GmbH	2021-03-08	https://sds.chemicalsafety.com/sds/pda/msds/getpdf.ashx?action=msdsdocument&auth=200C200C200C200C2008207A200D2078200C200C200C200C200C200C200C200C200C2008&param1=ZmRwLjFfOTEwNjg1MDNORQ==&unique=1678102770&session=60679ec97dfd8e96885c0cbe0e61b143&hostname=139.28.41.7	0				0	0	0	0	0	0	0		none	0
Adipic acid	124-04-9	organic	solid, DES component	146.14	Sigma-Aldrich	2022-07-24	https://sds.chemicalsafety.com/sds/pda/msds/getpdf.ashx?action=msdsdocument&auth=200C200C200C200C2008207A200D2078200C200C200C200C200C200C200C200C200C2008&param1=ZmRwLjFfNzE4NjgxMjNORQ==&unique=1678108038&session=60679ec97dfd8e96885c0cbe0e61b143&hostname=139.28.41.7	1.5	1.0625	0.314576	29.6072	2	1	0	1	0	0	1	1	danger	4	3
Adipic acid	124-04-9	organic	solid, DES component	146.14	Thermo Fisher	2020-02-14	https://sds.chemicalsafety.com/sds/pda/msds/getpdf.ashx?action=msdsdocument&auth=200C200C200C200C2008207A200D2078200C200C200C200C200C200C200C200C200C2008&param1=ZmRwLjFfNzU5NzkyMTNORQ==&unique=1678108118&session=60679ec97dfd8e96885c0cbe0e61b143&hostname=139.28.41.7	1				1	1	0	0	0	0	1		danger	3
Adipic acid	124-04-9	organic	solid, DES component	146.14	Combi-Blocks	2023-01-02	https://sds.chemicalsafety.com/sds/pda/msds/getpdf.ashx?action=msdsdocument&auth=200C200C200C200C2008207A200D2078200C200C200C200C200C200C200C200C200C2008&param1=ZmRwLjFfNTg1NDUxMTNORQ==&unique=1678108161&session=60679ec97dfd8e96885c0cbe0e61b143&hostname=139.28.41.7	1				1	1	0	0	0	0	1		danger	2
Adipic acid	124-04-9	organic	solid, DES component	146.14	U. S. Pharmacopeia	2021-09-07	https://sds.chemicalsafety.com/sds/pda/msds/getpdf.ashx?action=msdsdocument&auth=200C200C200C200C2008207A200D2078200C200C200C200C200C200C200C200C200C2008&param1=ZmRwLjFfMDY3NTQ1MjNORQ==&unique=1678108214&session=60679ec97dfd8e96885c0cbe0e61b143&hostname=139.28.41.7	0.75				1	0	1	0	0	0	1		warning
Succinic acid	110-15-6	organic	solid, DES component	118.09	Sigma-Aldrich	2021-11-26	https://sds.chemicalsafety.com/sds/pda/msds/getpdf.ashx?action=msdsdocument&auth=200C200C200C200C2008207A200D2078200C200C200C200C200C200C200C200C200C2008&param1=ZmRwLjFfMTc0NDgxMjNORQ==&unique=1678109379&session=60679ec97dfd8e96885c0cbe0e61b143&hostname=139.28.41.7	1	1.375	0.75	54.5455	2	1	0	1	0	0	1	1.25	danger	4	4.75
Succinic acid	110-15-6	organic	solid, DES component	118.09	Thermo Fisher	2020-02-29	https://sds.chemicalsafety.com/sds/pda/msds/getpdf.ashx?action=msdsdocument&auth=200C200C200C200C2008207A200D2078200C200C200C200C200C200C200C200C200C2008&param1=ZmRwLjFfMzU2ODAzMTNORQ==&unique=1678109454&session=60679ec97dfd8e96885c0cbe0e61b143&hostname=139.28.41.7	2.5				3	2	0	1	0	0	2		danger	10
Succinic acid	110-15-6	organic	solid, DES component	118.09	Combi-Blocks	2023-01-02	https://sds.chemicalsafety.com/sds/pda/msds/getpdf.ashx?action=msdsdocument&auth=200C200C200C200C2008207A200D2078200C200C200C200C200C200C200C200C200C2008&param1=ZmRwLjFfMTA4MzYxMTNORQ==&unique=1678109511&session=60679ec97dfd8e96885c0cbe0e61b143&hostname=139.28.41.7	1				1	1	0	0	0	0	1		danger	2
Succinic acid	110-15-6	organic	solid, DES component	118.09	PANREAC QUIMICA S.L.U.	2020-11-09	https://sds.chemicalsafety.com/sds/pda/msds/getpdf.ashx?action=msdsdocument&auth=200C200C200C200C2008207A200D2078200C200C200C200C200C200C200C200C200C2008&param1=ZmRwLjFfMTE1Nzg1MDNORQ==&unique=1678109552&session=60679ec97dfd8e96885c0cbe0e61b143&hostname=139.28.41.7	1				1	1	0	0	0	0	1		danger	3
1,3-Propanediol	504-63-2	organic	liquid, DES component	76.09	Sigma-Aldrich	2022-09-27	https://sds.chemicalsafety.com/sds/pda/msds/getpdf.ashx?action=msdsdocument&auth=200C200C200C200C2008207A200D2078200C200C200C200C200C200C200C200C200C2008&param1=ZmRwLjFfNDg2OTM2MDNORQ==&unique=1678136217&session=60679ec97dfd8e96885c0cbe0e61b143&hostname=139.28.41.7	0	0.75	1.06066	141.421	0	0	0	0	0	0	0	0.5	none	0	5
1,3-Propanediol	504-63-2	organic	liquid, DES component	76.09	Thermo Fisher	2020-02-14	https://sds.chemicalsafety.com/sds/pda/msds/getpdf.ashx?action=msdsdocument&auth=200C200C200C200C2008207A200D2078200C200C200C200C200C200C200C200C200C2008&param1=ZmRwLjFfNTk5OTAzMTNORQ==&unique=1678136283&session=60679ec97dfd8e96885c0cbe0e61b143&hostname=139.28.41.7	0				0	0	0	0	0	0	0		none	0
1,3-Propanediol	504-63-2	organic	liquid, DES component	76.09	Combi-Blocks	2023-01-02	https://sds.chemicalsafety.com/sds/pda/msds/getpdf.ashx?action=msdsdocument&auth=200C200C200C200C2008207A200D2078200C200C200C200C200C200C200C200C200C2008&param1=ZmRwLjFfMzg2MzUxMTNORQ==&unique=1678136282&session=60679ec97dfd8e96885c0cbe0e61b143&hostname=139.28.41.7	2.25				4	0	2	1	1	0	1		warning	15
1,3-Propanediol	504-63-2	organic	liquid, DES component	76.09	U. S. Pharmacopeia	2021-01-15	https://sds.chemicalsafety.com/sds/pda/msds/getpdf.ashx?action=msdsdocument&auth=200C200C200C200C2008207A200D2078200C200C200C200C200C200C200C200C200C2008&param1=ZmRwLjFfMTkzNzQ1MjNORQ==&unique=1678136375&session=60679ec97dfd8e96885c0cbe0e61b143&hostname=139.28.41.7	0.75				1	0	1	0	0	0	1		warning
Pentane	109-66-0	organic	liquid	72.15	Sigma-Aldrich	2021-06-30	https://sds.chemicalsafety.com/sds/pda/msds/getpdf.ashx?action=msdsdocument&auth=200C200C200C200C2008207A200D2078200C200C200C200C200C200C200C200C200C2008&param1=ZmRwLjFfNDc0NTgwMDNORQ==&unique=1678217672&session=ffe609ad4d87d36f4049e78c6027dbfe&hostname=139.28.41.7	3.75	3.0625	0.625	20.4082	5	1	3	1	0	0	4	3.5	danger	20	15
Pentane	109-66-0	organic	liquid	72.15	Thermo Fisher	2020-04-03	https://sds.chemicalsafety.com/sds/pda/msds/getpdf.ashx?action=msdsdocument&auth=200C200C200C200C2008207A200D2078200C200C200C200C200C200C200C200C200C2008&param1=ZmRwLjFfODAwNzAzMTNORQ==&unique=1678217828&session=ffe609ad4d87d36f4049e78c6027dbfe&hostname=139.28.41.7	3.25				4	2	1	1	0	0	3		danger	19
Pentane	109-66-0	organic	liquid	72.15	U. S. Pharmacopeia	2020-12-14	https://sds.chemicalsafety.com/sds/pda/msds/getpdf.ashx?action=msdsdocument&auth=200C200C200C200C2008207A200D2078200C200C200C200C200C200C200C200C200C2008&param1=ZmRwLjFfNDQwODQ1MjNORQ==&unique=1678217917&session=ffe609ad4d87d36f4049e78c6027dbfe&hostname=139.28.41.7	2.25				3	1	1	1	0	0	3		danger
Pentane	109-66-0	organic	liquid	72.15	PANREAC QUIMICA S.L.U.	2021-04-28	https://sds.chemicalsafety.com/sds/pda/msds/getpdf.ashx?action=msdsdocument&auth=200C200C200C200C2008207A200D2078200C200C200C200C200C200C200C200C200C2008&param1=ZmRwLjFfMDMyNzg1MDNORQ==&unique=1678217960&session=ffe609ad4d87d36f4049e78c6027dbfe&hostname=139.28.41.7	3				4	1	2	1	0	0	4		danger	6
1-Hexene	592-41-6	organic	liquid	84.16	Sigma-Aldrich	2022-09-06	https://sds.chemicalsafety.com/sds/pda/msds/getpdf.ashx?action=msdsdocument&auth=200C200C200C200C2008207A200D2078200C200C200C200C200C200C200C200C200C2008&param1=ZmRwLjFfNTQ2MjMwMDNORQ==&unique=1678274833&session=16a6a8da7e51bf4b79e724bfec6661d4&hostname=139.28.41.7	2.5	2.3125	0.71807	31.0517	3	1	2	0	0	0	2	2.25	danger	15	16.75
1-Hexene	592-41-6	organic	liquid	84.16	Thermo Fisher	2020-02-14	https://sds.chemicalsafety.com/sds/pda/msds/getpdf.ashx?action=msdsdocument&auth=200C200C200C200C2008207A200D2078200C200C200C200C200C200C200C200C200C2008&param1=ZmRwLjFfNjI4MTEzMTNORQ==&unique=1678274930&session=16a6a8da7e51bf4b79e724bfec6661d4&hostname=139.28.41.7	3.25				4	2	1	1	0	0	3		danger	19
1-Hexene	592-41-6	organic	liquid	84.16	Combi-Blocks	2020-01-29	https://sds.chemicalsafety.com/sds/pda/msds/getpdf.ashx?action=msdsdocument&auth=200C200C200C200C2008207A200D2078200C200C200C200C200C200C200C200C200C2008&param1=ZmRwLjFfNjgxMzYxMTNORQ==&unique=1678274982&session=16a6a8da7e51bf4b79e724bfec6661d4&hostname=139.28.41.7	1.75				2	1	1	0	0	0	2		danger	13
1-Hexene	592-41-6	organic	liquid	84.16	Linde Inc	2022-01-31	https://sds.chemicalsafety.com/sds/pda/msds/getpdf.ashx?action=msdsdocument&auth=200C200C200C200C2008207A200D2078200C200C200C200C200C200C200C200C200C2008&param1=ZmRwLjFfMjEyODAyMjNORQ==&unique=1678275045&session=16a6a8da7e51bf4b79e724bfec6661d4&hostname=139.28.41.7	1.75				2	1	1	0	0	0	2		danger	20
Oleyl alcohol	143-28-2	organic	liquid	268.48	Sigma-Aldrich	2021-02-25	https://sds.chemicalsafety.com/sds/pda/msds/getpdf.ashx?action=msdsdocument&auth=200C200C200C200C2008207A200D2078200C200C200C200C200C200C200C200C200C2008&param1=ZmRwLjFfNDAzNDM2MDNORQ==&unique=1678276325&session=16a6a8da7e51bf4b79e724bfec6661d4&hostname=139.28.41.7	0	0.5625	0.71807	127.657	0	0	0	0	0	0	0	0.5	none	0	3
Oleyl alcohol	143-28-2	organic	liquid	268.48	Thermo Fisher	2020-02-18	https://sds.chemicalsafety.com/sds/pda/msds/getpdf.ashx?action=msdsdocument&auth=200C200C200C200C2008207A200D2078200C200C200C200C200C200C200C200C200C2008&param1=ZmRwLjFfMTQ5NDAzMTNORQ==&unique=1678276401&session=16a6a8da7e51bf4b79e724bfec6661d4&hostname=139.28.41.7	1.5				2	0	2	0	0	0	1		warning	7
Oleyl alcohol	143-28-2	organic	liquid	268.48	Combi-Blocks	2023-01-02	https://sds.chemicalsafety.com/sds/pda/msds/getpdf.ashx?action=msdsdocument&auth=200C200C200C200C2008207A200D2078200C200C200C200C200C200C200C200C200C2008&param1=ZmRwLjFfNTMwMTYxMTNORQ==&unique=1678276456&session=16a6a8da7e51bf4b79e724bfec6661d4&hostname=139.28.41.7	0.75				1	0	1	0	0	0	1		warning	5
Oleyl alcohol	143-28-2	organic	liquid	268.48	U. S. Pharmacopeia	2020-12-02	https://sds.chemicalsafety.com/sds/pda/msds/getpdf.ashx?action=msdsdocument&auth=200C200C200C200C2008207A200D2078200C200C200C200C200C200C200C200C200C2008&param1=ZmRwLjFfNzkwODQ1MjNORQ==&unique=1678276494&session=16a6a8da7e51bf4b79e724bfec6661d4&hostname=139.28.41.7	0				0	0	0	0	0	0	0		none	0
4-Methyl-2-pentanone	108-10-1	organic	liquid	100.16	Sigma-Aldrich	2023-02-07	https://sds.chemicalsafety.com/sds/pda/msds/getpdf.ashx?action=msdsdocument&auth=200C200C200C200C2008207A200D2078200C200C200C200C200C200C200C200C200C2008&param1=ZmRwLjFfMDk3MTQxMjNORQ==&unique=1678354428&session=2751172db67a17ce680fd5a8642fbf45&hostname=139.28.41.7	3	3.0625	0.71807	23.4472	5	0	3	1	1	0	3	2.75	danger	22	16
4-Methyl-2-pentanone	108-10-1	organic	liquid	100.16	Thermo Fisher	2022-10-20	https://sds.chemicalsafety.com/sds/pda/msds/getpdf.ashx?action=msdsdocument&auth=200C200C200C200C2008207A200D2078200C200C200C200C200C200C200C200C200C2008&param1=ZmRwLjFfODIwNjkyMTNORQ==&unique=1678354521&session=2751172db67a17ce680fd5a8642fbf45&hostname=139.28.41.7	4				6	1	3	1	1	0	3		danger	23
4-Methyl-2-pentanone	108-10-1	organic	liquid	100.16	PANREAC QUIMICA S.L.U.	2020-12-03	https://sds.chemicalsafety.com/sds/pda/msds/getpdf.ashx?action=msdsdocument&auth=200C200C200C200C2008207A200D2078200C200C200C200C200C200C200C200C200C2008&param1=ZmRwLjFfNzk5Nzg1MDNORQ==&unique=1678354597&session=2751172db67a17ce680fd5a8642fbf45&hostname=139.28.41.7	2.25				4	0	2	1	1	0	2		danger	3
4-Methyl-2-pentanone	108-10-1	organic	liquid	100.16	U. S. Pharmacopeia	2020-02-20	https://sds.chemicalsafety.com/sds/pda/msds/getpdf.ashx?action=msdsdocument&auth=200C200C200C200C2008207A200D2078200C200C200C200C200C200C200C200C200C2008&param1=ZmRwLjFfODE1NzQ1MjNORQ==&unique=1678354661&session=2751172db67a17ce680fd5a8642fbf45&hostname=139.28.41.7	3				5	0	3	1	1	0	3		danger
Diethyl carbonate	105-58-8	organic	liquid	118.13	Sigma-Aldrich	2022-04-12	https://sds.chemicalsafety.com/sds/pda/msds/getpdf.ashx?action=msdsdocument&auth=200C200C200C200C2008207A200D2078200C200C200C200C200C200C200C200C200C2008&param1=ZmRwLjFfMTEyNjg2MDNORQ==&unique=1678366239&session=2430283b0df3d656d5ac4650fb9d03d8&hostname=78.8.217.118	0.5	1.5	1.1547	76.98	1	0	0	1	0	0	1	1.5	warning	11	16.25
Diethyl carbonate	105-58-8	organic	liquid	118.13	Combi-Blocks	2023-01-02	https://sds.chemicalsafety.com/sds/pda/msds/getpdf.ashx?action=msdsdocument&auth=200C200C200C200C2008207A200D2078200C200C200C200C200C200C200C200C200C2008&param1=ZmRwLjFfNTI1NTUxMTNORQ==&unique=1678366239&session=2430283b0df3d656d5ac4650fb9d03d8&hostname=78.8.217.118	2.5				4	0	2	2	0	0	2		warning	20
Diethyl carbonate	105-58-8	organic	liquid	118.13	Thermo Fisher	2020-02-14	https://sds.chemicalsafety.com/sds/pda/msds/getpdf.ashx?action=msdsdocument&auth=200C200C200C200C2008207A200D2078200C200C200C200C200C200C200C200C200C2008&param1=ZmRwLjFfMzI3MTAzMTNORQ==&unique=1678366245&session=2430283b0df3d656d5ac4650fb9d03d8&hostname=78.8.217.118	0.5				1	0	0	1	0	0	1		warning	11
Diethyl carbonate	105-58-8	organic	liquid	118.13	Spectrum Chemical Mfg. Corp	2022-04-11	https://sds.chemicalsafety.com/sds/pda/msds/getpdf.ashx?action=msdsdocument&auth=200C200C200C200C2008207A200D2078200C200C200C200C200C200C200C200C200C2008&param1=ZmRwLjFfOTA5Nzk3MjNORQ==&unique=1678366241&session=2430283b0df3d656d5ac4650fb9d03d8&hostname=78.8.217.118	2.5				4	0	2	2	0	0	2		warning	23
γ-Decalactone	706-14-9	organic	liquid	170.25	Sigma-Aldrich	2022-06-10	https://sds.chemicalsafety.com/sds/pda/msds/getpdf.ashx?action=msdsdocument&auth=200C200C200C200C2008207A200D2078200C200C200C200C200C200C200C200C200C2008&param1=ZmRwLjFfNjYxNjgxMjNORQ==&unique=1676925701&session=557fdb86592034636826dc01208cc657&hostname=139.28.41.7	0	1.66667	1.52753	91.6515	0	0	0	0	0	0	0	0.666667	none	0	9
γ-Decalactone	706-14-9	organic	liquid	170.25	Combi-Blocks	2021-01-13	https://sds.chemicalsafety.com/sds/pda/msds/getpdf.ashx?action=msdsdocument&auth=200C200C200C200C2008207A200D2078200C200C200C200C200C200C200C200C200C2008&param1=ZmRwLjFfOTgwMTYxMTNORQ==&unique=1676925869&session=557fdb86592034636826dc01208cc657&hostname=139.28.41.7	2				3	0	2	1	0	0	1		warning	13
γ-Decalactone	706-14-9	organic	liquid	170.25	Thermo Fisher	2020-02-14	https://sds.chemicalsafety.com/sds/pda/msds/getpdf.ashx?action=msdsdocument&auth=200C200C200C200C2008207A200D2078200C200C200C200C200C200C200C200C200C2008&param1=ZmRwLjFfMzg5MTAzMTNORQ==&unique=1676925949&session=557fdb86592034636826dc01208cc657&hostname=139.28.41.7	3				4	1	2	1	0	0	1		warning	14
(2-Hydroxypropyl)-β-cyclodextrin	128446-35-5	organic	solid	1380	Sigma-Aldrich	2022-03-26	https://sds.chemicalsafety.com/sds/pda/msds/getpdf.ashx?action=msdsdocument&auth=200C200C200C200C2008207A200D2078200C200C200C200C200C200C200C200C200C2008&param1=ZmRwLjFfODIwNDgxMjNORQ==&unique=1676929302&session=557fdb86592034636826dc01208cc657&hostname=139.28.41.7	0	0	0	0	0	0	0	0	0	0	0	0	none	0	0
(2-Hydroxypropyl)-β-cyclodextrin	128446-35-5	organic	solid	1380	Thermo Fisher	2020-02-14	https://sds.chemicalsafety.com/sds/pda/msds/getpdf.ashx?action=msdsdocument&auth=200C200C200C200C2008207A200D2078200C200C200C200C200C200C200C200C200C2008&param1=ZmRwLjFfMDg4NTEzMTNORQ==&unique=1676929475&session=557fdb86592034636826dc01208cc657&hostname=139.28.41.7	0				0	0	0	0	0	0	0		none	0
(2-Hydroxypropyl)-β-cyclodextrin	128446-35-5	organic	solid	1380	AppliChem GmbH	2021-03-11	https://sds.chemicalsafety.com/sds/pda/msds/getpdf.ashx?action=msdsdocument&auth=200C200C200C200C2008207A200D2078200C200C200C200C200C200C200C200C200C2008&param1=ZmRwLjFfMDcxNjg1MDNORQ==&unique=1676929641&session=557fdb86592034636826dc01208cc657&hostname=139.28.41.7	0				0	0	0	0	0	0	0		none	0
(S)-(−)-Limonene	5989-54-8	organic	liquid	136.23	Sigma-Aldrich	2022-12-22	https://sds.chemicalsafety.com/sds/pda/msds/getpdf.ashx?action=msdsdocument&auth=200C200C200C200C2008207A200D2078200C200C200C200C200C200C200C200C200C2008&param1=ZmRwLjJfNDk3MDY2MDNORQ==&unique=1677158065&session=6365fb7a9edc69f8e4517c7c8da680ed&hostname=78.8.217.118	5.25	4.41667	1.04083	23.566	6	4	1	1	0	0	4	3.33333	danger	21	22
(S)-(−)-Limonene	5989-54-8	organic	liquid	136.23	Combi-Blocks	2020-01-29	https://sds.chemicalsafety.com/sds/pda/msds/getpdf.ashx?action=msdsdocument&auth=200C200C200C200C2008207A200D2078200C200C200C200C200C200C200C200C200C2008&param1=ZmRwLjFfNDE1MTYxMTNORQ==&unique=1677158071&session=6365fb7a9edc69f8e4517c7c8da680ed&hostname=78.8.217.118	3.25				4	2	1	1	0	0	3		warning	20
(S)-(−)-Limonene	5989-54-8	organic	liquid	136.23	Thermo Fisher	2022-10-20	https://sds.chemicalsafety.com/sds/pda/msds/getpdf.ashx?action=msdsdocument&auth=200C200C200C200C2008207A200D2078200C200C200C200C200C200C200C200C200C2008&param1=ZmRwLjFfNDI0OTAzMTNORQ==&unique=1677158073&session=6365fb7a9edc69f8e4517c7c8da680ed&hostname=78.8.217.118	4.75				6	2	3	1	0	0	3		danger	25
1,1,1-Trichloro-2-methyl-2-propanol hemihydrate	6001-64-5	organic	solid	186.46	Sigma-Aldrich	2022-10-02	https://sds.chemicalsafety.com/sds/pda/msds/getpdf.ashx?action=msdsdocument&auth=200C200C200C200C2008207A200D2078200C200C200C200C200C200C200C200C200C2008&param1=ZmRwLjFfNzAyMTQ2MDNORQ==&unique=1677534965&session=f99c59d06bf130d9b71feb3ce96b8ec3&hostname=139.28.41.7	0.25	1.91667	1.52753	79.697	1	0	0	0	1	0	1	1	warning	4	12
1,1,1-Trichloro-2-methyl-2-propanol hemihydrate	6001-64-5	organic	solid	186.46	Combi-Blocks	2022-09-22	https://sds.chemicalsafety.com/sds/pda/msds/getpdf.ashx?action=msdsdocument&auth=200C200C200C200C2008207A200D2078200C200C200C200C200C200C200C200C200C2008&param1=ZmRwLjFfNjI2MTYxMTNORQ==&unique=1677535074&session=f99c59d06bf130d9b71feb3ce96b8ec3&hostname=139.28.41.7	2.25				4	0	2	1	1	0	1		warning	15
1,1,1-Trichloro-2-methyl-2-propanol hemihydrate	6001-64-5	organic	solid	186.46	Thermo Fisher	2020-02-14	https://sds.chemicalsafety.com/sds/pda/msds/getpdf.ashx?action=msdsdocument&auth=200C200C200C200C2008207A200D2078200C200C200C200C200C200C200C200C200C2008&param1=ZmRwLjFfMjM4OTAzMTNORQ==&unique=1677535135&session=f99c59d06bf130d9b71feb3ce96b8ec3&hostname=139.28.41.7	3.25				5	1	2	1	1	0	1		warning	17
2,2,4-Trimethylpentane	540-84-1	organic	liquid	114.23	Sigma-Aldrich	2022-08-27	https://sds.chemicalsafety.com/sds/pda/msds/getpdf.ashx?action=msdsdocument&auth=200C200C200C200C2008207A200D2078200C200C200C200C200C200C200C200C200C2008&param1=ZmRwLjJfODg5MDI0MDNORQ==&unique=1676932842&session=557fdb86592034636826dc01208cc657&hostname=139.28.41.7	5	4.58333	0.520416	11.3545	6	3	2	1	0	0	4	3.66667	danger	23	23
2,2,4-Trimethylpentane	540-84-1	organic	liquid	114.23	Combi-Blocks	2021-06-14	https://sds.chemicalsafety.com/sds/pda/msds/getpdf.ashx?action=msdsdocument&auth=200C200C200C200C2008207A200D2078200C200C200C200C200C200C200C200C200C2008&param1=ZmRwLjFfMDk0NTYxMTNORQ==&unique=1676933035&session=557fdb86592034636826dc01208cc657&hostname=139.28.41.7	4				5	2	2	1	0	0	4		danger	21
2,2,4-Trimethylpentane	540-84-1	organic	liquid	114.23	Thermo Fisher	2020-02-14	https://sds.chemicalsafety.com/sds/pda/msds/getpdf.ashx?action=msdsdocument&auth=200C200C200C200C2008207A200D2078200C200C200C200C200C200C200C200C200C2008&param1=ZmRwLjFfMzY1MjEzMTNORQ==&unique=1676933142&session=557fdb86592034636826dc01208cc657&hostname=139.28.41.7	4.75				6	2	3	1	0	0	3		danger	25
3-Methyl-1,2-cyclopentanedione	765-70-8	organic	solid	112.13	Sigma-Aldrich	2022-04-04	https://sds.chemicalsafety.com/sds/pda/msds/getpdf.ashx?action=msdsdocument&auth=200C200C200C200C2008207A200D2078200C200C200C200C200C200C200C200C200C2008&param1=ZmRwLjFfMzMwMTQ2MDNORQ==&unique=1676929932&session=9c1a704466e3bae6447bfa7b329f5889&hostname=78.8.217.118	0	1	1.73205	173.205	0	0	0	0	0	0	0	0.666667	none	0	5
3-Methyl-1,2-cyclopentanedione	765-70-8	organic	solid	112.13	Combi-Blocks	2020-12-14	https://sds.chemicalsafety.com/sds/pda/msds/getpdf.ashx?action=msdsdocument&auth=200C200C200C200C2008207A200D2078200C200C200C200C200C200C200C200C200C2008&param1=ZmRwLjFfMTk0MTYxMTNORQ==&unique=1676929935&session=9c1a704466e3bae6447bfa7b329f5889&hostname=78.8.217.118	3				4	1	2	1	0	0	2		danger	15
3-Methyl-1,2-cyclopentanedione	765-70-8	organic	solid	112.13	Thermo Fisher	2020-02-14	https://sds.chemicalsafety.com/sds/pda/msds/getpdf.ashx?action=msdsdocument&auth=200C200C200C200C2008207A200D2078200C200C200C200C200C200C200C200C200C2008&param1=ZmRwLjFfMTg0OTgyMTNORQ==&unique=1676929938&session=9c1a704466e3bae6447bfa7b329f5889&hostname=78.8.217.118	0				0	0	0	0	0	0	0		none	0
4-Chloro-7-nitrobenzofurazan	10199-89-0	organic	solid	199.55	Sigma-Aldrich	2020-05-20	https://sds.chemicalsafety.com/sds/pda/msds/getpdf.ashx?action=msdsdocument&auth=200C200C200C200C2008207A200D2078200C200C200C200C200C200C200C200C200C2008&param1=ZmRwLjFfMTE5ODQwMDNORQ==&unique=1676978766&session=23742bc2319efd3fb56ee581bcf57170&hostname=139.28.41.7	1.5	1.5	0	0	2	0	2	0	0	0	1	1	warning	7	7
4-Chloro-7-nitrobenzofurazan	10199-89-0	organic	solid	199.55	Combi-Blocks	2021-03-26	https://sds.chemicalsafety.com/sds/pda/msds/getpdf.ashx?action=msdsdocument&auth=200C200C200C200C2008207A200D2078200C200C200C200C200C200C200C200C200C2008&param1=ZmRwLjFfOTg3OTIxMTNORQ==&unique=1676979112&session=23742bc2319efd3fb56ee581bcf57170&hostname=139.28.41.7	1.5				2	0	2	0	0	0	1		warning	7
4-Chloro-7-nitrobenzofurazan	10199-89-0	organic	solid	199.55	Thermo Fisher	2021-12-23	https://sds.chemicalsafety.com/sds/pda/msds/getpdf.ashx?action=msdsdocument&auth=200C200C200C200C2008207A200D2078200C200C200C200C200C200C200C200C200C2008&param1=ZmRwLjFfNTk0NDkyMTNORQ==&unique=1676979179&session=23742bc2319efd3fb56ee581bcf57170&hostname=139.28.41.7	1.5				2	0	2	0	0	0	1		warning	7
5,7-Dihydroxy-4-methylcoumarin	2107-76-8	organic	solid	192.17	Sigma-Aldrich	02.20.2022	https://sds.chemicalsafety.com/sds/pda/msds/getpdf.ashx?action=msdsdocument&auth=200C200C200C200C2008207A200D2078200C200C200C200C200C200C200C200C200C2008&param1=ZmRwLjFfNjUxNTI2MDNORQ==&unique=1677495585&session=49305c2cf7bf8e5ab1ba6b83c8fc70df&hostname=139.28.41.7	0.25	1.75	1.39194	79.5395	1	0	0	0	1	0	1	1	warning	4	10.3333
5,7-Dihydroxy-4-methylcoumarin	2107-76-8	organic	solid	192.17	Combi-Blocks	2021-01-22	https://sds.chemicalsafety.com/sds/pda/msds/getpdf.ashx?action=msdsdocument&auth=200C200C200C200C2008207A200D2078200C200C200C200C200C200C200C200C200C2008&param1=ZmRwLjFfMTkyNDQyMTNORQ==&unique=1677495706&session=49305c2cf7bf8e5ab1ba6b83c8fc70df&hostname=139.28.41.7	2				3	0	2	1	0	0	1		warning	13
5,7-Dihydroxy-4-methylcoumarin	2107-76-8	organic	solid	192.17	Thermo Fisher	2020-02-18	https://sds.chemicalsafety.com/sds/pda/msds/getpdf.ashx?action=msdsdocument&auth=200C200C200C200C2008207A200D2078200C200C200C200C200C200C200C200C200C2008&param1=ZmRwLjFfMzkzODkyMTNORQ==&unique=1677495789&session=49305c2cf7bf8e5ab1ba6b83c8fc70df&hostname=139.28.41.7	3				4	1	2	1	0	0	1		warning	14
7,8-Dihydroxy-4-methylcoumarin	2107-77-9	organic	solid	192.17	Sigma-Aldrich	2022-10-03	https://sds.chemicalsafety.com/sds/pda/msds/getpdf.ashx?action=msdsdocument&auth=200C200C200C200C2008207A200D2078200C200C200C200C200C200C200C200C200C2008&param1=ZmRwLjFfMTc4NDI2MDNORQ==&unique=1677496832&session=49305c2cf7bf8e5ab1ba6b83c8fc70df&hostname=139.28.41.7	1.75	2.16667	0.721688	33.3087	2	1	1	0	0	0	1	1.33333	danger	9	10.6667
7,8-Dihydroxy-4-methylcoumarin	2107-77-9	organic	solid	192.17	Combi-Blocks	2021-12-09	https://sds.chemicalsafety.com/sds/pda/msds/getpdf.ashx?action=msdsdocument&auth=200C200C200C200C2008207A200D2078200C200C200C200C200C200C200C200C200C2008&param1=ZmRwLjFfOTAzOTUxMTNORQ==&unique=1677496928&session=49305c2cf7bf8e5ab1ba6b83c8fc70df&hostname=139.28.41.7	1.75				2	1	1	0	0	0	2		danger	9
7,8-Dihydroxy-4-methylcoumarin	2107-77-9	organic	solid	192.17	Thermo Fisher	2020-02-18	https://sds.chemicalsafety.com/sds/pda/msds/getpdf.ashx?action=msdsdocument&auth=200C200C200C200C2008207A200D2078200C200C200C200C200C200C200C200C200C2008&param1=ZmRwLjFfNTI3NzkyMTNORQ==&unique=1677497026&session=49305c2cf7bf8e5ab1ba6b83c8fc70df&hostname=139.28.41.7	3				4	1	2	1	0	0	1		warning	14
Acetanilide	103-84-4	organic	solid	135.16	Sigma-Aldrich	2022-10-02	https://sds.chemicalsafety.com/sds/pda/msds/getpdf.ashx?action=msdsdocument&auth=200C200C200C200C2008207A200D2078200C200C200C200C200C200C200C200C200C2008&param1=ZmRwLjJfNzk3NTM2MDNORQ==&unique=1676990972&session=23742bc2319efd3fb56ee581bcf57170&hostname=139.28.41.7	0.75	1.91667	2.46644	128.684	2	0	0	1	1	0	1	1.33333	warning	5	5
Acetanilide	103-84-4	organic	solid	135.16	Thermo Fisher	2020-02-14	https://sds.chemicalsafety.com/sds/pda/msds/getpdf.ashx?action=msdsdocument&auth=200C200C200C200C2008207A200D2078200C200C200C200C200C200C200C200C200C2008&param1=ZmRwLjFfMDk2NzkyMTNORQ==&unique=1676991098&session=23742bc2319efd3fb56ee581bcf57170&hostname=139.28.41.7	0.25				1	0	0	0	1	0	1		warning	5
Acetanilide	103-84-4	organic	solid	135.16	TCI America	2020-06-15	https://sds.chemicalsafety.com/sds/pda/msds/getpdf.ashx?action=msdsdocument&auth=200C200C200C200C2008207A200D2078200C200C200C200C200C200C200C200C200C2008&param1=ZmRwLjFfOTQzNjA1MjNORQ==&unique=1676991165&session=23742bc2319efd3fb56ee581bcf57170&hostname=139.28.41.7	4.75				7	2	2	2	1	0	2		danger
Acetonitrile	75-05-8	organic	liquid	41.05	Sigma-Aldrich	2022-10-19	https://sds.chemicalsafety.com/sds/pda/msds/getpdf.ashx?action=msdsdocument&auth=200C200C200C200C2008207A200D2078200C200C200C200C200C200C200C200C200C2008&param1=ZmRwLjRfNjk3NDgxMjNORQ==&unique=1676993904&session=23742bc2319efd3fb56ee581bcf57170&hostname=139.28.41.7	2.25	2.25	0	0	5	0	2	0	3	0	2	2	danger	20	16.6667
Acetonitrile	75-05-8	organic	liquid	41.05	Thermo Fisher	2020-02-14	https://sds.chemicalsafety.com/sds/pda/msds/getpdf.ashx?action=msdsdocument&auth=200C200C200C200C2008207A200D2078200C200C200C200C200C200C200C200C200C2008&param1=ZmRwLjFfMDUyODkyMTNORQ==&unique=1676994025&session=23742bc2319efd3fb56ee581bcf57170&hostname=139.28.41.7	2.25				5	0	2	0	3	0	2		danger	24
Acetonitrile	75-05-8	organic	liquid	41.05	PANREAC QUIMICA S.L.U.	2020-02-21	https://sds.chemicalsafety.com/sds/pda/msds/getpdf.ashx?action=msdsdocument&auth=200C200C200C200C2008207A200D2078200C200C200C200C200C200C200C200C200C2008&param1=ZmRwLjFfMzI2Nzg1MDNORQ==&unique=1676994634&session=23742bc2319efd3fb56ee581bcf57170&hostname=139.28.41.7	2.25				5	0	2	0	3	0	2		danger	6
α-Cyclodextrin	10016-20-3	organic	solid	972.84	Sigma-Aldrich	2022-04-04	https://sds.chemicalsafety.com/sds/pda/msds/getpdf.ashx?action=msdsdocument&auth=200C200C200C200C2008207A200D2078200C200C200C200C200C200C200C200C200C2008&param1=ZmRwLjFfMTE1ODgxMjNORQ==&unique=1677065345&session=21623f89b354e08589e0ade18e06e2bb&hostname=139.28.41.7	0.75	0.5	0.433013	86.6025	1	0	1	0	0	0	1	0.666667	warning	4	2
α-Cyclodextrin	10016-20-3	organic	solid	972.84	Thermo Fisher	2020-02-14	https://sds.chemicalsafety.com/sds/pda/msds/getpdf.ashx?action=msdsdocument&auth=200C200C200C200C2008207A200D2078200C200C200C200C200C200C200C200C200C2008&param1=ZmRwLjFfODM1NTkyMTNORQ==&unique=1677065503&session=21623f89b354e08589e0ade18e06e2bb&hostname=139.28.41.7	0				0	0	0	0	0	0	0		none	0
α-Cyclodextrin	10016-20-3	organic	solid	972.84	U. S. Pharmacopeia	2020-06-16	https://sds.chemicalsafety.com/sds/pda/msds/getpdf.ashx?action=msdsdocument&auth=200C200C200C200C2008207A200D2078200C200C200C200C200C200C200C200C200C2008&param1=ZmRwLjFfMDQ2NTQ1MjNORQ==&unique=1677065629&session=21623f89b354e08589e0ade18e06e2bb&hostname=139.28.41.7	0.75				1	0	1	0	0	0	1		warning
Ammonium sulfate	7783-20-2	inorganic	solid	132.14	Sigma-Aldrich	2021-12-15	https://sds.chemicalsafety.com/sds/pda/msds/getpdf.ashx?action=msdsdocument&auth=200C200C200C200C2008207A200D2078200C200C200C200C200C200C200C200C200C2008&param1=ZmRwLjFfMDc5NDgxMjNORQ==&unique=1677071813&session=6ea14deee4aa445e7572ca8b582550dc&hostname=139.28.41.7	0.5	0.166667	0.288675	173.205	1	0	0	1	0	0	0	0	none	2	0.666667
Ammonium sulfate	7783-20-2	inorganic	solid	132.14	Thermo Fisher	2020-02-14	https://sds.chemicalsafety.com/sds/pda/msds/getpdf.ashx?action=msdsdocument&auth=200C200C200C200C2008207A200D2078200C200C200C200C200C200C200C200C200C2008&param1=ZmRwLjFfOTkwMDAzMTNORQ==&unique=1677071958&session=6ea14deee4aa445e7572ca8b582550dc&hostname=139.28.41.7	0				0	0	0	0	0	0	0		none	0
Ammonium sulfate	7783-20-2	inorganic	solid	132.14	Bio-Rad Laboratories	2020-03-19	https://sds.chemicalsafety.com/sds/pda/msds/getpdf.ashx?action=msdsdocument&auth=200C200C200C200C2008207A200D2078200C200C200C200C200C200C200C200C200C2008&param1=ZmRwLjFfNzE2NzI5MDNORQ==&unique=1677072024&session=6ea14deee4aa445e7572ca8b582550dc&hostname=139.28.41.7	0				0	0	0	0	0	0	0		none	0
Amoxicillin trihydrate	61336-70-7	organic	solid	419.5	Sigma-Aldrich	2021-12-16	https://sds.chemicalsafety.com/sds/pda/msds/getpdf.ashx?action=msdsdocument&auth=200C200C200C200C2008207A200D2078200C200C200C200C200C200C200C200C200C2008&param1=ZmRwLjFfMDY4MjE0MDNORQ==&unique=1677072208&session=6ea14deee4aa445e7572ca8b582550dc&hostname=139.28.41.7	2	1.33333	1.1547	86.6025	2	2	0	0	0	0	1	0.666667	danger	10	6.66667
Amoxicillin trihydrate	61336-70-7	organic	solid	419.5	Thermo Fisher	2020-02-19	https://sds.chemicalsafety.com/sds/pda/msds/getpdf.ashx?action=msdsdocument&auth=200C200C200C200C2008207A200D2078200C200C200C200C200C200C200C200C200C2008&param1=ZmRwLjFfMTk2NDkyMTNORQ==&unique=1677072312&session=6ea14deee4aa445e7572ca8b582550dc&hostname=139.28.41.7	2				2	2	0	0	0	0	1		danger	10
Amoxicillin trihydrate	61336-70-7	organic	solid	419.5	TCI America	2020-06-15	https://sds.chemicalsafety.com/sds/pda/msds/getpdf.ashx?action=msdsdocument&auth=200C200C200C200C2008207A200D2078200C200C200C200C200C200C200C200C200C2008&param1=ZmRwLjFfOTI0NDQ1MjNORQ==&unique=1677072381&session=6ea14deee4aa445e7572ca8b582550dc&hostname=139.28.41.7	0				0	0	0	0	0	0	0		none	0
Aniline	62-53-3	organic	liquid	93.13	Sigma-Aldrich	2022-01-24	https://sds.chemicalsafety.com/sds/pda/msds/getpdf.ashx?action=msdsdocument&auth=200C200C200C200C2008207A200D2078200C200C200C200C200C200C200C200C200C2008&param1=ZmRwLjFfNzcyODg2MDNORQ==&unique=1677072749&session=6ea14deee4aa445e7572ca8b582550dc&hostname=139.28.41.7	8.25	8.33333	0.381881	4.58258	11	5	2	3	1	0	5	3.66667	danger	23	25
Aniline	62-53-3	organic	liquid	93.13	Thermo Fisher	2020-02-14	https://sds.chemicalsafety.com/sds/pda/msds/getpdf.ashx?action=msdsdocument&auth=200C200C200C200C2008207A200D2078200C200C200C200C200C200C200C200C200C2008&param1=ZmRwLjFfMjM1ODkyMTNORQ==&unique=1677072877&session=6ea14deee4aa445e7572ca8b582550dc&hostname=139.28.41.7	8.75				12	5	2	4	1	0	3		danger	27
Aniline	62-53-3	organic	liquid	93.13	Avantor Performance Materials	2020-01-22	https://sds.chemicalsafety.com/sds/pda/msds/getpdf.ashx?action=msdsdocument&auth=200C200C200C200C2008207A200D2078200C200C200C200C200C200C200C200C200C2008&param1=ZmRwLjFfOTA1MjkxMDNORQ==&unique=1677073019&session=6ea14deee4aa445e7572ca8b582550dc&hostname=139.28.41.7	8				11	4	3	3	1	0	3		danger
Anisole	100-66-3	organic	liquid	108.14	Sigma-Aldrich	2021-10-08	https://sds.chemicalsafety.com/sds/pda/msds/getpdf.ashx?action=msdsdocument&auth=200C200C200C200C2008207A200D2078200C200C200C200C200C200C200C200C200C2008&param1=ZmRwLjFfNzQyNjgxMjNORQ==&unique=1677073222&session=6ea14deee4aa445e7572ca8b582550dc&hostname=139.28.41.7	1.75	1.66667	0.381881	22.9129	3	0	1	2	0	0	2	2	danger	17	17
Anisole	100-66-3	organic	liquid	108.14	Thermo Fisher	2020-02-14	https://sds.chemicalsafety.com/sds/pda/msds/getpdf.ashx?action=msdsdocument&auth=200C200C200C200C2008207A200D2078200C200C200C200C200C200C200C200C200C2008&param1=ZmRwLjFfMjg3ODkyMTNORQ==&unique=1677073335&session=6ea14deee4aa445e7572ca8b582550dc&hostname=139.28.41.7	2				3	1	0	2	0	0	2		warning	17
Anisole	100-66-3	organic	liquid	108.14	U. S. Pharmacopeia	2022-12-28	https://sds.chemicalsafety.com/sds/pda/msds/getpdf.ashx?action=msdsdocument&auth=200C200C200C200C2008207A200D2078200C200C200C200C200C200C200C200C200C2008&param1=ZmRwLjFfNjQ0NzQ1MjNORQ==&unique=1677073410&session=6ea14deee4aa445e7572ca8b582550dc&hostname=139.28.41.7	1.25				2	0	1	1	0	0	2		warning
Benzyl alcohol	100-51-6	organic	liquid	108.14	Sigma-Aldrich	2021-11-25	https://sds.chemicalsafety.com/sds/pda/msds/getpdf.ashx?action=msdsdocument&auth=200C200C200C200C2008207A200D2078200C200C200C200C200C200C200C200C200C2008&param1=ZmRwLjJfMDMwNTgxMjNORQ==&unique=1677108749&session=6ea14deee4aa445e7572ca8b582550dc&hostname=139.28.41.7	1.25	1	0.433013	43.3013	3	0	1	0	2	0	1	1	warning	10	11.5
Benzyl alcohol	100-51-6	organic	liquid	108.14	Thermo Fisher	2022-06-23	https://sds.chemicalsafety.com/sds/pda/msds/getpdf.ashx?action=msdsdocument&auth=200C200C200C200C2008207A200D2078200C200C200C200C200C200C200C200C200C2008&param1=ZmRwLjFfNTg2MDAzMTNORQ==&unique=1677108866&session=6ea14deee4aa445e7572ca8b582550dc&hostname=139.28.41.7	1.25				3	0	1	0	2	0	1		warning	13
Benzyl alcohol	100-51-6	organic	liquid	108.14	Avantor Performance Materials	2020-04-28	https://sds.chemicalsafety.com/sds/pda/msds/getpdf.ashx?action=msdsdocument&auth=200C200C200C200C2008207A200D2078200C200C200C200C200C200C200C200C200C2008&param1=ZmRwLjFfMTE4MTkxMDNORQ==&unique=1677108996&session=6ea14deee4aa445e7572ca8b582550dc&hostname=139.28.41.7	0.5				2	0	0	0	2	0	1		warning
Benzyl isobutyrate	103-28-6	organic	liquid	178.23	Sigma-Aldrich	2022-11-15	https://sds.chemicalsafety.com/sds/pda/msds/getpdf.ashx?action=msdsdocument&auth=200C200C200C200C2008207A200D2078200C200C200C200C200C200C200C200C200C2008&param1=ZmRwLjFfMzc1OTgxMjNORQ==&unique=1677148713&session=10158fc67466c96792c3f504b6473b73&hostname=139.28.41.7	0.5	0.333333	0.288675	86.6025	1	0	0	1	0	0	1	0.666667	warning	11	7.33333
Benzyl isobutyrate	103-28-6	organic	liquid	178.23	Thermo Fisher	2020-02-14	https://sds.chemicalsafety.com/sds/pda/msds/getpdf.ashx?action=msdsdocument&auth=200C200C200C200C2008207A200D2078200C200C200C200C200C200C200C200C200C2008&param1=ZmRwLjFfMDQzODkyMTNORQ==&unique=1677148856&session=10158fc67466c96792c3f504b6473b73&hostname=139.28.41.7	0				0	0	0	0	0	0	0		none	0
Benzyl isobutyrate	103-28-6	organic	liquid	178.23	Combi-Blocks	2020-09-28	https://sds.chemicalsafety.com/sds/pda/msds/getpdf.ashx?action=msdsdocument&auth=200C200C200C200C2008207A200D2078200C200C200C200C200C200C200C200C200C2008&param1=ZmRwLjFfMjMzMjYxMTNORQ==&unique=1677148897&session=10158fc67466c96792c3f504b6473b73&hostname=139.28.41.7	0.5				1	0	0	1	0	0	1		warning	11
Butylbenzene	104-51-8	organic	liquid	134.22	Sigma-Aldrich	2022-11-21	https://sds.chemicalsafety.com/sds/pda/msds/getpdf.ashx?action=msdsdocument&auth=200C200C200C200C2008207A200D2078200C200C200C200C200C200C200C200C200C2008&param1=ZmRwLjFfNDE2NTMwMDNORQ==&unique=1677150781&session=10158fc67466c96792c3f504b6473b73&hostname=139.28.41.7	0.5	0.833333	0.57735	69.282	1	0	0	1	0	0	1	1.33333	warning	11	11.6667
Butylbenzene	104-51-8	organic	liquid	134.22	Thermo Fisher	2020-02-14	https://sds.chemicalsafety.com/sds/pda/msds/getpdf.ashx?action=msdsdocument&auth=200C200C200C200C2008207A200D2078200C200C200C200C200C200C200C200C200C2008&param1=ZmRwLjFfODA3NTAzMTNORQ==&unique=1677150885&session=10158fc67466c96792c3f504b6473b73&hostname=139.28.41.7	0.5				1	0	0	1	0	0	1		warning	11
Butylbenzene	104-51-8	organic	liquid	134.22	Combi-Blocks	2020-01-29	https://sds.chemicalsafety.com/sds/pda/msds/getpdf.ashx?action=msdsdocument&auth=200C200C200C200C2008207A200D2078200C200C200C200C200C200C200C200C200C2008&param1=ZmRwLjFfODQ4MTcxMTNORQ==&unique=1677151384&session=10158fc67466c96792c3f504b6473b73&hostname=139.28.41.7	1.5				2	1	0	1	0	0	2		warning	13
Chlorhexidine	55-56-1	organic	solid	505.45	Sigma-Aldrich	2021-04-26	https://sds.chemicalsafety.com/sds/pda/msds/getpdf.ashx?action=msdsdocument&auth=200C200C200C200C2008207A200D2078200C200C200C200C200C200C200C200C200C2008&param1=ZmRwLjFfMTYyMTQ2MDNORQ==&unique=1677534712&session=f99c59d06bf130d9b71feb3ce96b8ec3&hostname=139.28.41.7	3	2.66667	1.52753	57.2822	3	3	0	0	0	0	2	2	danger	5	10.5
Chlorhexidine	55-56-1	organic	solid	505.45	Combi-Blocks	2020-12-22	https://sds.chemicalsafety.com/sds/pda/msds/getpdf.ashx?action=msdsdocument&auth=200C200C200C200C2008207A200D2078200C200C200C200C200C200C200C200C200C2008&param1=ZmRwLjFfNzE5OTYxMTNORQ==&unique=1677534800&session=f99c59d06bf130d9b71feb3ce96b8ec3&hostname=139.28.41.7	4				5	2	2	1	0	0	3		danger	16
Chlorhexidine	55-56-1	organic	solid	505.45	U. S. Pharmacopeia	2021-03-01	https://sds.chemicalsafety.com/sds/pda/msds/getpdf.ashx?action=msdsdocument&auth=200C200C200C200C2008207A200D2078200C200C200C200C200C200C200C200C200C2008&param1=ZmRwLjFfMDA2NTQ1MjNORQ==&unique=1677534861&session=f99c59d06bf130d9b71feb3ce96b8ec3&hostname=139.28.41.7	1				1	1	0	0	0	0	1		danger
Clomipramine hydrochloride	17321-77-6	organic	solid	351.31	Sigma-Aldrich	2022-04-21	https://sds.chemicalsafety.com/sds/pda/msds/getpdf.ashx?action=msdsdocument&auth=200C200C200C200C2008207A200D2078200C200C200C200C200C200C200C200C200C2008&param1=ZmRwLjFfNzc2MTYzMjNORQ==&unique=1677165952&session=10158fc67466c96792c3f504b6473b73&hostname=139.28.41.7	3.75	3.08333	1.1547	37.4497	5	3	0	1	1	0	3	2.33333	danger	12	15.3333
Clomipramine hydrochloride	17321-77-6	organic	solid	351.31	Thermo Fisher	2020-02-18	https://sds.chemicalsafety.com/sds/pda/msds/getpdf.ashx?action=msdsdocument&auth=200C200C200C200C2008207A200D2078200C200C200C200C200C200C200C200C200C2008&param1=ZmRwLjFfNTQwOTkyMTNORQ==&unique=1677166057&session=10158fc67466c96792c3f504b6473b73&hostname=139.28.41.7	1.75				4	1	0	0	3	0	2		danger	16
Clomipramine hydrochloride	17321-77-6	organic	solid	351.31	Combi-Blocks	2022-01-14	https://sds.chemicalsafety.com/sds/pda/msds/getpdf.ashx?action=msdsdocument&auth=200C200C200C200C2008207A200D2078200C200C200C200C200C200C200C200C200C2008&param1=ZmRwLjFfNjAwNDMxMjNORQ==&unique=1677166109&session=10158fc67466c96792c3f504b6473b73&hostname=139.28.41.7	3.75				7	1	2	1	3	0	2		warning	18
Crystal Violet	548-62-9	organic	solid	407.98	Sigma-Aldrich	2021-07-16	https://sds.chemicalsafety.com/sds/pda/msds/getpdf.ashx?action=msdsdocument&auth=200C200C200C200C2008207A200D2078200C200C200C200C200C200C200C200C200C2008&param1=ZmRwLjFfMzM3MzgxMjNORQ==&unique=1677498238&session=49305c2cf7bf8e5ab1ba6b83c8fc70df&hostname=139.28.41.7	4	3	1	33.3333	5	3	1	0	1	0	4	3.66667	danger	12	12.3333
Crystal Violet	548-62-9	organic	solid	407.98	Thermo Fisher	2020-02-14	https://sds.chemicalsafety.com/sds/pda/msds/getpdf.ashx?action=msdsdocument&auth=200C200C200C200C2008207A200D2078200C200C200C200C200C200C200C200C200C2008&param1=ZmRwLjFfMTkxMDAzMTNORQ==&unique=1677498339&session=49305c2cf7bf8e5ab1ba6b83c8fc70df&hostname=139.28.41.7	2				3	1	1	0	1	0	3		danger	12
Crystal Violet	548-62-9	organic	solid	407.98	Combi-Blocks	2020-01-29	https://sds.chemicalsafety.com/sds/pda/msds/getpdf.ashx?action=msdsdocument&auth=200C200C200C200C2008207A200D2078200C200C200C200C200C200C200C200C200C2008&param1=ZmRwLjFfNjc3NTUxMTNORQ==&unique=1677498199&session=49305c2cf7bf8e5ab1ba6b83c8fc70df&hostname=139.28.41.7	3				4	2	1	0	1	0	4		danger	13
Desipramine hydrochloride	58-28-6	organic	solid	302.84	Sigma-Aldrich	2022-08-28	https://sds.chemicalsafety.com/sds/pda/msds/getpdf.ashx?action=msdsdocument&auth=200C200C200C200C2008207A200D2078200C200C200C200C200C200C200C200C200C2008&param1=ZmRwLjFfNzQ3NjIzMjNORQ==&unique=1677499165&session=49305c2cf7bf8e5ab1ba6b83c8fc70df&hostname=139.28.41.7	4.25	3.08333	2.02073	65.5371	6	2	2	1	1	0	2	1.66667	danger	18	19
Desipramine hydrochloride	58-28-6	organic	solid	302.84	Combi-Blocks	2021-12-14	https://sds.chemicalsafety.com/sds/pda/msds/getpdf.ashx?action=msdsdocument&auth=200C200C200C200C2008207A200D2078200C200C200C200C200C200C200C200C200C2008&param1=ZmRwLjFfMzkxMTcxMTNORQ==&unique=1677499267&session=49305c2cf7bf8e5ab1ba6b83c8fc70df&hostname=139.28.41.7	4.25				6	2	2	1	1	0	2		danger	20
Desipramine hydrochloride	58-28-6	organic	solid	302.84	U. S. Pharmacopeia	2022-11-14	https://sds.chemicalsafety.com/sds/pda/msds/getpdf.ashx?action=msdsdocument&auth=200C200C200C200C2008207A200D2078200C200C200C200C200C200C200C200C200C2008&param1=ZmRwLjFfOTQ3NTQ1MjNORQ==&unique=1677499359&session=49305c2cf7bf8e5ab1ba6b83c8fc70df&hostname=139.28.41.7	0.75				2	0	0	1	1	0	1		warning
D-Glucuronic acid	6556-12-3	organic	solid	194.14	Sigma-Aldrich	2022-03-26	https://sds.chemicalsafety.com/sds/pda/msds/getpdf.ashx?action=msdsdocument&auth=200C200C200C200C2008207A200D2078200C200C200C200C200C200C200C200C200C2008&param1=ZmRwLjFfNjY4MTcwMDNORQ==&unique=1677499717&session=49305c2cf7bf8e5ab1ba6b83c8fc70df&hostname=139.28.41.7	0	0	0	0	0	0	0	0	0	0	0	0	none	0	0
D-Glucuronic acid	6556-12-3	organic	solid	194.14	Combi-Blocks	2022-01-22	https://sds.chemicalsafety.com/sds/pda/msds/getpdf.ashx?action=msdsdocument&auth=200C200C200C200C2008207A200D2078200C200C200C200C200C200C200C200C200C2008&param1=ZmRwLjFfMTIwMTMxMTNORQ==&unique=1677499906&session=49305c2cf7bf8e5ab1ba6b83c8fc70df&hostname=139.28.41.7	0				0	0	0	0	0	0	0		none	0
D-Glucuronic acid	6556-12-3	organic	solid	194.14	Thermo Fisher	2020-02-14	https://sds.chemicalsafety.com/sds/pda/msds/getpdf.ashx?action=msdsdocument&auth=200C200C200C200C2008207A200D2078200C200C200C200C200C200C200C200C200C2008&param1=ZmRwLjFfNjU3OTkyMTNORQ==&unique=1677499949&session=49305c2cf7bf8e5ab1ba6b83c8fc70df&hostname=139.28.41.7	0				0	0	0	0	0	0	0		none	0
Dichloromethane	75-09-2	organic	liquid	84.93	Sigma-Aldrich	2022-08-08	https://sds.chemicalsafety.com/sds/pda/msds/getpdf.ashx?action=msdsdocument&auth=200C200C200C200C2008207A200D2078200C200C200C200C200C200C200C200C200C2008&param1=ZmRwLjFfOTg0NzI0MDNORQ==&unique=1677500333&session=49305c2cf7bf8e5ab1ba6b83c8fc70df&hostname=139.28.41.7	2.75	3.08333	2.51661	81.6198	4	0	3	1	0	0	2	1.66667	warning	16	13
Dichloromethane	75-09-2	organic	liquid	84.93	PANREAC QUIMICA S.L.U.	2020-07-15	https://sds.chemicalsafety.com/sds/pda/msds/getpdf.ashx?action=msdsdocument&auth=200C200C200C200C2008207A200D2078200C200C200C200C200C200C200C200C200C2008&param1=ZmRwLjFfODQ5Nzg1MDNORQ==&unique=1677500459&session=49305c2cf7bf8e5ab1ba6b83c8fc70df&hostname=139.28.41.7	0.75				1	0	1	0	0	0	1		warning	6
Dichloromethane	75-09-2	organic	liquid	84.93	Thermo Fisher	2020-02-29	https://sds.chemicalsafety.com/sds/pda/msds/getpdf.ashx?action=msdsdocument&auth=200C200C200C200C2008207A200D2078200C200C200C200C200C200C200C200C200C2008&param1=ZmRwLjFfMzEyMDAzMTNORQ==&unique=1677500534&session=49305c2cf7bf8e5ab1ba6b83c8fc70df&hostname=139.28.41.7	5.75				7	3	3	1	0	0	2		danger	17
Diethylene glycol	111-46-6	organic	liquid	106.12	Sigma-Aldrich	2022-04-11	https://sds.chemicalsafety.com/sds/pda/msds/getpdf.ashx?action=msdsdocument&auth=200C200C200C200C2008207A200D2078200C200C200C200C200C200C200C200C200C2008&param1=ZmRwLjFfODY5MzgxMjNORQ==&unique=1677532333&session=f99c59d06bf130d9b71feb3ce96b8ec3&hostname=139.28.41.7	0.25	0.25	0	0	1	0	0	0	1	0	1	1	warning	4	4.66667
Diethylene glycol	111-46-6	organic	liquid	106.12	Thermo Fisher	2022-11-02	https://sds.chemicalsafety.com/sds/pda/msds/getpdf.ashx?action=msdsdocument&auth=200C200C200C200C2008207A200D2078200C200C200C200C200C200C200C200C200C2008&param1=ZmRwLjFfNTYwMDAzMTNORQ==&unique=1677532504&session=f99c59d06bf130d9b71feb3ce96b8ec3&hostname=139.28.41.7	0.25				1	0	0	0	1	0	1		warning	5
Diethylene glycol	111-46-6	organic	liquid	106.12	Shell Chemical LP	2021-07-09	https://sds.chemicalsafety.com/sds/pda/msds/getpdf.ashx?action=msdsdocument&auth=200C200C200C200C2008207A200D2078200C200C200C200C200C200C200C200C200C2008&param1=ZmRwLjFfMjk1Njk1MDNORQ==&unique=1677532578&session=f99c59d06bf130d9b71feb3ce96b8ec3&hostname=139.28.41.7	0.25				1	0	0	0	1	0	1		warning	5
Dimethyl sulfoxide	67-68-5	organic	liquid	78.13	Sigma-Aldrich	2022-10-29	https://sds.chemicalsafety.com/sds/pda/msds/getpdf.ashx?action=msdsdocument&auth=200C200C200C200C2008207A200D2078200C200C200C200C200C200C200C200C200C2008&param1=ZmRwLjFfNzU1MjgwMDNORQ==&unique=1677532939&session=f99c59d06bf130d9b71feb3ce96b8ec3&hostname=139.28.41.7	0.25	0.166667	0.144338	86.6025	1	0	0	0	1	0	0	0	warning	5	3
Dimethyl sulfoxide	67-68-5	organic	liquid	78.13	Thermo Fisher	2021-07-23	https://sds.chemicalsafety.com/sds/pda/msds/getpdf.ashx?action=msdsdocument&auth=200C200C200C200C2008207A200D2078200C200C200C200C200C200C200C200C200C2008&param1=ZmRwLjFfODMzMjAzMTNORQ==&unique=1677533034&session=f99c59d06bf130d9b71feb3ce96b8ec3&hostname=139.28.41.7	0.25				1	0	0	0	1	0	0		warning	4
Dimethyl sulfoxide	67-68-5	organic	liquid	78.13	AppliChem GmbH	2021-03-02	https://sds.chemicalsafety.com/sds/pda/msds/getpdf.ashx?action=msdsdocument&auth=200C200C200C200C2008207A200D2078200C200C200C200C200C200C200C200C200C2008&param1=ZmRwLjFfMjE2Njg1MDNORQ==&unique=1677533115&session=f99c59d06bf130d9b71feb3ce96b8ec3&hostname=139.28.41.7	0				0	0	0	0	0	0	0		none	0
Diphenylamine	122-39-4	organic	solid	169.22	Sigma-Aldrich	2022-08-19	https://sds.chemicalsafety.com/sds/pda/msds/getpdf.ashx?action=msdsdocument&auth=200C200C200C200C2008207A200D2078200C200C200C200C200C200C200C200C200C2008&param1=ZmRwLjFfNzU2NDkxMjNORQ==&unique=1677533262&session=f99c59d06bf130d9b71feb3ce96b8ec3&hostname=139.28.41.7	4.25	3.91667	0.57735	14.7409	6	2	1	3	0	0	3	2.66667	danger	15	13
Diphenylamine	122-39-4	organic	solid	169.22	Thermo Fisher	2020-02-14	https://sds.chemicalsafety.com/sds/pda/msds/getpdf.ashx?action=msdsdocument&auth=200C200C200C200C2008207A200D2078200C200C200C200C200C200C200C200C200C2008&param1=ZmRwLjFfMDM3MDAzMTNORQ==&unique=1677533381&session=f99c59d06bf130d9b71feb3ce96b8ec3&hostname=139.28.41.7	3.25				5	1	1	3	0	0	2		danger	17
Diphenylamine	122-39-4	organic	solid	169.22	PANREAC QUIMICA S.L.U.	2021-04-05	https://sds.chemicalsafety.com/sds/pda/msds/getpdf.ashx?action=msdsdocument&auth=200C200C200C200C2008207A200D2078200C200C200C200C200C200C200C200C200C2008&param1=ZmRwLjFfNDIwNzg1MDNORQ==&unique=1677533492&session=f99c59d06bf130d9b71feb3ce96b8ec3&hostname=139.28.41.7	4.25				6	2	1	3	0	0	3		danger	7
Doxepin hydrochloride	1229-29-4	organic	solid	315.84	Sigma-Aldrich	2022-10-02	https://sds.chemicalsafety.com/sds/pda/msds/getpdf.ashx?action=msdsdocument&auth=200C200C200C200C2008207A200D2078200C200C200C200C200C200C200C200C200C2008&param1=ZmRwLjFfNDc3MjMzMjNORQ==&unique=1677534151&session=f99c59d06bf130d9b71feb3ce96b8ec3&hostname=139.28.41.7	0.5	0.75	0.433013	57.735	1	0	0	1	0	0	1	1.33333	danger	7	7.33333
Doxepin hydrochloride	1229-29-4	organic	solid	315.84	Combi-Blocks	2022-01-14	https://sds.chemicalsafety.com/sds/pda/msds/getpdf.ashx?action=msdsdocument&auth=200C200C200C200C2008207A200D2078200C200C200C200C200C200C200C200C200C2008&param1=ZmRwLjFfMzY5NzMxMjNORQ==&unique=1677534243&session=f99c59d06bf130d9b71feb3ce96b8ec3&hostname=139.28.41.7	0.5				1	0	0	1	0	0	1		danger	5
Doxepin hydrochloride	1229-29-4	organic	solid	315.84	Thermo Fisher	2020-02-18	https://sds.chemicalsafety.com/sds/pda/msds/getpdf.ashx?action=msdsdocument&auth=200C200C200C200C2008207A200D2078200C200C200C200C200C200C200C200C200C2008&param1=ZmRwLjFfNjA4MTAzMTNORQ==&unique=1677534305&session=f99c59d06bf130d9b71feb3ce96b8ec3&hostname=139.28.41.7	1.25				2	0	1	1	0	0	2		danger	10
Doxycycline hyclate	24390-14-5	organic	solid	512.94	Sigma-Aldrich	2022-10-17	https://sds.chemicalsafety.com/sds/pda/msds/getpdf.ashx?action=msdsdocument&auth=200C200C200C200C2008207A200D2078200C200C200C200C200C200C200C200C200C2008&param1=ZmRwLjFfNzAwNjczMjNORQ==&unique=1677534391&session=f99c59d06bf130d9b71feb3ce96b8ec3&hostname=139.28.41.7	3.5	2.83333	1.60728	56.7274	6	0	3	2	1	0	2	2	warning	19	19.5
Doxycycline hyclate	24390-14-5	organic	solid	512.94	Thermo Fisher	2020-02-14	https://sds.chemicalsafety.com/sds/pda/msds/getpdf.ashx?action=msdsdocument&auth=200C200C200C200C2008207A200D2078200C200C200C200C200C200C200C200C200C2008&param1=ZmRwLjFfNDk3MjAzMTNORQ==&unique=1677534502&session=f99c59d06bf130d9b71feb3ce96b8ec3&hostname=139.28.41.7	4				6	1	3	1	1	0	2		warning	20
Doxycycline hyclate	24390-14-5	organic	solid	512.94	U. S. Pharmacopeia	2021-02-25	https://sds.chemicalsafety.com/sds/pda/msds/getpdf.ashx?action=msdsdocument&auth=200C200C200C200C2008207A200D2078200C200C200C200C200C200C200C200C200C2008&param1=ZmRwLjFfMDk0NjQ1MjNORQ==&unique=1677534560&session=f99c59d06bf130d9b71feb3ce96b8ec3&hostname=139.28.41.7	1				2	0	1	0	1	0	2		warning
Ethyl acetate	141-78-6	organic	liquid	88.11	Sigma-Aldrich	2022-12-19	https://sds.chemicalsafety.com/sds/pda/msds/getpdf.ashx?action=msdsdocument&auth=200C200C200C200C2008207A200D2078200C200C200C200C200C200C200C200C200C2008&param1=ZmRwLjFfNjgzNzUwMDNORQ==&unique=1677536643&session=f99c59d06bf130d9b71feb3ce96b8ec3&hostname=139.28.41.7	2	2.33333	0.57735	24.7436	3	0	2	1	0	0	2	2	danger	19	15.3333
Ethyl acetate	141-78-6	organic	liquid	88.11	Thermo Fisher	2020-02-14	https://sds.chemicalsafety.com/sds/pda/msds/getpdf.ashx?action=msdsdocument&auth=200C200C200C200C2008207A200D2078200C200C200C200C200C200C200C200C200C2008&param1=ZmRwLjFfOTc1NDAzMTNORQ==&unique=1677536670&session=f99c59d06bf130d9b71feb3ce96b8ec3&hostname=139.28.41.7	3				4	1	2	1	0	0	2		danger	21
Ethyl acetate	141-78-6	organic	liquid	88.11	PANREAC QUIMICA S.L.U.	2020-06-07	https://sds.chemicalsafety.com/sds/pda/msds/getpdf.ashx?action=msdsdocument&auth=200C200C200C200C2008207A200D2078200C200C200C200C200C200C200C200C200C2008&param1=ZmRwLjFfNzQ5Nzg1MDNORQ==&unique=1677536719&session=f99c59d06bf130d9b71feb3ce96b8ec3&hostname=139.28.41.7	2				3	0	2	1	0	0	2		danger	6
Ethyl benzoate	93-89-0	organic	liquid	150.17	Sigma-Aldrich	2022-03-10	https://sds.chemicalsafety.com/sds/pda/msds/getpdf.ashx?action=msdsdocument&auth=200C200C200C200C2008207A200D2078200C200C200C200C200C200C200C200C200C2008&param1=ZmRwLjFfMzE0MDYwMDNORQ==&unique=1677581007&session=2769514b688cb754cd0d8f1507d36947&hostname=139.28.41.7	1	1.08333	0.877971	81.0435	2	0	1	0	1	0	0	0.333333	warning	6	8
Ethyl benzoate	93-89-0	organic	liquid	150.17	Thermo Fisher	2021-06-23	https://sds.chemicalsafety.com/sds/pda/msds/getpdf.ashx?action=msdsdocument&auth=200C200C200C200C2008207A200D2078200C200C200C200C200C200C200C200C200C2008&param1=ZmRwLjFfODcyNDAzMTNORQ==&unique=1677581111&session=2769514b688cb754cd0d8f1507d36947&hostname=139.28.41.7	0.25				1	0	0	0	1	0	0		warning	5
Ethyl benzoate	93-89-0	organic	liquid	150.17	Combi-Blocks	2023-01-02	https://sds.chemicalsafety.com/sds/pda/msds/getpdf.ashx?action=msdsdocument&auth=200C200C200C200C2008207A200D2078200C200C200C200C200C200C200C200C200C2008&param1=ZmRwLjFfMDUzOTUxMTNORQ==&unique=1677581168&session=2769514b688cb754cd0d8f1507d36947&hostname=139.28.41.7	2				3	0	2	1	0	0	1		warning	13
Ethyl butyrate	105-54-4	organic	liquid	116.16	Sigma-Aldrich	2021-09-15	https://sds.chemicalsafety.com/sds/pda/msds/getpdf.ashx?action=msdsdocument&auth=200C200C200C200C2008207A200D2078200C200C200C200C200C200C200C200C200C2008&param1=ZmRwLjFfNDI0MDYwMDNORQ==&unique=1677581351&session=2769514b688cb754cd0d8f1507d36947&hostname=139.28.41.7	1.25	1.5	0.901388	60.0925	2	0	1	1	0	0	2	2	warning	14	16.3333
Ethyl butyrate	105-54-4	organic	liquid	116.16	Thermo Fisher	2020-02-14	https://sds.chemicalsafety.com/sds/pda/msds/getpdf.ashx?action=msdsdocument&auth=200C200C200C200C2008207A200D2078200C200C200C200C200C200C200C200C200C2008&param1=ZmRwLjFfNzUyNDAzMTNORQ==&unique=1677581445&session=2769514b688cb754cd0d8f1507d36947&hostname=139.28.41.7	0.75				2	0	0	1	1	0	2		warning	15
Ethyl butyrate	105-54-4	organic	liquid	116.16	Combi-Blocks	2023-01-02	https://sds.chemicalsafety.com/sds/pda/msds/getpdf.ashx?action=msdsdocument&auth=200C200C200C200C2008207A200D2078200C200C200C200C200C200C200C200C200C2008&param1=ZmRwLjFfNzA2NDYxMTNORQ==&unique=1677581491&session=2769514b688cb754cd0d8f1507d36947&hostname=139.28.41.7	2.5				4	0	2	2	0	0	2		warning	20
Ethyl decanoate	110-38-3	organic	liquid	200.32	Sigma-Aldrich	2022-06-10	https://sds.chemicalsafety.com/sds/pda/msds/getpdf.ashx?action=msdsdocument&auth=200C200C200C200C2008207A200D2078200C200C200C200C200C200C200C200C200C2008&param1=ZmRwLjFfMzQ0MDYwMDNORQ==&unique=1677581629&session=2769514b688cb754cd0d8f1507d36947&hostname=139.28.41.7	0	0	0	0	0	0	0	0	0	0	0	0	none	0	0
Ethyl decanoate	110-38-3	organic	liquid	200.32	Thermo Fisher	2020-02-14	https://sds.chemicalsafety.com/sds/pda/msds/getpdf.ashx?action=msdsdocument&auth=200C200C200C200C2008207A200D2078200C200C200C200C200C200C200C200C200C2008&param1=ZmRwLjFfMTMzNjAzMTNORQ==&unique=1677581707&session=2769514b688cb754cd0d8f1507d36947&hostname=139.28.41.7	0				0	0	0	0	0	0	0		none	0
Ethyl decanoate	110-38-3	organic	liquid	200.32	Combi-Blocks	2023-01-02	https://sds.chemicalsafety.com/sds/pda/msds/getpdf.ashx?action=msdsdocument&auth=200C200C200C200C2008207A200D2078200C200C200C200C200C200C200C200C200C2008&param1=ZmRwLjFfOTI0NTYxMTNORQ==&unique=1677581737&session=2769514b688cb754cd0d8f1507d36947&hostname=139.28.41.7	0				0	0	0	0	0	0	0		none	0
Ethyl heptanoate	106-30-9	organic	liquid	158.24	Sigma-Aldrich	2022-06-10	https://sds.chemicalsafety.com/sds/pda/msds/getpdf.ashx?action=msdsdocument&auth=200C200C200C200C2008207A200D2078200C200C200C200C200C200C200C200C200C2008&param1=ZmRwLjFfNzY0MDYwMDNORQ==&unique=1677581850&session=2769514b688cb754cd0d8f1507d36947&hostname=139.28.41.7	0.25	1.16667	1.80854	155.018	1	0	0	0	1	0	0	0.333333	warning	5	7.33333
Ethyl heptanoate	106-30-9	organic	liquid	158.24	Thermo Fisher	2021-07-23	https://sds.chemicalsafety.com/sds/pda/msds/getpdf.ashx?action=msdsdocument&auth=200C200C200C200C2008207A200D2078200C200C200C200C200C200C200C200C200C2008&param1=ZmRwLjFfMzQxMTAzMTNORQ==&unique=1677581939&session=2769514b688cb754cd0d8f1507d36947&hostname=139.28.41.7	3.25				5	1	2	1	1	0	1		warning	17
Ethyl heptanoate	106-30-9	organic	liquid	158.24	Combi-Blocks	2023-01-02	https://sds.chemicalsafety.com/sds/pda/msds/getpdf.ashx?action=msdsdocument&auth=200C200C200C200C2008207A200D2078200C200C200C200C200C200C200C200C200C2008&param1=ZmRwLjFfODczMTYxMTNORQ==&unique=1677581999&session=2769514b688cb754cd0d8f1507d36947&hostname=139.28.41.7	0				0	0	0	0	0	0	0		none	0
Ethyl hexanoate	123-66-0	organic	liquid	144.21	Sigma-Aldrich	2022-11-15	https://sds.chemicalsafety.com/sds/pda/msds/getpdf.ashx?action=msdsdocument&auth=200C200C200C200C2008207A200D2078200C200C200C200C200C200C200C200C200C2008&param1=ZmRwLjFfOTY0MDYwMDNORQ==&unique=1677582083&session=2769514b688cb754cd0d8f1507d36947&hostname=139.28.41.7	0.5	1.16667	1.1547	98.9743	1	0	0	1	0	0	1	1.33333	warning	11	14
Ethyl hexanoate	123-66-0	organic	liquid	144.21	Thermo Fisher	2020-02-14	https://sds.chemicalsafety.com/sds/pda/msds/getpdf.ashx?action=msdsdocument&auth=200C200C200C200C2008207A200D2078200C200C200C200C200C200C200C200C200C2008&param1=ZmRwLjFfMTY4MDAzMTNORQ==&unique=1677582164&session=2769514b688cb754cd0d8f1507d36947&hostname=139.28.41.7	0.5				1	0	0	1	0	0	1		warning	11
Ethyl hexanoate	123-66-0	organic	liquid	144.21	Combi-Blocks	2023-01-02	https://sds.chemicalsafety.com/sds/pda/msds/getpdf.ashx?action=msdsdocument&auth=200C200C200C200C2008207A200D2078200C200C200C200C200C200C200C200C200C2008&param1=ZmRwLjFfMDA1OTUxMTNORQ==&unique=1677582206&session=2769514b688cb754cd0d8f1507d36947&hostname=139.28.41.7	2.5				4	0	2	2	0	0	2		warning	20
Ethyl levulinate	539-88-8	organic	liquid	144.17	Sigma-Aldrich	2022-05-27	https://sds.chemicalsafety.com/sds/pda/msds/getpdf.ashx?action=msdsdocument&auth=200C200C200C200C2008207A200D2078200C200C200C200C200C200C200C200C200C2008&param1=ZmRwLjFfMDk0MDYwMDNORQ==&unique=1677582339&session=2769514b688cb754cd0d8f1507d36947&hostname=139.28.41.7	1.5	1.83333	0.381881	20.8299	2	0	2	0	0	0	1	1	warning	7	11
Ethyl levulinate	539-88-8	organic	liquid	144.17	Thermo Fisher	2021-11-16	https://sds.chemicalsafety.com/sds/pda/msds/getpdf.ashx?action=msdsdocument&auth=200C200C200C200C2008207A200D2078200C200C200C200C200C200C200C200C200C2008&param1=ZmRwLjFfOTQ2MzAzMTNORQ==&unique=1677582474&session=2769514b688cb754cd0d8f1507d36947&hostname=139.28.41.7	1.75				3	0	2	0	1	0	1		warning	11
Ethyl levulinate	539-88-8	organic	liquid	144.17	Combi-Blocks	2023-01-02	https://sds.chemicalsafety.com/sds/pda/msds/getpdf.ashx?action=msdsdocument&auth=200C200C200C200C2008207A200D2078200C200C200C200C200C200C200C200C200C2008&param1=ZmRwLjFfOTUyOTUxMTNORQ==&unique=1677582526&session=2769514b688cb754cd0d8f1507d36947&hostname=139.28.41.7	2.25				4	0	2	1	1	0	1		warning	15
Ethyl propionate	105-37-3	organic	liquid	102.13	Sigma-Aldrich	2022-03-10	https://sds.chemicalsafety.com/sds/pda/msds/getpdf.ashx?action=msdsdocument&auth=200C200C200C200C2008207A200D2078200C200C200C200C200C200C200C200C200C2008&param1=ZmRwLjFfMjU1MDYwMDNORQ==&unique=1677582640&session=2769514b688cb754cd0d8f1507d36947&hostname=139.28.41.7	3.5	1.66667	1.58771	95.2628	5	0	4	1	0	0	2	1.33333	danger	22	14.6667
Ethyl propionate	105-37-3	organic	liquid	102.13	Thermo Fisher	2020-02-14	https://sds.chemicalsafety.com/sds/pda/msds/getpdf.ashx?action=msdsdocument&auth=200C200C200C200C2008207A200D2078200C200C200C200C200C200C200C200C200C2008&param1=ZmRwLjFfODkwMzAzMTNORQ==&unique=1677582788&session=2769514b688cb754cd0d8f1507d36947&hostname=139.28.41.7	0.75				1	0	1	0	0	0	1		danger	11
Ethyl propionate	105-37-3	organic	liquid	102.13	Combi-Blocks	2023-01-02	https://sds.chemicalsafety.com/sds/pda/msds/getpdf.ashx?action=msdsdocument&auth=200C200C200C200C2008207A200D2078200C200C200C200C200C200C200C200C200C2008&param1=ZmRwLjFfNjQ2NjUxMTNORQ==&unique=1677582843&session=2769514b688cb754cd0d8f1507d36947&hostname=139.28.41.7	0.75				1	0	1	0	0	0	1		danger	11
Ethyl valerate	539-82-2	organic	liquid	130.18	Sigma-Aldrich	2022-11-15	https://sds.chemicalsafety.com/sds/pda/msds/getpdf.ashx?action=msdsdocument&auth=200C200C200C200C2008207A200D2078200C200C200C200C200C200C200C200C200C2008&param1=ZmRwLjJfMTg1MDYwMDNORQ==&unique=1677582927&session=2769514b688cb754cd0d8f1507d36947&hostname=139.28.41.7	0.5	0.5	0	0	1	0	0	1	0	0	1	1	warning	11	11
Ethyl valerate	539-82-2	organic	liquid	130.18	Thermo Fisher	2020-02-14	https://sds.chemicalsafety.com/sds/pda/msds/getpdf.ashx?action=msdsdocument&auth=200C200C200C200C2008207A200D2078200C200C200C200C200C200C200C200C200C2008&param1=ZmRwLjFfMTY5MTAzMTNORQ==&unique=1677583003&session=2769514b688cb754cd0d8f1507d36947&hostname=139.28.41.7	0.5				1	0	0	1	0	0	1		warning	11
Ethyl valerate	539-82-2	organic	liquid	130.18	Combi-Blocks	2023-01-02	https://sds.chemicalsafety.com/sds/pda/msds/getpdf.ashx?action=msdsdocument&auth=200C200C200C200C2008207A200D2078200C200C200C200C200C200C200C200C200C2008&param1=ZmRwLjFfODcwMzYxMTNORQ==&unique=1677583055&session=2769514b688cb754cd0d8f1507d36947&hostname=139.28.41.7	0.5				1	0	0	1	0	0	1		warning	11
Ethylbenzene	100-41-4	organic	liquid	106.17	Sigma-Aldrich	2022-07-23	https://sds.chemicalsafety.com/sds/pda/msds/getpdf.ashx?action=msdsdocument&auth=200C200C200C200C2008207A200D2078200C200C200C200C200C200C200C200C200C2008&param1=ZmRwLjJfNjYxNDgxMjNORQ==&unique=1677583510&session=2769514b688cb754cd0d8f1507d36947&hostname=139.28.41.7	4.75	4.41667	0.381881	8.64637	7	1	4	1	1	0	3	2.66667	danger	21	22.3333
Ethylbenzene	100-41-4	organic	liquid	106.17	Combi-Blocks	2023-01-02	https://sds.chemicalsafety.com/sds/pda/msds/getpdf.ashx?action=msdsdocument&auth=200C200C200C200C2008207A200D2078200C200C200C200C200C200C200C200C200C2008&param1=ZmRwLjFfODU4NDUxMTNORQ==&unique=1677583629&session=2769514b688cb754cd0d8f1507d36947&hostname=139.28.41.7	4.5				7	1	3	2	1	0	2		danger	21
Ethylbenzene	100-41-4	organic	liquid	106.17	Shell Chemical LP	2020-12-23	https://sds.chemicalsafety.com/sds/pda/msds/getpdf.ashx?action=msdsdocument&auth=200C200C200C200C2008207A200D2078200C200C200C200C200C200C200C200C200C2008&param1=ZmRwLjFfNjM1Njk1MDNORQ==&unique=1677583734&session=2769514b688cb754cd0d8f1507d36947&hostname=139.28.41.7	4				8	1	4	2	1	0	3		danger	25
Eugenol	97-53-0	organic	liquid	164.20	Sigma-Aldrich	2022-05-13	https://sds.chemicalsafety.com/sds/pda/msds/getpdf.ashx?action=msdsdocument&auth=200C200C200C200C2008207A200D2078200C200C200C200C200C200C200C200C200C2008&param1=ZmRwLjFfNjMyMzQ2MDNORQ==&unique=1677584269&session=2769514b688cb754cd0d8f1507d36947&hostname=139.28.41.7	2.5	2.33333	0.520416	22.3036	3	1	2	0	0	0	1	1	warning	11	11.3333
Eugenol	97-53-0	organic	liquid	164.20	Thermo Fisher	2020-02-14	https://sds.chemicalsafety.com/sds/pda/msds/getpdf.ashx?action=msdsdocument&auth=200C200C200C200C2008207A200D2078200C200C200C200C200C200C200C200C200C2008&param1=ZmRwLjFfNTAwMTAzMTNORQ==&unique=1677584377&session=2769514b688cb754cd0d8f1507d36947&hostname=139.28.41.7	2.75				4	1	2	0	1	0	1		warning	13
Eugenol	97-53-0	organic	liquid	164.20	Combi-Blocks	2023-01-02	https://sds.chemicalsafety.com/sds/pda/msds/getpdf.ashx?action=msdsdocument&auth=200C200C200C200C2008207A200D2078200C200C200C200C200C200C200C200C200C2008&param1=ZmRwLjFfNTY0MTYxMTNORQ==&unique=1677584375&session=2769514b688cb754cd0d8f1507d36947&hostname=139.28.41.7	1.75				2	1	1	0	0	0	1		warning	10
Formamide	75-12-7	organic	liquid	45.04	Sigma-Aldrich	2022-07-22	https://sds.chemicalsafety.com/sds/pda/msds/getpdf.ashx?action=msdsdocument&auth=200C200C200C200C2008207A200D2078200C200C200C200C200C200C200C200C200C2008&param1=ZmRwLjFfMzU0NzM2MDNORQ==&unique=1677619184&session=2769514b688cb754cd0d8f1507d36947&hostname=139.28.41.7	2.5	2	1.80278	90.1388	3	1	2	0	0	0	1	0.666667	danger	7	4.66667
Formamide	75-12-7	organic	liquid	45.04	Thermo Fisher	2020-02-14	https://sds.chemicalsafety.com/sds/pda/msds/getpdf.ashx?action=msdsdocument&auth=200C200C200C200C2008207A200D2078200C200C200C200C200C200C200C200C200C2008&param1=ZmRwLjFfOTYwNDAzMTNORQ==&unique=1677619274&session=2769514b688cb754cd0d8f1507d36947&hostname=139.28.41.7	3.5				4	2	2	0	0	0	1		danger	7
Formamide	75-12-7	organic	liquid	45.04	Combi-Blocks	2023-01-02	https://sds.chemicalsafety.com/sds/pda/msds/getpdf.ashx?action=msdsdocument&auth=200C200C200C200C2008207A200D2078200C200C200C200C200C200C200C200C200C2008&param1=ZmRwLjFfNjk1MzUxMTNORQ==&unique=1677619332&session=2769514b688cb754cd0d8f1507d36947&hostname=139.28.41.7	0				0	0	0	0	0	0	0		none	0
Hexamethyldisiloxane	107-46-0	organic	liquid	162.38	Sigma-Aldrich	2022-03-12	https://sds.chemicalsafety.com/sds/pda/msds/getpdf.ashx?action=msdsdocument&auth=200C200C200C200C2008207A200D2078200C200C200C200C200C200C200C200C200C2008&param1=ZmRwLjJfMjY4MTI0MDNORQ==&unique=1677620120&session=2769514b688cb754cd0d8f1507d36947&hostname=139.28.41.7	2.75	1.75	1	57.1429	3	2	1	0	0	0	2	2	danger	13	14.6667
Hexamethyldisiloxane	107-46-0	organic	liquid	162.38	Thermo Fisher	2020-02-14	https://sds.chemicalsafety.com/sds/pda/msds/getpdf.ashx?action=msdsdocument&auth=200C200C200C200C2008207A200D2078200C200C200C200C200C200C200C200C200C2008&param1=ZmRwLjFfMjQ0NDAzMTNORQ==&unique=1677620236&session=2769514b688cb754cd0d8f1507d36947&hostname=139.28.41.7	0.75				1	0	1	0	0	0	2		danger	18
Hexamethyldisiloxane	107-46-0	organic	liquid	162.38	Combi-Blocks	2023-01-02	https://sds.chemicalsafety.com/sds/pda/msds/getpdf.ashx?action=msdsdocument&auth=200C200C200C200C2008207A200D2078200C200C200C200C200C200C200C200C200C2008&param1=ZmRwLjFfMjE5MjYxMTNORQ==&unique=1677620287&session=2769514b688cb754cd0d8f1507d36947&hostname=139.28.41.7	1.75				2	1	1	0	0	0	2		danger	13
Hexane	110-54-3	organic	liquid	86.18	Sigma-Aldrich	2021-09-19	https://sds.chemicalsafety.com/sds/pda/msds/getpdf.ashx?action=msdsdocument&auth=200C200C200C200C2008207A200D2078200C200C200C200C200C200C200C200C200C2008&param1=ZmRwLjNfODU5OTE0MDNORQ==&unique=1677530272&session=196cbe312fdaa5177aa60b1a0780f7ae&hostname=78.8.217.118	6	6.25	1.14564	18.3303	8	1	6	1	0	0	4	3.66667	danger	26	20.6667
Hexane	110-54-3	organic	liquid	86.18	Thermo Fisher	2020-02-14	https://sds.chemicalsafety.com/sds/pda/msds/getpdf.ashx?action=msdsdocument&auth=200C200C200C200C2008207A200D2078200C200C200C200C200C200C200C200C200C2008&param1=ZmRwLjFfMjcwNTAzMTNORQ==&unique=1677530255&session=196cbe312fdaa5177aa60b1a0780f7ae&hostname=78.8.217.118	7.5				9	4	4	1	0	0	3		danger	28
Hexane	110-54-3	organic	liquid	86.18	PANREAC QUIMICA	2020-07-06	https://sds.chemicalsafety.com/sds/pda/msds/getpdf.ashx?action=msdsdocument&auth=200C200C200C200C2008207A200D2078200C200C200C200C200C200C200C200C200C2008&param1=ZmRwLjFfMzEwODg1MDNORQ==&unique=1677530250&session=196cbe312fdaa5177aa60b1a0780f7ae&hostname=78.8.217.118	5.25				7	1	5	1	0	0	4		danger	8
Imipramine hydrochloride	113-52-0	organic	solid	316.87	Sigma-Aldrich	2021-10-28	https://sds.chemicalsafety.com/sds/pda/msds/getpdf.ashx?action=msdsdocument&auth=200C200C200C200C2008207A200D2078200C200C200C200C200C200C200C200C200C2008&param1=ZmRwLjFfMDY1NDQxMDNORQ==&unique=1677667135&session=cee9c3e3124a7c78e3d61a62e6a5f1a2&hostname=139.28.41.7	0.75	1.41667	1.60728	113.455	1	0	1	0	0	0	1	1	danger	5	8.66667
Imipramine hydrochloride	113-52-0	organic	solid	316.87	Thermo Fisher	2020-02-14	https://sds.chemicalsafety.com/sds/pda/msds/getpdf.ashx?action=msdsdocument&auth=200C200C200C200C2008207A200D2078200C200C200C200C200C200C200C200C200C2008&param1=ZmRwLjFfMTAxMTAzMTNORQ==&unique=1677667224&session=cee9c3e3124a7c78e3d61a62e6a5f1a2&hostname=139.28.41.7	3.25				5	1	2	1	1	0	1		warning	17
Imipramine hydrochloride	113-52-0	organic	solid	316.87	Combi-Blocks	2023-01-02	https://sds.chemicalsafety.com/sds/pda/msds/getpdf.ashx?action=msdsdocument&auth=200C200C200C200C2008207A200D2078200C200C200C200C200C200C200C200C200C2008&param1=ZmRwLjFfNDE3OTUxMTNORQ==&unique=1677667281&session=cee9c3e3124a7c78e3d61a62e6a5f1a2&hostname=139.28.41.7	0.25				1	0	0	0	1	0	1		warning	4
Luminol	521-31-3	organic	solid	177.16	Sigma-Aldrich	2021-06-07	https://sds.chemicalsafety.com/sds/pda/msds/getpdf.ashx?action=msdsdocument&auth=200C200C200C200C2008207A200D2078200C200C200C200C200C200C200C200C200C2008&param1=ZmRwLjFfMTM5MjYwMDNORQ==&unique=1677668840&session=cee9c3e3124a7c78e3d61a62e6a5f1a2&hostname=139.28.41.7	0	1.75	1.56125	89.2143	0	0	0	0	0	0	0	0.666667	none	0	9.66667
Luminol	521-31-3	organic	solid	177.16	Thermo Fisher	2020-02-14	https://sds.chemicalsafety.com/sds/pda/msds/getpdf.ashx?action=msdsdocument&auth=200C200C200C200C2008207A200D2078200C200C200C200C200C200C200C200C200C2008&param1=ZmRwLjFfMjU2MjkyMTNORQ==&unique=1677668908&session=cee9c3e3124a7c78e3d61a62e6a5f1a2&hostname=139.28.41.7	3				4	1	2	1	0	0	1		warning	14
Luminol	521-31-3	organic	solid	177.16	Combi-Blocks	2023-01-02	https://sds.chemicalsafety.com/sds/pda/msds/getpdf.ashx?action=msdsdocument&auth=200C200C200C200C2008207A200D2078200C200C200C200C200C200C200C200C200C2008&param1=ZmRwLjFfNTI2MzkwMTNORQ==&unique=1677668958&session=cee9c3e3124a7c78e3d61a62e6a5f1a2&hostname=139.28.41.7	2.25				4	0	2	1	1	0	1		warning	15
Methyl salicylate	119-36-8	organic	liquid	152.15	Sigma-Aldrich	2022-01-08	https://sds.chemicalsafety.com/sds/pda/msds/getpdf.ashx?action=msdsdocument&auth=200C200C200C200C2008207A200D2078200C200C200C200C200C200C200C200C200C2008&param1=ZmRwLjJfNDYzNjgxMjNORQ==&unique=1676930758&session=9c1a704466e3bae6447bfa7b329f5889&hostname=78.8.217.118	1.75	2.25	0.661438	29.3972	3	1	0	1	1	0	2	2.66667	danger	8	13
Methyl salicylate	119-36-8	organic	liquid	152.15	Thermo Fisher	2022-10-24	https://sds.chemicalsafety.com/sds/pda/msds/getpdf.ashx?action=msdsdocument&auth=200C200C200C200C2008207A200D2078200C200C200C200C200C200C200C200C200C2008&param1=ZmRwLjFfMjEyNTAzMTNORQ==&unique=1676930781&session=9c1a704466e3bae6447bfa7b329f5889&hostname=78.8.217.118	3				4	2	1	0	1	0	3		danger	18
Methyl salicylate	119-36-8	organic	liquid	152.15	U. S. Pharmacopeia	2020-12-21	https://sds.chemicalsafety.com/sds/pda/msds/getpdf.ashx?action=msdsdocument&auth=200C200C200C200C2008207A200D2078200C200C200C200C200C200C200C200C200C2008&param1=ZmRwLjFfNjA5NjQ1MjNORQ==&unique=1676930787&session=9c1a704466e3bae6447bfa7b329f5889&hostname=78.8.217.118	2				3	1	1	0	1	0	3		danger
Methylene Blue	61-73-4	organic	solid	319.9	Combi-Blocks	2021-01-29	https://sds.chemicalsafety.com/sds/pda/msds/getpdf.ashx?action=msdsdocument&auth=200C200C200C200C2008207A200D2078200C200C200C200C200C200C200C200C200C2008&param1=ZmRwLjFfNjU2MTMwMTNORQ==&unique=1676931731&session=9c1a704466e3bae6447bfa7b329f5889&hostname=78.8.217.118	0	0.166667	0.144338	86.6025	0	0	0	0	0	0	0	0.666667	none	0	3
Methylene Blue	61-73-4	organic	solid	319.9	Sigma-Aldrich	2021-03-14	https://sds.chemicalsafety.com/sds/pda/msds/getpdf.ashx?action=msdsdocument&auth=200C200C200C200C2008207A200D2078200C200C200C200C200C200C200C200C200C2008&param1=ZmRwLjFfNTA2MzMzMjNORQ==&unique=1676931732&session=9c1a704466e3bae6447bfa7b329f5889&hostname=78.8.217.118	0.25				1	0	0	0	1	0	1		warning	4
Methylene Blue	61-73-4	organic	solid	319.9	PANREAC QUIMICA S.L.U.	2020-02-14	https://sds.chemicalsafety.com/sds/pda/msds/getpdf.ashx?action=msdsdocument&auth=200C200C200C200C2008207A200D2078200C200C200C200C200C200C200C200C200C2008&param1=ZmRwLjFfMTUyNzg1MDNORQ==&unique=1676931759&session=9c1a704466e3bae6447bfa7b329f5889&hostname=78.8.217.118	0.25				1	0	0	0	1	0	1		warning	5
N,N-Dimethylformamide	68-12-2	organic	liquid	73.09	Sigma-Aldrich	2021-08-25	https://sds.chemicalsafety.com/sds/pda/msds/getpdf.ashx?action=msdsdocument&auth=200C200C200C200C2008207A200D2078200C200C200C200C200C200C200C200C200C2008&param1=ZmRwLjFfMjgxNjIyMjNORQ==&unique=1677007250&session=7e72ee6b9a74e6f21cae92cd484df72a&hostname=78.8.217.118	3.75	3.91667	1.25831	32.127	6	2	1	1	2	0	3	3	danger	22	17.6667
N,N-Dimethylformamide	68-12-2	organic	liquid	73.09	PANREAC QUIMICA	2020-11-09	https://sds.chemicalsafety.com/sds/pda/msds/getpdf.ashx?action=msdsdocument&auth=200C200C200C200C2008207A200D2078200C200C200C200C200C200C200C200C200C2008&param1=ZmRwLjFfNjExNzg1MDNORQ==&unique=1677007257&session=7e72ee6b9a74e6f21cae92cd484df72a&hostname=78.8.217.118	2.75				5	1	1	1	2	0	3		danger	6
N,N-Dimethylformamide	68-12-2	organic	liquid	73.09	Thermo Fisher	2020-02-14	https://sds.chemicalsafety.com/sds/pda/msds/getpdf.ashx?action=msdsdocument&auth=200C200C200C200C2008207A200D2078200C200C200C200C200C200C200C200C200C2008&param1=ZmRwLjFfMTMxMzAzMTNORQ==&unique=1677007270&session=7e72ee6b9a74e6f21cae92cd484df72a&hostname=78.8.217.118	5.25				8	3	1	2	2	0	3		danger	25
N,O-Bis(trimethylsilyl)acetamide	10416-59-8	organic	liquid	203.4	Combi-Blocks	2022-09-10	https://sds.chemicalsafety.com/sds/pda/msds/getpdf.ashx?action=msdsdocument&auth=200C200C200C200C2008207A200D2078200C200C200C200C200C200C200C200C200C2008&param1=ZmRwLjFfNDY3MjkwMTNORQ==&unique=1677007649&session=7e72ee6b9a74e6f21cae92cd484df72a&hostname=78.8.217.118	1.75	2.91667	1.25831	43.1419	3	1	0	1	1	0	3	3	danger	18	20
N,O-Bis(trimethylsilyl)acetamide	10416-59-8	organic	liquid	203.4	Sigma-Aldrich	2021-06-01	https://sds.chemicalsafety.com/sds/pda/msds/getpdf.ashx?action=msdsdocument&auth=200C200C200C200C2008207A200D2078200C200C200C200C200C200C200C200C200C2008&param1=ZmRwLjFfMjE0ODc2MDNORQ==&unique=1677007653&session=7e72ee6b9a74e6f21cae92cd484df72a&hostname=78.8.217.118	2.75				4	2	0	1	1	0	3		danger	19
N,O-Bis(trimethylsilyl)acetamide	10416-59-8	organic	liquid	203.4	Thermo Fisher	2020-02-14	https://sds.chemicalsafety.com/sds/pda/msds/getpdf.ashx?action=msdsdocument&auth=200C200C200C200C2008207A200D2078200C200C200C200C200C200C200C200C200C2008&param1=ZmRwLjFfMjgzNzAzMTNORQ==&unique=1677007670&session=7e72ee6b9a74e6f21cae92cd484df72a&hostname=78.8.217.118	4.25				6	3	0	2	1	0	3		danger	23
Naphthalene	91-20-3	organic	solid	128.17	Sigma-Aldrich	2022-09-06	https://sds.chemicalsafety.com/sds/pda/msds/getpdf.ashx?action=msdsdocument&auth=200C200C200C200C2008207A200D2078200C200C200C200C200C200C200C200C200C2008&param1=ZmRwLjFfNzg2MjM2MDNORQ==&unique=1677008174&session=7e72ee6b9a74e6f21cae92cd484df72a&hostname=78.8.217.118	3.75	3	0.901388	30.0463	5	2	2	0	1	0	4	3.33333	warning	15	16.5
Naphthalene	91-20-3	organic	solid	128.17	Thermo Fisher	2020-02-14	https://sds.chemicalsafety.com/sds/pda/msds/getpdf.ashx?action=msdsdocument&auth=200C200C200C200C2008207A200D2078200C200C200C200C200C200C200C200C200C2008&param1=ZmRwLjFfMzQzMjAzMTNORQ==&unique=1677008184&session=7e72ee6b9a74e6f21cae92cd484df72a&hostname=78.8.217.118	2				3	1	1	0	1	0	3		danger	18
Naphthalene	91-20-3	organic	solid	128.17	U. S. Pharmacopeia	2021-07-26	https://sds.chemicalsafety.com/sds/pda/msds/getpdf.ashx?action=msdsdocument&auth=200C200C200C200C2008207A200D2078200C200C200C200C200C200C200C200C200C2008&param1=ZmRwLjFfOTM0NzQ1MjNORQ==&unique=1677008191&session=7e72ee6b9a74e6f21cae92cd484df72a&hostname=78.8.217.118	3.25				5	0	4	0	1	0	3		warning
n-Octane	111-65-9	organic	liquid	114.2	Combi-Blocks	2020-01-29	https://sds.chemicalsafety.com/sds/pda/msds/getpdf.ashx?action=msdsdocument&auth=200C200C200C200C2008207A200D2078200C200C200C200C200C200C200C200C200C2008&param1=ZmRwLjFfMzE3MDYxMTNORQ==&unique=1677009846&session=7e72ee6b9a74e6f21cae92cd484df72a&hostname=78.8.217.118	4	4.83333	0.877971	18.1649	5	2	2	1	0	0	4	3.66667	danger	21	22.5
n-Octane	111-65-9	organic	liquid	114.2	Thermo Fisher	2020-02-14	https://sds.chemicalsafety.com/sds/pda/msds/getpdf.ashx?action=msdsdocument&auth=200C200C200C200C2008207A200D2078200C200C200C200C200C200C200C200C200C2008&param1=ZmRwLjFfMDI0NzAzMTNORQ==&unique=1677009851&session=7e72ee6b9a74e6f21cae92cd484df72a&hostname=78.8.217.118	4.75				6	2	3	1	0	0	3		danger	24
n-Octane	111-65-9	organic	liquid	114.2	TCI America	2022-12-01	https://sds.chemicalsafety.com/sds/pda/msds/getpdf.ashx?action=msdsdocument&auth=200C200C200C200C2008207A200D2078200C200C200C200C200C200C200C200C200C2008&param1=ZmRwLjFfMTg2NTA1MjNORQ==&unique=1677009855&session=7e72ee6b9a74e6f21cae92cd484df72a&hostname=78.8.217.118	5.75				7	3	3	1	0	0	4		danger
Oxcarbazepine	28721-07-5	organic	solid	252.27	Sigma-Aldrich	2022-03-31	https://sds.chemicalsafety.com/sds/pda/msds/getpdf.ashx?action=msdsdocument&auth=200C200C200C200C2008207A200D2078200C200C200C200C200C200C200C200C200C2008&param1=ZmRwLjFfMDg0OTMzMjNORQ==&unique=1677014008&session=7e72ee6b9a74e6f21cae92cd484df72a&hostname=78.8.217.118	0.25	0.75	1.08972	145.297	1	0	0	0	1	0	1	1	warning	4	2
Oxcarbazepine	28721-07-5	organic	solid	252.27	Thermo Fisher	2020-02-18	https://sds.chemicalsafety.com/sds/pda/msds/getpdf.ashx?action=msdsdocument&auth=200C200C200C200C2008207A200D2078200C200C200C200C200C200C200C200C200C2008&param1=ZmRwLjFfMzcxNTAzMTNORQ==&unique=1677014010&session=7e72ee6b9a74e6f21cae92cd484df72a&hostname=78.8.217.118	0				0	0	0	0	0	0	0		none	0
Oxcarbazepine	28721-07-5	organic	solid	252.27	U. S. Pharmacopeia	2020-01-08	https://sds.chemicalsafety.com/sds/pda/msds/getpdf.ashx?action=msdsdocument&auth=200C200C200C200C2008207A200D2078200C200C200C200C200C200C200C200C200C2008&param1=ZmRwLjFfMTIyNzQ1MjNORQ==&unique=1677014012&session=7e72ee6b9a74e6f21cae92cd484df72a&hostname=78.8.217.118	2				3	1	1	0	1	0	2		danger
Pyrazine	290-37-9	organic	solid	80.09	Sigma-Aldrich	2021-04-26	https://sds.chemicalsafety.com/sds/pda/msds/getpdf.ashx?action=msdsdocument&auth=200C200C200C200C2008207A200D2078200C200C200C200C200C200C200C200C200C2008&param1=ZmRwLjFfODg3NzYwMDNORQ==&unique=1677019969&session=7e72ee6b9a74e6f21cae92cd484df72a&hostname=78.8.217.118	1	2.58333	1.42156	55.0281	1	1	0	0	0	0	1	1.66667	danger	5	13.3333
Pyrazine	290-37-9	organic	solid	80.09	Combi-Blocks	2020-01-24	https://sds.chemicalsafety.com/sds/pda/msds/getpdf.ashx?action=msdsdocument&auth=200C200C200C200C2008207A200D2078200C200C200C200C200C200C200C200C200C2008&param1=ZmRwLjFfMjk5MTYxMTNORQ==&unique=1677019978&session=7e72ee6b9a74e6f21cae92cd484df72a&hostname=78.8.217.118	3				4	1	2	1	0	0	2		danger	17
Pyrazine	290-37-9	organic	solid	80.09	Thermo Fisher	2020-02-14	https://sds.chemicalsafety.com/sds/pda/msds/getpdf.ashx?action=msdsdocument&auth=200C200C200C200C2008207A200D2078200C200C200C200C200C200C200C200C200C2008&param1=ZmRwLjFfMDkwOTAzMTNORQ==&unique=1677019984&session=7e72ee6b9a74e6f21cae92cd484df72a&hostname=78.8.217.118	3.75				5	1	3	1	0	0	2		warning	18
Pyridine	110-86-1	organic	liquid	79.10	Sigma-Aldrich	2022-07-23	https://sds.chemicalsafety.com/sds/pda/msds/getpdf.ashx?action=msdsdocument&auth=200C200C200C200C2008207A200D2078200C200C200C200C200C200C200C200C200C2008&param1=ZmRwLjVfNjcwOTc2MDNORQ==&unique=1677020442&session=7e72ee6b9a74e6f21cae92cd484df72a&hostname=78.8.217.118	3.5	3.16667	0.288675	9.11606	7	0	3	1	3	0	2	2	danger	22	22.6667
Pyridine	110-86-1	organic	liquid	79.10	Thermo Fisher	2020-02-14	https://sds.chemicalsafety.com/sds/pda/msds/getpdf.ashx?action=msdsdocument&auth=200C200C200C200C2008207A200D2078200C200C200C200C200C200C200C200C200C2008&param1=ZmRwLjFfOTA0ODAzMTNORQ==&unique=1677020434&session=7e72ee6b9a74e6f21cae92cd484df72a&hostname=78.8.217.118	3				6	0	3	0	3	0	2		danger	24
Pyridine	110-86-1	organic	liquid	79.10	Combi-Blocks	2022-08-26	https://sds.chemicalsafety.com/sds/pda/msds/getpdf.ashx?action=msdsdocument&auth=200C200C200C200C2008207A200D2078200C200C200C200C200C200C200C200C200C2008&param1=ZmRwLjFfMTc4NTUxMTNORQ==&unique=1677020429&session=7e72ee6b9a74e6f21cae92cd484df72a&hostname=78.8.217.118	3				6	0	3	0	3	0	2		danger	22
Sodium acetate trihydrate	6131-90-4	organic	solid	136.08	Sigma-Aldrich	2020-11-11	https://sds.chemicalsafety.com/sds/pda/msds/getpdf.ashx?action=msdsdocument&auth=200C200C200C200C2008207A200D2078200C200C200C200C200C200C200C200C200C2008&param1=ZmRwLjFfMzIxNTgxMjNORQ==&unique=1677158840&session=6365fb7a9edc69f8e4517c7c8da680ed&hostname=78.8.217.118	0	0	0	0	0	0	0	0	0	0	0	0	none	0	0.333333
Sodium acetate trihydrate	6131-90-4	organic	solid	136.08	Thermo Fisher	2020-02-14	https://sds.chemicalsafety.com/sds/pda/msds/getpdf.ashx?action=msdsdocument&auth=200C200C200C200C2008207A200D2078200C200C200C200C200C200C200C200C200C2008&param1=ZmRwLjFfOTM3NzAzMTNORQ==&unique=1677158845&session=6365fb7a9edc69f8e4517c7c8da680ed&hostname=78.8.217.118	0				0	0	0	0	0	0	0		warning	1
Sodium acetate trihydrate	6131-90-4	organic	solid	136.08	U. S. Pharmacopeia	2020-02-20	https://sds.chemicalsafety.com/sds/pda/msds/getpdf.ashx?action=msdsdocument&auth=200C200C200C200C2008207A200D2078200C200C200C200C200C200C200C200C200C2008&param1=ZmRwLjFfNzUwODQ1MjNORQ==&unique=1677158847&session=6365fb7a9edc69f8e4517c7c8da680ed&hostname=78.8.217.118	0				0	0	0	0	0	0	0		none	0
Triethylamine	121-44-8	organic	liquid	101.19	Sigma-Aldrich	2022-09-27	https://sds.chemicalsafety.com/sds/pda/msds/getpdf.ashx?action=msdsdocument&auth=200C200C200C200C2008207A200D2078200C200C200C200C200C200C200C200C200C2008&param1=ZmRwLjFfNDIzMDg2MDNORQ==&unique=1677440816&session=bdf11b8600b42b0c2a10febd77821c6b&hostname=78.8.217.118	5.25	5.08333	0.520416	10.2377	8	2	2	3	1	0	4	3.66667	danger	23	18
Triethylamine	121-44-8	organic	liquid	101.19	Thermo Fisher	2020-02-14	https://sds.chemicalsafety.com/sds/pda/msds/getpdf.ashx?action=msdsdocument&auth=200C200C200C200C2008207A200D2078200C200C200C200C200C200C200C200C200C2008&param1=ZmRwLjFfODg3NzAzMTNORQ==&unique=1677440819&session=bdf11b8600b42b0c2a10febd77821c6b&hostname=78.8.217.118	5.5				8	3	1	3	1	0	4		danger	23
Triethylamine	121-44-8	organic	liquid	101.19	AppliChem GmbH	2021-01-20	https://sds.chemicalsafety.com/sds/pda/msds/getpdf.ashx?action=msdsdocument&auth=200C200C200C200C2008207A200D2078200C200C200C200C200C200C200C200C200C2008&param1=ZmRwLjFfMzI0Njg1MDNORQ==&unique=1677440804&session=bdf11b8600b42b0c2a10febd77821c6b&hostname=78.8.217.118	4.5				7	2	1	3	1	0	3		danger	8
Vanillin	121-33-5	organic	solid	152.15	Sigma-Aldrich	2021-10-02	https://sds.chemicalsafety.com/sds/pda/msds/getpdf.ashx?action=msdsdocument&auth=200C200C200C200C2008207A200D2078200C200C200C200C200C200C200C200C200C2008&param1=ZmRwLjRfMTA4MDcwMDNORQ==&unique=1677442458&session=bdf11b8600b42b0c2a10febd77821c6b&hostname=78.8.217.118	1.25	1.33333	0.381881	28.6411	2	0	1	1	0	0	1	1	warning	6	5.5
Vanillin	121-33-5	organic	solid	152.15	Thermo Fisher	2020-02-14	https://sds.chemicalsafety.com/sds/pda/msds/getpdf.ashx?action=msdsdocument&auth=200C200C200C200C2008207A200D2078200C200C200C200C200C200C200C200C200C2008&param1=ZmRwLjFfMDAyODAzMTNORQ==&unique=1677442469&session=bdf11b8600b42b0c2a10febd77821c6b&hostname=78.8.217.118	1.75				2	1	1	0	0	0	1		warning	5
Vanillin	121-33-5	organic	solid	152.15	Avantor Performance Materials	2020-03-26	https://sds.chemicalsafety.com/sds/pda/msds/getpdf.ashx?action=msdsdocument&auth=200C200C200C200C2008207A200D2078200C200C200C200C200C200C200C200C200C2008&param1=ZmRwLjFfOTg0MjkxMDNORQ==&unique=1677442452&session=bdf11b8600b42b0c2a10febd77821c6b&hostname=78.8.217.118	1				2	0	1	0	1	0	1		warning
(2-Hydroxypropyl)-beta-cyclodextrin	128446-35-5	organic	solid	1460	Sigma-Aldrich	2022-02-26	https://sds.chemicalsafety.com/sds/pda/msds/getpdf.ashx?action=msdsdocument&auth=200C200C200C200C2008207A200D2078200C200C200C200C200C200C200C200C200C2008&param1=ZmRwLjFfODIwNDgxMjNORQ==&unique=1677528661&session=196cbe312fdaa5177aa60b1a0780f7ae&hostname=78.8.217.118	0	0	0	0	0	0	0	0	0	0	0	0	none	0	0
(2-Hydroxypropyl)-beta-cyclodextrin	128446-35-5	organic	solid	1460	Thermo Fisher	2020-02-14	https://sds.chemicalsafety.com/sds/pda/msds/getpdf.ashx?action=msdsdocument&auth=200C200C200C200C2008207A200D2078200C200C200C200C200C200C200C200C200C2008&param1=ZmRwLjFfMDg4NTEzMTNORQ==&unique=1677528660&session=196cbe312fdaa5177aa60b1a0780f7ae&hostname=78.8.217.118	0				0	0	0	0	0	0	0		none	0
(2-Hydroxypropyl)-beta-cyclodextrin	128446-35-5	organic	solid	1460	AppliChem	2021-03-11	https://sds.chemicalsafety.com/sds/pda/msds/getpdf.ashx?action=msdsdocument&auth=200C200C200C200C2008207A200D2078200C200C200C200C200C200C200C200C200C2008&param1=ZmRwLjFfMDcxNjg1MDNORQ==&unique=1677528663&session=196cbe312fdaa5177aa60b1a0780f7ae&hostname=78.8.217.118	0				0	0	0	0	0	0	0		none	0
Bis Tris	6976-37-0	organic	solid	209.24	Sigma-Aldrich	2022-11-15	https://sds.chemicalsafety.com/sds/pda/msds/getpdf.ashx?action=msdsdocument&auth=200C200C200C200C2008207A200D2078200C200C200C200C200C200C200C200C200C2008&param1=ZmRwLjFfOTQ4ODMxMDNORQ==&unique=1677530650&session=196cbe312fdaa5177aa60b1a0780f7ae&hostname=78.8.217.118	1	1	1	100	1	1	0	0	0	0	1	0.666667	danger	3	5.33333
Bis Tris	6976-37-0	organic	solid	209.24	Combi-Blocks	2021-06-16	https://sds.chemicalsafety.com/sds/pda/msds/getpdf.ashx?action=msdsdocument&auth=200C200C200C200C2008207A200D2078200C200C200C200C200C200C200C200C200C2008&param1=ZmRwLjFfMjc1NzIxMTNORQ==&unique=1677530663&session=196cbe312fdaa5177aa60b1a0780f7ae&hostname=78.8.217.118	2				3	0	2	1	0	0	1		warning	13
Bis Tris	6976-37-0	organic	solid	209.24	AppliChem	2021-02-23	https://sds.chemicalsafety.com/sds/pda/msds/getpdf.ashx?action=msdsdocument&auth=200C200C200C200C2008207A200D2078200C200C200C200C200C200C200C200C200C2008&param1=ZmRwLjFfNjc4Njg1MDNORQ==&unique=1677530661&session=196cbe312fdaa5177aa60b1a0780f7ae&hostname=78.8.217.118	0				0	0	0	0	0	0	0		none	0
Potassium chloride	7447-40-7	inorganic	solid	74.55	Sigma-Aldrich	2022-04-04	https://sds.chemicalsafety.com/sds/pda/msds/getpdf.ashx?action=msdsdocument&auth=200C200C200C200C2008207A200D2078200C200C200C200C200C200C200C200C200C2008&param1=ZmRwLjFfMDY0OTI2MDNORQ==&unique=1677534127&session=196cbe312fdaa5177aa60b1a0780f7ae&hostname=78.8.217.118	0	1	1.14564	114.564	0	0	0	0	0	0	0	0.333333	none	0	7.5
Potassium chloride	7447-40-7	inorganic	solid	74.55	Combi-Blocks	2020-01-29	https://sds.chemicalsafety.com/sds/pda/msds/getpdf.ashx?action=msdsdocument&auth=200C200C200C200C2008207A200D2078200C200C200C200C200C200C200C200C200C2008&param1=ZmRwLjFfNzIxNTUxMTNORQ==&unique=1677534134&session=196cbe312fdaa5177aa60b1a0780f7ae&hostname=78.8.217.118	2.25				4	0	2	1	1	0	1		warning	15
Potassium chloride	7447-40-7	inorganic	solid	74.55	U. S. Pharmacopeia	2021-05-06	https://sds.chemicalsafety.com/sds/pda/msds/getpdf.ashx?action=msdsdocument&auth=200C200C200C200C2008207A200D2078200C200C200C200C200C200C200C200C200C2008&param1=ZmRwLjFfMTM1NzQ1MjNORQ==&unique=1677534141&session=196cbe312fdaa5177aa60b1a0780f7ae&hostname=78.8.217.118	0.75				1	0	1	0	0	0	0		warning
Cyclohexane	110-82-7	organic	liquid	84.16	Sigma-Aldrich	2022-10-19	https://sds.chemicalsafety.com/sds/pda/msds/getpdf.ashx?action=msdsdocument&auth=200C200C200C200C2008207A200D2078200C200C200C200C200C200C200C200C200C2008&param1=ZmRwLjFfOTIzMjE0MDNORQ==&unique=1677534867&session=196cbe312fdaa5177aa60b1a0780f7ae&hostname=78.8.217.118	5	4.91667	0.144338	2.93568	6	3	2	1	0	0	4	3.66667	danger	23	18.6667
Cyclohexane	110-82-7	organic	liquid	84.16	Thermo Fisher	2020-02-14	https://sds.chemicalsafety.com/sds/pda/msds/getpdf.ashx?action=msdsdocument&auth=200C200C200C200C2008207A200D2078200C200C200C200C200C200C200C200C200C2008&param1=ZmRwLjFfMjM3OTAzMTNORQ==&unique=1677534868&session=196cbe312fdaa5177aa60b1a0780f7ae&hostname=78.8.217.118	4.75				6	2	3	1	0	0	3		danger	25
Cyclohexane	110-82-7	organic	liquid	84.16	PANREAC QUIMICA	2020-05-05	https://sds.chemicalsafety.com/sds/pda/msds/getpdf.ashx?action=msdsdocument&auth=200C200C200C200C2008207A200D2078200C200C200C200C200C200C200C200C200C2008&param1=ZmRwLjFfMDU5Nzg1MDNORQ==&unique=1677534866&session=196cbe312fdaa5177aa60b1a0780f7ae&hostname=78.8.217.118	5				6	3	2	1	0	0	4		danger	8
N,O-Bis(trimethylsilyl)acetamide for gas chromatography	10416-59-8	organic	liquid	203.43	Sigma-Aldrich	2021-09-14	https://sds.chemicalsafety.com/sds/pda/msds/getpdf.ashx?action=msdsdocument&auth=200C200C200C200C2008207A200D2078200C200C200C200C200C200C200C200C200C2008&param1=ZmRwLjFfNDU4NjkxMjNORQ==&unique=1677595986&session=2c544a1300c519092899afa4112f269c&hostname=78.8.217.118	2.75	2.91667	1.25831	43.1419	4	2	0	1	1	0	3	3	danger	19	20.3333
N,O-Bis(trimethylsilyl)acetamide for gas chromatography	10416-59-8	organic	liquid	203.43	Thermo Fisher	2020-02-14	https://sds.chemicalsafety.com/sds/pda/msds/getpdf.ashx?action=msdsdocument&auth=200C200C200C200C2008207A200D2078200C200C200C200C200C200C200C200C200C2008&param1=ZmRwLjFfMjgzNzAzMTNORQ==&unique=1677595981&session=2c544a1300c519092899afa4112f269c&hostname=78.8.217.118	4.25				6	3	0	2	1	0	3		danger	23
N,O-Bis(trimethylsilyl)acetamide for gas chromatography	10416-59-8	organic	liquid	203.43	Combi-Blocks	2023-01-02	https://sds.chemicalsafety.com/sds/pda/msds/getpdf.ashx?action=msdsdocument&auth=200C200C200C200C2008207A200D2078200C200C200C200C200C200C200C200C200C2008&param1=ZmRwLjFfNDY3MjkwMTNORQ==&unique=1677595951&session=2c544a1300c519092899afa4112f269c&hostname=78.8.217.118	1.75				3	1	0	1	1	0	3		danger	19
Potassium iodide	7681-11-0	inorganic	solid	166.00	Sigma-Aldrich	2021-07-28	https://sds.chemicalsafety.com/sds/pda/msds/getpdf.ashx?action=msdsdocument&auth=200C200C200C200C2008207A200D2078200C200C200C200C200C200C200C200C200C2008&param1=ZmRwLjFfMTEzMDM2MDNORQ==&unique=1677953669&session=0e1da735f43fe643971f4dc37256385c&hostname=78.8.217.118	1	1.25	0.433013	34.641	1	1	0	0	0	0	1	1	danger	5	7.5
Potassium iodide	7681-11-0	inorganic	solid	166.00	Combi-Blocks	2023-01-02	https://sds.chemicalsafety.com/sds/pda/msds/getpdf.ashx?action=msdsdocument&auth=200C200C200C200C2008207A200D2078200C200C200C200C200C200C200C200C200C2008&param1=ZmRwLjFfMzg4NjUxMTNORQ==&unique=1677953664&session=0e1da735f43fe643971f4dc37256385c&hostname=78.8.217.118	1.75				3	0	2	0	1	0	1		warning	10
Potassium iodide	7681-11-0	inorganic	solid	166.00	U. S. Pharmacopeia	2022-12-06	https://sds.chemicalsafety.com/sds/pda/msds/getpdf.ashx?action=msdsdocument&auth=200C200C200C200C2008207A200D2078200C200C200C200C200C200C200C200C200C2008&param1=ZmRwLjFfMTA3NzQ1MjNORQ==&unique=1677953674&session=0e1da735f43fe643971f4dc37256385c&hostname=78.8.217.118	1				1	1	0	0	0	0	1		danger
Ammonium iron(III) sulfate dodecahydrate	7783-83-7	inorganic	solid	482.19	Sigma-Aldrich	2021-10-01	https://sds.chemicalsafety.com/sds/pda/msds/getpdf.ashx?action=msdsdocument&auth=200C200C200C200C2008207A200D2078200C200C200C200C200C200C200C200C200C2008&param1=ZmRwLjFfNjUxNzg2MDNORQ==&unique=1677954239&session=0e1da735f43fe643971f4dc37256385c&hostname=78.8.217.118	1	1.33333	0.288675	21.6506	1	1	0	0	0	0	1	1	danger	3	5.66667
Ammonium iron(III) sulfate dodecahydrate	7783-83-7	inorganic	solid	482.19	Combi-Blocks	2023-01-02	https://sds.chemicalsafety.com/sds/pda/msds/getpdf.ashx?action=msdsdocument&auth=200C200C200C200C2008207A200D2078200C200C200C200C200C200C200C200C200C2008&param1=ZmRwLjFfNjgyNzUxMTNORQ==&unique=1677954241&session=0e1da735f43fe643971f4dc37256385c&hostname=78.8.217.118	1.5				2	0	2	0	0	0	1		warning	7
Ammonium iron(III) sulfate dodecahydrate	7783-83-7	inorganic	solid	482.19	Thermo Fisher	2021-12-20	https://sds.chemicalsafety.com/sds/pda/msds/getpdf.ashx?action=msdsdocument&auth=200C200C200C200C2008207A200D2078200C200C200C200C200C200C200C200C200C2008&param1=ZmRwLjFfMzkyMDAzMTNORQ==&unique=1677954250&session=0e1da735f43fe643971f4dc37256385c&hostname=78.8.217.118	1.5				2	0	2	0	0	0	1		warning	7
1,10-Phenanthroline monohydrate	5144-89-8	organic	solid	198.2	Sigma-Aldrich	2022-11-15	https://sds.chemicalsafety.com/sds/pda/msds/getpdf.ashx?action=msdsdocument&auth=200C200C200C200C2008207A200D2078200C200C200C200C200C200C200C200C200C2008&param1=ZmRwLjFfODExNDM0MDNORQ==&unique=1677954743&session=0e1da735f43fe643971f4dc37256385c&hostname=78.8.217.118	2.5	1.5	1	66.6667	3	2	0	1	0	0	2	1.66667	danger	7	6.66667
1,10-Phenanthroline monohydrate	5144-89-8	organic	solid	198.2	Thermo Fisher	2020-02-14	https://sds.chemicalsafety.com/sds/pda/msds/getpdf.ashx?action=msdsdocument&auth=200C200C200C200C2008207A200D2078200C200C200C200C200C200C200C200C200C2008&param1=ZmRwLjFfMDY3OTAzMTNORQ==&unique=1677954743&session=0e1da735f43fe643971f4dc37256385c&hostname=78.8.217.118	0.5				1	0	0	1	0	0	1		danger	6
1,10-Phenanthroline monohydrate	5144-89-8	organic	solid	198.2	Combi-Blocks	2023-01-02	https://sds.chemicalsafety.com/sds/pda/msds/getpdf.ashx?action=msdsdocument&auth=200C200C200C200C2008207A200D2078200C200C200C200C200C200C200C200C200C2008&param1=ZmRwLjFfNDY0MzkwMTNORQ==&unique=1677954746&session=0e1da735f43fe643971f4dc37256385c&hostname=78.8.217.118	1.5				2	1	0	1	0	0	2		danger	7
Sodium sulfite	7757-83-7	inorganic	solid	126.04	Sigma-Aldrich	2021-10-08	https://sds.chemicalsafety.com/sds/pda/msds/getpdf.ashx?action=msdsdocument&auth=200C200C200C200C2008207A200D2078200C200C200C200C200C200C200C200C200C2008&param1=ZmRwLjRfMTM1NTgxMjNORQ==&unique=1677955547&session=0e1da735f43fe643971f4dc37256385c&hostname=78.8.217.118	0	0.75	1.29904	173.205	0	0	0	0	0	0	0	0.333333	none	0	5
Sodium sulfite	7757-83-7	inorganic	solid	126.04	Thermo Fisher	2020-02-14	https://sds.chemicalsafety.com/sds/pda/msds/getpdf.ashx?action=msdsdocument&auth=200C200C200C200C2008207A200D2078200C200C200C200C200C200C200C200C200C2008&param1=ZmRwLjFfODc5ODAzMTNORQ==&unique=1677955549&session=0e1da735f43fe643971f4dc37256385c&hostname=78.8.217.118	0				0	0	0	0	0	0	0		none	0
Sodium sulfite	7757-83-7	inorganic	solid	126.04	Combi-Blocks	2023-01-02	https://sds.chemicalsafety.com/sds/pda/msds/getpdf.ashx?action=msdsdocument&auth=200C200C200C200C2008207A200D2078200C200C200C200C200C200C200C200C200C2008&param1=ZmRwLjFfMTc4NjUxMTNORQ==&unique=1677955543&session=0e1da735f43fe643971f4dc37256385c&hostname=78.8.217.118	2.25				4	0	2	1	1	0	1		warning	15
Bromocresol Green	76-60-8	organic	solid	698.01	Sigma-Aldrich	2020-09-02	https://sds.chemicalsafety.com/sds/pda/msds/getpdf.ashx?action=msdsdocument&auth=200C200C200C200C2008207A200D2078200C200C200C200C200C200C200C200C200C2008&param1=ZmRwLjFfNTU3MzgxMjNORQ==&unique=1677959368&session=0e1da735f43fe643971f4dc37256385c&hostname=78.8.217.118	0	0	0	0	0	0	0	0	0	0	0	0	none	0	0
Bromocresol Green	76-60-8	organic	solid	698.01	Thermo Fisher	2020-02-14	https://sds.chemicalsafety.com/sds/pda/msds/getpdf.ashx?action=msdsdocument&auth=200C200C200C200C2008207A200D2078200C200C200C200C200C200C200C200C200C2008&param1=ZmRwLjJfMDkzMDAzMTNORQ==&unique=1677959369&session=0e1da735f43fe643971f4dc37256385c&hostname=78.8.217.118	0				0	0	0	0	0	0	0		none	0
Bromocresol Green	76-60-8	organic	solid	698.01	PANREAC QUIMICA	2020-10-28	https://sds.chemicalsafety.com/sds/pda/msds/getpdf.ashx?action=msdsdocument&auth=200C200C200C200C2008207A200D2078200C200C200C200C200C200C200C200C200C2008&param1=ZmRwLjFfMzM4NTg1MDNORQ==&unique=1677959363&session=0e1da735f43fe643971f4dc37256385c&hostname=78.8.217.118	0				0	0	0	0	0	0	0		none	0
Lanthanum(III) chloride heptahydrate	10025-84-0	inorganic	solid	371.37	Sigma-Aldrich	2021-07-05	https://sds.chemicalsafety.com/sds/pda/msds/getpdf.ashx?action=msdsdocument&auth=200C200C200C200C2008207A200D2078200C200C200C200C200C200C200C200C200C2008&param1=ZmRwLjFfMzYwNTc2MDNORQ==&unique=1677960257&session=0e1da735f43fe643971f4dc37256385c&hostname=78.8.217.118	3.75	2.91667	0.877971	30.1019	4	3	1	0	0	0	3	2	danger	13	12.6667
Lanthanum(III) chloride heptahydrate	10025-84-0	inorganic	solid	371.37	Thermo Fisher	2020-02-14	https://sds.chemicalsafety.com/sds/pda/msds/getpdf.ashx?action=msdsdocument&auth=200C200C200C200C2008207A200D2078200C200C200C200C200C200C200C200C200C2008&param1=ZmRwLjFfMDc3NTAzMTNORQ==&unique=1677960256&session=0e1da735f43fe643971f4dc37256385c&hostname=78.8.217.118	3				3	3	0	0	0	0	2		danger	12
Lanthanum(III) chloride heptahydrate	10025-84-0	inorganic	solid	371.37	Combi-Blocks	2023-01-02	https://sds.chemicalsafety.com/sds/pda/msds/getpdf.ashx?action=msdsdocument&auth=200C200C200C200C2008207A200D2078200C200C200C200C200C200C200C200C200C2008&param1=ZmRwLjFfNzAwNTYxMTNORQ==&unique=1677960254&session=0e1da735f43fe643971f4dc37256385c&hostname=78.8.217.118	2				3	0	2	1	0	0	1		warning	13
Potassium carbonate	584-08-7	inorganic	solid	138.21	Sigma-Aldrich	2021-05-10	https://sds.chemicalsafety.com/sds/pda/msds/getpdf.ashx?action=msdsdocument&auth=200C200C200C200C2008207A200D2078200C200C200C200C200C200C200C200C200C2008&param1=ZmRwLjNfMTA1OTI2MDNORQ==&unique=1677961240&session=0e1da735f43fe643971f4dc37256385c&hostname=78.8.217.118	2	2.08333	0.144338	6.9282	3	0	2	1	0	0	1	1	warning	13	11.3333
Potassium carbonate	584-08-7	inorganic	solid	138.21	Combi-Blocks	2023-01-02	https://sds.chemicalsafety.com/sds/pda/msds/getpdf.ashx?action=msdsdocument&auth=200C200C200C200C2008207A200D2078200C200C200C200C200C200C200C200C200C2008&param1=ZmRwLjFfODc4NTUxMTNORQ==&unique=1677961236&session=0e1da735f43fe643971f4dc37256385c&hostname=78.8.217.118	2.25				4	0	2	1	1	0	1		warning	15
Potassium carbonate	584-08-7	inorganic	solid	138.21	PANREAC QUIMICA	2020-07-23	https://sds.chemicalsafety.com/sds/pda/msds/getpdf.ashx?action=msdsdocument&auth=200C200C200C200C2008207A200D2078200C200C200C200C200C200C200C200C200C2008&param1=ZmRwLjFfNDAzNzg1MDNORQ==&unique=1677961236&session=0e1da735f43fe643971f4dc37256385c&hostname=78.8.217.118	2				3	0	2	1	0	0	1		warning	6
Sodium salicylate	54-21-7	organic	solid	160.10	Sigma-Aldrich	2021-11-24	https://sds.chemicalsafety.com/sds/pda/msds/getpdf.ashx?action=msdsdocument&auth=200C200C200C200C2008207A200D2078200C200C200C200C200C200C200C200C200C2008&param1=ZmRwLjFfNTUxMjAxMDNORQ==&unique=1678021767&session=60679ec97dfd8e96885c0cbe0e61b143&hostname=139.28.41.7	2.25	1.41667	0.721688	50.9427	4	0	2	1	1	0	2	1.33333	warning	12	9
Sodium salicylate	54-21-7	organic	solid	160.10	Thermo Fisher	2020-02-14	https://sds.chemicalsafety.com/sds/pda/msds/getpdf.ashx?action=msdsdocument&auth=200C200C200C200C2008207A200D2078200C200C200C200C200C200C200C200C200C2008&param1=ZmRwLjFfNTg1OTAzMTNORQ==&unique=1678021872&session=60679ec97dfd8e96885c0cbe0e61b143&hostname=139.28.41.7	1				2	0	1	0	1	0	1		warning	8
Sodium salicylate	54-21-7	organic	solid	160.10	Combi-Blocks	2023-01-02	https://sds.chemicalsafety.com/sds/pda/msds/getpdf.ashx?action=msdsdocument&auth=200C200C200C200C2008207A200D2078200C200C200C200C200C200C200C200C200C2008&param1=ZmRwLjFfMDE0ODUxMTNORQ==&unique=1678021915&session=60679ec97dfd8e96885c0cbe0e61b143&hostname=139.28.41.7	1				2	0	1	0	1	0	1		warning	7
N-(1-Naphthyl)ethylenediamine dihydrochloride	1465-25-4	organic	solid	259.17	Sigma-Aldrich	2022-10-29	https://sds.chemicalsafety.com/sds/pda/msds/getpdf.ashx?action=msdsdocument&auth=200C200C200C200C2008207A200D2078200C200C200C200C200C200C200C200C200C2008&param1=ZmRwLjFfMzc3NDYwMDNORQ==&unique=1678022256&session=60679ec97dfd8e96885c0cbe0e61b143&hostname=139.28.41.7	1.5	2	0.866025	43.3013	2	0	2	0	0	0	1	1	warning	7	9.33333
N-(1-Naphthyl)ethylenediamine dihydrochloride	1465-25-4	organic	solid	259.17	Thermo Fisher	2022-05-05	https://sds.chemicalsafety.com/sds/pda/msds/getpdf.ashx?action=msdsdocument&auth=200C200C200C200C2008207A200D2078200C200C200C200C200C200C200C200C200C2008&param1=ZmRwLjFfNzY3MTAzMTNORQ==&unique=1678022469&session=60679ec97dfd8e96885c0cbe0e61b143&hostname=139.28.41.7	3				4	1	2	1	0	0	1		warning	14
N-(1-Naphthyl)ethylenediamine dihydrochloride	1465-25-4	organic	solid	259.17	Combi-Blocks	2023-01-02	https://sds.chemicalsafety.com/sds/pda/msds/getpdf.ashx?action=msdsdocument&auth=200C200C200C200C2008207A200D2078200C200C200C200C200C200C200C200C200C2008&param1=ZmRwLjFfMTk2NjMxMjNORQ==&unique=1678022419&session=60679ec97dfd8e96885c0cbe0e61b143&hostname=139.28.41.7	1.5				2	0	2	0	0	0	1		warning	7
Silver nitrate	7761-88-8	inorganic	solid	169.87	Sigma-Aldrich	2021-12-13	https://sds.chemicalsafety.com/sds/pda/msds/getpdf.ashx?action=msdsdocument&auth=200C200C200C200C2008207A200D2078200C200C200C200C200C200C200C200C200C2008&param1=ZmRwLjFfODQ0OTI2MDNORQ==&unique=1678022656&session=60679ec97dfd8e96885c0cbe0e61b143&hostname=139.28.41.7	5.75	5.58333	1.50693	26.9898	6	5	1	0	0	0	3	3.66667	danger	19	13.6667
Silver nitrate	7761-88-8	inorganic	solid	169.87	Thermo Fisher	2020-02-14	https://sds.chemicalsafety.com/sds/pda/msds/getpdf.ashx?action=msdsdocument&auth=200C200C200C200C2008207A200D2078200C200C200C200C200C200C200C200C200C2008&param1=ZmRwLjFfMzEwOTAzMTNORQ==&unique=1678022768&session=60679ec97dfd8e96885c0cbe0e61b143&hostname=139.28.41.7	7				8	5	2	1	0	0	4		danger	18
Silver nitrate	7761-88-8	inorganic	solid	169.87	PANREAC QUIMICA	2020-07-23	https://sds.chemicalsafety.com/sds/pda/msds/getpdf.ashx?action=msdsdocument&auth=200C200C200C200C2008207A200D2078200C200C200C200C200C200C200C200C200C2008&param1=ZmRwLjFfMDEzNzg1MDNORQ==&unique=1678022838&session=60679ec97dfd8e96885c0cbe0e61b143&hostname=139.28.41.7	4				5	3	1	0	1	0	4		danger	4
Potassium dichromate	7778-50-9	inorganic	solid	294.18	Sigma-Aldrich	2021-10-26	https://sds.chemicalsafety.com/sds/pda/msds/getpdf.ashx?action=msdsdocument&auth=200C200C200C200C2008207A200D2078200C200C200C200C200C200C200C200C200C2008&param1=ZmRwLjFfMDg4NTgxMjNORQ==&unique=1678023454&session=60679ec97dfd8e96885c0cbe0e61b143&hostname=139.28.41.7	12.75	12.25	0.866025	7.0696	15	10	2	2	1	0	6	5	danger	26	20.6667
Potassium dichromate	7778-50-9	inorganic	solid	294.18	Thermo Fisher	2020-02-14	https://sds.chemicalsafety.com/sds/pda/msds/getpdf.ashx?action=msdsdocument&auth=200C200C200C200C2008207A200D2078200C200C200C200C200C200C200C200C200C2008&param1=ZmRwLjFfNjI1NjAzMTNORQ==&unique=1678023613&session=60679ec97dfd8e96885c0cbe0e61b143&hostname=139.28.41.7	12.75				15	10	2	2	1	0	4		danger	27
Potassium dichromate	7778-50-9	inorganic	solid	294.18	PANREAC QUIMICA	2020-05-04	https://sds.chemicalsafety.com/sds/pda/msds/getpdf.ashx?action=msdsdocument&auth=200C200C200C200C2008207A200D2078200C200C200C200C200C200C200C200C200C2008&param1=ZmRwLjFfNDMxNzg1MDNORQ==&unique=1678023702&session=60679ec97dfd8e96885c0cbe0e61b143&hostname=139.28.41.7	11.25				13	9	2	1	1	0	5		danger	9
Sodium oxalate	62-76-0	inorganic	solid	134.00	Sigma-Aldrich	2020-10-07	https://sds.chemicalsafety.com/sds/pda/msds/getpdf.ashx?action=msdsdocument&auth=200C200C200C200C2008207A200D2078200C200C200C200C200C200C200C200C200C2008&param1=ZmRwLjFfNzU2NDgxMjNORQ==&unique=1678024548&session=60679ec97dfd8e96885c0cbe0e61b143&hostname=139.28.41.7	0.5	0.75	0.433013	57.735	2	0	0	0	2	0	1	1	warning	7	7.66667
Sodium oxalate	62-76-0	inorganic	solid	134.00	Thermo Fisher	2020-02-14	https://sds.chemicalsafety.com/sds/pda/msds/getpdf.ashx?action=msdsdocument&auth=200C200C200C200C2008207A200D2078200C200C200C200C200C200C200C200C200C2008&param1=ZmRwLjFfMzk5ODAzMTNORQ==&unique=1678024638&session=60679ec97dfd8e96885c0cbe0e61b143&hostname=139.28.41.7	1.25				3	0	1	0	2	0	1		warning	9
Sodium oxalate	62-76-0	inorganic	solid	134.00	Combi-Blocks	2023-01-02	https://sds.chemicalsafety.com/sds/pda/msds/getpdf.ashx?action=msdsdocument&auth=200C200C200C200C2008207A200D2078200C200C200C200C200C200C200C200C200C2008&param1=ZmRwLjFfMDc2NjUxMTNORQ==&unique=1678024688&session=60679ec97dfd8e96885c0cbe0e61b143&hostname=139.28.41.7	0.5				2	0	0	0	2	0	1		warning	7
Dimethylglyoxime	95-45-4	organic	solid	116.12	Sigma-Aldrich	2022-10-02	https://sds.chemicalsafety.com/sds/pda/msds/getpdf.ashx?action=msdsdocument&auth=200C200C200C200C2008207A200D2078200C200C200C200C200C200C200C200C200C2008&param1=ZmRwLjFfMjEzOTUwMDNORQ==&unique=1678027869&session=60679ec97dfd8e96885c0cbe0e61b143&hostname=139.28.41.7	0.75	1.41667	0.763763	53.9127	1	0	1	0	0	0	1	1.66667	warning	5	9
Dimethylglyoxime	95-45-4	organic	solid	116.12	Thermo Fisher	2022-03-11	https://sds.chemicalsafety.com/sds/pda/msds/getpdf.ashx?action=msdsdocument&auth=200C200C200C200C2008207A200D2078200C200C200C200C200C200C200C200C200C2008&param1=ZmRwLjFfNDU0MTAzMTNORQ==&unique=1678027981&session=60679ec97dfd8e96885c0cbe0e61b143&hostname=139.28.41.7	1.25				2	0	1	1	0	0	2		danger	12
Dimethylglyoxime	95-45-4	organic	solid	116.12	Combi-Blocks	2023-01-02	https://sds.chemicalsafety.com/sds/pda/msds/getpdf.ashx?action=msdsdocument&auth=200C200C200C200C2008207A200D2078200C200C200C200C200C200C200C200C200C2008&param1=ZmRwLjFfNTQ4MzUxMTNORQ==&unique=1678028038&session=60679ec97dfd8e96885c0cbe0e61b143&hostname=139.28.41.7	2.25				3	1	1	1	0	0	2		danger	10
Sorbic acid	110-44-1	organic	solid	112.13	Sigma-Aldrich	2022-10-19	https://sds.chemicalsafety.com/sds/pda/msds/getpdf.ashx?action=msdsdocument&auth=200C200C200C200C2008207A200D2078200C200C200C200C200C200C200C200C200C2008&param1=ZmRwLjFfOTM2ODYwMDNORQ==&unique=1678029154&session=60679ec97dfd8e96885c0cbe0e61b143&hostname=139.28.41.7	2	2.33333	0.57735	24.7436	3	0	2	1	0	0	1	1	warning	9	12
Sorbic acid	110-44-1	organic	solid	112.13	Thermo Fisher	2020-02-14	https://sds.chemicalsafety.com/sds/pda/msds/getpdf.ashx?action=msdsdocument&auth=200C200C200C200C2008207A200D2078200C200C200C200C200C200C200C200C200C2008&param1=ZmRwLjFfMTI2NjAzMTNORQ==&unique=1678029263&session=60679ec97dfd8e96885c0cbe0e61b143&hostname=139.28.41.7	3				4	1	2	1	0	0	1		warning	14
Sorbic acid	110-44-1	organic	solid	112.13	Combi-Blocks	2023-01-02	https://sds.chemicalsafety.com/sds/pda/msds/getpdf.ashx?action=msdsdocument&auth=200C200C200C200C2008207A200D2078200C200C200C200C200C200C200C200C200C2008&param1=ZmRwLjFfOTc4ODUxMTNORQ==&unique=1678029309&session=60679ec97dfd8e96885c0cbe0e61b143&hostname=139.28.41.7	2				3	0	2	1	0	0	1		warning	13
Tetrabutylammonium tetrafluoroborate	429-42-5	organic	ionic liquid	329.27	Sigma-Aldrich	2020-01-15	https://sds.chemicalsafety.com/sds/pda/msds/getpdf.ashx?action=msdsdocument&auth=200C200C200C200C2008207A200D2078200C200C200C200C200C200C200C200C200C2008&param1=ZmRwLjFfNDQ5OTc2MDNORQ==&unique=1677964096&session=0e1da735f43fe643971f4dc37256385c&hostname=78.8.217.118	2.5	2.66667	0.288675	10.8253	4	1	1	1	1	0	2	1.66667	danger	15	14.3333
Tetrabutylammonium tetrafluoroborate	429-42-5	organic	ionic liquid	329.27	Thermo Fisher	2020-02-14	https://sds.chemicalsafety.com/sds/pda/msds/getpdf.ashx?action=msdsdocument&auth=200C200C200C200C2008207A200D2078200C200C200C200C200C200C200C200C200C2008&param1=ZmRwLjFfOTMxODAzMTNORQ==&unique=1677964098&session=0e1da735f43fe643971f4dc37256385c&hostname=78.8.217.118	3				4	1	2	1	0	0	1		warning	14
Tetrabutylammonium tetrafluoroborate	429-42-5	organic	ionic liquid	329.27	Combi-Blocks	2023-01-02	https://sds.chemicalsafety.com/sds/pda/msds/getpdf.ashx?action=msdsdocument&auth=200C200C200C200C2008207A200D2078200C200C200C200C200C200C200C200C200C2008&param1=ZmRwLjFfMzI3NjQyMTNORQ==&unique=1677964092&session=0e1da735f43fe643971f4dc37256385c&hostname=78.8.217.118	2.5				4	1	1	1	1	0	2		danger	14
Tetrahexylammonium iodide	2138-24-1	organic	ionic liquid	481.58	Sigma-Aldrich	2020-01-15	https://sds.chemicalsafety.com/sds/pda/msds/getpdf.ashx?action=msdsdocument&auth=200C200C200C200C2008207A200D2078200C200C200C200C200C200C200C200C200C2008&param1=ZmRwLjFfOTQ3Mjg2MDNORQ==&unique=1677964299&session=0e1da735f43fe643971f4dc37256385c&hostname=78.8.217.118	2	2.58333	1.01036	39.1108	3	0	2	1	0	0	1	1	warning	13	14.6667
Tetrahexylammonium iodide	2138-24-1	organic	ionic liquid	481.58	Combi-Blocks	2023-01-02	https://sds.chemicalsafety.com/sds/pda/msds/getpdf.ashx?action=msdsdocument&auth=200C200C200C200C2008207A200D2078200C200C200C200C200C200C200C200C200C2008&param1=ZmRwLjFfMzM2ODMxMTNORQ==&unique=1677964300&session=0e1da735f43fe643971f4dc37256385c&hostname=78.8.217.118	2				3	0	2	1	0	0	1		warning	13
Tetrahexylammonium iodide	2138-24-1	organic	ionic liquid	481.58	Thermo Fisher	2020-02-14	https://sds.chemicalsafety.com/sds/pda/msds/getpdf.ashx?action=msdsdocument&auth=200C200C200C200C2008207A200D2078200C200C200C200C200C200C200C200C200C2008&param1=ZmRwLjFfNzAyODAzMTNORQ==&unique=1677964300&session=0e1da735f43fe643971f4dc37256385c&hostname=78.8.217.118	3.75				7	1	2	1	3	0	1		warning	18
Tetrabutylammonium hexafluorophosphate	3109-63-5	organic	ionic liquid	387.43	Sigma-Aldrich	2021-09-28	https://sds.chemicalsafety.com/sds/pda/msds/getpdf.ashx?action=msdsdocument&auth=200C200C200C200C2008207A200D2078200C200C200C200C200C200C200C200C200C2008&param1=ZmRwLjFfMzMzNTc2MDNORQ==&unique=1677964904&session=0e1da735f43fe643971f4dc37256385c&hostname=78.8.217.118	0	1.75	1.56125	89.2143	0	0	0	0	0	0	0	0.666667	none	0	9.66667
Tetrabutylammonium hexafluorophosphate	3109-63-5	organic	ionic liquid	387.43	Thermo Fisher	2022-03-04	https://sds.chemicalsafety.com/sds/pda/msds/getpdf.ashx?action=msdsdocument&auth=200C200C200C200C2008207A200D2078200C200C200C200C200C200C200C200C200C2008&param1=ZmRwLjFfMDM0ODAzMTNORQ==&unique=1677964908&session=0e1da735f43fe643971f4dc37256385c&hostname=78.8.217.118	3				4	1	2	1	0	0	1		warning	14
Tetrabutylammonium hexafluorophosphate	3109-63-5	organic	ionic liquid	387.43	Combi-Blocks	2023-01-02	https://sds.chemicalsafety.com/sds/pda/msds/getpdf.ashx?action=msdsdocument&auth=200C200C200C200C2008207A200D2078200C200C200C200C200C200C200C200C200C2008&param1=ZmRwLjFfNTQ3MTQyMTNORQ==&unique=1677964903&session=0e1da735f43fe643971f4dc37256385c&hostname=78.8.217.118	2.25				4	0	2	1	1	0	1		warning	15
Tetraheptylammonium iodide	3535-83-9	organic	ionic liquid	537.69	Sigma-Aldrich	2020-03-23	https://sds.chemicalsafety.com/sds/pda/msds/getpdf.ashx?action=msdsdocument&auth=200C200C200C200C2008207A200D2078200C200C200C200C200C200C200C200C200C2008&param1=ZmRwLjFfMDM0OTYwMDNORQ==&unique=1677965082&session=0e1da735f43fe643971f4dc37256385c&hostname=78.8.217.118	2	2.33333	0.57735	24.7436	3	0	2	1	0	0	1	1	warning	13	13.3333
Tetraheptylammonium iodide	3535-83-9	organic	ionic liquid	537.69	Combi-Blocks	2023-01-02	https://sds.chemicalsafety.com/sds/pda/msds/getpdf.ashx?action=msdsdocument&auth=200C200C200C200C2008207A200D2078200C200C200C200C200C200C200C200C200C2008&param1=ZmRwLjFfNDAyMTYxMTNORQ==&unique=1677965082&session=0e1da735f43fe643971f4dc37256385c&hostname=78.8.217.118	2				3	0	2	1	0	0	1		warning	13
Tetraheptylammonium iodide	3535-83-9	organic	ionic liquid	537.69	Thermo Fisher	2020-02-14	https://sds.chemicalsafety.com/sds/pda/msds/getpdf.ashx?action=msdsdocument&auth=200C200C200C200C2008207A200D2078200C200C200C200C200C200C200C200C200C2008&param1=ZmRwLjFfMjg0ODAzMTNORQ==&unique=1677965082&session=0e1da735f43fe643971f4dc37256385c&hostname=78.8.217.118	3				4	1	2	1	0	0	1		warning	14
Tetraheptylammonium bromide	4368-51-8	organic	ionic liquid	490.69	Sigma-Aldrich	2021-04-18	https://sds.chemicalsafety.com/sds/pda/msds/getpdf.ashx?action=msdsdocument&auth=200C200C200C200C2008207A200D2078200C200C200C200C200C200C200C200C200C2008&param1=ZmRwLjFfODI3OTc2MDNORQ==&unique=1677965874&session=0e1da735f43fe643971f4dc37256385c&hostname=78.8.217.118	2	2.33333	0.57735	24.7436	3	0	2	1	0	0	1	1	warning	13	13.3333
Tetraheptylammonium bromide	4368-51-8	organic	ionic liquid	490.69	Thermo Fisher	2020-02-14	https://sds.chemicalsafety.com/sds/pda/msds/getpdf.ashx?action=msdsdocument&auth=200C200C200C200C2008207A200D2078200C200C200C200C200C200C200C200C200C2008&param1=ZmRwLjFfOTYxODAzMTNORQ==&unique=1677965879&session=0e1da735f43fe643971f4dc37256385c&hostname=78.8.217.118	3				4	1	2	1	0	0	1		warning	14
Tetraheptylammonium bromide	4368-51-8	organic	ionic liquid	490.69	Combi-Blocks	2023-01-02	https://sds.chemicalsafety.com/sds/pda/msds/getpdf.ashx?action=msdsdocument&auth=200C200C200C200C2008207A200D2078200C200C200C200C200C200C200C200C200C2008&param1=ZmRwLjFfNTY2MzMxMTNORQ==&unique=1677965874&session=0e1da735f43fe643971f4dc37256385c&hostname=78.8.217.118	2				3	0	2	1	0	0	1		warning	13
1-Butyl-3-methylimidazolium methyl sulfate	401788-98-5	organic	ionic liquid	250.32	Sigma-Aldrich	2020-10-02	https://sds.chemicalsafety.com/sds/pda/msds/getpdf.ashx?action=msdsdocument&auth=200C200C200C200C2008207A200D2078200C200C200C200C200C200C200C200C200C2008&param1=ZmRwLjFfODYyMTU2MDNORQ==&unique=1677969442&session=0e1da735f43fe643971f4dc37256385c&hostname=78.8.217.118	2	2.16667	1.25831	58.0756	2	2	0	0	0	0	1	1.33333	danger	11	11.3333
1-Butyl-3-methylimidazolium methyl sulfate	401788-98-5	organic	ionic liquid	250.32	Thermo Fisher	2020-02-21	https://sds.chemicalsafety.com/sds/pda/msds/getpdf.ashx?action=msdsdocument&auth=200C200C200C200C2008207A200D2078200C200C200C200C200C200C200C200C200C2008&param1=ZmRwLjFfMzU3MDEzMTNORQ==&unique=1677969445&session=0e1da735f43fe643971f4dc37256385c&hostname=78.8.217.118	3.5				4	3	0	1	0	0	2		danger	13
1-Butyl-3-methylimidazolium methyl sulfate	401788-98-5	organic	ionic liquid	250.32	Combi-Blocks	2023-01-02	https://sds.chemicalsafety.com/sds/pda/msds/getpdf.ashx?action=msdsdocument&auth=200C200C200C200C2008207A200D2078200C200C200C200C200C200C200C200C200C2008&param1=ZmRwLjFfMjAyMjYxMTNORQ==&unique=1677969439&session=0e1da735f43fe643971f4dc37256385c&hostname=78.8.217.118	1				1	1	0	0	0	0	1		danger	10
1,3-Dimethylimidazolium dimethyl phosphate	654058-04-5	organic	ionic liquid	222.18	Sigma-Aldrich	2020-01-15	https://sds.chemicalsafety.com/sds/pda/msds/getpdf.ashx?action=msdsdocument&auth=200C200C200C200C2008207A200D2078200C200C200C200C200C200C200C200C200C2008&param1=ZmRwLjFfMzkxMzE0MDNORQ==&unique=1678014753&session=0e1da735f43fe643971f4dc37256385c&hostname=78.8.217.118	2	2.08333	0.877971	42.1426	2	2	0	0	0	0	1	1.33333	danger	9	11.3333
1,3-Dimethylimidazolium dimethyl phosphate	654058-04-5	organic	ionic liquid	222.18	Combi-Blocks	2023-01-02	https://sds.chemicalsafety.com/sds/pda/msds/getpdf.ashx?action=msdsdocument&auth=200C200C200C200C2008207A200D2078200C200C200C200C200C200C200C200C200C2008&param1=ZmRwLjFfNDk4MTYxMTNORQ==&unique=1678014754&session=0e1da735f43fe643971f4dc37256385c&hostname=78.8.217.118	1.25				2	1	0	0	1	0	2		danger	11
1,3-Dimethylimidazolium dimethyl phosphate	654058-04-5	organic	ionic liquid	222.18	Thermo Fisher	2020-02-21	https://sds.chemicalsafety.com/sds/pda/msds/getpdf.ashx?action=msdsdocument&auth=200C200C200C200C2008207A200D2078200C200C200C200C200C200C200C200C200C2008&param1=ZmRwLjFfNjQ4MDEzMTNORQ==&unique=1678014755&session=0e1da735f43fe643971f4dc37256385c&hostname=78.8.217.118	3				4	1	2	1	0	0	1		warning	14
1,3-Dimethylimidazolium methyl sulfate	97345-90-9	organic	ionic liquid/solid	208.2	Combi-Blocks	2023-01-02	https://sds.chemicalsafety.com/sds/pda/msds/getpdf.ashx?action=msdsdocument&auth=200C200C200C200C2008207A200D2078200C200C200C200C200C200C200C200C200C2008&param1=ZmRwLjFfNTE2MjYxMTNORQ==&unique=1678015825&session=0e1da735f43fe643971f4dc37256385c&hostname=78.8.217.118	2	2.33333	0.57735	24.7436	3	0	2	1	0	0	1	1	warning	13	12.3333
1,3-Dimethylimidazolium methyl sulfate	97345-90-9	organic	ionic liquid/solid	208.2	Sigma-Aldrich	2022-04-15	https://sds.chemicalsafety.com/sds/pda/msds/getpdf.ashx?action=msdsdocument&auth=200C200C200C200C2008207A200D2078200C200C200C200C200C200C200C200C200C2008&param1=ZmRwLjFfNDY2MzkwMDNORQ==&unique=1678015824&session=0e1da735f43fe643971f4dc37256385c&hostname=78.8.217.118	2				2	2	0	0	0	0	1		danger	10
1,3-Dimethylimidazolium methyl sulfate	97345-90-9	organic	ionic liquid/solid	208.2	Thermo Fisher	2020-02-25	https://sds.chemicalsafety.com/sds/pda/msds/getpdf.ashx?action=msdsdocument&auth=200C200C200C200C2008207A200D2078200C200C200C200C200C200C200C200C200C2008&param1=ZmRwLjFfMjQzMTEzMTNORQ==&unique=1678015825&session=0e1da735f43fe643971f4dc37256385c&hostname=78.8.217.118	3				4	1	2	1	0	0	1		warning	14
1-Ethyl-3-methylimidazolium chloride	65039-09-0	organic	ionic liquid/solid	146.62	Sigma-Aldrich	2020-09-25	https://sds.chemicalsafety.com/sds/pda/msds/getpdf.ashx?action=msdsdocument&auth=200C200C200C200C2008207A200D2078200C200C200C200C200C200C200C200C200C2008&param1=ZmRwLjFfMTMwNzU2MDNORQ==&unique=1678016926&session=0e1da735f43fe643971f4dc37256385c&hostname=78.8.217.118	1.5	2	0.866025	43.3013	2	0	2	0	0	0	1	1	warning	7	9.33333
1-Ethyl-3-methylimidazolium chloride	65039-09-0	organic	ionic liquid/solid	146.62	Combi-Blocks	2023-01-02	https://sds.chemicalsafety.com/sds/pda/msds/getpdf.ashx?action=msdsdocument&auth=200C200C200C200C2008207A200D2078200C200C200C200C200C200C200C200C200C2008&param1=ZmRwLjFfNzEwMzYxMTNORQ==&unique=1678016924&session=0e1da735f43fe643971f4dc37256385c&hostname=78.8.217.118	1.5				2	0	2	0	0	0	1		warning	7
1-Ethyl-3-methylimidazolium chloride	65039-09-0	organic	ionic liquid/solid	146.62	Thermo Fisher	2020-02-14	https://sds.chemicalsafety.com/sds/pda/msds/getpdf.ashx?action=msdsdocument&auth=200C200C200C200C2008207A200D2078200C200C200C200C200C200C200C200C200C2008&param1=ZmRwLjFfMzczMTEzMTNORQ==&unique=1678016928&session=0e1da735f43fe643971f4dc37256385c&hostname=78.8.217.118	3				4	1	2	1	0	0	1		warning	14
1-Ethyl-3-methylimidazolium hexafluorophosphate	155371-19-0	organic	ionic liquid/solid	256.13	Sigma-Aldrich	2020-02-05	https://sds.chemicalsafety.com/sds/pda/msds/getpdf.ashx?action=msdsdocument&auth=200C200C200C200C2008207A200D2078200C200C200C200C200C200C200C200C200C2008&param1=ZmRwLjFfNDk1NjkwMDNORQ==&unique=1678017155&session=0e1da735f43fe643971f4dc37256385c&hostname=78.8.217.118	1.5	1.5	0	0	2	0	2	0	0	0	1	1	warning	7	7
1-Ethyl-3-methylimidazolium hexafluorophosphate	155371-19-0	organic	ionic liquid/solid	256.13	Combi-Blocks	2023-01-02	https://sds.chemicalsafety.com/sds/pda/msds/getpdf.ashx?action=msdsdocument&auth=200C200C200C200C2008207A200D2078200C200C200C200C200C200C200C200C200C2008&param1=ZmRwLjFfMjY5MzMxMTNORQ==&unique=1678017153&session=0e1da735f43fe643971f4dc37256385c&hostname=78.8.217.118	1.5				2	0	2	0	0	0	1		warning	7
1-Ethyl-3-methylimidazolium hexafluorophosphate	155371-19-0	organic	ionic liquid/solid	256.13	Thermo Fisher	2020-02-28	https://sds.chemicalsafety.com/sds/pda/msds/getpdf.ashx?action=msdsdocument&auth=200C200C200C200C2008207A200D2078200C200C200C200C200C200C200C200C200C2008&param1=ZmRwLjFfNDQ0MTEzMTNORQ==&unique=1678017166&session=0e1da735f43fe643971f4dc37256385c&hostname=78.8.217.118	1.5				2	0	2	0	0	0	1		warning	7
1-Ethyl-3-methylimidazolium trifluoromethanesulfonate	145022-44-2	organic	ionic liquid	260.23	Sigma-Aldrich	2020-02-14	https://sds.chemicalsafety.com/sds/pda/msds/getpdf.ashx?action=msdsdocument&auth=200C200C200C200C2008207A200D2078200C200C200C200C200C200C200C200C200C2008&param1=ZmRwLjFfNjM4NjU2MDNORQ==&unique=1678017426&session=0e1da735f43fe643971f4dc37256385c&hostname=78.8.217.118	0	1	0.866025	86.6025	0	0	0	0	0	0	0	0.666667	none	0	4.66667
1-Ethyl-3-methylimidazolium trifluoromethanesulfonate	145022-44-2	organic	ionic liquid	260.23	Thermo Fisher	2020-02-28	https://sds.chemicalsafety.com/sds/pda/msds/getpdf.ashx?action=msdsdocument&auth=200C200C200C200C2008207A200D2078200C200C200C200C200C200C200C200C200C2008&param1=ZmRwLjFfMTU3MTEzMTNORQ==&unique=1678017428&session=0e1da735f43fe643971f4dc37256385c&hostname=78.8.217.118	1.5				2	0	2	0	0	0	1		warning	7
1-Ethyl-3-methylimidazolium trifluoromethanesulfonate	145022-44-2	organic	ionic liquid	260.23	Combi-Blocks	2023-01-02	https://sds.chemicalsafety.com/sds/pda/msds/getpdf.ashx?action=msdsdocument&auth=200C200C200C200C2008207A200D2078200C200C200C200C200C200C200C200C200C2008&param1=ZmRwLjFfODU5MTYxMTNORQ==&unique=1678017424&session=0e1da735f43fe643971f4dc37256385c&hostname=78.8.217.118	1.5				2	0	2	0	0	0	1		warning	7
1-Ethyl-3-methylimidazolium tetrafluoroborate	143314-16-3	organic	ionic liquid	197.97	Sigma-Aldrich	2020-01-13	https://sds.chemicalsafety.com/sds/pda/msds/getpdf.ashx?action=msdsdocument&auth=200C200C200C200C2008207A200D2078200C200C200C200C200C200C200C200C200C2008&param1=ZmRwLjFfMjA2NjkwMDNORQ==&unique=1678017660&session=0e1da735f43fe643971f4dc37256385c&hostname=78.8.217.118	1.75	1.41667	0.381881	26.9563	3	0	2	0	1	0	2	1.66667	warning	6	6.33333
1-Ethyl-3-methylimidazolium tetrafluoroborate	143314-16-3	organic	ionic liquid	197.97	Combi-Blocks	2023-01-02	https://sds.chemicalsafety.com/sds/pda/msds/getpdf.ashx?action=msdsdocument&auth=200C200C200C200C2008207A200D2078200C200C200C200C200C200C200C200C200C2008&param1=ZmRwLjFfNjQwMDYxMTNORQ==&unique=1678017661&session=0e1da735f43fe643971f4dc37256385c&hostname=78.8.217.118	1				2	0	1	0	1	0	2		warning	6
1-Ethyl-3-methylimidazolium tetrafluoroborate	143314-16-3	organic	ionic liquid	197.97	Thermo Fisher	2020-02-18	https://sds.chemicalsafety.com/sds/pda/msds/getpdf.ashx?action=msdsdocument&auth=200C200C200C200C2008207A200D2078200C200C200C200C200C200C200C200C200C2008&param1=ZmRwLjFfOTYxMTEzMTNORQ==&unique=1678017661&session=0e1da735f43fe643971f4dc37256385c&hostname=78.8.217.118	1.5				2	0	2	0	0	0	1		warning	7
1-Ethyl-3-methylimidazolium iodide	35935-34-3	organic	ionic liquid/solid	238.07	Combi-Blocks	2023-01-02	https://sds.chemicalsafety.com/sds/pda/msds/getpdf.ashx?action=msdsdocument&auth=200C200C200C200C2008207A200D2078200C200C200C200C200C200C200C200C200C2008&param1=ZmRwLjFfODg3MzYxMTNORQ==&unique=1678018048&session=0e1da735f43fe643971f4dc37256385c&hostname=78.8.217.118	2.25	2.33333	0.629153	26.9637	3	1	1	1	0	0	2	1.66667	danger	12	12.3333
1-Ethyl-3-methylimidazolium iodide	35935-34-3	organic	ionic liquid/solid	238.07	Thermo Fisher	2020-02-25	https://sds.chemicalsafety.com/sds/pda/msds/getpdf.ashx?action=msdsdocument&auth=200C200C200C200C2008207A200D2078200C200C200C200C200C200C200C200C200C2008&param1=ZmRwLjFfODc0MTEzMTNORQ==&unique=1678018048&session=0e1da735f43fe643971f4dc37256385c&hostname=78.8.217.118	3				4	1	2	1	0	0	1		warning	14
1-Ethyl-3-methylimidazolium iodide	35935-34-3	organic	ionic liquid/solid	238.07	Sigma-Aldrich	2020-03-26	https://sds.chemicalsafety.com/sds/pda/msds/getpdf.ashx?action=msdsdocument&auth=200C200C200C200C2008207A200D2078200C200C200C200C200C200C200C200C200C2008&param1=ZmRwLjFfNjk1NjkwMDNORQ==&unique=1678018047&session=0e1da735f43fe643971f4dc37256385c&hostname=78.8.217.118	1.75				3	1	0	1	1	0	2		danger	11
1-Ethyl-3-methylimidazolium ethyl sulfate	342573-75-5	organic	ionic liquid	236.3	Combi-Blocks	2023-01-02	https://sds.chemicalsafety.com/sds/pda/msds/getpdf.ashx?action=msdsdocument&auth=200C200C200C200C2008207A200D2078200C200C200C200C200C200C200C200C200C2008&param1=ZmRwLjFfMTU5NDYxMTNORQ==&unique=1678018360&session=0e1da735f43fe643971f4dc37256385c&hostname=78.8.217.118	2	2.83333	0.763763	26.9563	3	0	2	1	0	0	1	1.33333	warning	13	13
1-Ethyl-3-methylimidazolium ethyl sulfate	342573-75-5	organic	ionic liquid	236.3	Sigma-Aldrich	2020-01-15	https://sds.chemicalsafety.com/sds/pda/msds/getpdf.ashx?action=msdsdocument&auth=200C200C200C200C2008207A200D2078200C200C200C200C200C200C200C200C200C2008&param1=ZmRwLjFfMjE2MDU2MDNORQ==&unique=1678018360&session=0e1da735f43fe643971f4dc37256385c&hostname=78.8.217.118	3.5				4	2	2	0	0	0	2		danger	12
1-Ethyl-3-methylimidazolium ethyl sulfate	342573-75-5	organic	ionic liquid	236.3	Thermo Fisher	2020-02-19	https://sds.chemicalsafety.com/sds/pda/msds/getpdf.ashx?action=msdsdocument&auth=200C200C200C200C2008207A200D2078200C200C200C200C200C200C200C200C200C2008&param1=ZmRwLjFfMzM0MTEzMTNORQ==&unique=1678018360&session=0e1da735f43fe643971f4dc37256385c&hostname=78.8.217.118	3				4	1	2	1	0	0	1		warning	14
1-Ethyl-3-methylimidazolium dicyanamide	370865-89-7	organic	ionic liquid	177.21	Combi-Blocks	2023-01-02	https://sds.chemicalsafety.com/sds/pda/msds/getpdf.ashx?action=msdsdocument&auth=200C200C200C200C2008207A200D2078200C200C200C200C200C200C200C200C200C2008&param1=ZmRwLjFfODc5OTMwMTNORQ==&unique=1678018651&session=0e1da735f43fe643971f4dc37256385c&hostname=78.8.217.118	0	1.33333	1.18145	88.609	0	0	0	0	0	0	0	0.666667	none	0	8.66667
1-Ethyl-3-methylimidazolium dicyanamide	370865-89-7	organic	ionic liquid	177.21	Sigma-Aldrich	2020-01-10	https://sds.chemicalsafety.com/sds/pda/msds/getpdf.ashx?action=msdsdocument&auth=200C200C200C200C2008207A200D2078200C200C200C200C200C200C200C200C200C2008&param1=ZmRwLjFfMzI0NjU2MDNORQ==&unique=1678018652&session=0e1da735f43fe643971f4dc37256385c&hostname=78.8.217.118	2.25				4	0	2	1	1	0	1		warning	15
1-Ethyl-3-methylimidazolium dicyanamide	370865-89-7	organic	ionic liquid	177.21	Thermo Fisher	2020-02-21	https://sds.chemicalsafety.com/sds/pda/msds/getpdf.ashx?action=msdsdocument&auth=200C200C200C200C2008207A200D2078200C200C200C200C200C200C200C200C200C2008&param1=ZmRwLjFfNzQ3MTEzMTNORQ==&unique=1678018652&session=0e1da735f43fe643971f4dc37256385c&hostname=78.8.217.118	1.75				3	0	2	0	1	0	1		warning	11
1-Ethyl-3-methylimidazolium hydrogen sulfate	412009-61-1	organic	ionic liquid	208.2	Combi-Blocks	2023-01-02	https://sds.chemicalsafety.com/sds/pda/msds/getpdf.ashx?action=msdsdocument&auth=200C200C200C200C2008207A200D2078200C200C200C200C200C200C200C200C200C2008&param1=ZmRwLjFfOTIxOTUxMTNORQ==&unique=1678020325&session=0e1da735f43fe643971f4dc37256385c&hostname=78.8.217.118	1	2.16667	1.25831	58.0756	1	1	0	0	0	0	1	1.33333	danger	10	11.3333
1-Ethyl-3-methylimidazolium hydrogen sulfate	412009-61-1	organic	ionic liquid	208.2	Thermo Fisher	2020-02-21	https://sds.chemicalsafety.com/sds/pda/msds/getpdf.ashx?action=msdsdocument&auth=200C200C200C200C2008207A200D2078200C200C200C200C200C200C200C200C200C2008&param1=ZmRwLjFfMTQ0MTEzMTNORQ==&unique=1678020326&session=0e1da735f43fe643971f4dc37256385c&hostname=78.8.217.118	3.5				4	3	0	1	0	0	2		danger	13
1-Ethyl-3-methylimidazolium hydrogen sulfate	412009-61-1	organic	ionic liquid	208.2	Sigma-Aldrich	2020-10-10	https://sds.chemicalsafety.com/sds/pda/msds/getpdf.ashx?action=msdsdocument&auth=200C200C200C200C2008207A200D2078200C200C200C200C200C200C200C200C200C2008&param1=ZmRwLjFfNTIxODU2MDNORQ==&unique=1678020325&session=0e1da735f43fe643971f4dc37256385c&hostname=78.8.217.118	2				2	2	0	0	0	0	1		danger	11
1-Ethyl-3-methylimidazolium acetate	143314-17-4	organic	ionic liquid	170.2	Combi-Blocks	2023-01-02	https://sds.chemicalsafety.com/sds/pda/msds/getpdf.ashx?action=msdsdocument&auth=200C200C200C200C2008207A200D2078200C200C200C200C200C200C200C200C200C2008&param1=ZmRwLjFfNTc3MTYxMTNORQ==&unique=1678020957&session=0e1da735f43fe643971f4dc37256385c&hostname=78.8.217.118	2	1.66667	1.52753	91.6515	3	0	2	1	0	0	1	0.666667	warning	13	9
1-Ethyl-3-methylimidazolium acetate	143314-17-4	organic	ionic liquid	170.2	Sigma-Aldrich	2020-01-20	https://sds.chemicalsafety.com/sds/pda/msds/getpdf.ashx?action=msdsdocument&auth=200C200C200C200C2008207A200D2078200C200C200C200C200C200C200C200C200C2008&param1=ZmRwLjFfMTcwNzI0MDNORQ==&unique=1678020957&session=0e1da735f43fe643971f4dc37256385c&hostname=78.8.217.118	0				0	0	0	0	0	0	0		none	0
1-Ethyl-3-methylimidazolium acetate	143314-17-4	organic	ionic liquid	170.2	Thermo Fisher	2020-02-25	https://sds.chemicalsafety.com/sds/pda/msds/getpdf.ashx?action=msdsdocument&auth=200C200C200C200C2008207A200D2078200C200C200C200C200C200C200C200C200C2008&param1=ZmRwLjFfMjgzMTEzMTNORQ==&unique=1678020957&session=0e1da735f43fe643971f4dc37256385c&hostname=78.8.217.118	3				4	1	2	1	0	0	1		warning	14
1-Ethyl-3-methylimidazolium methyl sulfate	516474-01-4	organic	ionic liquid	222.3	Combi-Blocks	2023-01-02	https://sds.chemicalsafety.com/sds/pda/msds/getpdf.ashx?action=msdsdocument&auth=200C200C200C200C2008207A200D2078200C200C200C200C200C200C200C200C200C2008&param1=ZmRwLjFfMDYwMTYxMTNORQ==&unique=1678021593&session=0e1da735f43fe643971f4dc37256385c&hostname=78.8.217.118	2	2.5	0.5	20	3	0	2	1	0	0	1	1.33333	warning	13	13
1-Ethyl-3-methylimidazolium methyl sulfate	516474-01-4	organic	ionic liquid	222.3	Thermo Fisher	2020-02-25	https://sds.chemicalsafety.com/sds/pda/msds/getpdf.ashx?action=msdsdocument&auth=200C200C200C200C2008207A200D2078200C200C200C200C200C200C200C200C200C2008&param1=ZmRwLjFfMzc0MTEzMTNORQ==&unique=1678021593&session=0e1da735f43fe643971f4dc37256385c&hostname=78.8.217.118	3				4	1	2	1	0	0	1		warning	14
1-Ethyl-3-methylimidazolium methyl sulfate	516474-01-4	organic	ionic liquid	222.3	Sigma-Aldrich	2020-01-22	https://sds.chemicalsafety.com/sds/pda/msds/getpdf.ashx?action=msdsdocument&auth=200C200C200C200C2008207A200D2078200C200C200C200C200C200C200C200C200C2008&param1=ZmRwLjFfOTk1NjkwMDNORQ==&unique=1678021593&session=0e1da735f43fe643971f4dc37256385c&hostname=78.8.217.118	2.5				3	2	0	1	0	0	2		danger	12
1-Ethyl-3-methylimidazolium diethyl phosphate	848641-69-0	organic	ionic liquid	264.3	Combi-Blocks	2023-01-02	https://sds.chemicalsafety.com/sds/pda/msds/getpdf.ashx?action=msdsdocument&auth=200C200C200C200C2008207A200D2078200C200C200C200C200C200C200C200C200C2008&param1=ZmRwLjFfMDQwMzYxMTNORQ==&unique=1678022563&session=0e1da735f43fe643971f4dc37256385c&hostname=78.8.217.118	1.25	2.41667	1.25831	52.0678	2	1	0	0	1	0	2	2	danger	11	12.3333
1-Ethyl-3-methylimidazolium diethyl phosphate	848641-69-0	organic	ionic liquid	264.3	Sigma-Aldrich	2020-09-13	https://sds.chemicalsafety.com/sds/pda/msds/getpdf.ashx?action=msdsdocument&auth=200C200C200C200C2008207A200D2078200C200C200C200C200C200C200C200C200C2008&param1=ZmRwLjFfMTk1NjkwMDNORQ==&unique=1678022563&session=0e1da735f43fe643971f4dc37256385c&hostname=78.8.217.118	2.25				3	2	0	0	1	0	2		danger	11
1-Ethyl-3-methylimidazolium diethyl phosphate	848641-69-0	organic	ionic liquid	264.3	Thermo Fisher	2020-02-21	https://sds.chemicalsafety.com/sds/pda/msds/getpdf.ashx?action=msdsdocument&auth=200C200C200C200C2008207A200D2078200C200C200C200C200C200C200C200C200C2008&param1=ZmRwLjFfNDM0MTEzMTNORQ==&unique=1678022564&session=0e1da735f43fe643971f4dc37256385c&hostname=78.8.217.118	3.75				5	3	0	1	1	0	2		danger	15
1-Hexyl-3-methylimidazolium chloride	171058-17-6	organic	ionic liquid	202.72	Sigma-Aldrich	2020-03-26	https://sds.chemicalsafety.com/sds/pda/msds/getpdf.ashx?action=msdsdocument&auth=200C200C200C200C2008207A200D2078200C200C200C200C200C200C200C200C200C2008&param1=ZmRwLjFfMTI3NjkwMDNORQ==&unique=1678022772&session=0e1da735f43fe643971f4dc37256385c&hostname=78.8.217.118	1.5	1.58333	1.6266	102.733	2	0	2	0	0	0	1	0.666667	warning	7	8
1-Hexyl-3-methylimidazolium chloride	171058-17-6	organic	ionic liquid	202.72	Thermo Fisher	2020-02-14	https://sds.chemicalsafety.com/sds/pda/msds/getpdf.ashx?action=msdsdocument&auth=200C200C200C200C2008207A200D2078200C200C200C200C200C200C200C200C200C2008&param1=ZmRwLjFfNjMwMjEzMTNORQ==&unique=1678022773&session=0e1da735f43fe643971f4dc37256385c&hostname=78.8.217.118	3.25				5	1	2	1	1	0	1		warning	17
1-Hexyl-3-methylimidazolium chloride	171058-17-6	organic	ionic liquid	202.72	Combi-Blocks	2023-01-02	https://sds.chemicalsafety.com/sds/pda/msds/getpdf.ashx?action=msdsdocument&auth=200C200C200C200C2008207A200D2078200C200C200C200C200C200C200C200C200C2008&param1=ZmRwLjFfMjk3MTQyMTNORQ==&unique=1678022772&session=0e1da735f43fe643971f4dc37256385c&hostname=78.8.217.118	0				0	0	0	0	0	0	0		none	0
1-Hexyl-3-methylimidazolium tetrafluoroborate	244193-50-8	organic	ionic liquid	254.1	Combi-Blocks	2023-01-02	https://sds.chemicalsafety.com/sds/pda/msds/getpdf.ashx?action=msdsdocument&auth=200C200C200C200C2008207A200D2078200C200C200C200C200C200C200C200C200C2008&param1=ZmRwLjFfNTQ5NjQyMTNORQ==&unique=1678040767&session=0e1da735f43fe643971f4dc37256385c&hostname=78.8.217.118	1.5	2	0.866025	43.3013	2	0	2	0	0	0	1	1	warning	7	9.33333
1-Hexyl-3-methylimidazolium tetrafluoroborate	244193-50-8	organic	ionic liquid	254.1	Thermo Fisher	2020-02-14	https://sds.chemicalsafety.com/sds/pda/msds/getpdf.ashx?action=msdsdocument&auth=200C200C200C200C2008207A200D2078200C200C200C200C200C200C200C200C200C2008&param1=ZmRwLjFfMTEwMjEzMTNORQ==&unique=1678040771&session=0e1da735f43fe643971f4dc37256385c&hostname=78.8.217.118	3				4	1	2	1	0	0	1		warning	14
1-Hexyl-3-methylimidazolium tetrafluoroborate	244193-50-8	organic	ionic liquid	254.1	Sigma-Aldrich	2020-03-23	https://sds.chemicalsafety.com/sds/pda/msds/getpdf.ashx?action=msdsdocument&auth=200C200C200C200C2008207A200D2078200C200C200C200C200C200C200C200C200C2008&param1=ZmRwLjFfNDI3NjkwMDNORQ==&unique=1678040767&session=0e1da735f43fe643971f4dc37256385c&hostname=78.8.217.118	1.5				2	0	2	0	0	0	1		warning	7
1-Methyl-3-octylimidazolium chloride	64697-40-1	organic	ionic liquid	230.78	Sigma-Aldrich	2020-05-12	https://sds.chemicalsafety.com/sds/pda/msds/getpdf.ashx?action=msdsdocument&auth=200C200C200C200C2008207A200D2078200C200C200C200C200C200C200C200C200C2008&param1=ZmRwLjFfMTg5NjkwMDNORQ==&unique=1678042009&session=0e1da735f43fe643971f4dc37256385c&hostname=78.8.217.118	1.5	2.16667	0.763763	35.2506	2	0	2	0	0	0	1	1	warning	7	11.3333
1-Methyl-3-octylimidazolium chloride	64697-40-1	organic	ionic liquid	230.78	Combi-Blocks	2023-01-02	https://sds.chemicalsafety.com/sds/pda/msds/getpdf.ashx?action=msdsdocument&auth=200C200C200C200C2008207A200D2078200C200C200C200C200C200C200C200C200C2008&param1=ZmRwLjFfNTA3NDYxMTNORQ==&unique=1678042007&session=0e1da735f43fe643971f4dc37256385c&hostname=78.8.217.118	2				3	0	2	1	0	0	1		warning	13
1-Methyl-3-octylimidazolium chloride	64697-40-1	organic	ionic liquid	230.78	Thermo Fisher	2020-02-14	https://sds.chemicalsafety.com/sds/pda/msds/getpdf.ashx?action=msdsdocument&auth=200C200C200C200C2008207A200D2078200C200C200C200C200C200C200C200C200C2008&param1=ZmRwLjFfNjE2MTEzMTNORQ==&unique=1678042007&session=0e1da735f43fe643971f4dc37256385c&hostname=78.8.217.118	3				4	1	2	1	0	0	1		warning	14
1-Butyl-1-methylpyrrolidinium bis(trifluoromethylsulfonyl)imide	223437-11-4	organic	ionic liquid	422.41	Sigma-Aldrich	2022-06-16	https://sds.chemicalsafety.com/sds/pda/msds/getpdf.ashx?action=msdsdocument&auth=200C200C200C200C2008207A200D2078200C200C200C200C200C200C200C200C200C2008&param1=ZmRwLjFfNDE4OTkxMjNORQ==&unique=1678051187&session=0e1da735f43fe643971f4dc37256385c&hostname=78.8.217.118	0	1	0.866025	86.6025	0	0	0	0	0	0	0	0.666667	none	0	4.66667
1-Butyl-1-methylpyrrolidinium bis(trifluoromethylsulfonyl)imide	223437-11-4	organic	ionic liquid	422.41	Thermo Fisher	2020-02-21	https://sds.chemicalsafety.com/sds/pda/msds/getpdf.ashx?action=msdsdocument&auth=200C200C200C200C2008207A200D2078200C200C200C200C200C200C200C200C200C2008&param1=ZmRwLjFfMTY4MDEzMTNORQ==&unique=1678051189&session=0e1da735f43fe643971f4dc37256385c&hostname=78.8.217.118	1.5				2	0	2	0	0	0	1		warning	7
1-Butyl-1-methylpyrrolidinium bis(trifluoromethylsulfonyl)imide	223437-11-4	organic	ionic liquid	422.41	Combi-Blocks	2023-01-02	https://sds.chemicalsafety.com/sds/pda/msds/getpdf.ashx?action=msdsdocument&auth=200C200C200C200C2008207A200D2078200C200C200C200C200C200C200C200C200C2008&param1=ZmRwLjFfNTE3NzYxMTNORQ==&unique=1678051186&session=0e1da735f43fe643971f4dc37256385c&hostname=78.8.217.118	1.5				2	0	2	0	0	0	1		warning	7
Trimethylsulfonium iodide	2181-42-2	organic	ionic liquid/solid	204.1	Combi-Blocks	2023-01-02	https://sds.chemicalsafety.com/sds/pda/msds/getpdf.ashx?action=msdsdocument&auth=200C200C200C200C2008207A200D2078200C200C200C200C200C200C200C200C200C2008&param1=ZmRwLjFfNzM0NjIxMTNORQ==&unique=1678052329&session=0e1da735f43fe643971f4dc37256385c&hostname=78.8.217.118	2	1.33333	1.1547	86.6025	3	0	2	1	0	0	1	0.666667	warning	13	8.66667
Trimethylsulfonium iodide	2181-42-2	organic	ionic liquid/solid	204.1	Thermo Fisher	2020-02-14	https://sds.chemicalsafety.com/sds/pda/msds/getpdf.ashx?action=msdsdocument&auth=200C200C200C200C2008207A200D2078200C200C200C200C200C200C200C200C200C2008&param1=ZmRwLjFfNTkxOTAzMTNORQ==&unique=1678052329&session=0e1da735f43fe643971f4dc37256385c&hostname=78.8.217.118	0				0	0	0	0	0	0	0		none	0
Trimethylsulfonium iodide	2181-42-2	organic	ionic liquid/solid	204.1	Sigma-Aldrich	2020-01-15	https://sds.chemicalsafety.com/sds/pda/msds/getpdf.ashx?action=msdsdocument&auth=200C200C200C200C2008207A200D2078200C200C200C200C200C200C200C200C200C2008&param1=ZmRwLjFfODc0MDcwMDNORQ==&unique=1678052328&session=0e1da735f43fe643971f4dc37256385c&hostname=78.8.217.118	2				3	0	2	1	0	0	1		warning	13
Triethylsulfonium bis(trifluoromethylsulfonyl)imide	321746-49-0	organic	ionic liquid	399.39	Combi-Blocks	2023-01-02	https://sds.chemicalsafety.com/sds/pda/msds/getpdf.ashx?action=msdsdocument&auth=200C200C200C200C2008207A200D2078200C200C200C200C200C200C200C200C200C2008&param1=ZmRwLjFfNjMzOTMxMTNORQ==&unique=1678052488&session=0e1da735f43fe643971f4dc37256385c&hostname=78.8.217.118	2	2.33333	0.57735	24.7436	3	0	2	1	0	0	1	1.33333	warning	13	11.6667
Triethylsulfonium bis(trifluoromethylsulfonyl)imide	321746-49-0	organic	ionic liquid	399.39	Sigma-Aldrich	2020-04-23	https://sds.chemicalsafety.com/sds/pda/msds/getpdf.ashx?action=msdsdocument&auth=200C200C200C200C2008207A200D2078200C200C200C200C200C200C200C200C200C2008&param1=ZmRwLjFfNTY2Mzg2MDNORQ==&unique=1678052490&session=0e1da735f43fe643971f4dc37256385c&hostname=78.8.217.118	2				3	1	0	2	0	0	2		danger	8
Triethylsulfonium bis(trifluoromethylsulfonyl)imide	321746-49-0	organic	ionic liquid	399.39	Thermo Fisher	2020-02-21	https://sds.chemicalsafety.com/sds/pda/msds/getpdf.ashx?action=msdsdocument&auth=200C200C200C200C2008207A200D2078200C200C200C200C200C200C200C200C200C2008&param1=ZmRwLjFfODg4NjAzMTNORQ==&unique=1678052490&session=0e1da735f43fe643971f4dc37256385c&hostname=78.8.217.118	3				4	1	2	1	0	0	1		warning	14
1-Methylurea	598-50-5	organic	solid, DES component	74.08	Sigma-Aldrich	2022-04-28	https://sds.chemicalsafety.com/sds/pda/msds/getpdf.ashx?action=msdsdocument&auth=200C200C200C200C2008207A200D2078200C200C200C200C200C200C200C200C200C2008&param1=ZmRwLjFfNjExNjYwMDNORQ==&unique=1678106053&session=60679ec97dfd8e96885c0cbe0e61b143&hostname=139.28.41.7	0	0.75	1.29904	173.205	0	0	0	0	0	0	0	0.333333	none	0	5
1-Methylurea	598-50-5	organic	solid, DES component	74.08	Thermo Fisher	2020-02-14	https://sds.chemicalsafety.com/sds/pda/msds/getpdf.ashx?action=msdsdocument&auth=200C200C200C200C2008207A200D2078200C200C200C200C200C200C200C200C200C2008&param1=ZmRwLjFfMzA0NTAzMTNORQ==&unique=1678106145&session=60679ec97dfd8e96885c0cbe0e61b143&hostname=139.28.41.7	0				0	0	0	0	0	0	0		none	0
1-Methylurea	598-50-5	organic	solid, DES component	74.08	Combi-Blocks	2023-01-02	https://sds.chemicalsafety.com/sds/pda/msds/getpdf.ashx?action=msdsdocument&auth=200C200C200C200C2008207A200D2078200C200C200C200C200C200C200C200C200C2008&param1=ZmRwLjFfNzE3NTUxMTNORQ==&unique=1678106177&session=60679ec97dfd8e96885c0cbe0e61b143&hostname=139.28.41.7	2.25				4	0	2	1	1	0	1		warning	15
1,3-Dimethylurea	96-31-1	organic	solid, DES component	88.11	Sigma-Aldrich	2022-04-28	https://sds.chemicalsafety.com/sds/pda/msds/getpdf.ashx?action=msdsdocument&auth=200C200C200C200C2008207A200D2078200C200C200C200C200C200C200C200C200C2008&param1=ZmRwLjFfMjA4NDg2MDNORQ==&unique=1678106327&session=60679ec97dfd8e96885c0cbe0e61b143&hostname=139.28.41.7	0	0.75	1.29904	173.205	0	0	0	0	0	0	0	0.333333	none	0	5
1,3-Dimethylurea	96-31-1	organic	solid, DES component	88.11	Thermo Fisher	2020-02-14	https://sds.chemicalsafety.com/sds/pda/msds/getpdf.ashx?action=msdsdocument&auth=200C200C200C200C2008207A200D2078200C200C200C200C200C200C200C200C200C2008&param1=ZmRwLjFfNDQwNTAzMTNORQ==&unique=1678106422&session=60679ec97dfd8e96885c0cbe0e61b143&hostname=139.28.41.7	0				0	0	0	0	0	0	0		none	0
1,3-Dimethylurea	96-31-1	organic	solid, DES component	88.11	Combi-Blocks	2023-01-02	https://sds.chemicalsafety.com/sds/pda/msds/getpdf.ashx?action=msdsdocument&auth=200C200C200C200C2008207A200D2078200C200C200C200C200C200C200C200C200C2008&param1=ZmRwLjFfMDU1NTUxMTNORQ==&unique=1678106473&session=60679ec97dfd8e96885c0cbe0e61b143&hostname=139.28.41.7	2.25				4	0	2	1	1	0	1		warning	15
1,1-Dimethylurea	598-94-7	organic	solid, DES component	88.11	Sigma-Aldrich	2022-04-04	https://sds.chemicalsafety.com/sds/pda/msds/getpdf.ashx?action=msdsdocument&auth=200C200C200C200C2008207A200D2078200C200C200C200C200C200C200C200C200C2008&param1=ZmRwLjFfNTA0NTM2MDNORQ==&unique=1678106640&session=60679ec97dfd8e96885c0cbe0e61b143&hostname=139.28.41.7	0	0.666667	1.1547	173.205	0	0	0	0	0	0	0	0.333333	none	0	4.33333
1,1-Dimethylurea	598-94-7	organic	solid, DES component	88.11	Thermo Fisher	2020-02-14	https://sds.chemicalsafety.com/sds/pda/msds/getpdf.ashx?action=msdsdocument&auth=200C200C200C200C2008207A200D2078200C200C200C200C200C200C200C200C200C2008&param1=ZmRwLjFfODQwNTAzMTNORQ==&unique=1678106698&session=60679ec97dfd8e96885c0cbe0e61b143&hostname=139.28.41.7	0				0	0	0	0	0	0	0		none	0
1,1-Dimethylurea	598-94-7	organic	solid, DES component	88.11	Combi-Blocks	2023-01-02	https://sds.chemicalsafety.com/sds/pda/msds/getpdf.ashx?action=msdsdocument&auth=200C200C200C200C2008207A200D2078200C200C200C200C200C200C200C200C200C2008&param1=ZmRwLjFfNTkxMTMxMTNORQ==&unique=1678106730&session=60679ec97dfd8e96885c0cbe0e61b143&hostname=139.28.41.7	2				3	0	2	1	0	0	1		warning	13
Malonic acid	141-82-2	organic	solid, DES component	104.06	Sigma-Aldrich	2021-11-26	https://sds.chemicalsafety.com/sds/pda/msds/getpdf.ashx?action=msdsdocument&auth=200C200C200C200C2008207A200D2078200C200C200C200C200C200C200C200C200C2008&param1=ZmRwLjFfNDM4OTE2MDNORQ==&unique=1678108416&session=60679ec97dfd8e96885c0cbe0e61b143&hostname=139.28.41.7	1	1	0	0	1	1	0	0	0	0	1	1	danger	2	3.66667
Malonic acid	141-82-2	organic	solid, DES component	104.06	Thermo Fisher	2022-02-11	https://sds.chemicalsafety.com/sds/pda/msds/getpdf.ashx?action=msdsdocument&auth=200C200C200C200C2008207A200D2078200C200C200C200C200C200C200C200C200C2008&param1=ZmRwLjFfMzAzMzAzMTNORQ==&unique=1678108489&session=60679ec97dfd8e96885c0cbe0e61b143&hostname=139.28.41.7	1				1	1	0	0	0	0	1		danger	3
Malonic acid	141-82-2	organic	solid, DES component	104.06	AppliChem GmbH	2020-03-18	https://sds.chemicalsafety.com/sds/pda/msds/getpdf.ashx?action=msdsdocument&auth=200C200C200C200C2008207A200D2078200C200C200C200C200C200C200C200C200C2008&param1=ZmRwLjFfODY5Nzg1MDNORQ==&unique=1678108541&session=60679ec97dfd8e96885c0cbe0e61b143&hostname=139.28.41.7	1				2	0	1	0	1	0	1		warning	6
3-Phenylpropionic acid	501-52-0	organic	solid, DES component	150.17	Sigma-Aldrich	2022-03-25	https://sds.chemicalsafety.com/sds/pda/msds/getpdf.ashx?action=msdsdocument&auth=200C200C200C200C2008207A200D2078200C200C200C200C200C200C200C200C200C2008&param1=ZmRwLjFfOTUwNTgxMjNORQ==&unique=1678109089&session=60679ec97dfd8e96885c0cbe0e61b143&hostname=139.28.41.7	0	0.666667	1.1547	173.205	0	0	0	0	0	0	0	0.333333	none	0	4.33333
3-Phenylpropionic acid	501-52-0	organic	solid, DES component	150.17	Thermo Fisher	2020-02-14	https://sds.chemicalsafety.com/sds/pda/msds/getpdf.ashx?action=msdsdocument&auth=200C200C200C200C2008207A200D2078200C200C200C200C200C200C200C200C200C2008&param1=ZmRwLjFfMTQxMzkyMTNORQ==&unique=1678109181&session=60679ec97dfd8e96885c0cbe0e61b143&hostname=139.28.41.7	0				0	0	0	0	0	0	0		none	0
3-Phenylpropionic acid	501-52-0	organic	solid, DES component	150.17	Combi-Blocks	2023-01-02	https://sds.chemicalsafety.com/sds/pda/msds/getpdf.ashx?action=msdsdocument&auth=200C200C200C200C2008207A200D2078200C200C200C200C200C200C200C200C200C2008&param1=ZmRwLjFfMDMxMTIwMTNORQ==&unique=1678109208&session=60679ec97dfd8e96885c0cbe0e61b143&hostname=139.28.41.7	2				3	0	2	1	0	0	1		warning	13
Tricarballylic acid	99-14-9	organic	solid, DES component	176.12	Sigma-Aldrich	2023-01-03	https://sds.chemicalsafety.com/sds/pda/msds/getpdf.ashx?action=msdsdocument&auth=200C200C200C200C2008207A200D2078200C200C200C200C200C200C200C200C200C2008&param1=ZmRwLjFfMDcxMDcwMDNORQ==&unique=1678109679&session=60679ec97dfd8e96885c0cbe0e61b143&hostname=139.28.41.7	0	1.66667	1.52753	91.6515	0	0	0	0	0	0	0	0.666667	none	0	9
Tricarballylic acid	99-14-9	organic	solid, DES component	176.12	Thermo Fisher	2020-02-14	https://sds.chemicalsafety.com/sds/pda/msds/getpdf.ashx?action=msdsdocument&auth=200C200C200C200C2008207A200D2078200C200C200C200C200C200C200C200C200C2008&param1=ZmRwLjFfNjA3ODAzMTNORQ==&unique=1678109732&session=60679ec97dfd8e96885c0cbe0e61b143&hostname=139.28.41.7	3				4	1	2	1	0	0	1		warning	14
Tricarballylic acid	99-14-9	organic	solid, DES component	176.12	Combi-Blocks	2023-01-02	https://sds.chemicalsafety.com/sds/pda/msds/getpdf.ashx?action=msdsdocument&auth=200C200C200C200C2008207A200D2078200C200C200C200C200C200C200C200C200C2008&param1=ZmRwLjFfOTg4OTMxMTNORQ==&unique=1678109776&session=60679ec97dfd8e96885c0cbe0e61b143&hostname=139.28.41.7	2				3	0	2	1	0	0	1		warning	13
2,2,2-Trifluoroacetamide	354-38-1	organic	solid, DES component	113.04	Sigma-Aldrich	2021-11-04	https://sds.chemicalsafety.com/sds/pda/msds/getpdf.ashx?action=msdsdocument&auth=200C200C200C200C2008207A200D2078200C200C200C200C200C200C200C200C200C2008&param1=ZmRwLjFfNjEzMDcwMDNORQ==&unique=1678109937&session=60679ec97dfd8e96885c0cbe0e61b143&hostname=139.28.41.7	2.25	2.41667	0.520416	21.5345	4	0	2	1	1	0	1	1	warning	15	14
2,2,2-Trifluoroacetamide	354-38-1	organic	solid, DES component	113.04	Thermo Fisher	2020-02-14	https://sds.chemicalsafety.com/sds/pda/msds/getpdf.ashx?action=msdsdocument&auth=200C200C200C200C2008207A200D2078200C200C200C200C200C200C200C200C200C2008&param1=ZmRwLjFfNDQxMjEzMTNORQ==&unique=1678110020&session=60679ec97dfd8e96885c0cbe0e61b143&hostname=139.28.41.7	3				4	1	2	1	0	0	1		warning	14
2,2,2-Trifluoroacetamide	354-38-1	organic	solid, DES component	113.04	Combi-Blocks	2023-01-02	https://sds.chemicalsafety.com/sds/pda/msds/getpdf.ashx?action=msdsdocument&auth=200C200C200C200C2008207A200D2078200C200C200C200C200C200C200C200C200C2008&param1=ZmRwLjFfNTYxNzUxMTNORQ==&unique=1678110067&session=60679ec97dfd8e96885c0cbe0e61b143&hostname=139.28.41.7	2				3	0	2	1	0	0	1		warning	13
1,6-Hexanediol	629-11-8	organic	solid, DES component	118.18	Sigma-Aldrich	2022-03-24	https://sds.chemicalsafety.com/sds/pda/msds/getpdf.ashx?action=msdsdocument&auth=200C200C200C200C2008207A200D2078200C200C200C200C200C200C200C200C200C2008&param1=ZmRwLjFfNTYxMzkxMjNORQ==&unique=1678110219&session=60679ec97dfd8e96885c0cbe0e61b143&hostname=139.28.41.7	0	0.75	1.29904	173.205	0	0	0	0	0	0	0	0.333333	none	0	5.33333
1,6-Hexanediol	629-11-8	organic	solid, DES component	118.18	Thermo Fisher	2020-02-14	https://sds.chemicalsafety.com/sds/pda/msds/getpdf.ashx?action=msdsdocument&auth=200C200C200C200C2008207A200D2078200C200C200C200C200C200C200C200C200C2008&param1=ZmRwLjFfNTc1MDEzMTNORQ==&unique=1678110281&session=60679ec97dfd8e96885c0cbe0e61b143&hostname=139.28.41.7	0				0	0	0	0	0	0	0		warning	1
1,6-Hexanediol	629-11-8	organic	solid, DES component	118.18	Combi-Blocks	2023-01-02	https://sds.chemicalsafety.com/sds/pda/msds/getpdf.ashx?action=msdsdocument&auth=200C200C200C200C2008207A200D2078200C200C200C200C200C200C200C200C200C2008&param1=ZmRwLjFfMDA5NzUxMTNORQ==&unique=1678110343&session=60679ec97dfd8e96885c0cbe0e61b143&hostname=139.28.41.7	2.25				4	0	2	1	1	0	1		warning	15
1,2-Hexanediol	6920-22-5	organic	liquid, DES component	118.17	Sigma-Aldrich	2022-11-15	https://sds.chemicalsafety.com/sds/pda/msds/getpdf.ashx?action=msdsdocument&auth=200C200C200C200C2008207A200D2078200C200C200C200C200C200C200C200C200C2008&param1=ZmRwLjFfODE1MDQ2MDNORQ==&unique=1678110423&session=60679ec97dfd8e96885c0cbe0e61b143&hostname=139.28.41.7	0.75	0.75	0	0	1	0	1	0	0	0	1	1	warning	4	4
1,2-Hexanediol	6920-22-5	organic	liquid, DES component	118.17	Thermo Fisher	2020-02-14	https://sds.chemicalsafety.com/sds/pda/msds/getpdf.ashx?action=msdsdocument&auth=200C200C200C200C2008207A200D2078200C200C200C200C200C200C200C200C200C2008&param1=ZmRwLjFfNTEzMDEzMTNORQ==&unique=1678110506&session=60679ec97dfd8e96885c0cbe0e61b143&hostname=139.28.41.7	0.75				1	0	1	0	0	0	1		warning	4
1,2-Hexanediol	6920-22-5	organic	liquid, DES component	118.17	Combi-Blocks	2023-01-02	https://sds.chemicalsafety.com/sds/pda/msds/getpdf.ashx?action=msdsdocument&auth=200C200C200C200C2008207A200D2078200C200C200C200C200C200C200C200C200C2008&param1=ZmRwLjFfNzI2NTYxMTNORQ==&unique=1678110547&session=60679ec97dfd8e96885c0cbe0e61b143&hostname=139.28.41.7	0.75				1	0	1	0	0	0	1		warning	4
Thiourea	62-56-6	organic	solid, DES component	76.12	Sigma-Aldrich	2021-07-29	https://sds.chemicalsafety.com/sds/pda/msds/getpdf.ashx?action=msdsdocument&auth=200C200C200C200C2008207A200D2078200C200C200C200C200C200C200C200C200C2008&param1=ZmRwLjFfMDk2OTYwMDNORQ==&unique=1678110635&session=60679ec97dfd8e96885c0cbe0e61b143&hostname=139.28.41.7	3.25	2.33333	0.803638	34.4416	5	0	4	0	1	0	3	2.66667	warning	11	11
Thiourea	62-56-6	organic	solid, DES component	76.12	Thermo Fisher	2020-02-14	https://sds.chemicalsafety.com/sds/pda/msds/getpdf.ashx?action=msdsdocument&auth=200C200C200C200C2008207A200D2078200C200C200C200C200C200C200C200C200C2008&param1=ZmRwLjFfNzg2NjAzMTNORQ==&unique=1678110720&session=60679ec97dfd8e96885c0cbe0e61b143&hostname=139.28.41.7	2				3	1	1	0	1	0	2		danger	11
Thiourea	62-56-6	organic	solid, DES component	76.12	Combi-Blocks	2023-01-02	https://sds.chemicalsafety.com/sds/pda/msds/getpdf.ashx?action=msdsdocument&auth=200C200C200C200C2008207A200D2078200C200C200C200C200C200C200C200C200C2008&param1=ZmRwLjFfMTU5MzUxMTNORQ==&unique=1678110775&session=60679ec97dfd8e96885c0cbe0e61b143&hostname=139.28.41.7	1.75				3	0	2	0	1	0	3		warning	11
Copper(I) chloride	7758-89-6	inorganic	solid, DES component	99.00	Sigma-Aldrich	2022-01-28	https://sds.chemicalsafety.com/sds/pda/msds/getpdf.ashx?action=msdsdocument&auth=200C200C200C200C2008207A200D2078200C200C200C200C200C200C200C200C200C2008&param1=ZmRwLjFfNTAyMzk2MDNORQ==&unique=1678136901&session=60679ec97dfd8e96885c0cbe0e61b143&hostname=139.28.41.7	4	3.33333	0.57735	17.3205	5	3	1	0	1	0	3	3	danger	11	11
Copper(I) chloride	7758-89-6	inorganic	solid, DES component	99.00	TCI America	2022-05-02	https://sds.chemicalsafety.com/sds/pda/msds/getpdf.ashx?action=msdsdocument&auth=200C200C200C200C2008207A200D2078200C200C200C200C200C200C200C200C200C2008&param1=ZmRwLjFfNDE1NzA1MjNORQ==&unique=1678136985&session=60679ec97dfd8e96885c0cbe0e61b143&hostname=139.28.41.7	3				4	2	1	0	1	0	3		warning
Copper(I) chloride	7758-89-6	inorganic	solid, DES component	99.00	Combi-Blocks	2023-01-02	https://sds.chemicalsafety.com/sds/pda/msds/getpdf.ashx?action=msdsdocument&auth=200C200C200C200C2008207A200D2078200C200C200C200C200C200C200C200C200C2008&param1=ZmRwLjFfOTc0NzUxMTNORQ==&unique=1678137048&session=60679ec97dfd8e96885c0cbe0e61b143&hostname=139.28.41.7	3				4	2	1	0	1	0	3		danger	11
Lithium chloride	7447-41-8	inorganic	solid, DES component	42.39	Sigma-Aldrich	2021-11-11	https://sds.chemicalsafety.com/sds/pda/msds/getpdf.ashx?action=msdsdocument&auth=200C200C200C200C2008207A200D2078200C200C200C200C200C200C200C200C200C2008&param1=ZmRwLjFfNzMzNDgxMjNORQ==&unique=1678137159&session=60679ec97dfd8e96885c0cbe0e61b143&hostname=139.28.41.7	1.75	1.91667	0.288675	15.0613	3	0	2	0	1	0	1	1	warning	10	14
Lithium chloride	7447-41-8	inorganic	solid, DES component	42.39	Thermo Fisher	2020-02-14	https://sds.chemicalsafety.com/sds/pda/msds/getpdf.ashx?action=msdsdocument&auth=200C200C200C200C2008207A200D2078200C200C200C200C200C200C200C200C200C2008&param1=ZmRwLjFfNjE0MjAzMTNORQ==&unique=1678137270&session=60679ec97dfd8e96885c0cbe0e61b143&hostname=139.28.41.7	1.75				3	0	2	0	1	0	1		warning	17
Lithium chloride	7447-41-8	inorganic	solid, DES component	42.39	Combi-Blocks	2023-01-02	https://sds.chemicalsafety.com/sds/pda/msds/getpdf.ashx?action=msdsdocument&auth=200C200C200C200C2008207A200D2078200C200C200C200C200C200C200C200C200C2008&param1=ZmRwLjFfNjQyNzUxMTNORQ==&unique=1678137337&session=60679ec97dfd8e96885c0cbe0e61b143&hostname=139.28.41.7	2.25				4	0	2	1	1	0	1		warning	15
Tin(II) chloride	7772-99-8	inorganic	solid, DES component	189.62	Sigma-Aldrich	2022-08-24	https://sds.chemicalsafety.com/sds/pda/msds/getpdf.ashx?action=msdsdocument&auth=200C200C200C200C2008207A200D2078200C200C200C200C200C200C200C200C200C2008&param1=ZmRwLjFfNTkyNjc2MDNORQ==&unique=1678137819&session=60679ec97dfd8e96885c0cbe0e61b143&hostname=139.28.41.7	7.75	7.16667	1.01036	14.0981	10	6	1	1	2	0	4	3.66667	danger	22	21.6667
Tin(II) chloride	7772-99-8	inorganic	solid, DES component	189.62	Thermo Fisher	2020-02-14	https://sds.chemicalsafety.com/sds/pda/msds/getpdf.ashx?action=msdsdocument&auth=200C200C200C200C2008207A200D2078200C200C200C200C200C200C200C200C200C2008&param1=ZmRwLjFfNTAzODAzMTNORQ==&unique=1678137943&session=60679ec97dfd8e96885c0cbe0e61b143&hostname=139.28.41.7	7.75				10	6	1	1	2	0	3		danger	21
Tin(II) chloride	7772-99-8	inorganic	solid, DES component	189.62	Combi-Blocks	2023-01-02	https://sds.chemicalsafety.com/sds/pda/msds/getpdf.ashx?action=msdsdocument&auth=200C200C200C200C2008207A200D2078200C200C200C200C200C200C200C200C200C2008&param1=ZmRwLjFfMTkxNjUxMTNORQ==&unique=1678137938&session=60679ec97dfd8e96885c0cbe0e61b143&hostname=139.28.41.7	6				8	3	3	1	1	0	4		danger	22
Lanthanum(III) chloride	10099-58-8	inorganic	solid, DES component	245.26	Sigma-Aldrich	2021-02-25	https://sds.chemicalsafety.com/sds/pda/msds/getpdf.ashx?action=msdsdocument&auth=200C200C200C200C2008207A200D2078200C200C200C200C200C200C200C200C200C2008&param1=ZmRwLjJfNjU2MDg2MDNORQ==&unique=1678138376&session=60679ec97dfd8e96885c0cbe0e61b143&hostname=139.28.41.7	4.5	4.25	0.433013	10.1885	5	3	2	0	0	0	3	3	danger	15	13.5
Lanthanum(III) chloride	10099-58-8	inorganic	solid, DES component	245.26	Combi-Blocks	2023-01-02	https://sds.chemicalsafety.com/sds/pda/msds/getpdf.ashx?action=msdsdocument&auth=200C200C200C200C2008207A200D2078200C200C200C200C200C200C200C200C200C2008&param1=ZmRwLjFfNjIxMTYxMTNORQ==&unique=1678138503&session=60679ec97dfd8e96885c0cbe0e61b143&hostname=139.28.41.7	3.75				4	3	1	0	0	0	3		danger	12
Lanthanum(III) chloride	10099-58-8	inorganic	solid, DES component	245.26	TCI America	2022-10-21	https://sds.chemicalsafety.com/sds/pda/msds/getpdf.ashx?action=msdsdocument&auth=200C200C200C200C2008207A200D2078200C200C200C200C200C200C200C200C200C2008&param1=ZmRwLjFfMjgyODA1MjNORQ==&unique=1678138548&session=60679ec97dfd8e96885c0cbe0e61b143&hostname=139.28.41.7	4.5				5	3	2	0	0	0	3		danger
Sodium trifluoromethanesulfonate	2926-30-9	organic	solid, DES component	172.06	Sigma-Aldrich	2020-12-18	https://sds.chemicalsafety.com/sds/pda/msds/getpdf.ashx?action=msdsdocument&auth=200C200C200C200C2008207A200D2078200C200C200C200C200C200C200C200C200C2008&param1=ZmRwLjFfNjM4NDc2MDNORQ==&unique=1678139147&session=60679ec97dfd8e96885c0cbe0e61b143&hostname=139.28.41.7	2	2.33333	0.57735	24.7436	3	0	2	1	0	0	1	1	warning	13	13.3333
Sodium trifluoromethanesulfonate	2926-30-9	organic	solid, DES component	172.06	Thermo Fisher	2020-02-14	https://sds.chemicalsafety.com/sds/pda/msds/getpdf.ashx?action=msdsdocument&auth=200C200C200C200C2008207A200D2078200C200C200C200C200C200C200C200C200C2008&param1=ZmRwLjFfOTc1NjAzMTNORQ==&unique=1678139233&session=60679ec97dfd8e96885c0cbe0e61b143&hostname=139.28.41.7	3				4	1	2	1	0	0	1		warning	14
Sodium trifluoromethanesulfonate	2926-30-9	organic	solid, DES component	172.06	Combi-Blocks	2023-01-02	https://sds.chemicalsafety.com/sds/pda/msds/getpdf.ashx?action=msdsdocument&auth=200C200C200C200C2008207A200D2078200C200C200C200C200C200C200C200C200C2008&param1=ZmRwLjFfNjMxMzYxMTNORQ==&unique=1678139278&session=60679ec97dfd8e96885c0cbe0e61b143&hostname=139.28.41.7	2				3	0	2	1	0	0	1		warning	13
Bis(trifluoromethane)sulfonimide lithium salt	90076-65-6	organic	solid, DES component	287.09	Sigma-Aldrich	2022-09-06	https://sds.chemicalsafety.com/sds/pda/msds/getpdf.ashx?action=msdsdocument&auth=200C200C200C200C2008207A200D2078200C200C200C200C200C200C200C200C200C2008&param1=ZmRwLjFfMDQyNjg2MDNORQ==&unique=1678139608&session=60679ec97dfd8e96885c0cbe0e61b143&hostname=139.28.41.7	4.75	4.75	1.5	31.5789	7	2	1	4	0	0	3	3	danger	14	14.3333
Bis(trifluoromethane)sulfonimide lithium salt	90076-65-6	organic	solid, DES component	287.09	Thermo Fisher	2020-02-14	https://sds.chemicalsafety.com/sds/pda/msds/getpdf.ashx?action=msdsdocument&auth=200C200C200C200C2008207A200D2078200C200C200C200C200C200C200C200C200C2008&param1=ZmRwLjFfNjU5NTAzMTNORQ==&unique=1678139709&session=60679ec97dfd8e96885c0cbe0e61b143&hostname=139.28.41.7	6.25				8	4	1	3	0	0	3		danger	15
Bis(trifluoromethane)sulfonimide lithium salt	90076-65-6	organic	solid, DES component	287.09	Combi-Blocks	2023-01-02	https://sds.chemicalsafety.com/sds/pda/msds/getpdf.ashx?action=msdsdocument&auth=200C200C200C200C2008207A200D2078200C200C200C200C200C200C200C200C200C2008&param1=ZmRwLjFfODgyNTYxMTNORQ==&unique=1678139771&session=60679ec97dfd8e96885c0cbe0e61b143&hostname=139.28.41.7	3.25				5	1	1	3	0	0	3		danger	14
1-Heptanol	111-70-6	organic	liquid	116.20	Sigma-Aldrich	2022-02-28	https://sds.chemicalsafety.com/sds/pda/msds/getpdf.ashx?action=msdsdocument&auth=200C200C200C200C2008207A200D2078200C200C200C200C200C200C200C200C200C2008&param1=ZmRwLjFfOTU2NzgxMjNORQ==&unique=1678218604&session=ffe609ad4d87d36f4049e78c6027dbfe&hostname=139.28.41.7	1.5	1.08333	0.381881	35.2506	3	0	1	1	1	0	1	1	warning	9	7
1-Heptanol	111-70-6	organic	liquid	116.20	Thermo Fisher	2021-07-23	https://sds.chemicalsafety.com/sds/pda/msds/getpdf.ashx?action=msdsdocument&auth=200C200C200C200C2008207A200D2078200C200C200C200C200C200C200C200C200C2008&param1=ZmRwLjFfMjU3MTEzMTNORQ==&unique=1678218706&session=ffe609ad4d87d36f4049e78c6027dbfe&hostname=139.28.41.7	1				2	0	1	0	1	0	1		warning	8
1-Heptanol	111-70-6	organic	liquid	116.20	Combi-Blocks	2023-01-02	https://sds.chemicalsafety.com/sds/pda/msds/getpdf.ashx?action=msdsdocument&auth=200C200C200C200C2008207A200D2078200C200C200C200C200C200C200C200C200C2008&param1=ZmRwLjFfNjQwMTYxMTNORQ==&unique=1678218756&session=ffe609ad4d87d36f4049e78c6027dbfe&hostname=139.28.41.7	0.75				1	0	1	0	0	0	1		warning	4
1-Octanol	111-87-5	organic	liquid	130.23	Sigma-Aldrich	2022-11-08	https://sds.chemicalsafety.com/sds/pda/msds/getpdf.ashx?action=msdsdocument&auth=200C200C200C200C2008207A200D2078200C200C200C200C200C200C200C200C200C2008&param1=ZmRwLjFfMzc2NzE0MDNORQ==&unique=1678218883&session=ffe609ad4d87d36f4049e78c6027dbfe&hostname=139.28.41.7	2	1.41667	0.520416	36.7353	4	0	1	2	1	0	1	1	warning	9	7.66667
1-Octanol	111-87-5	organic	liquid	130.23	Thermo Fisher	2021-07-23	https://sds.chemicalsafety.com/sds/pda/msds/getpdf.ashx?action=msdsdocument&auth=200C200C200C200C2008207A200D2078200C200C200C200C200C200C200C200C200C2008&param1=ZmRwLjFfMDE1MTEzMTNORQ==&unique=1678218986&session=ffe609ad4d87d36f4049e78c6027dbfe&hostname=139.28.41.7	1				2	0	1	0	1	0	1		warning	8
1-Octanol	111-87-5	organic	liquid	130.23	Combi-Blocks	2023-01-02	https://sds.chemicalsafety.com/sds/pda/msds/getpdf.ashx?action=msdsdocument&auth=200C200C200C200C2008207A200D2078200C200C200C200C200C200C200C200C200C2008&param1=ZmRwLjFfMjg3NTUxMTNORQ==&unique=1678219040&session=ffe609ad4d87d36f4049e78c6027dbfe&hostname=139.28.41.7	1.25				2	0	1	1	0	0	1		warning	6
1-Nonanol	143-08-8	organic	liquid	144.25	Sigma-Aldrich	2022-11-15	https://sds.chemicalsafety.com/sds/pda/msds/getpdf.ashx?action=msdsdocument&auth=200C200C200C200C2008207A200D2078200C200C200C200C200C200C200C200C200C2008&param1=ZmRwLjFfODYxNzkwMDNORQ==&unique=1678219146&session=ffe609ad4d87d36f4049e78c6027dbfe&hostname=139.28.41.7	1.75	1.25	0.5	40	3	0	1	2	0	0	1	1	warning	6	5.33333
1-Nonanol	143-08-8	organic	liquid	144.25	Thermo Fisher	2020-07-31	https://sds.chemicalsafety.com/sds/pda/msds/getpdf.ashx?action=msdsdocument&auth=200C200C200C200C2008207A200D2078200C200C200C200C200C200C200C200C200C2008&param1=ZmRwLjFfMzc4MTEzMTNORQ==&unique=1678219224&session=ffe609ad4d87d36f4049e78c6027dbfe&hostname=139.28.41.7	0.75				1	0	1	0	0	0	1		warning	4
1-Nonanol	143-08-8	organic	liquid	144.25	Combi-Blocks	2023-01-02	https://sds.chemicalsafety.com/sds/pda/msds/getpdf.ashx?action=msdsdocument&auth=200C200C200C200C2008207A200D2078200C200C200C200C200C200C200C200C200C2008&param1=ZmRwLjFfMjA0MjYxMTNORQ==&unique=1678219270&session=ffe609ad4d87d36f4049e78c6027dbfe&hostname=139.28.41.7	1.25				2	0	1	1	0	0	1		warning	6
tert-Butyl methyl ether	1634-04-4	organic	liquid	88.15	Sigma-Aldrich	2022-11-14	https://sds.chemicalsafety.com/sds/pda/msds/getpdf.ashx?action=msdsdocument&auth=200C200C200C200C2008207A200D2078200C200C200C200C200C200C200C200C200C2008&param1=ZmRwLjFfODU2NjgwMDNORQ==&unique=1678219684&session=ffe609ad4d87d36f4049e78c6027dbfe&hostname=139.28.41.7	1.5	2	0.866025	43.3013	2	0	2	0	0	0	2	2	danger	14	14
tert-Butyl methyl ether	1634-04-4	organic	liquid	88.15	Thermo Fisher	2020-02-14	https://sds.chemicalsafety.com/sds/pda/msds/getpdf.ashx?action=msdsdocument&auth=200C200C200C200C2008207A200D2078200C200C200C200C200C200C200C200C200C2008&param1=ZmRwLjFfNDQzOTAzMTNORQ==&unique=1678219757&session=ffe609ad4d87d36f4049e78c6027dbfe&hostname=139.28.41.7	3				4	1	2	1	0	0	2		danger	23
tert-Butyl methyl ether	1634-04-4	organic	liquid	88.15	PANREAC QUIMICA S.L.U.	2020-07-14	https://sds.chemicalsafety.com/sds/pda/msds/getpdf.ashx?action=msdsdocument&auth=200C200C200C200C2008207A200D2078200C200C200C200C200C200C200C200C200C2008&param1=ZmRwLjFfNDUwODg1MDNORQ==&unique=1678219827&session=ffe609ad4d87d36f4049e78c6027dbfe&hostname=139.28.41.7	1.5				2	0	2	0	0	0	2		danger	5
Tetrahydrofuran	109-99-9	organic	liquid	72.11	Sigma-Aldrich	2022-12-08	https://sds.chemicalsafety.com/sds/pda/msds/getpdf.ashx?action=msdsdocument&auth=200C200C200C200C2008207A200D2078200C200C200C200C200C200C200C200C200C2008&param1=ZmRwLjRfNTU2NDE0MDNORQ==&unique=1678219940&session=ffe609ad4d87d36f4049e78c6027dbfe&hostname=139.28.41.7	3	3.33333	0.57735	17.3205	5	0	3	1	1	0	3	3	danger	24	18.6667
Tetrahydrofuran	109-99-9	organic	liquid	72.11	Thermo Fisher	2022-02-23	https://sds.chemicalsafety.com/sds/pda/msds/getpdf.ashx?action=msdsdocument&auth=200C200C200C200C2008207A200D2078200C200C200C200C200C200C200C200C200C2008&param1=ZmRwLjFfNjY5ODAzMTNORQ==&unique=1678220035&session=ffe609ad4d87d36f4049e78c6027dbfe&hostname=139.28.41.7	4				6	1	3	1	1	0	3		danger	26
Tetrahydrofuran	109-99-9	organic	liquid	72.11	PANREAC QUIMICA S.L.U.	2021-02-03	https://sds.chemicalsafety.com/sds/pda/msds/getpdf.ashx?action=msdsdocument&auth=200C200C200C200C2008207A200D2078200C200C200C200C200C200C200C200C200C2008&param1=ZmRwLjFfNjY2Njg1MDNORQ==&unique=1678220093&session=ffe609ad4d87d36f4049e78c6027dbfe&hostname=139.28.41.7	3				5	0	3	1	1	0	3		danger	6
Trichloroethylene	79-01-6	organic	liquid	131.39	Sigma-Aldrich	2022-09-06	https://sds.chemicalsafety.com/sds/pda/msds/getpdf.ashx?action=msdsdocument&auth=200C200C200C200C2008207A200D2078200C200C200C200C200C200C200C200C200C2008&param1=ZmRwLjFfNDQwNzgwMDNORQ==&unique=1678221371&session=ffe609ad4d87d36f4049e78c6027dbfe&hostname=139.28.41.7	5.75	5.83333	1.6266	27.8846	8	2	3	3	0	0	2	2	danger	18	18
Trichloroethylene	79-01-6	organic	liquid	131.39	Thermo Fisher	2020-02-14	https://sds.chemicalsafety.com/sds/pda/msds/getpdf.ashx?action=msdsdocument&auth=200C200C200C200C2008207A200D2078200C200C200C200C200C200C200C200C200C2008&param1=ZmRwLjFfNDUzODAzMTNORQ==&unique=1678221475&session=ffe609ad4d87d36f4049e78c6027dbfe&hostname=139.28.41.7	7.5				9	4	4	1	0	0	2		danger	18
Trichloroethylene	79-01-6	organic	liquid	131.39	Combi-Blocks	2023-01-02	https://sds.chemicalsafety.com/sds/pda/msds/getpdf.ashx?action=msdsdocument&auth=200C200C200C200C2008207A200D2078200C200C200C200C200C200C200C200C200C2008&param1=ZmRwLjFfNTA1NTYxMTNORQ==&unique=1678221549&session=ffe609ad4d87d36f4049e78c6027dbfe&hostname=139.28.41.7	4.25				6	1	3	2	0	0	2		danger	18
Tetrachloroethylene	127-18-4	organic	liquid	165.83	Sigma-Aldrich	2022-10-19	https://sds.chemicalsafety.com/sds/pda/msds/getpdf.ashx?action=msdsdocument&auth=200C200C200C200C2008207A200D2078200C200C200C200C200C200C200C200C200C2008&param1=ZmRwLjFfMDQ3NTE0MDNORQ==&unique=1678221656&session=ffe609ad4d87d36f4049e78c6027dbfe&hostname=139.28.41.7	5.25	4.5	2.70416	60.0925	7	1	5	1	0	0	3	2.33333	warning	19	14.3333
Tetrachloroethylene	127-18-4	organic	liquid	165.83	Thermo Fisher	2020-02-14	https://sds.chemicalsafety.com/sds/pda/msds/getpdf.ashx?action=msdsdocument&auth=200C200C200C200C2008207A200D2078200C200C200C200C200C200C200C200C200C2008&param1=ZmRwLjFfNTY1NzAzMTNORQ==&unique=1678221751&session=ffe609ad4d87d36f4049e78c6027dbfe&hostname=139.28.41.7	6.75				8	4	3	1	0	0	2		danger	18
Tetrachloroethylene	127-18-4	organic	liquid	165.83	PANREAC QUIMICA S.L.U.	2020-11-23	https://sds.chemicalsafety.com/sds/pda/msds/getpdf.ashx?action=msdsdocument&auth=200C200C200C200C2008207A200D2078200C200C200C200C200C200C200C200C200C2008&param1=ZmRwLjFfOTEwNzg1MDNORQ==&unique=1678221813&session=ffe609ad4d87d36f4049e78c6027dbfe&hostname=139.28.41.7	1.5				2	0	2	0	0	0	2		warning	6
1,1,2,2-Tetrachloroethane	79-34-5	organic	liquid	167.85	Sigma-Aldrich	2023-02-07	https://sds.chemicalsafety.com/sds/pda/msds/getpdf.ashx?action=msdsdocument&auth=200C200C200C200C2008207A200D2078200C200C200C200C200C200C200C200C200C2008&param1=ZmRwLjFfMTk0MjMwMDNORQ==&unique=1678222158&session=ffe609ad4d87d36f4049e78c6027dbfe&hostname=139.28.41.7	3.25	2.5	0.75	30	4	1	3	0	0	0	2	2	danger	15	15
1,1,2,2-Tetrachloroethane	79-34-5	organic	liquid	167.85	Thermo Fisher	2020-02-14	https://sds.chemicalsafety.com/sds/pda/msds/getpdf.ashx?action=msdsdocument&auth=200C200C200C200C2008207A200D2078200C200C200C200C200C200C200C200C200C2008&param1=ZmRwLjFfODUxMDEzMTNORQ==&unique=1678222237&session=ffe609ad4d87d36f4049e78c6027dbfe&hostname=139.28.41.7	2.5				3	1	2	0	0	0	2		danger	19
1,1,2,2-Tetrachloroethane	79-34-5	organic	liquid	167.85	Combi-Blocks	2023-01-02	https://sds.chemicalsafety.com/sds/pda/msds/getpdf.ashx?action=msdsdocument&auth=200C200C200C200C2008207A200D2078200C200C200C200C200C200C200C200C200C2008&param1=ZmRwLjFfMjEyNDUxMTNORQ==&unique=1678222288&session=ffe609ad4d87d36f4049e78c6027dbfe&hostname=139.28.41.7	1.75				3	0	1	2	0	0	2		danger	11
Cyclopentane	287-92-3	organic	liquid	70.13	Sigma-Aldrich	2022-07-23	https://sds.chemicalsafety.com/sds/pda/msds/getpdf.ashx?action=msdsdocument&auth=200C200C200C200C2008207A200D2078200C200C200C200C200C200C200C200C200C2008&param1=ZmRwLjFfNDkyNjMwMDNORQ==&unique=1678222440&session=ffe609ad4d87d36f4049e78c6027dbfe&hostname=139.28.41.7	1.75	2.08333	1.04083	49.96	3	0	1	2	0	0	1	1.66667	danger	12	14.3333
Cyclopentane	287-92-3	organic	liquid	70.13	Thermo Fisher	2021-03-11	https://sds.chemicalsafety.com/sds/pda/msds/getpdf.ashx?action=msdsdocument&auth=200C200C200C200C2008207A200D2078200C200C200C200C200C200C200C200C200C2008&param1=ZmRwLjFfOTM4MTAzMTNORQ==&unique=1678222535&session=ffe609ad4d87d36f4049e78c6027dbfe&hostname=139.28.41.7	3.25				4	2	1	1	0	0	3		danger	19
Cyclopentane	287-92-3	organic	liquid	70.13	Combi-Blocks	2023-01-02	https://sds.chemicalsafety.com/sds/pda/msds/getpdf.ashx?action=msdsdocument&auth=200C200C200C200C2008207A200D2078200C200C200C200C200C200C200C200C200C2008&param1=ZmRwLjFfMzA0MDYxMTNORQ==&unique=1678222587&session=ffe609ad4d87d36f4049e78c6027dbfe&hostname=139.28.41.7	1.25				2	0	1	1	0	0	1		danger	12
n-Nonane	111-84-2	organic	liquid	128.26	Sigma-Aldrich	2022-10-19	https://sds.chemicalsafety.com/sds/pda/msds/getpdf.ashx?action=msdsdocument&auth=200C200C200C200C2008207A200D2078200C200C200C200C200C200C200C200C200C2008&param1=ZmRwLjFfNDIwNTgwMDNORQ==&unique=1678222722&session=ffe609ad4d87d36f4049e78c6027dbfe&hostname=139.28.41.7	3.75	4	0.433013	10.8253	5	2	1	2	0	0	4	3.66667	danger	23	22.6667
n-Nonane	111-84-2	organic	liquid	128.26	Thermo Fisher	2020-02-14	https://sds.chemicalsafety.com/sds/pda/msds/getpdf.ashx?action=msdsdocument&auth=200C200C200C200C2008207A200D2078200C200C200C200C200C200C200C200C200C2008&param1=ZmRwLjFfNTA1NDAzMTNORQ==&unique=1678222831&session=ffe609ad4d87d36f4049e78c6027dbfe&hostname=139.28.41.7	4.5				6	2	2	2	0	0	3		danger	24
n-Nonane	111-84-2	organic	liquid	128.26	Combi-Blocks	2023-01-02	https://sds.chemicalsafety.com/sds/pda/msds/getpdf.ashx?action=msdsdocument&auth=200C200C200C200C2008207A200D2078200C200C200C200C200C200C200C200C200C2008&param1=ZmRwLjFfODc0MDYxMTNORQ==&unique=1678222884&session=ffe609ad4d87d36f4049e78c6027dbfe&hostname=139.28.41.7	3.75				5	2	1	2	0	0	4		warning	21
n-Decane	124-18-5	organic	liquid	142.28	Sigma-Aldrich	2022-10-19	https://sds.chemicalsafety.com/sds/pda/msds/getpdf.ashx?action=msdsdocument&auth=200C200C200C200C2008207A200D2078200C200C200C200C200C200C200C200C200C2008&param1=ZmRwLjFfMjI3NjM2MDNORQ==&unique=1678223031&session=ffe609ad4d87d36f4049e78c6027dbfe&hostname=139.28.41.7	1.5	1.5	0	0	2	1	0	1	0	0	2	2	danger	14	13.6667
n-Decane	124-18-5	organic	liquid	142.28	Thermo Fisher	2020-02-14	https://sds.chemicalsafety.com/sds/pda/msds/getpdf.ashx?action=msdsdocument&auth=200C200C200C200C2008207A200D2078200C200C200C200C200C200C200C200C200C2008&param1=ZmRwLjFfMjAzNDAzMTNORQ==&unique=1678223115&session=ffe609ad4d87d36f4049e78c6027dbfe&hostname=139.28.41.7	1.5				2	1	0	1	0	0	2		danger	14
n-Decane	124-18-5	organic	liquid	142.28	Combi-Blocks	2023-01-02	https://sds.chemicalsafety.com/sds/pda/msds/getpdf.ashx?action=msdsdocument&auth=200C200C200C200C2008207A200D2078200C200C200C200C200C200C200C200C200C2008&param1=ZmRwLjFfNjc4MjYxMTNORQ==&unique=1678223161&session=ffe609ad4d87d36f4049e78c6027dbfe&hostname=139.28.41.7	1.5				2	1	0	1	0	0	2		warning	13
n-Tridecane	629-50-5	organic	liquid	184.36	Sigma-Aldrich	2022-09-06	https://sds.chemicalsafety.com/sds/pda/msds/getpdf.ashx?action=msdsdocument&auth=200C200C200C200C2008207A200D2078200C200C200C200C200C200C200C200C200C2008&param1=ZmRwLjFfODEyMDcwMDNORQ==&unique=1678223446&session=ffe609ad4d87d36f4049e78c6027dbfe&hostname=139.28.41.7	1.25	1.16667	0.144338	12.3718	2	1	0	0	1	0	1	1	danger	5	5.33333
n-Tridecane	629-50-5	organic	liquid	184.36	Thermo Fisher	2021-07-23	https://sds.chemicalsafety.com/sds/pda/msds/getpdf.ashx?action=msdsdocument&auth=200C200C200C200C2008207A200D2078200C200C200C200C200C200C200C200C200C2008&param1=ZmRwLjFfOTQ4NzAzMTNORQ==&unique=1678223353&session=ffe609ad4d87d36f4049e78c6027dbfe&hostname=139.28.41.7	1.25				2	1	0	0	1	0	1		danger	8
n-Tridecane	629-50-5	organic	liquid	184.36	Combi-Blocks	2023-01-02	https://sds.chemicalsafety.com/sds/pda/msds/getpdf.ashx?action=msdsdocument&auth=200C200C200C200C2008207A200D2078200C200C200C200C200C200C200C200C200C2008&param1=ZmRwLjFfMzY0MjYxMTNORQ==&unique=1678223395&session=ffe609ad4d87d36f4049e78c6027dbfe&hostname=139.28.41.7	1				1	1	0	0	0	0	1		warning	3
n-Tetradecane	629-59-4	organic	liquid	198.39	Sigma-Aldrich	2021-04-29	https://sds.chemicalsafety.com/sds/pda/msds/getpdf.ashx?action=msdsdocument&auth=200C200C200C200C2008207A200D2078200C200C200C200C200C200C200C200C200C2008&param1=ZmRwLjFfMTI3NDgxMjNORQ==&unique=1678223541&session=ffe609ad4d87d36f4049e78c6027dbfe&hostname=139.28.41.7	1	1	0	0	1	1	0	0	0	0	1	1	danger	4	3.66667
n-Tetradecane	629-59-4	organic	liquid	198.39	Thermo Fisher	2020-02-14	https://sds.chemicalsafety.com/sds/pda/msds/getpdf.ashx?action=msdsdocument&auth=200C200C200C200C2008207A200D2078200C200C200C200C200C200C200C200C200C2008&param1=ZmRwLjFfMTE4NzAzMTNORQ==&unique=1678223616&session=ffe609ad4d87d36f4049e78c6027dbfe&hostname=139.28.41.7	1				1	1	0	0	0	0	1		danger	4
n-Tetradecane	629-59-4	organic	liquid	198.39	Combi-Blocks	2023-01-02	https://sds.chemicalsafety.com/sds/pda/msds/getpdf.ashx?action=msdsdocument&auth=200C200C200C200C2008207A200D2078200C200C200C200C200C200C200C200C200C2008&param1=ZmRwLjFfMjMxMzYxMTNORQ==&unique=1678223654&session=ffe609ad4d87d36f4049e78c6027dbfe&hostname=139.28.41.7	1				1	1	0	0	0	0	1		warning	3
n-Pentadecane	629-62-9	organic	liquid	212.41	Sigma-Aldrich	2021-04-29	https://sds.chemicalsafety.com/sds/pda/msds/getpdf.ashx?action=msdsdocument&auth=200C200C200C200C2008207A200D2078200C200C200C200C200C200C200C200C200C2008&param1=ZmRwLjFfMDcyNjgxMjNORQ==&unique=1678223767&session=ffe609ad4d87d36f4049e78c6027dbfe&hostname=139.28.41.7	1	1	0	0	1	1	0	0	0	0	1	1	danger	4	3.66667
n-Pentadecane	629-62-9	organic	liquid	212.41	Thermo Fisher	2020-02-14	https://sds.chemicalsafety.com/sds/pda/msds/getpdf.ashx?action=msdsdocument&auth=200C200C200C200C2008207A200D2078200C200C200C200C200C200C200C200C200C2008&param1=ZmRwLjFfNzAxODAzMTNORQ==&unique=1678223837&session=ffe609ad4d87d36f4049e78c6027dbfe&hostname=139.28.41.7	1				1	1	0	0	0	0	1		danger	4
n-Pentadecane	629-62-9	organic	liquid	212.41	Combi-Blocks	2023-01-02	https://sds.chemicalsafety.com/sds/pda/msds/getpdf.ashx?action=msdsdocument&auth=200C200C200C200C2008207A200D2078200C200C200C200C200C200C200C200C200C2008&param1=ZmRwLjFfNTY2OTUxMTNORQ==&unique=1678223873&session=ffe609ad4d87d36f4049e78c6027dbfe&hostname=139.28.41.7	1				1	1	0	0	0	0	1		warning	3
1-Heptene	592-76-7	organic	liquid	98.19	Sigma-Aldrich	2022-11-15	https://sds.chemicalsafety.com/sds/pda/msds/getpdf.ashx?action=msdsdocument&auth=200C200C200C200C2008207A200D2078200C200C200C200C200C200C200C200C200C2008&param1=ZmRwLjFfMzU0ODQ2MDNORQ==&unique=1678275206&session=16a6a8da7e51bf4b79e724bfec6661d4&hostname=139.28.41.7	1.75	2.91667	1.04083	35.6857	2	1	1	0	0	0	2	2.66667	danger	14	18
1-Heptene	592-76-7	organic	liquid	98.19	Thermo Fisher	2021-03-09	https://sds.chemicalsafety.com/sds/pda/msds/getpdf.ashx?action=msdsdocument&auth=200C200C200C200C2008207A200D2078200C200C200C200C200C200C200C200C200C2008&param1=ZmRwLjFfMTY4MTEzMTNORQ==&unique=1678275290&session=16a6a8da7e51bf4b79e724bfec6661d4&hostname=139.28.41.7	3.25				4	1	3	0	0	0	3		danger	19
1-Heptene	592-76-7	organic	liquid	98.19	Combi-Blocks	2023-01-02	https://sds.chemicalsafety.com/sds/pda/msds/getpdf.ashx?action=msdsdocument&auth=200C200C200C200C2008207A200D2078200C200C200C200C200C200C200C200C200C2008&param1=ZmRwLjFfNDA0OTMxMTNORQ==&unique=1678275339&session=16a6a8da7e51bf4b79e724bfec6661d4&hostname=139.28.41.7	3.75				5	1	3	1	0	0	3		danger	21
1-Octene	111-66-0	organic	liquid	112.21	Sigma-Aldrich	2021-09-23	https://sds.chemicalsafety.com/sds/pda/msds/getpdf.ashx?action=msdsdocument&auth=200C200C200C200C2008207A200D2078200C200C200C200C200C200C200C200C200C2008&param1=ZmRwLjFfMjc2MjMwMDNORQ==&unique=1678275434&session=16a6a8da7e51bf4b79e724bfec6661d4&hostname=139.28.41.7	3.75	2.75	1	36.3636	4	3	1	0	0	0	3	2.66667	danger	16	15
1-Octene	111-66-0	organic	liquid	112.21	Thermo Fisher	2020-02-14	https://sds.chemicalsafety.com/sds/pda/msds/getpdf.ashx?action=msdsdocument&auth=200C200C200C200C2008207A200D2078200C200C200C200C200C200C200C200C200C2008&param1=ZmRwLjFfNDU2MTEzMTNORQ==&unique=1678275556&session=16a6a8da7e51bf4b79e724bfec6661d4&hostname=139.28.41.7	1.75				2	1	1	0	0	0	2		danger	14
1-Octene	111-66-0	organic	liquid	112.21	Combi-Blocks	2023-01-02	https://sds.chemicalsafety.com/sds/pda/msds/getpdf.ashx?action=msdsdocument&auth=200C200C200C200C2008207A200D2078200C200C200C200C200C200C200C200C200C2008&param1=ZmRwLjFfNjYxNDYxMTNORQ==&unique=1678275602&session=16a6a8da7e51bf4b79e724bfec6661d4&hostname=139.28.41.7	2.75				3	2	1	0	0	0	3		danger	15
DL-1,2-Isopropylideneglycerol	100-79-8	organic	liquid	132.16	Sigma-Aldrich	2021-02-25	https://sds.chemicalsafety.com/sds/pda/msds/getpdf.ashx?action=msdsdocument&auth=200C200C200C200C2008207A200D2078200C200C200C200C200C200C200C200C200C2008&param1=ZmRwLjFfOTc2MTQ2MDNORQ==&unique=1678276653&session=16a6a8da7e51bf4b79e724bfec6661d4&hostname=139.28.41.7	1	0.75	0.433013	57.735	2	0	1	0	1	0	1	0.666667	warning	8	7
DL-1,2-Isopropylideneglycerol	100-79-8	organic	liquid	132.16	Thermo Fisher	2021-07-23	https://sds.chemicalsafety.com/sds/pda/msds/getpdf.ashx?action=msdsdocument&auth=200C200C200C200C2008207A200D2078200C200C200C200C200C200C200C200C200C2008&param1=ZmRwLjFfMzI2NjAzMTNORQ==&unique=1678276735&session=16a6a8da7e51bf4b79e724bfec6661d4&hostname=139.28.41.7	1				2	0	1	0	1	0	1		warning	8
DL-1,2-Isopropylideneglycerol	100-79-8	organic	liquid	132.16	Combi-Blocks	2023-01-02	https://sds.chemicalsafety.com/sds/pda/msds/getpdf.ashx?action=msdsdocument&auth=200C200C200C200C2008207A200D2078200C200C200C200C200C200C200C200C200C2008&param1=ZmRwLjFfMzA5NDUxMTNORQ==&unique=1678276795&session=16a6a8da7e51bf4b79e724bfec6661d4&hostname=139.28.41.7	0.25				1	0	0	0	1	0	0		none	5
Cyclopentyl methyl ether	5614-37-9	organic	liquid	100.16	Sigma-Aldrich	2022-12-08	https://sds.chemicalsafety.com/sds/pda/msds/getpdf.ashx?action=msdsdocument&auth=200C200C200C200C2008207A200D2078200C200C200C200C200C200C200C200C200C2008&param1=ZmRwLjFfNDE1NjI0MDNORQ==&unique=1678276961&session=16a6a8da7e51bf4b79e724bfec6661d4&hostname=139.28.41.7	3	2.66667	0.288675	10.8253	5	0	3	1	1	0	2	2	danger	19	18.6667
Cyclopentyl methyl ether	5614-37-9	organic	liquid	100.16	Thermo Fisher	2022-04-21	https://sds.chemicalsafety.com/sds/pda/msds/getpdf.ashx?action=msdsdocument&auth=200C200C200C200C2008207A200D2078200C200C200C200C200C200C200C200C200C2008&param1=ZmRwLjFfODE0OTkyMTNORQ==&unique=1678277056&session=16a6a8da7e51bf4b79e724bfec6661d4&hostname=139.28.41.7	2.5				4	0	3	0	1	0	2		danger	19
Cyclopentyl methyl ether	5614-37-9	organic	liquid	100.16	Combi-Blocks	2023-01-02	https://sds.chemicalsafety.com/sds/pda/msds/getpdf.ashx?action=msdsdocument&auth=200C200C200C200C2008207A200D2078200C200C200C200C200C200C200C200C200C2008&param1=ZmRwLjFfOTQ3MzYxMTNORQ==&unique=1678277125&session=16a6a8da7e51bf4b79e724bfec6661d4&hostname=139.28.41.7	2.5				4	0	3	0	1	0	2		danger	18
γ-Valerolactone	108-29-2	organic	liquid	100.12	Sigma-Aldrich	2022-07-28	https://sds.chemicalsafety.com/sds/pda/msds/getpdf.ashx?action=msdsdocument&auth=200C200C200C200C2008207A200D2078200C200C200C200C200C200C200C200C200C2008&param1=ZmRwLjFfNDc0MDQ2MDNORQ==&unique=1678277525&session=16a6a8da7e51bf4b79e724bfec6661d4&hostname=139.28.41.7	1.5	0.583333	0.803638	137.766	2	0	2	0	0	0	1	0.333333	warning	7	4
γ-Valerolactone	108-29-2	organic	liquid	100.12	Thermo Fisher	2020-02-14	https://sds.chemicalsafety.com/sds/pda/msds/getpdf.ashx?action=msdsdocument&auth=200C200C200C200C2008207A200D2078200C200C200C200C200C200C200C200C200C2008&param1=ZmRwLjFfMDEwMjAzMTNORQ==&unique=1678277601&session=16a6a8da7e51bf4b79e724bfec6661d4&hostname=139.28.41.7	0				0	0	0	0	0	0	0		none	0
γ-Valerolactone	108-29-2	organic	liquid	100.12	Combi-Blocks	2023-01-02	https://sds.chemicalsafety.com/sds/pda/msds/getpdf.ashx?action=msdsdocument&auth=200C200C200C200C2008207A200D2078200C200C200C200C200C200C200C200C200C2008&param1=ZmRwLjFfNTQ4MDYxMTNORQ==&unique=1678277637&session=16a6a8da7e51bf4b79e724bfec6661d4&hostname=139.28.41.7	0.25				1	0	0	0	1	0	0		none	5
1,8-Cineole	470-82-6	organic	liquid	154.25	Sigma-Aldrich	2021-09-19	https://sds.chemicalsafety.com/sds/pda/msds/getpdf.ashx?action=msdsdocument&auth=200C200C200C200C2008207A200D2078200C200C200C200C200C200C200C200C200C2008&param1=ZmRwLjFfNTk1MjMwMDNORQ==&unique=1678277760&session=16a6a8da7e51bf4b79e724bfec6661d4&hostname=139.28.41.7	2	1.33333	0.763763	57.2822	3	1	0	2	0	0	2	1.66667	warning	16	14
1,8-Cineole	470-82-6	organic	liquid	154.25	Thermo Fisher	2020-06-18	https://sds.chemicalsafety.com/sds/pda/msds/getpdf.ashx?action=msdsdocument&auth=200C200C200C200C2008207A200D2078200C200C200C200C200C200C200C200C200C2008&param1=ZmRwLjFfMzU4MDEzMTNORQ==&unique=1678277838&session=16a6a8da7e51bf4b79e724bfec6661d4&hostname=139.28.41.7	1.5				2	1	0	1	0	0	2		warning	15
1,8-Cineole	470-82-6	organic	liquid	154.25	Combi-Blocks	2023-01-02	https://sds.chemicalsafety.com/sds/pda/msds/getpdf.ashx?action=msdsdocument&auth=200C200C200C200C2008207A200D2078200C200C200C200C200C200C200C200C200C2008&param1=ZmRwLjFfMzgzNTYxMTNORQ==&unique=1678277917&session=16a6a8da7e51bf4b79e724bfec6661d4&hostname=139.28.41.7	0.5				1	0	0	1	0	0	1		warning	11
Neryl acetate	141-12-8	organic	liquid	196.29	Sigma-Aldrich	2022-03-10	https://sds.chemicalsafety.com/sds/pda/msds/getpdf.ashx?action=msdsdocument&auth=200C200C200C200C2008207A200D2078200C200C200C200C200C200C200C200C200C2008&param1=ZmRwLjFfNjk4NjgxMjNORQ==&unique=1678278196&session=16a6a8da7e51bf4b79e724bfec6661d4&hostname=139.28.41.7	0.75	0.25	0.433013	173.205	1	0	1	0	0	0	0	0	none	2	0.666667
Neryl acetate	141-12-8	organic	liquid	196.29	Thermo Fisher	2020-02-14	https://sds.chemicalsafety.com/sds/pda/msds/getpdf.ashx?action=msdsdocument&auth=200C200C200C200C2008207A200D2078200C200C200C200C200C200C200C200C200C2008&param1=ZmRwLjFfNzIxNTAzMTNORQ==&unique=1678278443&session=16a6a8da7e51bf4b79e724bfec6661d4&hostname=139.28.41.7	0				0	0	0	0	0	0	0		none	0
Neryl acetate	141-12-8	organic	liquid	196.29	Combi-Blocks	2023-01-02	https://sds.chemicalsafety.com/sds/pda/msds/getpdf.ashx?action=msdsdocument&auth=200C200C200C200C2008207A200D2078200C200C200C200C200C200C200C200C200C2008&param1=ZmRwLjFfMzQzOTUxMTNORQ==&unique=1678278474&session=16a6a8da7e51bf4b79e724bfec6661d4&hostname=139.28.41.7	0				0	0	0	0	0	0	0		none	0
Butyl levulinate	2052-15-5	organic	liquid	172.22	Sigma-Aldrich	2022-03-30	https://sds.chemicalsafety.com/sds/pda/msds/getpdf.ashx?action=msdsdocument&auth=200C200C200C200C2008207A200D2078200C200C200C200C200C200C200C200C200C2008&param1=ZmRwLjFfMDIzNzUwMDNORQ==&unique=1678278672&session=16a6a8da7e51bf4b79e724bfec6661d4&hostname=139.28.41.7	1.5	0.583333	0.803638	137.766	2	0	2	0	0	0	1	0.333333	warning	7	4
Butyl levulinate	2052-15-5	organic	liquid	172.22	Thermo Fisher	2020-02-14	https://sds.chemicalsafety.com/sds/pda/msds/getpdf.ashx?action=msdsdocument&auth=200C200C200C200C2008207A200D2078200C200C200C200C200C200C200C200C200C2008&param1=ZmRwLjFfODk3NDAzMTNORQ==&unique=1678278759&session=16a6a8da7e51bf4b79e724bfec6661d4&hostname=139.28.41.7	0.25				1	0	0	0	1	0	0		warning	5
Butyl levulinate	2052-15-5	organic	liquid	172.22	Combi-Blocks	2023-01-02	https://sds.chemicalsafety.com/sds/pda/msds/getpdf.ashx?action=msdsdocument&auth=200C200C200C200C2008207A200D2078200C200C200C200C200C200C200C200C200C2008&param1=ZmRwLjFfMTIxNTYxMTNORQ==&unique=1678278804&session=16a6a8da7e51bf4b79e724bfec6661d4&hostname=139.28.41.7	0				0	0	0	0	0	0	0		none	0
Methyl octanoate	111-11-5	organic	liquid	158.24	Sigma-Aldrich	2022-09-06	https://sds.chemicalsafety.com/sds/pda/msds/getpdf.ashx?action=msdsdocument&auth=200C200C200C200C2008207A200D2078200C200C200C200C200C200C200C200C200C2008&param1=ZmRwLjFfMjMwNDYwMDNORQ==&unique=1678278942&session=16a6a8da7e51bf4b79e724bfec6661d4&hostname=139.28.41.7	0.25	0.916667	1.1547	125.967	1	0	0	0	1	0	0	0.333333	warning	5	8.33333
Methyl octanoate	111-11-5	organic	liquid	158.24	Thermo Fisher	2021-07-23	https://sds.chemicalsafety.com/sds/pda/msds/getpdf.ashx?action=msdsdocument&auth=200C200C200C200C2008207A200D2078200C200C200C200C200C200C200C200C200C2008&param1=ZmRwLjFfNjQ4MTAzMTNORQ==&unique=1678279023&session=16a6a8da7e51bf4b79e724bfec6661d4&hostname=139.28.41.7	0.25				1	0	0	0	1	0	0		warning	5
Methyl octanoate	111-11-5	organic	liquid	158.24	Combi-Blocks	2023-01-02	https://sds.chemicalsafety.com/sds/pda/msds/getpdf.ashx?action=msdsdocument&auth=200C200C200C200C2008207A200D2078200C200C200C200C200C200C200C200C200C2008&param1=ZmRwLjFfMjY5MjYxMTNORQ==&unique=1678279070&session=16a6a8da7e51bf4b79e724bfec6661d4&hostname=139.28.41.7	2.25				4	0	2	1	1	0	1		warning	15
(−)-Methyl L-lactate	27871-49-4	organic	liquid	104.10	Sigma-Aldrich	2022-11-15	https://sds.chemicalsafety.com/sds/pda/msds/getpdf.ashx?action=msdsdocument&auth=200C200C200C200C2008207A200D2078200C200C200C200C200C200C200C200C200C2008&param1=ZmRwLjFfNTgzNzU2MDNORQ==&unique=1678279212&session=16a6a8da7e51bf4b79e724bfec6661d4&hostname=139.28.41.7	1.75	2.08333	0.57735	27.7128	3	0	1	2	0	0	2	2	warning	19	19
(−)-Methyl L-lactate	27871-49-4	organic	liquid	104.10	Thermo Fisher	2020-02-14	https://sds.chemicalsafety.com/sds/pda/msds/getpdf.ashx?action=msdsdocument&auth=200C200C200C200C2008207A200D2078200C200C200C200C200C200C200C200C200C2008&param1=ZmRwLjFfNzk4NDAzMTNORQ==&unique=1678279315&session=16a6a8da7e51bf4b79e724bfec6661d4&hostname=139.28.41.7	2.75				4	1	1	2	0	0	2		warning	20
(−)-Methyl L-lactate	27871-49-4	organic	liquid	104.10	Combi-Blocks	2023-01-02	https://sds.chemicalsafety.com/sds/pda/msds/getpdf.ashx?action=msdsdocument&auth=200C200C200C200C2008207A200D2078200C200C200C200C200C200C200C200C200C2008&param1=ZmRwLjFfMTY1MDYxMTNORQ==&unique=1678279403&session=9fb99e836c4b7336d87ac9618d7cc9cd&hostname=139.28.41.7	1.75				3	0	1	2	0	0	2		warning	18
Methyl linoleate	112-63-0	organic	liquid	294.47	Sigma-Aldrich	2022-04-15	https://sds.chemicalsafety.com/sds/pda/msds/getpdf.ashx?action=msdsdocument&auth=200C200C200C200C2008207A200D2078200C200C200C200C200C200C200C200C200C2008&param1=ZmRwLjFfMzY3MzMzMjNORQ==&unique=1678279776&session=9fb99e836c4b7336d87ac9618d7cc9cd&hostname=139.28.41.7	0	0	0	0	0	0	0	0	0	0	0	0	none	0	0
Methyl linoleate	112-63-0	organic	liquid	294.47	Thermo Fisher	2020-02-14	https://sds.chemicalsafety.com/sds/pda/msds/getpdf.ashx?action=msdsdocument&auth=200C200C200C200C2008207A200D2078200C200C200C200C200C200C200C200C200C2008&param1=ZmRwLjFfNjQyMzAzMTNORQ==&unique=1678279846&session=9fb99e836c4b7336d87ac9618d7cc9cd&hostname=139.28.41.7	0				0	0	0	0	0	0	0		none	0
Methyl linoleate	112-63-0	organic	liquid	294.47	Combi-Blocks	2023-01-02	https://sds.chemicalsafety.com/sds/pda/msds/getpdf.ashx?action=msdsdocument&auth=200C200C200C200C2008207A200D2078200C200C200C200C200C200C200C200C200C2008&param1=ZmRwLjFfMTcxOTYxMTNORQ==&unique=1678279876&session=9fb99e836c4b7336d87ac9618d7cc9cd&hostname=139.28.41.7	0				0	0	0	0	0	0	0		none	0
Methyl oleate	112-62-9	organic	liquid	296.49	Sigma-Aldrich	2022-04-30	https://sds.chemicalsafety.com/sds/pda/msds/getpdf.ashx?action=msdsdocument&auth=200C200C200C200C2008207A200D2078200C200C200C200C200C200C200C200C200C2008&param1=ZmRwLjFfODQxNDgxMjNORQ==&unique=1678280316&session=9fb99e836c4b7336d87ac9618d7cc9cd&hostname=139.28.41.7	0	0	0	0	0	0	0	0	0	0	0	0	none	0	0
Methyl oleate	112-62-9	organic	liquid	296.49	Thermo Fisher	2020-02-14	https://sds.chemicalsafety.com/sds/pda/msds/getpdf.ashx?action=msdsdocument&auth=200C200C200C200C2008207A200D2078200C200C200C200C200C200C200C200C200C2008&param1=ZmRwLjFfMTIyMjAzMTNORQ==&unique=1678280383&session=9fb99e836c4b7336d87ac9618d7cc9cd&hostname=139.28.41.7	0				0	0	0	0	0	0	0		none	0
Methyl oleate	112-62-9	organic	liquid	296.49	Combi-Blocks	2023-01-02	https://sds.chemicalsafety.com/sds/pda/msds/getpdf.ashx?action=msdsdocument&auth=200C200C200C200C2008207A200D2078200C200C200C200C200C200C200C200C200C2008&param1=ZmRwLjFfMzI3MTYxMTNORQ==&unique=1678280417&session=9fb99e836c4b7336d87ac9618d7cc9cd&hostname=139.28.41.7	0				0	0	0	0	0	0	0		none	0
Methyl palmitate	112-39-0	organic	solid	270.45	Sigma-Aldrich	2021-08-24	https://sds.chemicalsafety.com/sds/pda/msds/getpdf.ashx?action=msdsdocument&auth=200C200C200C200C2008207A200D2078200C200C200C200C200C200C200C200C200C2008&param1=ZmRwLjFfMzg4NDgxMjNORQ==&unique=1678280518&session=9fb99e836c4b7336d87ac9618d7cc9cd&hostname=139.28.41.7	0	0	0	0	0	0	0	0	0	0	0	0	none	0	0
Methyl palmitate	112-39-0	organic	solid	270.45	Thermo Fisher	2020-02-14	https://sds.chemicalsafety.com/sds/pda/msds/getpdf.ashx?action=msdsdocument&auth=200C200C200C200C2008207A200D2078200C200C200C200C200C200C200C200C200C2008&param1=ZmRwLjFfNDQyMjAzMTNORQ==&unique=1678280581&session=9fb99e836c4b7336d87ac9618d7cc9cd&hostname=139.28.41.7	0				0	0	0	0	0	0	0		none	0
Methyl palmitate	112-39-0	organic	solid	270.45	Combi-Blocks	2023-01-02	https://sds.chemicalsafety.com/sds/pda/msds/getpdf.ashx?action=msdsdocument&auth=200C200C200C200C2008207A200D2078200C200C200C200C200C200C200C200C200C2008&param1=ZmRwLjFfMjE1MzYxMTNORQ==&unique=1678280610&session=9fb99e836c4b7336d87ac9618d7cc9cd&hostname=139.28.41.7	0				0	0	0	0	0	0	0		none	0
Isopropyl palmitate	142-91-6	organic	liquid	298.50	Sigma-Aldrich	2022-04-28	https://sds.chemicalsafety.com/sds/pda/msds/getpdf.ashx?action=msdsdocument&auth=200C200C200C200C2008207A200D2078200C200C200C200C200C200C200C200C200C2008&param1=ZmRwLjFfNzYzMjYwMDNORQ==&unique=1678280697&session=9fb99e836c4b7336d87ac9618d7cc9cd&hostname=139.28.41.7	0	0.5	0.866025	173.205	0	0	0	0	0	0	0	0.333333	none	0	2.33333
Isopropyl palmitate	142-91-6	organic	liquid	298.50	Thermo Fisher	2020-02-18	https://sds.chemicalsafety.com/sds/pda/msds/getpdf.ashx?action=msdsdocument&auth=200C200C200C200C2008207A200D2078200C200C200C200C200C200C200C200C200C2008&param1=ZmRwLjFfOTY5MzAzMTNORQ==&unique=1678280770&session=9fb99e836c4b7336d87ac9618d7cc9cd&hostname=139.28.41.7	0				0	0	0	0	0	0	0		none	0
Isopropyl palmitate	142-91-6	organic	liquid	298.50	Combi-Blocks	2023-01-02	https://sds.chemicalsafety.com/sds/pda/msds/getpdf.ashx?action=msdsdocument&auth=200C200C200C200C2008207A200D2078200C200C200C200C200C200C200C200C200C2008&param1=ZmRwLjFfODU2MDYxMTNORQ==&unique=1678280795&session=9fb99e836c4b7336d87ac9618d7cc9cd&hostname=139.28.41.7	1.5				2	0	2	0	0	0	1		warning	7
Methyl stearate	112-61-8	organic	solid	298.50	Sigma-Aldrich	2021-08-24	https://sds.chemicalsafety.com/sds/pda/msds/getpdf.ashx?action=msdsdocument&auth=200C200C200C200C2008207A200D2078200C200C200C200C200C200C200C200C200C2008&param1=ZmRwLjFfODMyNTgxMjNORQ==&unique=1678280892&session=9fb99e836c4b7336d87ac9618d7cc9cd&hostname=139.28.41.7	0	0	0	0	0	0	0	0	0	0	0	0	none	0	0
Methyl stearate	112-61-8	organic	solid	298.50	Thermo Fisher	2020-02-14	https://sds.chemicalsafety.com/sds/pda/msds/getpdf.ashx?action=msdsdocument&auth=200C200C200C200C2008207A200D2078200C200C200C200C200C200C200C200C200C2008&param1=ZmRwLjFfOTA5NDAzMTNORQ==&unique=1678280956&session=9fb99e836c4b7336d87ac9618d7cc9cd&hostname=139.28.41.7	0				0	0	0	0	0	0	0		none	0
Methyl stearate	112-61-8	organic	solid	298.50	Combi-Blocks	2023-01-02	https://sds.chemicalsafety.com/sds/pda/msds/getpdf.ashx?action=msdsdocument&auth=200C200C200C200C2008207A200D2078200C200C200C200C200C200C200C200C200C2008&param1=ZmRwLjFfNDM0MDYxMTNORQ==&unique=1678280979&session=9fb99e836c4b7336d87ac9618d7cc9cd&hostname=139.28.41.7	0				0	0	0	0	0	0	0		none	0
Benzyl benzoate	120-51-4	organic	liquid	212.24	Sigma-Aldrich	2022-10-19	https://sds.chemicalsafety.com/sds/pda/msds/getpdf.ashx?action=msdsdocument&auth=200C200C200C200C2008207A200D2078200C200C200C200C200C200C200C200C200C2008&param1=ZmRwLjFfNTc5MjQ2MDNORQ==&unique=1678281203&session=9fb99e836c4b7336d87ac9618d7cc9cd&hostname=139.28.41.7	1	0.75	0.433013	57.735	2	0	1	0	1	0	2	1.66667	warning	6	5.66667
Benzyl benzoate	120-51-4	organic	liquid	212.24	Thermo Fisher	2020-02-14	https://sds.chemicalsafety.com/sds/pda/msds/getpdf.ashx?action=msdsdocument&auth=200C200C200C200C2008207A200D2078200C200C200C200C200C200C200C200C200C2008&param1=ZmRwLjFfMzEwMDAzMTNORQ==&unique=1678281277&session=9fb99e836c4b7336d87ac9618d7cc9cd&hostname=139.28.41.7	0.25				1	0	0	0	1	0	1		warning	5
Benzyl benzoate	120-51-4	organic	liquid	212.24	Combi-Blocks	2023-01-02	https://sds.chemicalsafety.com/sds/pda/msds/getpdf.ashx?action=msdsdocument&auth=200C200C200C200C2008207A200D2078200C200C200C200C200C200C200C200C200C2008&param1=ZmRwLjFfNjg4OTUxMTNORQ==&unique=1678281319&session=9fb99e836c4b7336d87ac9618d7cc9cd&hostname=139.28.41.7	1				2	0	1	0	1	0	2		warning	6
1-Chlorobutane	109-69-3	organic	liquid	92.57	Sigma-Aldrich	2022-10-19	https://sds.chemicalsafety.com/sds/pda/msds/getpdf.ashx?action=msdsdocument&auth=200C200C200C200C2008207A200D2078200C200C200C200C200C200C200C200C200C2008&param1=ZmRwLjFfNzcyOTQ2MDNORQ==&unique=1678282024&session=9fb99e836c4b7336d87ac9618d7cc9cd&hostname=139.28.41.7	2.75	2.25	0.5	22.2222	4	1	1	2	0	0	2	2	danger	15	14.3333
1-Chlorobutane	109-69-3	organic	liquid	92.57	Thermo Fisher	2020-02-14	https://sds.chemicalsafety.com/sds/pda/msds/getpdf.ashx?action=msdsdocument&auth=200C200C200C200C2008207A200D2078200C200C200C200C200C200C200C200C200C2008&param1=ZmRwLjFfMDA5MTEzMTNORQ==&unique=1678282111&session=9fb99e836c4b7336d87ac9618d7cc9cd&hostname=139.28.41.7	1.75				2	1	1	0	0	0	2		danger	14
1-Chlorobutane	109-69-3	organic	liquid	92.57	Combi-Blocks	2023-01-02	https://sds.chemicalsafety.com/sds/pda/msds/getpdf.ashx?action=msdsdocument&auth=200C200C200C200C2008207A200D2078200C200C200C200C200C200C200C200C200C2008&param1=ZmRwLjFfODUyNjUxMTNORQ==&unique=1678282151&session=9fb99e836c4b7336d87ac9618d7cc9cd&hostname=139.28.41.7	2.25				3	1	1	1	0	0	2		danger	14
1-Chloropentane	543-59-9	organic	liquid	106.59	Sigma-Aldrich	2022-08-28	https://sds.chemicalsafety.com/sds/pda/msds/getpdf.ashx?action=msdsdocument&auth=200C200C200C200C2008207A200D2078200C200C200C200C200C200C200C200C200C2008&param1=ZmRwLjFfODE0NjkwMDNORQ==&unique=1678282251&session=9fb99e836c4b7336d87ac9618d7cc9cd&hostname=139.28.41.7	1.5	1.5	0	0	4	0	1	0	3	0	2	2	danger	18	19
1-Chloropentane	543-59-9	organic	liquid	106.59	Thermo Fisher	2020-02-14	https://sds.chemicalsafety.com/sds/pda/msds/getpdf.ashx?action=msdsdocument&auth=200C200C200C200C2008207A200D2078200C200C200C200C200C200C200C200C200C2008&param1=ZmRwLjFfOTI3MjEzMTNORQ==&unique=1678282331&session=9fb99e836c4b7336d87ac9618d7cc9cd&hostname=139.28.41.7	1.5				4	0	1	0	3	0	2		danger	21
1-Chloropentane	543-59-9	organic	liquid	106.59	Combi-Blocks	2023-01-02	https://sds.chemicalsafety.com/sds/pda/msds/getpdf.ashx?action=msdsdocument&auth=200C200C200C200C2008207A200D2078200C200C200C200C200C200C200C200C200C2008&param1=ZmRwLjFfOTgyMDYxMTNORQ==&unique=1678282377&session=9fb99e836c4b7336d87ac9618d7cc9cd&hostname=139.28.41.7	1.5				4	0	1	0	3	0	2		danger	18
1-Butanol	71-36-3	organic	liquid	74.12	Sigma-Aldrich	2022-10-19	https://sds.chemicalsafety.com/sds/pda/msds/getpdf.ashx?action=msdsdocument&auth=200C200C200C200C2008207A200D2078200C200C200C200C200C200C200C200C200C2008&param1=ZmRwLjFfNTA0NjQ0MDNORQ==&unique=1678309097&session=2751172db67a17ce680fd5a8642fbf45&hostname=139.28.41.7	3	3.33333	0.57735	17.3205	5	1	1	2	1	0	3	3	danger	22	19
1-Butanol	71-36-3	organic	liquid	74.12	Thermo Fisher	2020-02-14	https://sds.chemicalsafety.com/sds/pda/msds/getpdf.ashx?action=msdsdocument&auth=200C200C200C200C2008207A200D2078200C200C200C200C200C200C200C200C200C2008&param1=ZmRwLjFfNTQ5MDEzMTNORQ==&unique=1678309264&session=2751172db67a17ce680fd5a8642fbf45&hostname=139.28.41.7	4				6	2	1	2	1	0	3		danger	26
1-Butanol	71-36-3	organic	liquid	74.12	PANREAC QUIMICA S.L.U.	2020-07-22	https://sds.chemicalsafety.com/sds/pda/msds/getpdf.ashx?action=msdsdocument&auth=200C200C200C200C2008207A200D2078200C200C200C200C200C200C200C200C200C2008&param1=ZmRwLjFfMDQ3Nzg1MDNORQ==&unique=1678309344&session=2751172db67a17ce680fd5a8642fbf45&hostname=139.28.41.7	3				5	1	1	2	1	0	3		danger	9
Isobutanol	78-83-1	organic	liquid	74.12	Sigma-Aldrich	2021-03-07	https://sds.chemicalsafety.com/sds/pda/msds/getpdf.ashx?action=msdsdocument&auth=200C200C200C200C2008207A200D2078200C200C200C200C200C200C200C200C200C2008&param1=ZmRwLjFfMzczNDgxMjNORQ==&unique=1678309489&session=2751172db67a17ce680fd5a8642fbf45&hostname=139.28.41.7	2.75	3.08333	0.57735	18.7249	4	1	1	2	0	0	3	3	danger	20	17
Isobutanol	78-83-1	organic	liquid	74.12	Thermo Fisher	2020-02-14	https://sds.chemicalsafety.com/sds/pda/msds/getpdf.ashx?action=msdsdocument&auth=200C200C200C200C2008207A200D2078200C200C200C200C200C200C200C200C200C2008&param1=ZmRwLjFfOTA4NTAzMTNORQ==&unique=1678309581&session=2751172db67a17ce680fd5a8642fbf45&hostname=139.28.41.7	3.75				5	2	1	2	0	0	3		danger	23
Isobutanol	78-83-1	organic	liquid	74.12	PANREAC QUIMICA S.L.U.	2020-02-18	https://sds.chemicalsafety.com/sds/pda/msds/getpdf.ashx?action=msdsdocument&auth=200C200C200C200C2008207A200D2078200C200C200C200C200C200C200C200C200C2008&param1=ZmRwLjFfOTYzNzg1MDNORQ==&unique=1678309649&session=2751172db67a17ce680fd5a8642fbf45&hostname=139.28.41.7	2.75				4	1	1	2	0	0	3		danger	8
o-Cresol	95-48-7	organic	solid	108.14	Sigma-Aldrich	2022-06-27	https://sds.chemicalsafety.com/sds/pda/msds/getpdf.ashx?action=msdsdocument&auth=200C200C200C200C2008207A200D2078200C200C200C200C200C200C200C200C200C2008&param1=ZmRwLjFfNDUxNTgxMjNORQ==&unique=1678310225&session=2751172db67a17ce680fd5a8642fbf45&hostname=139.28.41.7	4.25	3.66667	1.46487	39.9509	6	2	1	3	0	0	2	2	danger	13	13
o-Cresol	95-48-7	organic	solid	108.14	Thermo Fisher	2022-04-26	https://sds.chemicalsafety.com/sds/pda/msds/getpdf.ashx?action=msdsdocument&auth=200C200C200C200C2008207A200D2078200C200C200C200C200C200C200C200C200C2008&param1=ZmRwLjFfNjE5NjAzMTNORQ==&unique=1678310373&session=2751172db67a17ce680fd5a8642fbf45&hostname=139.28.41.7	4.75				7	3	0	3	1	0	2		danger	18
o-Cresol	95-48-7	organic	solid	108.14	PANREAC QUIMICA S.L.U.	2021-03-26	https://sds.chemicalsafety.com/sds/pda/msds/getpdf.ashx?action=msdsdocument&auth=200C200C200C200C2008207A200D2078200C200C200C200C200C200C200C200C200C2008&param1=ZmRwLjFfNDU4NTg1MDNORQ==&unique=1678310436&session=2751172db67a17ce680fd5a8642fbf45&hostname=139.28.41.7	2				3	1	0	2	0	0	2		danger	8
Acetaldehyde	75-07-0	organic	liquid	44.05	Sigma-Aldrich	2023-02-07	https://sds.chemicalsafety.com/sds/pda/msds/getpdf.ashx?action=msdsdocument&auth=200C200C200C200C2008207A200D2078200C200C200C200C200C200C200C200C200C2008&param1=ZmRwLjFfNjQ4MzgxMjNORQ==&unique=1678352996&session=2751172db67a17ce680fd5a8642fbf45&hostname=139.28.41.7	4.5	4.66667	0.520416	11.1518	6	2	2	2	0	0	3	3	danger	23	18.3333
Acetaldehyde	75-07-0	organic	liquid	44.05	Thermo Fisher	2020-11-12	https://sds.chemicalsafety.com/sds/pda/msds/getpdf.ashx?action=msdsdocument&auth=200C200C200C200C2008207A200D2078200C200C200C200C200C200C200C200C200C2008&param1=ZmRwLjFfNjQ4OTkyMTNORQ==&unique=1678353103&session=2751172db67a17ce680fd5a8642fbf45&hostname=139.28.41.7	5.25				7	3	2	1	1	0	3		danger	26
Acetaldehyde	75-07-0	organic	liquid	44.05	AppliChem GmbH	2021-04-19	https://sds.chemicalsafety.com/sds/pda/msds/getpdf.ashx?action=msdsdocument&auth=200C200C200C200C2008207A200D2078200C200C200C200C200C200C200C200C200C2008&param1=ZmRwLjFfNjE5NTg1MDNORQ==&unique=1678353186&session=2751172db67a17ce680fd5a8642fbf45&hostname=139.28.41.7	4.25				6	2	2	1	1	0	3		danger	6
Propionaldehyde	123-38-6	organic	liquid	58.08	Sigma-Aldrich	2021-05-27	https://sds.chemicalsafety.com/sds/pda/msds/getpdf.ashx?action=msdsdocument&auth=200C200C200C200C2008207A200D2078200C200C200C200C200C200C200C200C200C2008&param1=ZmRwLjFfNzQ3MTQxMjNORQ==&unique=1678353333&session=2751172db67a17ce680fd5a8642fbf45&hostname=139.28.41.7	4	4	0.5	12.5	7	1	2	2	2	0	3	3	danger	23	23
Propionaldehyde	123-38-6	organic	liquid	58.08	Thermo Fisher	2020-02-14	https://sds.chemicalsafety.com/sds/pda/msds/getpdf.ashx?action=msdsdocument&auth=200C200C200C200C2008207A200D2078200C200C200C200C200C200C200C200C200C2008&param1=ZmRwLjFfMTM2ODAzMTNORQ==&unique=1678353437&session=2751172db67a17ce680fd5a8642fbf45&hostname=139.28.41.7	4.5				7	2	2	1	2	0	3		danger	25
Propionaldehyde	123-38-6	organic	liquid	58.08	Combi-Blocks	2021-04-26	https://sds.chemicalsafety.com/sds/pda/msds/getpdf.ashx?action=msdsdocument&auth=200C200C200C200C2008207A200D2078200C200C200C200C200C200C200C200C200C2008&param1=ZmRwLjFfOTk2NzUxMTNORQ==&unique=1678353495&session=2751172db67a17ce680fd5a8642fbf45&hostname=139.28.41.7	3.5				6	1	2	1	2	0	3		danger	21
Butyraldehyde	123-72-8	organic	liquid	72.11	Sigma-Aldrich	2022-09-08	https://sds.chemicalsafety.com/sds/pda/msds/getpdf.ashx?action=msdsdocument&auth=200C200C200C200C2008207A200D2078200C200C200C200C200C200C200C200C200C2008&param1=ZmRwLjFfMjYzMTkxMjNORQ==&unique=1678353626&session=2751172db67a17ce680fd5a8642fbf45&hostname=139.28.41.7	2	1.66667	0.288675	17.3205	3	0	2	1	0	0	2	2	danger	15	14.3333
Butyraldehyde	123-72-8	organic	liquid	72.11	Thermo Fisher	2022-05-03	https://sds.chemicalsafety.com/sds/pda/msds/getpdf.ashx?action=msdsdocument&auth=200C200C200C200C2008207A200D2078200C200C200C200C200C200C200C200C200C2008&param1=ZmRwLjFfOTk1MDAzMTNORQ==&unique=1678353718&session=2751172db67a17ce680fd5a8642fbf45&hostname=139.28.41.7	1.5				2	0	2	0	0	0	2		danger	14
Butyraldehyde	123-72-8	organic	liquid	72.11	Combi-Blocks	2023-01-02	https://sds.chemicalsafety.com/sds/pda/msds/getpdf.ashx?action=msdsdocument&auth=200C200C200C200C2008207A200D2078200C200C200C200C200C200C200C200C200C2008&param1=ZmRwLjFfNTk4MjYxMTNORQ==&unique=1678353762&session=2751172db67a17ce680fd5a8642fbf45&hostname=139.28.41.7	1.5				2	0	2	0	0	0	2		danger	14
2-Pentanone	107-87-9	organic	liquid	86.13	Sigma-Aldrich	2023-02-07	https://sds.chemicalsafety.com/sds/pda/msds/getpdf.ashx?action=msdsdocument&auth=200C200C200C200C2008207A200D2078200C200C200C200C200C200C200C200C200C2008&param1=ZmRwLjFfMzM0NzgxMjNORQ==&unique=1678353877&session=2751172db67a17ce680fd5a8642fbf45&hostname=139.28.41.7	2.5	2.41667	0.629153	26.0339	4	0	3	0	1	0	3	2.33333	danger	20	19.6667
2-Pentanone	107-87-9	organic	liquid	86.13	Thermo Fisher	2020-02-14	https://sds.chemicalsafety.com/sds/pda/msds/getpdf.ashx?action=msdsdocument&auth=200C200C200C200C2008207A200D2078200C200C200C200C200C200C200C200C200C2008&param1=ZmRwLjFfMjQ1OTgyMTNORQ==&unique=1678353974&session=2751172db67a17ce680fd5a8642fbf45&hostname=139.28.41.7	1.75				3	0	2	0	1	0	2		danger	17
2-Pentanone	107-87-9	organic	liquid	86.13	Combi-Blocks	2023-01-02	https://sds.chemicalsafety.com/sds/pda/msds/getpdf.ashx?action=msdsdocument&auth=200C200C200C200C2008207A200D2078200C200C200C200C200C200C200C200C200C2008&param1=ZmRwLjFfNjIyNDYxMTNORQ==&unique=1678354019&session=2751172db67a17ce680fd5a8642fbf45&hostname=139.28.41.7	3				5	0	3	1	1	0	2		danger	22
3-Pentanone	96-22-0	organic	liquid	86.13	Sigma-Aldrich	2021-09-19	https://sds.chemicalsafety.com/sds/pda/msds/getpdf.ashx?action=msdsdocument&auth=200C200C200C200C2008207A200D2078200C200C200C200C200C200C200C200C200C2008&param1=ZmRwLjFfNzQwNTgxMjNORQ==&unique=1678354165&session=2751172db67a17ce680fd5a8642fbf45&hostname=139.28.41.7	2	2.25	0.661438	29.3972	3	0	2	1	0	0	2	2	danger	19	18
3-Pentanone	96-22-0	organic	liquid	86.13	Thermo Fisher	2020-02-14	https://sds.chemicalsafety.com/sds/pda/msds/getpdf.ashx?action=msdsdocument&auth=200C200C200C200C2008207A200D2078200C200C200C200C200C200C200C200C200C2008&param1=ZmRwLjFfOTkzMDkyMTNORQ==&unique=1678354250&session=2751172db67a17ce680fd5a8642fbf45&hostname=139.28.41.7	3				4	1	2	1	0	0	2		danger	20
3-Pentanone	96-22-0	organic	liquid	86.13	Combi-Blocks	2023-01-02	https://sds.chemicalsafety.com/sds/pda/msds/getpdf.ashx?action=msdsdocument&auth=200C200C200C200C2008207A200D2078200C200C200C200C200C200C200C200C200C2008&param1=ZmRwLjFfNzk0NjUxMTNORQ==&unique=1678354292&session=2751172db67a17ce680fd5a8642fbf45&hostname=139.28.41.7	1.75				3	0	1	2	0	0	2		danger	15
Cyclohexanone	108-94-1	organic	liquid	98.14	Sigma-Aldrich	2023-01-31	https://sds.chemicalsafety.com/sds/pda/msds/getpdf.ashx?action=msdsdocument&auth=200C200C200C200C2008207A200D2078200C200C200C200C200C200C200C200C200C2008&param1=ZmRwLjFfNTgyNjMwMDNORQ==&unique=1678354964&session=2751172db67a17ce680fd5a8642fbf45&hostname=139.28.41.7	3.5	3.66667	0.763763	20.8299	7	1	1	2	3	0	3	3	danger	21	23
Cyclohexanone	108-94-1	organic	liquid	98.14	Thermo Fisher	2020-05-28	https://sds.chemicalsafety.com/sds/pda/msds/getpdf.ashx?action=msdsdocument&auth=200C200C200C200C2008207A200D2078200C200C200C200C200C200C200C200C200C2008&param1=ZmRwLjFfOTg0MDAzMTNORQ==&unique=1678355063&session=2751172db67a17ce680fd5a8642fbf45&hostname=139.28.41.7	4.5				8	2	1	2	3	0	3		danger	27
Cyclohexanone	108-94-1	organic	liquid	98.14	Combi-Blocks	2023-01-02	https://sds.chemicalsafety.com/sds/pda/msds/getpdf.ashx?action=msdsdocument&auth=200C200C200C200C2008207A200D2078200C200C200C200C200C200C200C200C200C2008&param1=ZmRwLjFfOTQ5ODUxMTNORQ==&unique=1678355119&session=2751172db67a17ce680fd5a8642fbf45&hostname=139.28.41.7	3				6	1	1	1	3	0	3		danger	21
(R)-(+)-Limonene	5989-27-5	organic	liquid	136.23	Sigma-Aldrich	2021-10-07	https://sds.chemicalsafety.com/sds/pda/msds/getpdf.ashx?action=msdsdocument&auth=200C200C200C200C2008207A200D2078200C200C200C200C200C200C200C200C200C2008&param1=ZmRwLjFfMzY0OTQ2MDNORQ==&unique=1678355228&session=2751172db67a17ce680fd5a8642fbf45&hostname=139.28.41.7	5.25	4.5	0.661438	14.6986	6	4	1	1	0	0	4	3.66667	danger	21	21.3333
(R)-(+)-Limonene	5989-27-5	organic	liquid	136.23	Thermo Fisher	2020-02-14	https://sds.chemicalsafety.com/sds/pda/msds/getpdf.ashx?action=msdsdocument&auth=200C200C200C200C2008207A200D2078200C200C200C200C200C200C200C200C200C2008&param1=ZmRwLjFfMDcxNzAzMTNORQ==&unique=1678355330&session=2751172db67a17ce680fd5a8642fbf45&hostname=139.28.41.7	4				5	2	2	1	0	0	3		danger	21
(R)-(+)-Limonene	5989-27-5	organic	liquid	136.23	Combi-Blocks	2023-01-02	https://sds.chemicalsafety.com/sds/pda/msds/getpdf.ashx?action=msdsdocument&auth=200C200C200C200C2008207A200D2078200C200C200C200C200C200C200C200C200C2008&param1=ZmRwLjFfNDU1OTUxMTNORQ==&unique=1678355385&session=2751172db67a17ce680fd5a8642fbf45&hostname=139.28.41.7	4.25				5	3	1	1	0	0	4		warning	22
β-Pinene	18172-67-3	organic	liquid	136.23	Sigma-Aldrich	2022-09-08	https://sds.chemicalsafety.com/sds/pda/msds/getpdf.ashx?action=msdsdocument&auth=200C200C200C200C2008207A200D2078200C200C200C200C200C200C200C200C200C2008&param1=ZmRwLjFfODM0ODU2MDNORQ==&unique=1678355895&session=2751172db67a17ce680fd5a8642fbf45&hostname=139.28.41.7	5.25	4.83333	0.721688	14.9315	6	4	1	1	0	0	4	3.33333	danger	21	22.3333
β-Pinene	18172-67-3	organic	liquid	136.23	Thermo Fisher	2020-02-14	https://sds.chemicalsafety.com/sds/pda/msds/getpdf.ashx?action=msdsdocument&auth=200C200C200C200C2008207A200D2078200C200C200C200C200C200C200C200C200C2008&param1=ZmRwLjFfODI2MjEzMTNORQ==&unique=1678356000&session=2751172db67a17ce680fd5a8642fbf45&hostname=139.28.41.7	4				5	2	2	1	0	0	3		danger	21
β-Pinene	18172-67-3	organic	liquid	136.23	Combi-Blocks	2023-01-02	https://sds.chemicalsafety.com/sds/pda/msds/getpdf.ashx?action=msdsdocument&auth=200C200C200C200C2008207A200D2078200C200C200C200C200C200C200C200C200C2008&param1=ZmRwLjFfOTUyMjYxMTNORQ==&unique=1678356050&session=2751172db67a17ce680fd5a8642fbf45&hostname=139.28.41.7	5.25				9	2	2	2	3	0	3		warning	25
Methyl acetate	79-20-9	organic	liquid	74.08	Sigma-Aldrich	2022-10-19	https://sds.chemicalsafety.com/sds/pda/msds/getpdf.ashx?action=msdsdocument&auth=200C200C200C200C2008207A200D2078200C200C200C200C200C200C200C200C200C2008&param1=ZmRwLjJfOTQ1NDgwMDNORQ==&unique=1678358927&session=2751172db67a17ce680fd5a8642fbf45&hostname=139.28.41.7	2	2.33333	0.57735	24.7436	3	0	2	1	0	0	2	2	danger	19	19
Methyl acetate	79-20-9	organic	liquid	74.08	Thermo Fisher	2020-02-14	https://sds.chemicalsafety.com/sds/pda/msds/getpdf.ashx?action=msdsdocument&auth=200C200C200C200C2008207A200D2078200C200C200C200C200C200C200C200C200C2008&param1=ZmRwLjFfMDQwMjAzMTNORQ==&unique=1678359018&session=2751172db67a17ce680fd5a8642fbf45&hostname=139.28.41.7	3				4	1	2	1	0	0	2		danger	20
Methyl acetate	79-20-9	organic	liquid	74.08	Combi-Blocks	2023-01-02	https://sds.chemicalsafety.com/sds/pda/msds/getpdf.ashx?action=msdsdocument&auth=200C200C200C200C2008207A200D2078200C200C200C200C200C200C200C200C200C2008&param1=ZmRwLjFfNTg1NDYxMTNORQ==&unique=1678359066&session=2751172db67a17ce680fd5a8642fbf45&hostname=139.28.41.7	2				3	0	2	1	0	0	2		danger	18
1-Hexanol	111-27-3	organic	liquid	102.17	Sigma-Aldrich	2022-09-08	https://sds.chemicalsafety.com/sds/pda/msds/getpdf.ashx?action=msdsdocument&auth=200C200C200C200C2008207A200D2078200C200C200C200C200C200C200C200C200C2008&param1=ZmRwLjFfNDQ2MjMwMDNORQ==&unique=1678364853&session=2430283b0df3d656d5ac4650fb9d03d8&hostname=78.8.217.118	2.5	2	0.433013	21.6506	5	0	2	1	2	0	2	2	warning	18	19
1-Hexanol	111-27-3	organic	liquid	102.17	Combi-Blocks	2023-01-02	https://sds.chemicalsafety.com/sds/pda/msds/getpdf.ashx?action=msdsdocument&auth=200C200C200C200C2008207A200D2078200C200C200C200C200C200C200C200C200C2008&param1=ZmRwLjFfNTk4NTUxMTNORQ==&unique=1678364849&session=2430283b0df3d656d5ac4650fb9d03d8&hostname=78.8.217.118	1.75				4	0	1	1	2	0	2		warning	17
1-Hexanol	111-27-3	organic	liquid	102.17	Thermo Fisher	2020-02-14	https://sds.chemicalsafety.com/sds/pda/msds/getpdf.ashx?action=msdsdocument&auth=200C200C200C200C2008207A200D2078200C200C200C200C200C200C200C200C200C2008&param1=ZmRwLjFfNTQwMjEzMTNORQ==&unique=1678364853&session=2430283b0df3d656d5ac4650fb9d03d8&hostname=78.8.217.118	1.75				4	0	1	1	2	0	2		warning	22
Isobutyl acetate	110-19-0	organic	liquid	116.16	Sigma-Aldrich	2021-04-13	https://sds.chemicalsafety.com/sds/pda/msds/getpdf.ashx?action=msdsdocument&auth=200C200C200C200C2008207A200D2078200C200C200C200C200C200C200C200C200C2008&param1=ZmRwLjNfNzc5MzgwMDNORQ==&unique=1678365612&session=2430283b0df3d656d5ac4650fb9d03d8&hostname=78.8.217.118	1.75	1.75	0.5	28.5714	3	0	1	2	0	0	2	2	danger	17	17
Isobutyl acetate	110-19-0	organic	liquid	116.16	Thermo Fisher	2020-05-06	https://sds.chemicalsafety.com/sds/pda/msds/getpdf.ashx?action=msdsdocument&auth=200C200C200C200C2008207A200D2078200C200C200C200C200C200C200C200C200C2008&param1=ZmRwLjFfNzU3MTAzMTNORQ==&unique=1678365615&session=2430283b0df3d656d5ac4650fb9d03d8&hostname=78.8.217.118	2.25				3	1	1	1	0	0	2		danger	17
Isobutyl acetate	110-19-0	organic	liquid	116.16	Honeywell International Inc.	2022-07-29	https://sds.chemicalsafety.com/sds/pda/msds/getpdf.ashx?action=msdsdocument&auth=200C200C200C200C2008207A200D2078200C200C200C200C200C200C200C200C200C2008&param1=ZmRwLjFfMjcxMjM0MjNORQ==&unique=1678365609&session=2430283b0df3d656d5ac4650fb9d03d8&hostname=78.8.217.118	1.25				2	0	1	1	0	0	2		danger
2-Ethylhexyl acetate	103-09-3	organic	liquid	172.26	Sigma-Aldrich	2021-10-08	https://sds.chemicalsafety.com/sds/pda/msds/getpdf.ashx?action=msdsdocument&auth=200C200C200C200C2008207A200D2078200C200C200C200C200C200C200C200C200C2008&param1=ZmRwLjFfMTE5NjgxMjNORQ==&unique=1678366064&session=2430283b0df3d656d5ac4650fb9d03d8&hostname=78.8.217.118	1	1.16667	0.520416	44.6071	2	0	1	0	1	0	1	1	warning	10	8.66667
2-Ethylhexyl acetate	103-09-3	organic	liquid	172.26	Combi-Blocks	2023-01-02	https://sds.chemicalsafety.com/sds/pda/msds/getpdf.ashx?action=msdsdocument&auth=200C200C200C200C2008207A200D2078200C200C200C200C200C200C200C200C200C2008&param1=ZmRwLjFfOTg1MzYxMTNORQ==&unique=1678366065&session=2430283b0df3d656d5ac4650fb9d03d8&hostname=78.8.217.118	0.75				1	0	1	0	0	0	1		warning	5
2-Ethylhexyl acetate	103-09-3	organic	liquid	172.26	Thermo Fisher	2021-07-23	https://sds.chemicalsafety.com/sds/pda/msds/getpdf.ashx?action=msdsdocument&auth=200C200C200C200C2008207A200D2078200C200C200C200C200C200C200C200C200C2008&param1=ZmRwLjFfMDAzNTEzMTNORQ==&unique=1678366065&session=2430283b0df3d656d5ac4650fb9d03d8&hostname=78.8.217.118	1.75				3	0	2	0	1	0	1		warning	11
Dimethyl succinate	106-65-0	organic	liquid	146.1	Combi-Blocks	2023-01-02	https://sds.chemicalsafety.com/sds/pda/msds/getpdf.ashx?action=msdsdocument&auth=200C200C200C200C2008207A200D2078200C200C200C200C200C200C200C200C200C2008&param1=ZmRwLjFfMjQ4NjUxMTNORQ==&unique=1678367124&session=2430283b0df3d656d5ac4650fb9d03d8&hostname=78.8.217.118	1	0.833333	0.520416	62.45	2	0	1	0	1	0	1	0.666667	warning	8	6.33333
Dimethyl succinate	106-65-0	organic	liquid	146.1	Thermo Fisher	2021-07-23	https://sds.chemicalsafety.com/sds/pda/msds/getpdf.ashx?action=msdsdocument&auth=200C200C200C200C2008207A200D2078200C200C200C200C200C200C200C200C200C2008&param1=ZmRwLjFfMzgxMjAzMTNORQ==&unique=1678367126&session=2430283b0df3d656d5ac4650fb9d03d8&hostname=78.8.217.118	0.25				1	0	0	0	1	0	0		warning	5
Dimethyl succinate	106-65-0	organic	liquid	146.1	Sigma-Aldrich	2022-04-28	https://sds.chemicalsafety.com/sds/pda/msds/getpdf.ashx?action=msdsdocument&auth=200C200C200C200C2008207A200D2078200C200C200C200C200C200C200C200C200C2008&param1=ZmRwLjFfNTIxNTgxMjNORQ==&unique=1678367122&session=2430283b0df3d656d5ac4650fb9d03d8&hostname=78.8.217.118	1.25				2	0	1	1	0	0	1		warning	6
γ-Nonalactone	104-61-0	organic	liquid	156.22	Sigma-Aldrich	2020-01-13	https://sds.chemicalsafety.com/sds/pda/msds/getpdf.ashx?action=msdsdocument&auth=200C200C200C200C2008207A200D2078200C200C200C200C200C200C200C200C200C2008&param1=ZmRwLjFfNjI5NjQ0MDNORQ==&unique=1676926626&session=557fdb86592034636826dc01208cc657&hostname=139.28.41.7	0	0	0	0	0	0	0	0	0	0	0	0	none	0	0
γ-Nonalactone	104-61-0	organic	liquid	156.22	Combi-Blocks	2020-12-14	https://sds.chemicalsafety.com/sds/pda/msds/getpdf.ashx?action=msdsdocument&auth=200C200C200C200C2008207A200D2078200C200C200C200C200C200C200C200C200C2008&param1=ZmRwLjFfODg3MDcxMTNORQ==&unique=1676927203&session=557fdb86592034636826dc01208cc657&hostname=139.28.41.7	0				0	0	0	0	0	0	0		none	0
(−)-Nicotine	54-11-5	organic	liquid	162.23	Sigma-Aldrich	2022-10-19	https://sds.chemicalsafety.com/sds/pda/msds/getpdf.ashx?action=msdsdocument&auth=200C200C200C200C2008207A200D2078200C200C200C200C200C200C200C200C200C2008&param1=ZmRwLjFfMzc4NjgyMjNORQ==&unique=1676928352&session=557fdb86592034636826dc01208cc657&hostname=139.28.41.7	5.5	3.875	2.2981	59.3057	7	1	6	0	0	0	3	2	danger	19	19.5
(−)-Nicotine	54-11-5	organic	liquid	162.23	Thermo Fisher	2020-02-14	https://sds.chemicalsafety.com/sds/pda/msds/getpdf.ashx?action=msdsdocument&auth=200C200C200C200C2008207A200D2078200C200C200C200C200C200C200C200C200C2008&param1=ZmRwLjFfODk1NzAzMTNORQ==&unique=1676928747&session=557fdb86592034636826dc01208cc657&hostname=139.28.41.7	2.25				3	0	3	0	0	0	1		danger	20
1,4-Dichlorobenzene	106-46-7	organic	solid	147.00	Sigma-Aldrich	2021-10-30	https://sds.chemicalsafety.com/sds/pda/msds/getpdf.ashx?action=msdsdocument&auth=200C200C200C200C2008207A200D2078200C200C200C200C200C200C200C200C200C2008&param1=ZmRwLjFfNDkwNzM2MDNORQ==&unique=1676930917&session=557fdb86592034636826dc01208cc657&hostname=139.28.41.7	3.5	3.125	0.53033	16.9706	4	2	2	0	0	0	3	2.5	warning	11	10.5
1,4-Dichlorobenzene	106-46-7	organic	solid	147.00	Thermo Fisher	2020-02-14	https://sds.chemicalsafety.com/sds/pda/msds/getpdf.ashx?action=msdsdocument&auth=200C200C200C200C2008207A200D2078200C200C200C200C200C200C200C200C200C2008&param1=ZmRwLjFfNzcxMDEzMTNORQ==&unique=1676931069&session=557fdb86592034636826dc01208cc657&hostname=139.28.41.7	2.75				3	2	1	0	0	0	2		danger	10
1,5-Pentanediol	111-29-5	organic	liquid	104.15	Sigma-Aldrich	2022-07-01	https://sds.chemicalsafety.com/sds/pda/msds/getpdf.ashx?action=msdsdocument&auth=200C200C200C200C2008207A200D2078200C200C200C200C200C200C200C200C200C2008&param1=ZmRwLjFfNDk2MzgxMjNORQ==&unique=1676931271&session=557fdb86592034636826dc01208cc657&hostname=139.28.41.7	0	0	0	0	0	0	0	0	0	0	0	0	none	0	0
1,5-Pentanediol	111-29-5	organic	liquid	104.15	Thermo Fisher	2020-02-14	https://sds.chemicalsafety.com/sds/pda/msds/getpdf.ashx?action=msdsdocument&auth=200C200C200C200C2008207A200D2078200C200C200C200C200C200C200C200C200C2008&param1=ZmRwLjFfMTkyMTEzMTNORQ==&unique=1676931398&session=557fdb86592034636826dc01208cc657&hostname=139.28.41.7	0				0	0	0	0	0	0	0		none	0
1-Naphthol	90-15-3	organic	solid	144.17	Sigma-Aldrich	2021-09-16	https://sds.chemicalsafety.com/sds/pda/msds/getpdf.ashx?action=msdsdocument&auth=200C200C200C200C2008207A200D2078200C200C200C200C200C200C200C200C200C2008&param1=ZmRwLjJfMTY2MjMwMDNORQ==&unique=1676931814&session=557fdb86592034636826dc01208cc657&hostname=139.28.41.7	6.25	5	1.76777	35.3553	9	3	2	3	1	0	5	3.5	danger	18	19
1-Naphthol	90-15-3	organic	solid	144.17	Thermo Fisher	2020-02-14	https://sds.chemicalsafety.com/sds/pda/msds/getpdf.ashx?action=msdsdocument&auth=200C200C200C200C2008207A200D2078200C200C200C200C200C200C200C200C200C2008&param1=ZmRwLjFfOTI4MjEzMTNORQ==&unique=1676932069&session=557fdb86592034636826dc01208cc657&hostname=139.28.41.7	3.75				6	2	1	1	2	0	2		danger	20
1-Propanol	71-23-8	organic	liquid	60.10	Sigma-Aldrich	2022-04-06	https://sds.chemicalsafety.com/sds/pda/msds/getpdf.ashx?action=msdsdocument&auth=200C200C200C200C2008207A200D2078200C200C200C200C200C200C200C200C200C2008&param1=ZmRwLjFfNTIzNTgxMjNORQ==&unique=1677667467&session=cee9c3e3124a7c78e3d61a62e6a5f1a2&hostname=139.28.41.7	2.25	2.25	0	0	3	1	1	1	0	0	3	3	danger	17	16.5
1-Propanol	71-23-8	organic	liquid	60.10	Combi-Blocks	2023-01-02	https://sds.chemicalsafety.com/sds/pda/msds/getpdf.ashx?action=msdsdocument&auth=200C200C200C200C2008207A200D2078200C200C200C200C200C200C200C200C200C2008&param1=ZmRwLjFfNjc3NjUxMTNORQ==&unique=1677667579&session=cee9c3e3124a7c78e3d61a62e6a5f1a2&hostname=139.28.41.7	2.25				3	1	1	1	0	0	3		danger	16
2,4,6-Trichlorophenol	88-06-2	organic	solid	197.45	Sigma-Aldrich	2021-08-19	https://sds.chemicalsafety.com/sds/pda/msds/getpdf.ashx?action=msdsdocument&auth=200C200C200C200C2008207A200D2078200C200C200C200C200C200C200C200C200C2008&param1=ZmRwLjFfNDQ2MDkxMjNORQ==&unique=1676933364&session=557fdb86592034636826dc01208cc657&hostname=139.28.41.7	4.5	3.5	1.41421	40.4061	6	2	3	0	1	0	3	2.5	warning	16	16
2,4,6-Trichlorophenol	88-06-2	organic	solid	197.45	Thermo Fisher	2020-02-14	https://sds.chemicalsafety.com/sds/pda/msds/getpdf.ashx?action=msdsdocument&auth=200C200C200C200C2008207A200D2078200C200C200C200C200C200C200C200C200C2008&param1=ZmRwLjFfOTEzMjEzMTNORQ==&unique=1676933531&session=557fdb86592034636826dc01208cc657&hostname=139.28.41.7	2.5				4	0	3	0	1	0	2		warning	16
2-Butanone	78-93-3	organic	liquid	72.11	Sigma-Aldrich	2022-11-15	https://sds.chemicalsafety.com/sds/pda/msds/getpdf.ashx?action=msdsdocument&auth=200C200C200C200C2008207A200D2078200C200C200C200C200C200C200C200C200C2008&param1=ZmRwLjFfNzQ5MjMwMDNORQ==&unique=1676975388&session=23742bc2319efd3fb56ee581bcf57170&hostname=139.28.41.7	2	3.375	1.94454	57.6161	3	0	2	1	0	0	2	2.5	danger	19	20
2-Butanone	78-93-3	organic	liquid	72.11	Thermo Fisher	2020-02-14	https://sds.chemicalsafety.com/sds/pda/msds/getpdf.ashx?action=msdsdocument&auth=200C200C200C200C2008207A200D2078200C200C200C200C200C200C200C200C200C2008&param1=ZmRwLjFfMzY1NTEzMTNORQ==&unique=1676975528&session=23742bc2319efd3fb56ee581bcf57170&hostname=139.28.41.7	4.75				6	2	3	1	0	0	3		danger	21
2-Methoxy-3-methylpyrazine	2847-30-5	organic	liquid	124.14	Sigma-Aldrich	2021-04-30	https://sds.chemicalsafety.com/sds/pda/msds/getpdf.ashx?action=msdsdocument&auth=200C200C200C200C2008207A200D2078200C200C200C200C200C200C200C200C200C2008&param1=ZmRwLjFfOTI5ODMwMDNORQ==&unique=1676975815&session=23742bc2319efd3fb56ee581bcf57170&hostname=139.28.41.7	3	1.875	1.59099	84.8528	5	1	1	2	1	0	3	2.5	danger	22	18.5
2-Methoxy-3-methylpyrazine	2847-30-5	organic	liquid	124.14	Thermo Fisher	2020-02-14	https://sds.chemicalsafety.com/sds/pda/msds/getpdf.ashx?action=msdsdocument&auth=200C200C200C200C2008207A200D2078200C200C200C200C200C200C200C200C200C2008&param1=ZmRwLjFfODY4OTgyMTNORQ==&unique=1676975925&session=23742bc2319efd3fb56ee581bcf57170&hostname=139.28.41.7	0.75				2	0	0	1	1	0	2		warning	15
2-Pyrrolidinone	616-45-5	organic	solid	85.10	Sigma-Aldrich	2020-10-12	https://sds.chemicalsafety.com/sds/pda/msds/getpdf.ashx?action=msdsdocument&auth=200C200C200C200C2008207A200D2078200C200C200C200C200C200C200C200C200C2008&param1=ZmRwLjFfODMyMTU2MDNORQ==&unique=1676976794&session=23742bc2319efd3fb56ee581bcf57170&hostname=139.28.41.7	1.75	1.75	0	0	2	1	1	0	0	0	2	2	danger	9	9.5
2-Pyrrolidinone	616-45-5	organic	solid	85.10	Thermo Fisher	2020-11-05	https://sds.chemicalsafety.com/sds/pda/msds/getpdf.ashx?action=msdsdocument&auth=200C200C200C200C2008207A200D2078200C200C200C200C200C200C200C200C200C2008&param1=ZmRwLjFfMzUzMTkyMTNORQ==&unique=1676976930&session=23742bc2319efd3fb56ee581bcf57170&hostname=139.28.41.7	1.75				2	1	1	0	0	0	2		danger	10
3-(Dimethylamino)phenol	99-07-0	organic	solid	137.18	Sigma-Aldrich	2020-10-10	https://sds.chemicalsafety.com/sds/pda/msds/getpdf.ashx?action=msdsdocument&auth=200C200C200C200C2008207A200D2078200C200C200C200C200C200C200C200C200C2008&param1=ZmRwLjFfNjMyMjQwMDNORQ==&unique=1676977067&session=23742bc2319efd3fb56ee581bcf57170&hostname=139.28.41.7	2	2.875	1.23744	43.0413	3	0	2	1	0	0	1	1	warning	13	15.5
3-(Dimethylamino)phenol	99-07-0	organic	solid	137.18	Thermo Fisher	2020-02-14	https://sds.chemicalsafety.com/sds/pda/msds/getpdf.ashx?action=msdsdocument&auth=200C200C200C200C2008207A200D2078200C200C200C200C200C200C200C200C200C2008&param1=ZmRwLjFfMzI1MjkyMTNORQ==&unique=1676977197&session=23742bc2319efd3fb56ee581bcf57170&hostname=139.28.41.7	3.75				7	1	2	1	3	0	1		warning	18
3-Amino-1-propanol	156-87-6	organic	liquid	75.11	Sigma-Aldrich	2022-10-19	https://sds.chemicalsafety.com/sds/pda/msds/getpdf.ashx?action=msdsdocument&auth=200C200C200C200C2008207A200D2078200C200C200C200C200C200C200C200C200C2008&param1=ZmRwLjFfMDczNzM2MDNORQ==&unique=1676977554&session=23742bc2319efd3fb56ee581bcf57170&hostname=139.28.41.7	2.25	3	1.06066	35.3553	3	2	0	0	1	0	2	2	danger	12	13.5
3-Amino-1-propanol	156-87-6	organic	liquid	75.11	Thermo Fisher	2021-10-06	https://sds.chemicalsafety.com/sds/pda/msds/getpdf.ashx?action=msdsdocument&auth=200C200C200C200C2008207A200D2078200C200C200C200C200C200C200C200C200C2008&param1=ZmRwLjFfNTc4MDkyMTNORQ==&unique=1676977771&session=23742bc2319efd3fb56ee581bcf57170&hostname=139.28.41.7	3.75				5	3	0	1	1	0	2		danger	15
3-Aminocoumarin	1635-31-0	organic	solid	161.2	Combi-Blocks	2020-01-24	https://sds.chemicalsafety.com/sds/pda/msds/getpdf.ashx?action=msdsdocument&auth=200C200C200C200C2008207A200D2078200C200C200C200C200C200C200C200C200C2008&param1=ZmRwLjFfMzM5OTIxMTNORQ==&unique=1677494492&session=49305c2cf7bf8e5ab1ba6b83c8fc70df&hostname=139.28.41.7	2	2.5	0.707107	28.2843	3	0	2	1	0	0	1	1	warning	13	13.5
3-Aminocoumarin	1635-31-0	organic	solid	161.2	Thermo Fisher	2020-02-14	https://sds.chemicalsafety.com/sds/pda/msds/getpdf.ashx?action=msdsdocument&auth=200C200C200C200C2008207A200D2078200C200C200C200C200C200C200C200C200C2008&param1=ZmRwLjFfMDEyMjkyMTNORQ==&unique=1677494691&session=49305c2cf7bf8e5ab1ba6b83c8fc70df&hostname=139.28.41.7	3				4	1	2	1	0	0	1		warning	14
3-Chlorobenzoic acid	535-80-8	organic	solid	156.57	Sigma-Aldrich	2020-01-20	https://sds.chemicalsafety.com/sds/pda/msds/getpdf.ashx?action=msdsdocument&auth=200C200C200C200C2008207A200D2078200C200C200C200C200C200C200C200C200C2008&param1=ZmRwLjFfNDk4NzM2MDNORQ==&unique=1676977960&session=23742bc2319efd3fb56ee581bcf57170&hostname=139.28.41.7	1.5	2.25	1.06066	47.1405	2	0	2	0	0	0	1	1	warning	7	10.5
3-Chlorobenzoic acid	535-80-8	organic	solid	156.57	Thermo Fisher	2020-02-14	https://sds.chemicalsafety.com/sds/pda/msds/getpdf.ashx?action=msdsdocument&auth=200C200C200C200C2008207A200D2078200C200C200C200C200C200C200C200C200C2008&param1=ZmRwLjFfMTYxMDkyMTNORQ==&unique=1676978075&session=23742bc2319efd3fb56ee581bcf57170&hostname=139.28.41.7	3				4	1	2	1	0	0	1		warning	14
3-Methylbenzoic Acid	99-04-7	organic	solid	136.15	Sigma-Aldrich	2021-10-26	https://sds.chemicalsafety.com/sds/pda/msds/getpdf.ashx?action=msdsdocument&auth=200C200C200C200C2008207A200D2078200C200C200C200C200C200C200C200C200C2008&param1=ZmRwLjFfNjc5MjYwMDNORQ==&unique=1676978440&session=23742bc2319efd3fb56ee581bcf57170&hostname=139.28.41.7	0.75	0.875	0.176777	20.2031	1	0	1	0	0	0	1	1	warning	4	3.5
3-Methylbenzoic Acid	99-04-7	organic	solid	136.15	Thermo Fisher	2020-02-14	https://sds.chemicalsafety.com/sds/pda/msds/getpdf.ashx?action=msdsdocument&auth=200C200C200C200C2008207A200D2078200C200C200C200C200C200C200C200C200C2008&param1=ZmRwLjFfOTIwNDAzMTNORQ==&unique=1676978530&session=23742bc2319efd3fb56ee581bcf57170&hostname=139.28.41.7	1				1	1	0	0	0	0	1		danger	3
4-Hydroxycoumarin	1076-38-6	organic	solid	162.14	Sigma-Aldrich	2021-11-04	https://sds.chemicalsafety.com/sds/pda/msds/getpdf.ashx?action=msdsdocument&auth=200C200C200C200C2008207A200D2078200C200C200C200C200C200C200C200C200C2008&param1=ZmRwLjFfODY2OTQwMDNORQ==&unique=1677495312&session=49305c2cf7bf8e5ab1ba6b83c8fc70df&hostname=139.28.41.7	0.25	0.125	0.176777	141.421	1	0	0	0	1	0	1	0.5	warning	4	2
4-Hydroxycoumarin	1076-38-6	organic	solid	162.14	Thermo Fisher	2020-02-14	https://sds.chemicalsafety.com/sds/pda/msds/getpdf.ashx?action=msdsdocument&auth=200C200C200C200C2008207A200D2078200C200C200C200C200C200C200C200C200C2008&param1=ZmRwLjFfMzk0NTkyMTNORQ==&unique=1677495490&session=49305c2cf7bf8e5ab1ba6b83c8fc70df&hostname=139.28.41.7	0				0	0	0	0	0	0	0		none	0
4-Methylumbelliferone	90-33-5	organic	solid	176.17	Sigma-Aldrich	2022-04-28	https://sds.chemicalsafety.com/sds/pda/msds/getpdf.ashx?action=msdsdocument&auth=200C200C200C200C2008207A200D2078200C200C200C200C200C200C200C200C200C2008&param1=ZmRwLjFfMjgyMDUwMDNORQ==&unique=1676979459&session=23742bc2319efd3fb56ee581bcf57170&hostname=139.28.41.7	0	1.5	2.12132	141.421	0	0	0	0	0	0	0	0.5	none	0	7
4-Methylumbelliferone	90-33-5	organic	solid	176.17	Thermo Fisher	2020-02-14	https://sds.chemicalsafety.com/sds/pda/msds/getpdf.ashx?action=msdsdocument&auth=200C200C200C200C2008207A200D2078200C200C200C200C200C200C200C200C200C2008&param1=ZmRwLjFfNTI1NzkyMTNORQ==&unique=1676979567&session=23742bc2319efd3fb56ee581bcf57170&hostname=139.28.41.7	3				4	1	2	1	0	0	1		warning	14
6,7-Dihydroxycoumarin	305-01-1	organic	solid	178.14	Sigma-Aldrich	2021-10-27	https://sds.chemicalsafety.com/sds/pda/msds/getpdf.ashx?action=msdsdocument&auth=200C200C200C200C2008207A200D2078200C200C200C200C200C200C200C200C200C2008&param1=ZmRwLjFfMDY4NTAxMDNORQ==&unique=1677496172&session=49305c2cf7bf8e5ab1ba6b83c8fc70df&hostname=139.28.41.7	0	1.5	2.12132	141.421	0	0	0	0	0	0	0	0.5	none	0	7
6,7-Dihydroxycoumarin	305-01-1	organic	solid	178.14	Thermo Fisher	2020-02-14	https://sds.chemicalsafety.com/sds/pda/msds/getpdf.ashx?action=msdsdocument&auth=200C200C200C200C2008207A200D2078200C200C200C200C200C200C200C200C200C2008&param1=ZmRwLjFfNDI0NTkyMTNORQ==&unique=1677496273&session=49305c2cf7bf8e5ab1ba6b83c8fc70df&hostname=139.28.41.7	3				4	1	2	1	0	0	1		warning	14
7-Amino-4-(trifluoromethyl)coumarin	53518-15-3	organic	solid	229.16	Sigma-Aldrich	2021-01-14	https://sds.chemicalsafety.com/sds/pda/msds/getpdf.ashx?action=msdsdocument&auth=200C200C200C200C2008207A200D2078200C200C200C200C200C200C200C200C200C2008&param1=ZmRwLjFfMjQwNjgxMjNORQ==&unique=1677497425&session=49305c2cf7bf8e5ab1ba6b83c8fc70df&hostname=139.28.41.7	0	1.5	2.12132	141.421	0	0	0	0	0	0	0	0.5	none	0	7
7-Amino-4-(trifluoromethyl)coumarin	53518-15-3	organic	solid	229.16	Thermo Fisher	2020-02-14	https://sds.chemicalsafety.com/sds/pda/msds/getpdf.ashx?action=msdsdocument&auth=200C200C200C200C2008207A200D2078200C200C200C200C200C200C200C200C200C2008&param1=ZmRwLjFfOTY5ODkyMTNORQ==&unique=1677497515&session=49305c2cf7bf8e5ab1ba6b83c8fc70df&hostname=139.28.41.7	3				4	1	2	1	0	0	1		warning	14
7-Amino-4-methylcoumarin	26093-31-2	organic	solid	175.18	Sigma-Aldrich	2022-04-25	https://sds.chemicalsafety.com/sds/pda/msds/getpdf.ashx?action=msdsdocument&auth=200C200C200C200C2008207A200D2078200C200C200C200C200C200C200C200C200C2008&param1=ZmRwLjFfNzYwNTgyMjNORQ==&unique=1677497648&session=49305c2cf7bf8e5ab1ba6b83c8fc70df&hostname=139.28.41.7	0	1.5	2.12132	141.421	0	0	0	0	0	0	0	0.5	none	0	7
7-Amino-4-methylcoumarin	26093-31-2	organic	solid	175.18	Thermo Fisher	2022-07-04	https://sds.chemicalsafety.com/sds/pda/msds/getpdf.ashx?action=msdsdocument&auth=200C200C200C200C2008207A200D2078200C200C200C200C200C200C200C200C200C2008&param1=ZmRwLjFfMjY0ODkyMTNORQ==&unique=1677497751&session=49305c2cf7bf8e5ab1ba6b83c8fc70df&hostname=139.28.41.7	3				4	1	2	1	0	0	1		warning	14
7-Hydroxy-4-phenylcoumarin	2555-30-8	organic	solid	238.24	Sigma-Aldrich	2022-03-12	https://sds.chemicalsafety.com/sds/pda/msds/getpdf.ashx?action=msdsdocument&auth=200C200C200C200C2008207A200D2078200C200C200C200C200C200C200C200C200C2008&param1=ZmRwLjFfMDI5NDUwMDNORQ==&unique=1677497846&session=49305c2cf7bf8e5ab1ba6b83c8fc70df&hostname=139.28.41.7	0	1	1.41421	141.421	0	0	0	0	0	0	0	0.5	none	0	6.5
7-Hydroxy-4-phenylcoumarin	2555-30-8	organic	solid	238.24	Combi-Blocks	2022-10-05	https://sds.chemicalsafety.com/sds/pda/msds/getpdf.ashx?action=msdsdocument&auth=200C200C200C200C2008207A200D2078200C200C200C200C200C200C200C200C200C2008&param1=ZmRwLjFfMjkzNjU0MjNORQ==&unique=1677497925&session=49305c2cf7bf8e5ab1ba6b83c8fc70df&hostname=139.28.41.7	2				3	0	2	1	0	0	1		warning	13
Acetaminophen	103-90-2	organic	solid	151.16	Sigma-Aldrich	2022-09-06	https://sds.chemicalsafety.com/sds/pda/msds/getpdf.ashx?action=msdsdocument&auth=200C200C200C200C2008207A200D2078200C200C200C200C200C200C200C200C200C2008&param1=ZmRwLjFfMDg1MzQ2MDNORQ==&unique=1676990597&session=23742bc2319efd3fb56ee581bcf57170&hostname=139.28.41.7	0.25	0.25	0	0	1	0	0	0	1	0	1	1	warning	4	4.5
Acetaminophen	103-90-2	organic	solid	151.16	Thermo Fisher	2020-02-14	https://sds.chemicalsafety.com/sds/pda/msds/getpdf.ashx?action=msdsdocument&auth=200C200C200C200C2008207A200D2078200C200C200C200C200C200C200C200C200C2008&param1=ZmRwLjFfODg5MzkyMTNORQ==&unique=1676990785&session=23742bc2319efd3fb56ee581bcf57170&hostname=139.28.41.7	0.25				1	0	0	0	1	0	1		warning	5
Acetanisole	100-06-1	organic	solid	150.17	Sigma-Aldrich	2021-08-31	https://sds.chemicalsafety.com/sds/pda/msds/getpdf.ashx?action=msdsdocument&auth=200C200C200C200C2008207A200D2078200C200C200C200C200C200C200C200C200C2008&param1=ZmRwLjFfNTQwMTIyMjNORQ==&unique=1676992612&session=23742bc2319efd3fb56ee581bcf57170&hostname=139.28.41.7	0.25	1	1.06066	106.066	1	0	0	0	1	0	1	1	warning	4	7.5
Acetanisole	100-06-1	organic	solid	150.17	Thermo Fisher	2021-11-01	https://sds.chemicalsafety.com/sds/pda/msds/getpdf.ashx?action=msdsdocument&auth=200C200C200C200C2008207A200D2078200C200C200C200C200C200C200C200C200C2008&param1=ZmRwLjFfNzA2NTkyMTNORQ==&unique=1676992769&session=23742bc2319efd3fb56ee581bcf57170&hostname=139.28.41.7	1.75				3	0	2	0	1	0	1		warning	11
Acetic acid	64-19-7	organic	liquid	60.05	Sigma-Aldrich	2022-11-15	https://sds.chemicalsafety.com/sds/pda/msds/getpdf.ashx?action=msdsdocument&auth=200C200C200C200C2008207A200D2078200C200C200C200C200C200C200C200C200C2008&param1=ZmRwLjFfOTg3MTQxMjNORQ==&unique=1676992922&session=23742bc2319efd3fb56ee581bcf57170&hostname=139.28.41.7	2.5	2	0.707107	35.3553	3	2	0	1	0	0	2	2	danger	17	12
Acetic acid	64-19-7	organic	liquid	60.05	PANREAC QUIMICA S.L.U.	2020-02-13	https://sds.chemicalsafety.com/sds/pda/msds/getpdf.ashx?action=msdsdocument&auth=200C200C200C200C2008207A200D2078200C200C200C200C200C200C200C200C200C2008&param1=ZmRwLjFfMzE5Nzg1MDNORQ==&unique=1676993046&session=23742bc2319efd3fb56ee581bcf57170&hostname=139.28.41.7	1.5				2	1	0	1	0	0	2		danger	7
Acetylsalicylic acid	50-78-2	organic	solid	180.16	Sigma-Aldrich	2021-12-22	https://sds.chemicalsafety.com/sds/pda/msds/getpdf.ashx?action=msdsdocument&auth=200C200C200C200C2008207A200D2078200C200C200C200C200C200C200C200C200C2008&param1=ZmRwLjFfODQ1MjM3MDNORQ==&unique=1676994794&session=23742bc2319efd3fb56ee581bcf57170&hostname=139.28.41.7	0.25	0.25	0	0	1	0	0	0	1	0	1	1	warning	4	5
Acetylsalicylic acid	50-78-2	organic	solid	180.16	Thermo Fisher	2020-02-14	https://sds.chemicalsafety.com/sds/pda/msds/getpdf.ashx?action=msdsdocument&auth=200C200C200C200C2008207A200D2078200C200C200C200C200C200C200C200C200C2008&param1=ZmRwLjFfOTMyNjAzMTNORQ==&unique=1676994919&session=23742bc2319efd3fb56ee581bcf57170&hostname=139.28.41.7	0.25				1	0	0	0	1	0	1		warning	6
Acenocoumarol	152-72-7	organic	solid	353.33	Sigma-Aldrich	2021-08-31	https://sds.chemicalsafety.com/sds/pda/msds/getpdf.ashx?action=msdsdocument&auth=200C200C200C200C2008207A200D2078200C200C200C200C200C200C200C200C200C2008&param1=ZmRwLjFfODUyMTQxMDNORQ==&unique=1677007141&session=a3ab4df46ca5fb7ad16ab5a68cb3e706&hostname=139.28.41.7	2.25	1.125	1.59099	141.421	4	0	2	1	1	0	1	0.5	warning	15	7.5
Acenocoumarol	152-72-7	organic	solid	353.33	Combi-Blocks	2020-01-13	https://sds.chemicalsafety.com/sds/pda/msds/getpdf.ashx?action=msdsdocument&auth=200C200C200C200C2008207A200D2078200C200C200C200C200C200C200C200C200C2008&param1=ZmRwLjFfMTgwMzMwMTNORQ==&unique=1677007309&session=a3ab4df46ca5fb7ad16ab5a68cb3e706&hostname=139.28.41.7	0				0	0	0	0	0	0	0		none	0
Ammonium acetate	631-61-8	organic	solid	77.08	Sigma-Aldrich	2022-08-28	https://sds.chemicalsafety.com/sds/pda/msds/getpdf.ashx?action=msdsdocument&auth=200C200C200C200C2008207A200D2078200C200C200C200C200C200C200C200C200C2008&param1=ZmRwLjFfMDI4MTQxMjNORQ==&unique=1677067190&session=21623f89b354e08589e0ade18e06e2bb&hostname=139.28.41.7	0	0	0	0	0	0	0	0	0	0	0	0	none	0	0
Ammonium acetate	631-61-8	organic	solid	77.08	Thermo Fisher	2020-02-14	https://sds.chemicalsafety.com/sds/pda/msds/getpdf.ashx?action=msdsdocument&auth=200C200C200C200C2008207A200D2078200C200C200C200C200C200C200C200C200C2008&param1=ZmRwLjFfNDg1OTkyMTNORQ==&unique=1677067289&session=21623f89b354e08589e0ade18e06e2bb&hostname=139.28.41.7	0				0	0	0	0	0	0	0		none	0
Ammonium carbonate	506-87-6	inorganic	solid	96.09	Sigma-Aldrich	2022-11-15	https://sds.chemicalsafety.com/sds/pda/msds/getpdf.ashx?action=msdsdocument&auth=200C200C200C200C2008207A200D2078200C200C200C200C200C200C200C200C200C2008&param1=ZmRwLjFfMTc2ODE2MDNORQ==&unique=1677070993&session=6ea14deee4aa445e7572ca8b582550dc&hostname=139.28.41.7	0.25	0.25	0	0	1	0	0	0	1	0	1	1	warning	4	4.5
Ammonium carbonate	506-87-6	inorganic	solid	96.09	Thermo Fisher	2022-02-16	https://sds.chemicalsafety.com/sds/pda/msds/getpdf.ashx?action=msdsdocument&auth=200C200C200C200C2008207A200D2078200C200C200C200C200C200C200C200C200C2008&param1=ZmRwLjFfNjU1OTkyMTNORQ==&unique=1677071174&session=6ea14deee4aa445e7572ca8b582550dc&hostname=139.28.41.7	0.25				1	0	0	0	1	0	1		warning	5
Acetic anhydride	108-24-7	organic	liquid	102.09	Sigma-Aldrich	2021-06-01	https://sds.chemicalsafety.com/sds/pda/msds/getpdf.ashx?action=msdsdocument&auth=200C200C200C200C2008207A200D2078200C200C200C200C200C200C200C200C200C2008&param1=ZmRwLjJfMzM1NTUwMDNORQ==&unique=1677072493&session=6ea14deee4aa445e7572ca8b582550dc&hostname=139.28.41.7	3.5	3.5	0	0	5	2	1	1	1	0	3	3	danger	23	24
Acetic anhydride	108-24-7	organic	liquid	102.09	Thermo Fisher	2020-02-14	https://sds.chemicalsafety.com/sds/pda/msds/getpdf.ashx?action=msdsdocument&auth=200C200C200C200C2008207A200D2078200C200C200C200C200C200C200C200C200C2008&param1=ZmRwLjFfMjMxODkyMTNORQ==&unique=1677072618&session=6ea14deee4aa445e7572ca8b582550dc&hostname=139.28.41.7	3.5				5	2	1	1	1	0	3		danger	25
Atropine	51-55-8	organic	solid	289.37	Sigma-Aldrich	2022-02-17	https://sds.chemicalsafety.com/sds/pda/msds/getpdf.ashx?action=msdsdocument&auth=200C200C200C200C2008207A200D2078200C200C200C200C200C200C200C200C200C2008&param1=ZmRwLjFfMzU0MDQxMjNORQ==&unique=1677073643&session=6ea14deee4aa445e7572ca8b582550dc&hostname=139.28.41.7	1.5	1.5	0	0	2	0	2	0	0	0	1	1	danger	10	11
Atropine	51-55-8	organic	solid	289.37	Thermo Fisher	2020-02-14	https://sds.chemicalsafety.com/sds/pda/msds/getpdf.ashx?action=msdsdocument&auth=200C200C200C200C2008207A200D2078200C200C200C200C200C200C200C200C200C2008&param1=ZmRwLjFfODI2OTAzMTNORQ==&unique=1677073742&session=6ea14deee4aa445e7572ca8b582550dc&hostname=139.28.41.7	1.5				2	0	2	0	0	0	1		danger	12
β-Carotene	7235-40-7	organic	solid	536.87	Sigma-Aldrich	2022-04-12	https://sds.chemicalsafety.com/sds/pda/msds/getpdf.ashx?action=msdsdocument&auth=200C200C200C200C2008207A200D2078200C200C200C200C200C200C200C200C200C2008&param1=ZmRwLjFfODIyNDMwMDNORQ==&unique=1677107646&session=6ea14deee4aa445e7572ca8b582550dc&hostname=139.28.41.7	0	0	0	0	0	0	0	0	0	0	0	0	none	0	0
β-Carotene	7235-40-7	organic	solid	536.87	Thermo Fisher	2021-05-27	https://sds.chemicalsafety.com/sds/pda/msds/getpdf.ashx?action=msdsdocument&auth=200C200C200C200C2008207A200D2078200C200C200C200C200C200C200C200C200C2008&param1=ZmRwLjFfMzY0ODkyMTNORQ==&unique=1677107823&session=6ea14deee4aa445e7572ca8b582550dc&hostname=139.28.41.7	0				0	0	0	0	0	0	0		none	0
β-Cyclodextrin	7585-39-9	organic	solid	1134.98	Sigma-Aldrich	2022-09-08	https://sds.chemicalsafety.com/sds/pda/msds/getpdf.ashx?action=msdsdocument&auth=200C200C200C200C2008207A200D2078200C200C200C200C200C200C200C200C200C2008&param1=ZmRwLjFfODUzNTMwMDNORQ==&unique=1677107965&session=6ea14deee4aa445e7572ca8b582550dc&hostname=139.28.41.7	0	0	0	0	0	0	0	0	0	0	0	0	none	0	0
β-Cyclodextrin	7585-39-9	organic	solid	1134.98	Thermo Fisher	2020-02-14	https://sds.chemicalsafety.com/sds/pda/msds/getpdf.ashx?action=msdsdocument&auth=200C200C200C200C2008207A200D2078200C200C200C200C200C200C200C200C200C2008&param1=ZmRwLjFfMTc0ODkyMTNORQ==&unique=1677108090&session=6ea14deee4aa445e7572ca8b582550dc&hostname=139.28.41.7	0				0	0	0	0	0	0	0		none	0
Benzaldehyde	100-52-7	organic	liquid	106.12	Sigma-Aldrich	2022-03-10	https://sds.chemicalsafety.com/sds/pda/msds/getpdf.ashx?action=msdsdocument&auth=200C200C200C200C2008207A200D2078200C200C200C200C200C200C200C200C200C2008&param1=ZmRwLjJfOTk3NTgxMjNORQ==&unique=1677108348&session=6ea14deee4aa445e7572ca8b582550dc&hostname=139.28.41.7	4	4.375	0.53033	12.1218	8	0	3	2	3	0	1	1.5	warning	19	21
Benzaldehyde	100-52-7	organic	liquid	106.12	Thermo Fisher	2022-12-06	https://sds.chemicalsafety.com/sds/pda/msds/getpdf.ashx?action=msdsdocument&auth=200C200C200C200C2008207A200D2078200C200C200C200C200C200C200C200C200C2008&param1=ZmRwLjFfMTI3OTkyMTNORQ==&unique=1677108521&session=6ea14deee4aa445e7572ca8b582550dc&hostname=139.28.41.7	4.75				8	2	2	1	3	0	2		danger	23
Biphenyl	92-52-4	organic	solid	154.21	Sigma-Aldrich	2022-09-06	https://sds.chemicalsafety.com/sds/pda/msds/getpdf.ashx?action=msdsdocument&auth=200C200C200C200C2008207A200D2078200C200C200C200C200C200C200C200C200C2008&param1=ZmRwLjFfMjQxNjgxMjNORQ==&unique=1677149039&session=10158fc67466c96792c3f504b6473b73&hostname=139.28.41.7	4	3.5	0.707107	20.2031	5	2	2	1	0	0	2	1.5	warning	15	14.5
Biphenyl	92-52-4	organic	solid	154.21	Thermo Fisher	2020-02-14	https://sds.chemicalsafety.com/sds/pda/msds/getpdf.ashx?action=msdsdocument&auth=200C200C200C200C2008207A200D2078200C200C200C200C200C200C200C200C200C2008&param1=ZmRwLjFfNDA0MDAzMTNORQ==&unique=1677149161&session=10158fc67466c96792c3f504b6473b73&hostname=139.28.41.7	3				4	1	2	1	0	0	1		warning	14
Bromobenzene	108-86-1	organic	liquid	157.01	Sigma-Aldrich	2022-10-29	https://sds.chemicalsafety.com/sds/pda/msds/getpdf.ashx?action=msdsdocument&auth=200C200C200C200C2008207A200D2078200C200C200C200C200C200C200C200C200C2008&param1=ZmRwLjFfMTIxNzM2MDNORQ==&unique=1677149892&session=10158fc67466c96792c3f504b6473b73&hostname=139.28.41.7	2.75	2.375	0.53033	22.3297	4	0	3	1	0	0	3	2.5	warning	16	19.5
Bromobenzene	108-86-1	organic	liquid	157.01	Thermo Fisher	2020-02-14	https://sds.chemicalsafety.com/sds/pda/msds/getpdf.ashx?action=msdsdocument&auth=200C200C200C200C2008207A200D2078200C200C200C200C200C200C200C200C200C2008&param1=ZmRwLjFfMTQzMDAzMTNORQ==&unique=1677149976&session=10158fc67466c96792c3f504b6473b73&hostname=139.28.41.7	2				3	0	2	1	0	0	2		warning	23
CAPS	1135-40-6	organic	solid	221.32	Sigma-Aldrich	2022-10-19	https://sds.chemicalsafety.com/sds/pda/msds/getpdf.ashx?action=msdsdocument&auth=200C200C200C200C2008207A200D2078200C200C200C200C200C200C200C200C200C2008&param1=ZmRwLjFfOTc3ODgxMjNORQ==&unique=1677152000&session=10158fc67466c96792c3f504b6473b73&hostname=139.28.41.7	0	1.5	2.12132	141.421	0	0	0	0	0	0	0	0.5	none	0	7
CAPS	1135-40-6	organic	solid	221.32	Thermo Fisher	2020-02-14	https://sds.chemicalsafety.com/sds/pda/msds/getpdf.ashx?action=msdsdocument&auth=200C200C200C200C2008207A200D2078200C200C200C200C200C200C200C200C200C2008&param1=ZmRwLjFfMDkyOTkyMTNORQ==&unique=1677152098&session=10158fc67466c96792c3f504b6473b73&hostname=139.28.41.7	3				4	1	2	1	0	0	1		warning	14
CAPSO	73463-39-5	organic	solid	237.32	Sigma-Aldrich	2021-03-30	https://sds.chemicalsafety.com/sds/pda/msds/getpdf.ashx?action=msdsdocument&auth=200C200C200C200C2008207A200D2078200C200C200C200C200C200C200C200C200C2008&param1=ZmRwLjFfNDE5MTgwMDNORQ==&unique=1677152209&session=10158fc67466c96792c3f504b6473b73&hostname=139.28.41.7	0	0	0	0	0	0	0	0	0	0	0	0	none	0	0
CAPSO	73463-39-5	organic	solid	237.32	Thermo Fisher	2020-02-20	https://sds.chemicalsafety.com/sds/pda/msds/getpdf.ashx?action=msdsdocument&auth=200C200C200C200C2008207A200D2078200C200C200C200C200C200C200C200C200C2008&param1=ZmRwLjFfNDU5OTkyMTNORQ==&unique=1677152308&session=10158fc67466c96792c3f504b6473b73&hostname=139.28.41.7	0				0	0	0	0	0	0	0		none	0
Carbamazepine	298-46-4	organic	solid	236.27	Sigma-Aldrich	2022-10-29	https://sds.chemicalsafety.com/sds/pda/msds/getpdf.ashx?action=msdsdocument&auth=200C200C200C200C2008207A200D2078200C200C200C200C200C200C200C200C200C2008&param1=ZmRwLjFfMzMyMjYzMjNORQ==&unique=1677152465&session=10158fc67466c96792c3f504b6473b73&hostname=139.28.41.7	3.25	2.75	0.707107	25.713	5	2	0	2	1	0	2	2	danger	18	18
Carbamazepine	298-46-4	organic	solid	236.27	Thermo Fisher	2020-02-14	https://sds.chemicalsafety.com/sds/pda/msds/getpdf.ashx?action=msdsdocument&auth=200C200C200C200C2008207A200D2078200C200C200C200C200C200C200C200C200C2008&param1=ZmRwLjFfNzEyOTkyMTNORQ==&unique=1677152576&session=10158fc67466c96792c3f504b6473b73&hostname=139.28.41.7	2.25				3	2	0	0	1	0	2		danger	18
Carbamazepine 10,11-epoxide	36507-30-9	organic	solid	252.27	Sigma-Aldrich	2021-09-19	https://sds.chemicalsafety.com/sds/pda/msds/getpdf.ashx?action=msdsdocument&auth=200C200C200C200C2008207A200D2078200C200C200C200C200C200C200C200C200C2008&param1=ZmRwLjFfOTE3NTMwMDNORQ==&unique=1677152803&session=10158fc67466c96792c3f504b6473b73&hostname=139.28.41.7	1.5	0.75	1.06066	141.421	2	0	2	0	0	0	1	0.5	none	3	1.5
Carbamazepine 10,11-epoxide	36507-30-9	organic	solid	252.27	TCI America	2022-12-15	https://sds.chemicalsafety.com/sds/pda/msds/getpdf.ashx?action=msdsdocument&auth=200C200C200C200C2008207A200D2078200C200C200C200C200C200C200C200C200C2008&param1=ZmRwLjFfOTg1NDQ1MjNORQ==&unique=1677152879&session=10158fc67466c96792c3f504b6473b73&hostname=139.28.41.7	0				0	0	0	0	0	0	0		none	0
Cefaclor monohydrate	70356-03-5	organic	solid	385.8	Combi-Blocks	2020-01-29	https://sds.chemicalsafety.com/sds/pda/msds/getpdf.ashx?action=msdsdocument&auth=200C200C200C200C2008207A200D2078200C200C200C200C200C200C200C200C200C2008&param1=ZmRwLjFfMzc4NjIxMTNORQ==&unique=1677153762&session=10158fc67466c96792c3f504b6473b73&hostname=139.28.41.7	2	2	0	0	2	2	0	0	0	0	2	1.5	danger	10	10
Cefaclor monohydrate	70356-03-5	organic	solid	385.8	TCI America	2020-06-15	https://sds.chemicalsafety.com/sds/pda/msds/getpdf.ashx?action=msdsdocument&auth=200C200C200C200C2008207A200D2078200C200C200C200C200C200C200C200C200C2008&param1=ZmRwLjFfNTg2NzA1MjNORQ==&unique=1677153883&session=10158fc67466c96792c3f504b6473b73&hostname=139.28.41.7	2				2	2	0	0	0	0	1		danger
Cerium(IV) sulfate tetrahydrate	10294-42-5	inorganic	solid	404.30	Sigma-Aldrich	2021-11-26	https://sds.chemicalsafety.com/sds/pda/msds/getpdf.ashx?action=msdsdocument&auth=200C200C200C200C2008207A200D2078200C200C200C200C200C200C200C200C200C2008&param1=ZmRwLjFfNjY1NzUwMDNORQ==&unique=1677155937&session=10158fc67466c96792c3f504b6473b73&hostname=139.28.41.7	4	3	1.41421	47.1405	4	4	0	0	0	0	2	1.5	danger	13	13
Cerium(IV) sulfate tetrahydrate	10294-42-5	inorganic	solid	404.30	Combi-Blocks	2021-01-06	https://sds.chemicalsafety.com/sds/pda/msds/getpdf.ashx?action=msdsdocument&auth=200C200C200C200C2008207A200D2078200C200C200C200C200C200C200C200C200C2008&param1=ZmRwLjFfMTg3MTcxMTNORQ==&unique=1677156061&session=10158fc67466c96792c3f504b6473b73&hostname=139.28.41.7	2				3	0	2	1	0	0	1		warning	13
Chloroacetic acid	79-11-8	organic	solid	94.50	Sigma-Aldrich	2022-09-08	https://sds.chemicalsafety.com/sds/pda/msds/getpdf.ashx?action=msdsdocument&auth=200C200C200C200C2008207A200D2078200C200C200C200C200C200C200C200C200C2008&param1=ZmRwLjJfMjA5NTMwMDNORQ==&unique=1677156554&session=10158fc67466c96792c3f504b6473b73&hostname=139.28.41.7	5	5.5	0.707107	12.8565	7	3	0	4	0	0	4	3	danger	16	17.5
Chloroacetic acid	79-11-8	organic	solid	94.50	Thermo Fisher	2021-11-23	https://sds.chemicalsafety.com/sds/pda/msds/getpdf.ashx?action=msdsdocument&auth=200C200C200C200C2008207A200D2078200C200C200C200C200C200C200C200C200C2008&param1=ZmRwLjFfMjU3OTkyMTNORQ==&unique=1677156740&session=10158fc67466c96792c3f504b6473b73&hostname=139.28.41.7	6				8	4	0	4	0	0	2		danger	19
Chlorobenzene	108-90-7	organic	liquid	112.56	Sigma-Aldrich	2022-10-19	https://sds.chemicalsafety.com/sds/pda/msds/getpdf.ashx?action=msdsdocument&auth=200C200C200C200C2008207A200D2078200C200C200C200C200C200C200C200C200C2008&param1=ZmRwLjFfNzMyOTE0MDNORQ==&unique=1677156910&session=10158fc67466c96792c3f504b6473b73&hostname=139.28.41.7	3	2.25	1.06066	47.1405	5	0	3	1	1	0	3	2.5	warning	19	20
Chlorobenzene	108-90-7	organic	liquid	112.56	Thermo Fisher	2020-02-14	https://sds.chemicalsafety.com/sds/pda/msds/getpdf.ashx?action=msdsdocument&auth=200C200C200C200C2008207A200D2078200C200C200C200C200C200C200C200C200C2008&param1=ZmRwLjJfODI3OTAzMTNORQ==&unique=1677157060&session=10158fc67466c96792c3f504b6473b73&hostname=139.28.41.7	1.5				3	0	1	1	1	0	2		warning	21
Chlorotrimethylsilane	75-77-4	inorganic	liquid	108.64	Sigma-Aldrich	2021-06-01	https://sds.chemicalsafety.com/sds/pda/msds/getpdf.ashx?action=msdsdocument&auth=200C200C200C200C2008207A200D2078200C200C200C200C200C200C200C200C200C2008&param1=ZmRwLjJfMTk1NzAyMjNORQ==&unique=1677157778&session=10158fc67466c96792c3f504b6473b73&hostname=139.28.41.7	4	3.875	0.176777	4.56198	6	2	1	2	1	0	3	3	danger	22	23.5
Chlorotrimethylsilane	75-77-4	inorganic	liquid	108.64	Thermo Fisher	2020-02-14	https://sds.chemicalsafety.com/sds/pda/msds/getpdf.ashx?action=msdsdocument&auth=200C200C200C200C2008207A200D2078200C200C200C200C200C200C200C200C200C2008&param1=ZmRwLjFfMjc4ODkyMTNORQ==&unique=1677157892&session=10158fc67466c96792c3f504b6473b73&hostname=139.28.41.7	3.75				6	2	1	1	2	0	3		danger	25
Chlorpromazine hydrochloride	69-09-0	organic	solid	355.33	Sigma-Aldrich	2020-11-13	https://sds.chemicalsafety.com/sds/pda/msds/getpdf.ashx?action=msdsdocument&auth=200C200C200C200C2008207A200D2078200C200C200C200C200C200C200C200C200C2008&param1=ZmRwLjFfMDQ5NTMwMDNORQ==&unique=1677164960&session=10158fc67466c96792c3f504b6473b73&hostname=139.28.41.7	1.5	1.5	0	0	2	1	0	1	0	0	1	1	danger	10	11
Chlorpromazine hydrochloride	69-09-0	organic	solid	355.33	Thermo Fisher	2020-02-19	https://sds.chemicalsafety.com/sds/pda/msds/getpdf.ashx?action=msdsdocument&auth=200C200C200C200C2008207A200D2078200C200C200C200C200C200C200C200C200C2008&param1=ZmRwLjFfMDUxMDAzMTNORQ==&unique=1677165075&session=10158fc67466c96792c3f504b6473b73&hostname=139.28.41.7	1.5				2	1	0	1	0	0	1		danger	12
Citric acid	77-92-9	organic	solid, DES component	192.12	Sigma-Aldrich	2022-05-12	https://sds.chemicalsafety.com/sds/pda/msds/getpdf.ashx?action=msdsdocument&auth=200C200C200C200C2008207A200D2078200C200C200C200C200C200C200C200C200C2008&param1=ZmRwLjNfMjUwNjMwMDNORQ==&unique=1677165221&session=10158fc67466c96792c3f504b6473b73&hostname=139.28.41.7	1.25	1.75	0.707107	40.4061	2	0	1	1	0	0	1	1	warning	10	10.5
Citric acid	77-92-9	organic	solid, DES component	192.12	Thermo Fisher	2022-07-12	https://sds.chemicalsafety.com/sds/pda/msds/getpdf.ashx?action=msdsdocument&auth=200C200C200C200C2008207A200D2078200C200C200C200C200C200C200C200C200C2008&param1=ZmRwLjFfODk0ODkyMTNORQ==&unique=1677165328&session=10158fc67466c96792c3f504b6473b73&hostname=139.28.41.7	2.25				3	1	1	1	0	0	1		warning	11
Citric acid monohydrate	5949-29-1	organic	solid	210.14	Sigma-Aldrich	2022-10-19	https://sds.chemicalsafety.com/sds/pda/msds/getpdf.ashx?action=msdsdocument&auth=200C200C200C200C2008207A200D2078200C200C200C200C200C200C200C200C200C2008&param1=ZmRwLjFfNTk3NjM2MDNORQ==&unique=1677165454&session=10158fc67466c96792c3f504b6473b73&hostname=139.28.41.7	1.25	1	0.353553	35.3553	2	0	1	1	0	0	1	1	warning	10	7
Citric acid monohydrate	5949-29-1	organic	solid	210.14	PANREAC QUIMICA S.L.U.	2020-12-02	https://sds.chemicalsafety.com/sds/pda/msds/getpdf.ashx?action=msdsdocument&auth=200C200C200C200C2008207A200D2078200C200C200C200C200C200C200C200C200C2008&param1=ZmRwLjFfMDg4Nzg1MDNORQ==&unique=1677165583&session=10158fc67466c96792c3f504b6473b73&hostname=139.28.41.7	0.75				1	0	1	0	0	0	1		warning	4
Clarithromycin	81103-11-9	organic	solid	747.95	Sigma-Aldrich	2022-01-03	https://sds.chemicalsafety.com/sds/pda/msds/getpdf.ashx?action=msdsdocument&auth=200C200C200C200C2008207A200D2078200C200C200C200C200C200C200C200C200C2008&param1=ZmRwLjFfMDYwNjMwMDNORQ==&unique=1677165720&session=10158fc67466c96792c3f504b6473b73&hostname=139.28.41.7	0.25	0.25	0	0	1	0	0	0	1	0	1	1	warning	4	4.5
Clarithromycin	81103-11-9	organic	solid	747.95	Thermo Fisher	2020-03-11	https://sds.chemicalsafety.com/sds/pda/msds/getpdf.ashx?action=msdsdocument&auth=200C200C200C200C2008207A200D2078200C200C200C200C200C200C200C200C200C2008&param1=ZmRwLjFfODcyOTkyMTNORQ==&unique=1677165839&session=10158fc67466c96792c3f504b6473b73&hostname=139.28.41.7	0.25				1	0	0	0	1	0	1		warning	5
Clozapine	5786-21-0	organic	solid	326.82	Sigma-Aldrich	2021-07-29	https://sds.chemicalsafety.com/sds/pda/msds/getpdf.ashx?action=msdsdocument&auth=200C200C200C200C2008207A200D2078200C200C200C200C200C200C200C200C200C2008&param1=ZmRwLjFfOTI3MTYzMjNORQ==&unique=1677166968&session=10158fc67466c96792c3f504b6473b73&hostname=139.28.41.7	2.75	3.875	1.59099	41.0578	4	0	3	1	0	0	2	2	danger	9	14.5
Clozapine	5786-21-0	organic	solid	326.82	Thermo Fisher	2020-02-19	https://sds.chemicalsafety.com/sds/pda/msds/getpdf.ashx?action=msdsdocument&auth=200C200C200C200C2008207A200D2078200C200C200C200C200C200C200C200C200C2008&param1=ZmRwLjFfNTM5ODkyMTNORQ==&unique=1677167089&session=10158fc67466c96792c3f504b6473b73&hostname=139.28.41.7	5				7	1	4	2	0	0	2		danger	20
Copper(I) bromide	7787-70-4	inorganic	solid	143.45	Sigma-Aldrich	2021-10-19	https://sds.chemicalsafety.com/sds/pda/msds/getpdf.ashx?action=msdsdocument&auth=200C200C200C200C2008207A200D2078200C200C200C200C200C200C200C200C200C2008&param1=ZmRwLjFfODQzNDk2MDNORQ==&unique=1677167233&session=10158fc67466c96792c3f504b6473b73&hostname=139.28.41.7	4.25	3.125	1.59099	50.9117	6	3	1	0	2	0	3	2	danger	11	11
Copper(I) bromide	7787-70-4	inorganic	solid	143.45	TCI America	2021-10-15	https://sds.chemicalsafety.com/sds/pda/msds/getpdf.ashx?action=msdsdocument&auth=200C200C200C200C2008207A200D2078200C200C200C200C200C200C200C200C200C2008&param1=ZmRwLjFfNjc0NTA1MjNORQ==&unique=1677167364&session=10158fc67466c96792c3f504b6473b73&hostname=139.28.41.7	2				3	0	2	1	0	0	1		warning
Copper(I) iodide	7681-65-4	inorganic	solid	190.45	Sigma-Aldrich	2020-09-30	https://sds.chemicalsafety.com/sds/pda/msds/getpdf.ashx?action=msdsdocument&auth=200C200C200C200C2008207A200D2078200C200C200C200C200C200C200C200C200C2008&param1=ZmRwLjFfNjE4MTQxMjNORQ==&unique=1677167524&session=10158fc67466c96792c3f504b6473b73&hostname=139.28.41.7	5	5.5	0.707107	12.8565	6	4	1	0	1	0	3	3.5	danger	13	13
Copper(I) iodide	7681-65-4	inorganic	solid	190.45	TCI America	2021-08-12	https://sds.chemicalsafety.com/sds/pda/msds/getpdf.ashx?action=msdsdocument&auth=200C200C200C200C2008207A200D2078200C200C200C200C200C200C200C200C200C2008&param1=ZmRwLjFfMzM2ODA1MjNORQ==&unique=1677167628&session=10158fc67466c96792c3f504b6473b73&hostname=139.28.41.7	6				8	3	3	1	1	0	4		danger
Deltamethrin	52918-63-5	organic	solid	505.20	Sigma-Aldrich	2022-05-06	https://sds.chemicalsafety.com/sds/pda/msds/getpdf.ashx?action=msdsdocument&auth=200C200C200C200C2008207A200D2078200C200C200C200C200C200C200C200C200C2008&param1=ZmRwLjFfOTIwNDgxMjNORQ==&unique=1677498942&session=49305c2cf7bf8e5ab1ba6b83c8fc70df&hostname=139.28.41.7	3	3.25	0.353553	10.8786	4	2	0	2	0	0	2	2	danger	11	12.5
Deltamethrin	52918-63-5	organic	solid	505.20	Combi-Blocks	2020-01-29	https://sds.chemicalsafety.com/sds/pda/msds/getpdf.ashx?action=msdsdocument&auth=200C200C200C200C2008207A200D2078200C200C200C200C200C200C200C200C200C2008&param1=ZmRwLjFfOTQ2OTAxMTNORQ==&unique=1677499046&session=49305c2cf7bf8e5ab1ba6b83c8fc70df&hostname=139.28.41.7	3.5				5	2	1	1	1	0	2		danger	14
Desmethyldiazepam	1088-11-5	organic	solid	270.71	Sigma-Aldrich	2020-08-10	https://sds.chemicalsafety.com/sds/pda/msds/getpdf.ashx?action=msdsdocument&auth=200C200C200C200C2008207A200D2078200C200C200C200C200C200C200C200C200C2008&param1=ZmRwLjFfNzYzMjgwMDNORQ==&unique=1677499469&session=49305c2cf7bf8e5ab1ba6b83c8fc70df&hostname=139.28.41.7	0.25	0.75	0.707107	94.2809	1	0	0	0	1	0	1	1.5	warning	4	4
Desmethyldiazepam	1088-11-5	organic	solid	270.71	U. S. Pharmacopeia	2022-10-28	https://sds.chemicalsafety.com/sds/pda/msds/getpdf.ashx?action=msdsdocument&auth=200C200C200C200C2008207A200D2078200C200C200C200C200C200C200C200C200C2008&param1=ZmRwLjFfMTc5NzQ1MjNORQ==&unique=1677499595&session=49305c2cf7bf8e5ab1ba6b83c8fc70df&hostname=139.28.41.7	1.25				2	0	1	1	0	0	2		warning
Dichlorodimethylsilane	75-78-5	organic	liquid	129.06	Sigma-Aldrich	2020-12-18	https://sds.chemicalsafety.com/sds/pda/msds/getpdf.ashx?action=msdsdocument&auth=200C200C200C200C2008207A200D2078200C200C200C200C200C200C200C200C200C2008&param1=ZmRwLjJfNDYxNTgxMjNORQ==&unique=1676980233&session=23742bc2319efd3fb56ee581bcf57170&hostname=139.28.41.7	4	4.5	0.707107	15.7135	6	2	1	2	1	0	4	3.5	danger	22	22.5
Dichlorodimethylsilane	75-78-5	organic	liquid	129.06	Thermo Fisher	2020-02-14	https://sds.chemicalsafety.com/sds/pda/msds/getpdf.ashx?action=msdsdocument&auth=200C200C200C200C2008207A200D2078200C200C200C200C200C200C200C200C200C2008&param1=ZmRwLjFfNDQxMDAzMTNORQ==&unique=1676980697&session=23742bc2319efd3fb56ee581bcf57170&hostname=139.28.41.7	5				7	3	1	2	1	0	3		danger	23
Diethyl malonate	105-53-3	organic	liquid	160.17	Sigma-Aldrich	2022-03-08	https://sds.chemicalsafety.com/sds/pda/msds/getpdf.ashx?action=msdsdocument&auth=200C200C200C200C2008207A200D2078200C200C200C200C200C200C200C200C200C2008&param1=ZmRwLjJfOTk3MTQxMjNORQ==&unique=1677500659&session=49305c2cf7bf8e5ab1ba6b83c8fc70df&hostname=139.28.41.7	1.5	0.875	0.883883	101.015	3	0	1	1	1	0	1	0.5	warning	9	7
Diethyl malonate	105-53-3	organic	liquid	160.17	Thermo Fisher	2021-07-23	https://sds.chemicalsafety.com/sds/pda/msds/getpdf.ashx?action=msdsdocument&auth=200C200C200C200C2008207A200D2078200C200C200C200C200C200C200C200C200C2008&param1=ZmRwLjFfNDc0MDAzMTNORQ==&unique=1677500758&session=49305c2cf7bf8e5ab1ba6b83c8fc70df&hostname=139.28.41.7	0.25				1	0	0	0	1	0	0		warning	5
Diethylamine	109-89-7	organic	liquid	73.14	Sigma-Aldrich	2022-08-27	https://sds.chemicalsafety.com/sds/pda/msds/getpdf.ashx?action=msdsdocument&auth=200C200C200C200C2008207A200D2078200C200C200C200C200C200C200C200C200C2008&param1=ZmRwLjFfMzYwOTUwMDNORQ==&unique=1677500884&session=49305c2cf7bf8e5ab1ba6b83c8fc70df&hostname=139.28.41.7	4.75	5	0.353553	7.07107	8	2	1	3	2	0	4	3.5	danger	23	23
Diethylamine	109-89-7	organic	liquid	73.14	Thermo Fisher	2020-02-14	https://sds.chemicalsafety.com/sds/pda/msds/getpdf.ashx?action=msdsdocument&auth=200C200C200C200C2008207A200D2078200C200C200C200C200C200C200C200C200C2008&param1=ZmRwLjFfNTExMTAzMTNORQ==&unique=1677501026&session=49305c2cf7bf8e5ab1ba6b83c8fc70df&hostname=139.28.41.7	5.25				8	3	1	2	2	0	3		danger	23
Dihydrocoumarin	119-84-6	organic	liquid	148.16	Sigma-Aldrich	2022-01-09	https://sds.chemicalsafety.com/sds/pda/msds/getpdf.ashx?action=msdsdocument&auth=200C200C200C200C2008207A200D2078200C200C200C200C200C200C200C200C200C2008&param1=ZmRwLjFfNzIxOTUwMDNORQ==&unique=1677532713&session=f99c59d06bf130d9b71feb3ce96b8ec3&hostname=139.28.41.7	1.25	1.5	0.353553	23.5702	2	1	0	0	1	0	1	1	warning	10	10.5
Dihydrocoumarin	119-84-6	organic	liquid	148.16	Thermo Fisher	2020-02-14	https://sds.chemicalsafety.com/sds/pda/msds/getpdf.ashx?action=msdsdocument&auth=200C200C200C200C2008207A200D2078200C200C200C200C200C200C200C200C200C2008&param1=ZmRwLjFfNzU4MzAzMTNORQ==&unique=1677532802&session=f99c59d06bf130d9b71feb3ce96b8ec3&hostname=139.28.41.7	1.75				3	0	2	0	1	0	1		warning	11
Dodecane	112-40-3	organic	liquid	170.33	Sigma-Aldrich	2022-08-27	https://sds.chemicalsafety.com/sds/pda/msds/getpdf.ashx?action=msdsdocument&auth=200C200C200C200C2008207A200D2078200C200C200C200C200C200C200C200C200C2008&param1=ZmRwLjFfNjY2MjgwMDNORQ==&unique=1677533648&session=f99c59d06bf130d9b71feb3ce96b8ec3&hostname=139.28.41.7	1.25	1.25	0	0	2	1	0	0	1	0	1	1	danger	8	8
Dodecane	112-40-3	organic	liquid	170.33	Thermo Fisher	2022-06-14	https://sds.chemicalsafety.com/sds/pda/msds/getpdf.ashx?action=msdsdocument&auth=200C200C200C200C2008207A200D2078200C200C200C200C200C200C200C200C200C2008&param1=ZmRwLjFfMjgwNDAzMTNORQ==&unique=1677533807&session=f99c59d06bf130d9b71feb3ce96b8ec3&hostname=139.28.41.7	1.25				2	1	0	0	1	0	1		danger	8
Dodecyltrimethylammonium bromide	1119-94-4	organic	solid	308.34	Sigma-Aldrich	2022-09-06	https://sds.chemicalsafety.com/sds/pda/msds/getpdf.ashx?action=msdsdocument&auth=200C200C200C200C2008207A200D2078200C200C200C200C200C200C200C200C200C2008&param1=ZmRwLjFfNzQ3NjgxMjNORQ==&unique=1677533913&session=f99c59d06bf130d9b71feb3ce96b8ec3&hostname=139.28.41.7	4	3.625	0.53033	14.6298	5	2	2	1	0	0	3	2	danger	13	15
Dodecyltrimethylammonium bromide	1119-94-4	organic	solid	308.34	Thermo Fisher	2020-02-14	https://sds.chemicalsafety.com/sds/pda/msds/getpdf.ashx?action=msdsdocument&auth=200C200C200C200C2008207A200D2078200C200C200C200C200C200C200C200C200C2008&param1=ZmRwLjFfNTA3MDEzMTNORQ==&unique=1677534002&session=f99c59d06bf130d9b71feb3ce96b8ec3&hostname=139.28.41.7	3.25				5	1	2	1	1	0	1		warning	17
Eosin Y disodium salt	17372-87-1	organic	solid	691.85	Sigma-Aldrich	2021-04-29	https://sds.chemicalsafety.com/sds/pda/msds/getpdf.ashx?action=msdsdocument&auth=200C200C200C200C2008207A200D2078200C200C200C200C200C200C200C200C200C2008&param1=ZmRwLjFfNTk5MTcwMDNORQ==&unique=1677535506&session=f99c59d06bf130d9b71feb3ce96b8ec3&hostname=139.28.41.7	2.25	1.5	1.06066	70.7107	3	1	1	1	0	0	1	1	warning	11	7.5
Eosin Y disodium salt	17372-87-1	organic	solid	691.85	Combi-Blocks	2020-10-01	https://sds.chemicalsafety.com/sds/pda/msds/getpdf.ashx?action=msdsdocument&auth=200C200C200C200C2008207A200D2078200C200C200C200C200C200C200C200C200C2008&param1=ZmRwLjFfMTc1MTYxMTNORQ==&unique=1677535599&session=f99c59d06bf130d9b71feb3ce96b8ec3&hostname=139.28.41.7	0.75				1	0	1	0	0	0	1		warning	4
Ferric chloride	7705-08-0	inorganic	solid	162.20	Sigma-Aldrich	2022-11-08	https://sds.chemicalsafety.com/sds/pda/msds/getpdf.ashx?action=msdsdocument&auth=200C200C200C200C2008207A200D2078200C200C200C200C200C200C200C200C200C2008&param1=ZmRwLjFfMjg5MjMzMjNORQ==&unique=1677618484&session=2769514b688cb754cd0d8f1507d36947&hostname=139.28.41.7	3	3	0	0	4	2	1	0	1	0	2	2	danger	12	11.5
Ferric chloride	7705-08-0	inorganic	solid	162.20	Combi-Blocks	2023-01-02	https://sds.chemicalsafety.com/sds/pda/msds/getpdf.ashx?action=msdsdocument&auth=200C200C200C200C2008207A200D2078200C200C200C200C200C200C200C200C200C2008&param1=ZmRwLjFfMjg3NzUxMTNORQ==&unique=1677618579&session=2769514b688cb754cd0d8f1507d36947&hostname=139.28.41.7	3				4	2	1	0	1	0	2		danger	11
Fluorescein isothiocyanate isomer I	3326-32-7	organic	solid	389.38	Sigma-Aldrich	2021-07-29	https://sds.chemicalsafety.com/sds/pda/msds/getpdf.ashx?action=msdsdocument&auth=200C200C200C200C2008207A200D2078200C200C200C200C200C200C200C200C200C2008&param1=ZmRwLjFfODU3MzgxMjNORQ==&unique=1677618797&session=2769514b688cb754cd0d8f1507d36947&hostname=139.28.41.7	2	2	0	0	2	2	0	0	0	0	1	1.5	danger	10	10
Fluorescein isothiocyanate isomer I	3326-32-7	organic	solid	389.38	Combi-Blocks	2023-01-02	https://sds.chemicalsafety.com/sds/pda/msds/getpdf.ashx?action=msdsdocument&auth=200C200C200C200C2008207A200D2078200C200C200C200C200C200C200C200C200C2008&param1=ZmRwLjFfMTgxODkwMTNORQ==&unique=1677618886&session=2769514b688cb754cd0d8f1507d36947&hostname=139.28.41.7	2				2	2	0	0	0	0	2		danger	10
Fluorescein sodium salt	518-47-8	organic	solid	376.27	Sigma-Aldrich	2022-02-18	https://sds.chemicalsafety.com/sds/pda/msds/getpdf.ashx?action=msdsdocument&auth=200C200C200C200C2008207A200D2078200C200C200C200C200C200C200C200C200C2008&param1=ZmRwLjFfODg0ODgwMDNORQ==&unique=1677619014&session=2769514b688cb754cd0d8f1507d36947&hostname=139.28.41.7	0	0	0	0	0	0	0	0	0	0	0	0	none	0	0
Fluorescein sodium salt	518-47-8	organic	solid	376.27	Combi-Blocks	2023-01-02	https://sds.chemicalsafety.com/sds/pda/msds/getpdf.ashx?action=msdsdocument&auth=200C200C200C200C2008207A200D2078200C200C200C200C200C200C200C200C200C2008&param1=ZmRwLjFfNzIwMjYxMTNORQ==&unique=1677619100&session=2769514b688cb754cd0d8f1507d36947&hostname=139.28.41.7	0				0	0	0	0	0	0	0		none	0
Formic acid	64-18-6	organic	liquid	46.03	Sigma-Aldrich	2022-08-18	https://sds.chemicalsafety.com/sds/pda/msds/getpdf.ashx?action=msdsdocument&auth=200C200C200C200C2008207A200D2078200C200C200C200C200C200C200C200C200C2008&param1=ZmRwLjFfNzcwNzc2MDNORQ==&unique=1677619411&session=2769514b688cb754cd0d8f1507d36947&hostname=139.28.41.7	3.25	3.25	0	0	5	2	0	2	1	0	3	3	danger	22	22
Formic acid	64-18-6	organic	liquid	46.03	U. S. Pharmacopeia	2021-09-24	https://sds.chemicalsafety.com/sds/pda/msds/getpdf.ashx?action=msdsdocument&auth=200C200C200C200C2008207A200D2078200C200C200C200C200C200C200C200C200C2008&param1=ZmRwLjFfNDE5NjQ1MjNORQ==&unique=1677619503&session=2769514b688cb754cd0d8f1507d36947&hostname=139.28.41.7	3.25				5	2	0	2	1	0	3		danger
Hexyl hexanoate	6378-65-0	organic	liquid	200.32	Sigma-Aldrich	2022-04-28	https://sds.chemicalsafety.com/sds/pda/msds/getpdf.ashx?action=msdsdocument&auth=200C200C200C200C2008207A200D2078200C200C200C200C200C200C200C200C200C2008&param1=ZmRwLjFfMzI5NTgxMjNORQ==&unique=1677620532&session=2769514b688cb754cd0d8f1507d36947&hostname=139.28.41.7	0	0	0	0	0	0	0	0	0	0	0	0	none	0	0
Hexyl hexanoate	6378-65-0	organic	liquid	200.32	Combi-Blocks	2023-01-02	https://sds.chemicalsafety.com/sds/pda/msds/getpdf.ashx?action=msdsdocument&auth=200C200C200C200C2008207A200D2078200C200C200C200C200C200C200C200C200C2008&param1=ZmRwLjFfNzMxMTcxMTNORQ==&unique=1677620594&session=2769514b688cb754cd0d8f1507d36947&hostname=139.28.41.7	0				0	0	0	0	0	0	0		none	0
Lithium acetate	546-89-4	organic	solid	65.99	Sigma-Aldrich	2021-08-04	https://sds.chemicalsafety.com/sds/pda/msds/getpdf.ashx?action=msdsdocument&auth=200C200C200C200C2008207A200D2078200C200C200C200C200C200C200C200C200C2008&param1=ZmRwLjFfMDM0Njc2MDNORQ==&unique=1677668483&session=cee9c3e3124a7c78e3d61a62e6a5f1a2&hostname=139.28.41.7	1.5	1.125	0.53033	47.1405	3	0	1	1	1	0	1	1	warning	8	6
Lithium acetate	546-89-4	organic	solid	65.99	Combi-Blocks	2023-01-02	https://sds.chemicalsafety.com/sds/pda/msds/getpdf.ashx?action=msdsdocument&auth=200C200C200C200C2008207A200D2078200C200C200C200C200C200C200C200C200C2008&param1=ZmRwLjFfMDA3NDUxMTNORQ==&unique=1677668586&session=cee9c3e3124a7c78e3d61a62e6a5f1a2&hostname=139.28.41.7	0.75				1	0	1	0	0	0	1		warning	4
Mesitylene	108-67-8	organic	liquid	120.19	Sigma-Aldrich	2021-10-26	https://sds.chemicalsafety.com/sds/pda/msds/getpdf.ashx?action=msdsdocument&auth=200C200C200C200C2008207A200D2078200C200C200C200C200C200C200C200C200C2008&param1=ZmRwLjNfMzQxMzYwMDNORQ==&unique=1676926823&session=9c1a704466e3bae6447bfa7b329f5889&hostname=78.8.217.118	4.25	4.375	0.176777	4.04061	7	1	2	3	1	0	4	3.5	danger	23	23.5
Mesitylene	108-67-8	organic	liquid	120.19	Thermo Fisher	2023-01-31	https://sds.chemicalsafety.com/sds/pda/msds/getpdf.ashx?action=msdsdocument&auth=200C200C200C200C2008207A200D2078200C200C200C200C200C200C200C200C200C2008&param1=ZmRwLjFfMzMzMTAzMTNORQ==&unique=1676926825&session=9c1a704466e3bae6447bfa7b329f5889&hostname=78.8.217.118	4.5				6	2	2	2	0	0	3		danger	24
Methyl Blue	28983-56-4	organic	solid	799.80	Sigma-Aldrich	2020-02-27	https://sds.chemicalsafety.com/sds/pda/msds/getpdf.ashx?action=msdsdocument&auth=200C200C200C200C2008207A200D2078200C200C200C200C200C200C200C200C200C2008&param1=ZmRwLjJfMzI5MTQxMjNORQ==&unique=1677444132&session=bdf11b8600b42b0c2a10febd77821c6b&hostname=78.8.217.118	0	1.5	2.12132	141.421	0	0	0	0	0	0	0	0.5	none	0	7
Methyl Blue	28983-56-4	organic	solid	799.80	Thermo Fisher	2020-02-14	https://sds.chemicalsafety.com/sds/pda/msds/getpdf.ashx?action=msdsdocument&auth=200C200C200C200C2008207A200D2078200C200C200C200C200C200C200C200C200C2008&param1=ZmRwLjFfNzQyMTAzMTNORQ==&unique=1677444132&session=bdf11b8600b42b0c2a10febd77821c6b&hostname=78.8.217.118	3				4	1	2	1	0	0	1		warning	14
Methyl cinnamate	103-26-4	organic	solid	162.19	Sigma-Aldrich	2022-10-02	https://sds.chemicalsafety.com/sds/pda/msds/getpdf.ashx?action=msdsdocument&auth=200C200C200C200C2008207A200D2078200C200C200C200C200C200C200C200C200C2008&param1=ZmRwLjJfNDY5MzYwMDNORQ==&unique=1676929458&session=9c1a704466e3bae6447bfa7b329f5889&hostname=78.8.217.118	1.75	0.875	1.23744	141.421	2	1	1	0	0	0	1	0.5	warning	8	4
Methyl cinnamate	103-26-4	organic	solid	162.19	Thermo Fisher	2020-02-14	https://sds.chemicalsafety.com/sds/pda/msds/getpdf.ashx?action=msdsdocument&auth=200C200C200C200C2008207A200D2078200C200C200C200C200C200C200C200C200C2008&param1=ZmRwLjFfNTI2MTAzMTNORQ==&unique=1676929614&session=9c1a704466e3bae6447bfa7b329f5889&hostname=78.8.217.118	0				0	0	0	0	0	0	0		none	0
Methyl-beta-cyclodextrin	128446-36-6	organic	solid	1303.3	Thermo Fisher	2022-04-05	https://sds.chemicalsafety.com/sds/pda/msds/getpdf.ashx?action=msdsdocument&auth=200C200C200C200C2008207A200D2078200C200C200C200C200C200C200C200C200C2008&param1=ZmRwLjFfMjgxMTAzMTNORQ==&unique=1676931223&session=9c1a704466e3bae6447bfa7b329f5889&hostname=78.8.217.118	1.75	0.875	1.23744	141.421	2	1	1	0	0	0	1	0.5	warning	12	6
Methyl-beta-cyclodextrin	128446-36-6	organic	solid	1303.3	Sigma-Aldrich	2022-04-28	https://sds.chemicalsafety.com/sds/pda/msds/getpdf.ashx?action=msdsdocument&auth=200C200C200C200C2008207A200D2078200C200C200C200C200C200C200C200C200C2008&param1=ZmRwLjFfNTk1MzMzMjNORQ==&unique=1676931226&session=9c1a704466e3bae6447bfa7b329f5889&hostname=78.8.217.118	0				0	0	0	0	0	0	0		none	0
N,N,N′,N′-Tetramethylethylenediamine	110-18-9	organic	liquid	116.20	Sigma-Aldrich	2021-06-24	https://sds.chemicalsafety.com/sds/pda/msds/getpdf.ashx?action=msdsdocument&auth=200C200C200C200C2008207A200D2078200C200C200C200C200C200C200C200C200C2008&param1=ZmRwLjFfNDA5ODM2MDNORQ==&unique=1677006944&session=7e72ee6b9a74e6f21cae92cd484df72a&hostname=78.8.217.118	4.25	4.5	0.353553	7.85674	6	2	1	3	0	0	3	3	danger	23	23
N,N,N′,N′-Tetramethylethylenediamine	110-18-9	organic	liquid	116.20	Thermo Fisher	2020-02-14	https://sds.chemicalsafety.com/sds/pda/msds/getpdf.ashx?action=msdsdocument&auth=200C200C200C200C2008207A200D2078200C200C200C200C200C200C200C200C200C2008&param1=ZmRwLjFfOTI1NDAzMTNORQ==&unique=1677006948&session=7e72ee6b9a74e6f21cae92cd484df72a&hostname=78.8.217.118	4.75				7	3	1	1	2	0	3		danger	23
Ninhydrin	485-47-2	organic	solid	178.14	Sigma-Aldrich	2021-09-11	https://sds.chemicalsafety.com/sds/pda/msds/getpdf.ashx?action=msdsdocument&auth=200C200C200C200C2008207A200D2078200C200C200C200C200C200C200C200C200C2008&param1=ZmRwLjFfNTkzNjYwMDNORQ==&unique=1677008927&session=7e72ee6b9a74e6f21cae92cd484df72a&hostname=78.8.217.118	1.75	2.5	1.06066	42.4264	3	0	2	0	1	0	1	1	warning	10	13.5
Ninhydrin	485-47-2	organic	solid	178.14	Thermo Fisher	2020-02-14	https://sds.chemicalsafety.com/sds/pda/msds/getpdf.ashx?action=msdsdocument&auth=200C200C200C200C2008207A200D2078200C200C200C200C200C200C200C200C200C2008&param1=ZmRwLjFfNzcwNjAzMTNORQ==&unique=1677008929&session=7e72ee6b9a74e6f21cae92cd484df72a&hostname=78.8.217.118	3.25				5	1	2	1	1	0	1		warning	17
Nortriptyline hydrochloride	894-71-3	organic	solid	299.84	Combi-Blocks	2021-04-29	https://sds.chemicalsafety.com/sds/pda/msds/getpdf.ashx?action=msdsdocument&auth=200C200C200C200C2008207A200D2078200C200C200C200C200C200C200C200C200C2008&param1=ZmRwLjFfNjI1OTYxMTNORQ==&unique=1677013189&session=7e72ee6b9a74e6f21cae92cd484df72a&hostname=78.8.217.118	0.25	0.25	0	0	1	0	0	0	1	0	1	1	warning	4	4.5
Nortriptyline hydrochloride	894-71-3	organic	solid	299.84	Sigma-Aldrich	2022-10-29	https://sds.chemicalsafety.com/sds/pda/msds/getpdf.ashx?action=msdsdocument&auth=200C200C200C200C2008207A200D2078200C200C200C200C200C200C200C200C200C2008&param1=ZmRwLjFfMTU2MjQzMjNORQ==&unique=1677013194&session=7e72ee6b9a74e6f21cae92cd484df72a&hostname=78.8.217.118	0.25				1	0	0	0	1	0	1		warning	5
p-Anisaldehyde	123-11-5	organic	liquid	136.15	Sigma-Aldrich	2021-09-02	https://sds.chemicalsafety.com/sds/pda/msds/getpdf.ashx?action=msdsdocument&auth=200C200C200C200C2008207A200D2078200C200C200C200C200C200C200C200C200C2008&param1=ZmRwLjJfMzE3MzgxMjNORQ==&unique=1677014255&session=7e72ee6b9a74e6f21cae92cd484df72a&hostname=78.8.217.118	1	1.375	0.53033	38.5695	2	0	0	2	0	0	0	0.5	none	2	2
p-Anisaldehyde	123-11-5	organic	liquid	136.15	U. S. Pharmacopeia	2020-05-19	https://sds.chemicalsafety.com/sds/pda/msds/getpdf.ashx?action=msdsdocument&auth=200C200C200C200C2008207A200D2078200C200C200C200C200C200C200C200C200C2008&param1=ZmRwLjFfNjc5NjQ1MjNORQ==&unique=1677014260&session=7e72ee6b9a74e6f21cae92cd484df72a&hostname=78.8.217.118	1.75				3	0	2	0	1	0	1		warning
p-Cresol	106-44-5	organic	solid	108.14	Sigma-Aldrich	2021-10-07	https://sds.chemicalsafety.com/sds/pda/msds/getpdf.ashx?action=msdsdocument&auth=200C200C200C200C2008207A200D2078200C200C200C200C200C200C200C200C200C2008&param1=ZmRwLjFfMjkyNTgwMDNORQ==&unique=1677014568&session=7e72ee6b9a74e6f21cae92cd484df72a&hostname=78.8.217.118	3.75	4.125	0.53033	12.8565	5	2	1	2	0	0	2	2	danger	13	14
p-Cresol	106-44-5	organic	solid	108.14	Thermo Fisher	2022-06-30	https://sds.chemicalsafety.com/sds/pda/msds/getpdf.ashx?action=msdsdocument&auth=200C200C200C200C2008207A200D2078200C200C200C200C200C200C200C200C200C2008&param1=ZmRwLjFfOTU0NTAzMTNORQ==&unique=1677014570&session=7e72ee6b9a74e6f21cae92cd484df72a&hostname=78.8.217.118	4.5				6	3	0	3	0	0	2		danger	15
Phenanthrene	85-01-8	organic	solid	178.23	Sigma-Aldrich	2021-10-30	https://sds.chemicalsafety.com/sds/pda/msds/getpdf.ashx?action=msdsdocument&auth=200C200C200C200C2008207A200D2078200C200C200C200C200C200C200C200C200C2008&param1=ZmRwLjFfNTY0NjgxMjNORQ==&unique=1677318642&session=e045b2d2e6973b7bf46c7a575e333af3&hostname=78.8.217.118	2.25	1.25	1.41421	113.137	3	2	0	0	1	0	2	1.5	warning	6	5.5
Phenanthrene	85-01-8	organic	solid	178.23	Thermo Fisher	2020-02-14	https://sds.chemicalsafety.com/sds/pda/msds/getpdf.ashx?action=msdsdocument&auth=200C200C200C200C2008207A200D2078200C200C200C200C200C200C200C200C200C2008&param1=ZmRwLjJfODIxNTAzMTNORQ==&unique=1677016914&session=7e72ee6b9a74e6f21cae92cd484df72a&hostname=78.8.217.118	0.25				1	0	0	0	1	0	1		warning	5
Phenyl benzoate	93-99-2	organic	solid	198.22	Thermo Fisher	2020-02-14	https://sds.chemicalsafety.com/sds/pda/msds/getpdf.ashx?action=msdsdocument&auth=200C200C200C200C2008207A200D2078200C200C200C200C200C200C200C200C200C2008&param1=ZmRwLjFfMzM4NjAzMTNORQ==&unique=1677018409&session=7e72ee6b9a74e6f21cae92cd484df72a&hostname=78.8.217.118	1.75	1.375	0.53033	38.5695	3	0	2	0	1	0	1	1	warning	11	9.5
Phenyl benzoate	93-99-2	organic	solid	198.22	Sigma-Aldrich	2020-10-23	https://sds.chemicalsafety.com/sds/pda/msds/getpdf.ashx?action=msdsdocument&auth=200C200C200C200C2008207A200D2078200C200C200C200C200C200C200C200C200C2008&param1=ZmRwLjFfNzcwNzYwMDNORQ==&unique=1677018409&session=7e72ee6b9a74e6f21cae92cd484df72a&hostname=78.8.217.118	1				2	0	1	0	1	0	1		warning	8
Phosphoric acid	7664-38-2	inorganic	liquid	98.00	Sigma-Aldrich	2022-10-06	https://sds.chemicalsafety.com/sds/pda/msds/getpdf.ashx?action=msdsdocument&auth=200C200C200C200C2008207A200D2078200C200C200C200C200C200C200C200C200C2008&param1=ZmRwLjFfMDAzNTI2MDNORQ==&unique=1677013534&session=7e72ee6b9a74e6f21cae92cd484df72a&hostname=78.8.217.118	3.25	3.25	0	0	4	3	0	0	1	0	2	2	danger	14	14
Phosphoric acid	7664-38-2	inorganic	liquid	98.00	U. S. Pharmacopeia	2020-06-12	https://sds.chemicalsafety.com/sds/pda/msds/getpdf.ashx?action=msdsdocument&auth=200C200C200C200C2008207A200D2078200C200C200C200C200C200C200C200C200C2008&param1=ZmRwLjFfMTExNzQ1MjNORQ==&unique=1677013539&session=7e72ee6b9a74e6f21cae92cd484df72a&hostname=78.8.217.118	3.25				4	3	0	0	1	0	2		danger
Procaine hydrochloride	51-05-8	organic	solid	272.77	Sigma-Aldrich	2021-09-13	https://sds.chemicalsafety.com/sds/pda/msds/getpdf.ashx?action=msdsdocument&auth=200C200C200C200C2008207A200D2078200C200C200C200C200C200C200C200C200C2008&param1=ZmRwLjJfODgwMjk3MDNORQ==&unique=1677019065&session=7e72ee6b9a74e6f21cae92cd484df72a&hostname=78.8.217.118	0.5	1	0.707107	70.7107	1	0	0	1	0	0	1	1	danger	5	8
Procaine hydrochloride	51-05-8	organic	solid	272.77	Combi-Blocks	2022-01-14	https://sds.chemicalsafety.com/sds/pda/msds/getpdf.ashx?action=msdsdocument&auth=200C200C200C200C2008207A200D2078200C200C200C200C200C200C200C200C200C2008&param1=ZmRwLjFfOTg0OTMxMjNORQ==&unique=1677019059&session=7e72ee6b9a74e6f21cae92cd484df72a&hostname=78.8.217.118	1.5				2	1	0	1	0	0	1		danger	11
Promazine hydrochloride	53-60-1	organic	solid	320.88	Sigma-Aldrich	2022-10-29	https://sds.chemicalsafety.com/sds/pda/msds/getpdf.ashx?action=msdsdocument&auth=200C200C200C200C2008207A200D2078200C200C200C200C200C200C200C200C200C2008&param1=ZmRwLjFfMjEzNjUzMjNORQ==&unique=1677019345&session=7e72ee6b9a74e6f21cae92cd484df72a&hostname=78.8.217.118	1.25	0.625	0.883883	141.421	2	1	0	0	1	0	1	0.5	warning	10	5
Promazine hydrochloride	53-60-1	organic	solid	320.88	Combi-Blocks	2022-01-05	https://sds.chemicalsafety.com/sds/pda/msds/getpdf.ashx?action=msdsdocument&auth=200C200C200C200C2008207A200D2078200C200C200C200C200C200C200C200C200C2008&param1=ZmRwLjFfMzc0MTEwMTNORQ==&unique=1677019342&session=7e72ee6b9a74e6f21cae92cd484df72a&hostname=78.8.217.118	0				0	0	0	0	0	0	0		none	0
Promethazine hydrochloride	58-33-3	organic	solid	320.88	Sigma-Aldrich	2022-03-29	https://sds.chemicalsafety.com/sds/pda/msds/getpdf.ashx?action=msdsdocument&auth=200C200C200C200C2008207A200D2078200C200C200C200C200C200C200C200C200C2008&param1=ZmRwLjFfMzIzNjUzMjNORQ==&unique=1677019556&session=7e72ee6b9a74e6f21cae92cd484df72a&hostname=78.8.217.118	3	3.625	0.883883	24.383	4	2	1	0	1	0	3	2.5	danger	13	16.5
Promethazine hydrochloride	58-33-3	organic	solid	320.88	Combi-Blocks	2022-01-14	https://sds.chemicalsafety.com/sds/pda/msds/getpdf.ashx?action=msdsdocument&auth=200C200C200C200C2008207A200D2078200C200C200C200C200C200C200C200C200C2008&param1=ZmRwLjFfMDI1MzMxMjNORQ==&unique=1677019551&session=7e72ee6b9a74e6f21cae92cd484df72a&hostname=78.8.217.118	4.25				7	1	3	1	2	0	2		warning	20
Quinine	130-95-0	organic	solid	324.42	Sigma-Aldrich	2021-10-07	https://sds.chemicalsafety.com/sds/pda/msds/getpdf.ashx?action=msdsdocument&auth=200C200C200C200C2008207A200D2078200C200C200C200C200C200C200C200C200C2008&param1=ZmRwLjFfMzMxNTc2MDNORQ==&unique=1677020868&session=7e72ee6b9a74e6f21cae92cd484df72a&hostname=78.8.217.118	2.5	3	0.707107	23.5702	4	1	1	1	1	0	1	1.5	warning	13	14
Quinine	130-95-0	organic	solid	324.42	Combi-Blocks	2021-03-12	https://sds.chemicalsafety.com/sds/pda/msds/getpdf.ashx?action=msdsdocument&auth=200C200C200C200C2008207A200D2078200C200C200C200C200C200C200C200C200C2008&param1=ZmRwLjFfMjk0NjkwMTNORQ==&unique=1677020869&session=7e72ee6b9a74e6f21cae92cd484df72a&hostname=78.8.217.118	3.5				4	2	2	0	0	0	2		danger	15
Reserpine	50-55-5	organic	solid	608.68	Sigma-Aldrich	2021-03-14	https://sds.chemicalsafety.com/sds/pda/msds/getpdf.ashx?action=msdsdocument&auth=200C200C200C200C2008207A200D2078200C200C200C200C200C200C200C200C200C2008&param1=ZmRwLjFfNTM1NzUzMjNORQ==&unique=1677157561&session=6365fb7a9edc69f8e4517c7c8da680ed&hostname=78.8.217.118	2.5	2.625	0.176777	6.73435	4	1	1	1	1	0	2	2	danger	13	14.5
Reserpine	50-55-5	organic	solid	608.68	Thermo Fisher	2020-02-14	https://sds.chemicalsafety.com/sds/pda/msds/getpdf.ashx?action=msdsdocument&auth=200C200C200C200C2008207A200D2078200C200C200C200C200C200C200C200C200C2008&param1=ZmRwLjFfNzMyODAzMTNORQ==&unique=1677157575&session=6365fb7a9edc69f8e4517c7c8da680ed&hostname=78.8.217.118	2.75				5	2	0	0	3	0	2		danger	16
Rhodamine 123	62669-70-9	organic	solid	380.82	Sigma-Aldrich	2020-01-21	https://sds.chemicalsafety.com/sds/pda/msds/getpdf.ashx?action=msdsdocument&auth=200C200C200C200C2008207A200D2078200C200C200C200C200C200C200C200C200C2008&param1=ZmRwLjFfNzM4NzQxMDNORQ==&unique=1677157890&session=6365fb7a9edc69f8e4517c7c8da680ed&hostname=78.8.217.118	0	0.125	0.176777	141.421	0	0	0	0	0	0	0	0.5	none	0	2
Rhodamine 123	62669-70-9	organic	solid	380.82	Combi-Blocks	2020-11-12	https://sds.chemicalsafety.com/sds/pda/msds/getpdf.ashx?action=msdsdocument&auth=200C200C200C200C2008207A200D2078200C200C200C200C200C200C200C200C200C2008&param1=ZmRwLjFfOTE5NTUxMTNORQ==&unique=1677157889&session=6365fb7a9edc69f8e4517c7c8da680ed&hostname=78.8.217.118	0.25				1	0	0	0	1	0	1		warning	4
Sodium borohydride	16940-66-2	inorganic	solid	37.83	Sigma-Aldrich	2021-09-19	https://sds.chemicalsafety.com/sds/pda/msds/getpdf.ashx?action=msdsdocument&auth=200C200C200C200C2008207A200D2078200C200C200C200C200C200C200C200C200C2008&param1=ZmRwLjFfOTAzOTgxMjNORQ==&unique=1677159538&session=6365fb7a9edc69f8e4517c7c8da680ed&hostname=78.8.217.118	4.5	4	0.707107	17.6777	5	4	0	1	0	0	4	3.5	danger	21	13.5
Sodium borohydride	16940-66-2	inorganic	solid	37.83	PANREAC QUIMICA	2021-04-28	https://sds.chemicalsafety.com/sds/pda/msds/getpdf.ashx?action=msdsdocument&auth=200C200C200C200C2008207A200D2078200C200C200C200C200C200C200C200C200C2008&param1=ZmRwLjFfNTcxNzg1MDNORQ==&unique=1677159520&session=6365fb7a9edc69f8e4517c7c8da680ed&hostname=78.8.217.118	3.5				4	3	0	1	0	0	3		danger	6
Sodium carbonate	497-19-8	inorganic	solid	105.99	Sigma-Aldrich	2021-09-17	https://sds.chemicalsafety.com/sds/pda/msds/getpdf.ashx?action=msdsdocument&auth=200C200C200C200C2008207A200D2078200C200C200C200C200C200C200C200C200C2008&param1=ZmRwLjJfMDc2OTE2MDNORQ==&unique=1677160249&session=6365fb7a9edc69f8e4517c7c8da680ed&hostname=78.8.217.118	0.75	0.75	0	0	1	0	1	0	0	0	1	1	warning	4	5.5
Sodium carbonate	497-19-8	inorganic	solid	105.99	Thermo Fisher	2020-02-14	https://sds.chemicalsafety.com/sds/pda/msds/getpdf.ashx?action=msdsdocument&auth=200C200C200C200C2008207A200D2078200C200C200C200C200C200C200C200C200C2008&param1=ZmRwLjFfNTgyODAzMTNORQ==&unique=1677160256&session=6365fb7a9edc69f8e4517c7c8da680ed&hostname=78.8.217.118	0.75				1	0	1	0	0	0	1		warning	7
Sodium dodecyl sulfate	151-21-3	organic	solid	288.38	Sigma-Aldrich	2022-10-19	https://sds.chemicalsafety.com/sds/pda/msds/getpdf.ashx?action=msdsdocument&auth=200C200C200C200C2008207A200D2078200C200C200C200C200C200C200C200C200C2008&param1=ZmRwLjNfMzY1MzgxMjNORQ==&unique=1677161438&session=6365fb7a9edc69f8e4517c7c8da680ed&hostname=78.8.217.118	3	3.625	0.883883	24.383	5	1	1	2	1	0	2	2.5	danger	10	14.5
Sodium dodecyl sulfate	151-21-3	organic	solid	288.38	Combi-Blocks	2020-01-29	https://sds.chemicalsafety.com/sds/pda/msds/getpdf.ashx?action=msdsdocument&auth=200C200C200C200C2008207A200D2078200C200C200C200C200C200C200C200C200C2008&param1=ZmRwLjFfMzkxNzUxMTNORQ==&unique=1677161431&session=6365fb7a9edc69f8e4517c7c8da680ed&hostname=78.8.217.118	4.25				7	2	1	2	2	0	3		danger	19
Sodium phosphate tribasic dodecahydrate	10101-89-0	inorganic	solid	380.12	Sigma-Aldrich	2022-07-23	https://sds.chemicalsafety.com/sds/pda/msds/getpdf.ashx?action=msdsdocument&auth=200C200C200C200C2008207A200D2078200C200C200C200C200C200C200C200C200C2008&param1=ZmRwLjJfODY5NDc2MDNORQ==&unique=1677433449&session=bdf11b8600b42b0c2a10febd77821c6b&hostname=78.8.217.118	2	2.5	0.707107	28.2843	3	0	2	1	0	0	1	1	warning	13	13.5
Sodium phosphate tribasic dodecahydrate	10101-89-0	inorganic	solid	380.12	Thermo Fisher	2022-11-30	https://sds.chemicalsafety.com/sds/pda/msds/getpdf.ashx?action=msdsdocument&auth=200C200C200C200C2008207A200D2078200C200C200C200C200C200C200C200C200C2008&param1=ZmRwLjFfODk2OTAzMTNORQ==&unique=1677433437&session=bdf11b8600b42b0c2a10febd77821c6b&hostname=78.8.217.118	3				4	1	2	1	0	0	1		warning	14
Sodium tetraborate decahydrate	1303-96-4	inorganic	solid	381.37	Sigma-Aldrich	2022-10-19	https://sds.chemicalsafety.com/sds/pda/msds/getpdf.ashx?action=msdsdocument&auth=200C200C200C200C2008207A200D2078200C200C200C200C200C200C200C200C200C2008&param1=ZmRwLjFfNjkyNDgxMjNORQ==&unique=1677434235&session=bdf11b8600b42b0c2a10febd77821c6b&hostname=78.8.217.118	1.75	1.75	0	0	2	1	1	0	0	0	2	2	danger	9	9.5
Sodium tetraborate decahydrate	1303-96-4	inorganic	solid	381.37	Thermo Fisher	2020-02-14	https://sds.chemicalsafety.com/sds/pda/msds/getpdf.ashx?action=msdsdocument&auth=200C200C200C200C2008207A200D2078200C200C200C200C200C200C200C200C200C2008&param1=ZmRwLjFfNzY1NjAzMTNORQ==&unique=1677434236&session=bdf11b8600b42b0c2a10febd77821c6b&hostname=78.8.217.118	1.75				2	1	1	0	0	0	2		danger	10
Solvent Blue 38	1328-51-4	organic	solid	367.86	Sigma-Aldrich	2020-01-15	https://sds.chemicalsafety.com/sds/pda/msds/getpdf.ashx?action=msdsdocument&auth=200C200C200C200C2008207A200D2078200C200C200C200C200C200C200C200C200C2008&param1=ZmRwLjFfNjY4NzQxMDNORQ==&unique=1677669052&session=cee9c3e3124a7c78e3d61a62e6a5f1a2&hostname=139.28.41.7	0	0	0	0	0	0	0	0	0	0	0	0	none	0	0
Solvent Blue 38	1328-51-4	organic	solid	367.86	Thermo Fisher	2020-02-18	https://sds.chemicalsafety.com/sds/pda/msds/getpdf.ashx?action=msdsdocument&auth=200C200C200C200C2008207A200D2078200C200C200C200C200C200C200C200C200C2008&param1=ZmRwLjFfNDY2NjAzMTNORQ==&unique=1677669190&session=cee9c3e3124a7c78e3d61a62e6a5f1a2&hostname=139.28.41.7	0				0	0	0	0	0	0	0		none	0
Sudan Black B	4197-25-5	inorganic	solid	456.54	Sigma-Aldrich	2021-05-10	https://sds.chemicalsafety.com/sds/pda/msds/getpdf.ashx?action=msdsdocument&auth=200C200C200C200C2008207A200D2078200C200C200C200C200C200C200C200C200C2008&param1=ZmRwLjFfMTc4NzQxMDNORQ==&unique=1677435092&session=bdf11b8600b42b0c2a10febd77821c6b&hostname=78.8.217.118	0.75	0.75	0	0	1	0	1	0	0	0	1	1	warning	6	6
Sudan Black B	4197-25-5	inorganic	solid	456.54	Thermo Fisher	2020-02-14	https://sds.chemicalsafety.com/sds/pda/msds/getpdf.ashx?action=msdsdocument&auth=200C200C200C200C2008207A200D2078200C200C200C200C200C200C200C200C200C2008&param1=ZmRwLjFfODg3NjAzMTNORQ==&unique=1677435092&session=bdf11b8600b42b0c2a10febd77821c6b&hostname=78.8.217.118	0.75				1	0	1	0	0	0	1		warning	6
Sulforhodamine B sodium salt	3520-42-1	organic	solid	580.65	Sigma-Aldrich	2020-01-14	https://sds.chemicalsafety.com/sds/pda/msds/getpdf.ashx?action=msdsdocument&auth=200C200C200C200C2008207A200D2078200C200C200C200C200C200C200C200C200C2008&param1=ZmRwLjFfMzk4MjE3MDNORQ==&unique=1677436096&session=bdf11b8600b42b0c2a10febd77821c6b&hostname=78.8.217.118	0	0	0	0	0	0	0	0	0	0	0	0	none	0	0
Sulforhodamine B sodium salt	3520-42-1	organic	solid	580.65	Thermo Fisher	2020-02-19	https://sds.chemicalsafety.com/sds/pda/msds/getpdf.ashx?action=msdsdocument&auth=200C200C200C200C2008207A200D2078200C200C200C200C200C200C200C200C200C2008&param1=ZmRwLjFfNzY2NzAzMTNORQ==&unique=1677436096&session=bdf11b8600b42b0c2a10febd77821c6b&hostname=78.8.217.118	0				0	0	0	0	0	0	0		none	0
Tartrazine	1934-21-0	organic	solid	534.36	Sigma-Aldrich	2021-10-28	https://sds.chemicalsafety.com/sds/pda/msds/getpdf.ashx?action=msdsdocument&auth=200C200C200C200C2008207A200D2078200C200C200C200C200C200C200C200C200C2008&param1=ZmRwLjFfMTk5NDc2MDNORQ==&unique=1677436423&session=bdf11b8600b42b0c2a10febd77821c6b&hostname=78.8.217.118	0	0	0	0	0	0	0	0	0	0	0	0	none	0	0
Tartrazine	1934-21-0	organic	solid	534.36	Thermo Fisher	2022-03-22	https://sds.chemicalsafety.com/sds/pda/msds/getpdf.ashx?action=msdsdocument&auth=200C200C200C200C2008207A200D2078200C200C200C200C200C200C200C200C200C2008&param1=ZmRwLjFfMDg2ODAzMTNORQ==&unique=1677436426&session=bdf11b8600b42b0c2a10febd77821c6b&hostname=78.8.217.118	0				0	0	0	0	0	0	0		none	0
Tetraethylene glycol	112-60-7	organic	liquid	194.23	Sigma-Aldrich	2020-01-15	https://sds.chemicalsafety.com/sds/pda/msds/getpdf.ashx?action=msdsdocument&auth=200C200C200C200C2008207A200D2078200C200C200C200C200C200C200C200C200C2008&param1=ZmRwLjFfMjgwMTgwMDNORQ==&unique=1677437423&session=bdf11b8600b42b0c2a10febd77821c6b&hostname=78.8.217.118	0	2.5	3.53553	141.421	0	0	0	0	0	0	0	1	none	0	7
Tetraethylene glycol	112-60-7	organic	liquid	194.23	Thermo Fisher	2020-02-14	https://sds.chemicalsafety.com/sds/pda/msds/getpdf.ashx?action=msdsdocument&auth=200C200C200C200C2008207A200D2078200C200C200C200C200C200C200C200C200C2008&param1=ZmRwLjFfNjg1NzAzMTNORQ==&unique=1677437425&session=bdf11b8600b42b0c2a10febd77821c6b&hostname=78.8.217.118	5				6	2	4	0	0	0	2		danger	14
Thymol	89-83-8	organic	solid	150.22	Sigma-Aldrich	2022-04-21	https://sds.chemicalsafety.com/sds/pda/msds/getpdf.ashx?action=msdsdocument&auth=200C200C200C200C2008207A200D2078200C200C200C200C200C200C200C200C200C2008&param1=ZmRwLjFfMTc5NDgxMjNORQ==&unique=1677439019&session=bdf11b8600b42b0c2a10febd77821c6b&hostname=78.8.217.118	3.75	3.75	0	0	5	2	2	0	1	0	3	2.5	danger	14	14.5
Thymol	89-83-8	organic	solid	150.22	Thermo Fisher	2020-02-14	https://sds.chemicalsafety.com/sds/pda/msds/getpdf.ashx?action=msdsdocument&auth=200C200C200C200C2008207A200D2078200C200C200C200C200C200C200C200C200C2008&param1=ZmRwLjFfNjk4NjAzMTNORQ==&unique=1677439051&session=bdf11b8600b42b0c2a10febd77821c6b&hostname=78.8.217.118	3.75				5	3	0	1	1	0	2		danger	15
trans-Cinnamic acid	140-10-3	organic	solid	148.16	Sigma-Aldrich	2021-06-01	https://sds.chemicalsafety.com/sds/pda/msds/getpdf.ashx?action=msdsdocument&auth=200C200C200C200C2008207A200D2078200C200C200C200C200C200C200C200C200C2008&param1=ZmRwLjRfMTA5MjM2MDNORQ==&unique=1677440386&session=bdf11b8600b42b0c2a10febd77821c6b&hostname=78.8.217.118	0	1.5	2.12132	141.421	0	0	0	0	0	0	0	0.5	none	0	7
trans-Cinnamic acid	140-10-3	organic	solid	148.16	Thermo Fisher	2020-02-14	https://sds.chemicalsafety.com/sds/pda/msds/getpdf.ashx?action=msdsdocument&auth=200C200C200C200C2008207A200D2078200C200C200C200C200C200C200C200C200C2008&param1=ZmRwLjFfMDYzOTAzMTNORQ==&unique=1677440397&session=bdf11b8600b42b0c2a10febd77821c6b&hostname=78.8.217.118	3				4	1	2	1	0	0	1		warning	14
Triacetin	102-76-1	organic	liquid	218.21	Sigma-Aldrich	2022-06-16	https://sds.chemicalsafety.com/sds/pda/msds/getpdf.ashx?action=msdsdocument&auth=200C200C200C200C2008207A200D2078200C200C200C200C200C200C200C200C200C2008&param1=ZmRwLjFfNjkwMDcwMDNORQ==&unique=1677440621&session=bdf11b8600b42b0c2a10febd77821c6b&hostname=78.8.217.118	0	1	1.41421	141.421	0	0	0	0	0	0	0	0.5	none	0	6.5
Triacetin	102-76-1	organic	liquid	218.21	Combi-Blocks	2020-12-18	https://sds.chemicalsafety.com/sds/pda/msds/getpdf.ashx?action=msdsdocument&auth=200C200C200C200C2008207A200D2078200C200C200C200C200C200C200C200C200C2008&param1=ZmRwLjFfNTAzNDYxMTNORQ==&unique=1677440622&session=bdf11b8600b42b0c2a10febd77821c6b&hostname=78.8.217.118	2				3	0	2	1	0	0	1		warning	13
Trifluoroacetic anhydride	407-25-0	organic	liquid	210.03	Sigma-Aldrich	2020-01-15	https://sds.chemicalsafety.com/sds/pda/msds/getpdf.ashx?action=msdsdocument&auth=200C200C200C200C2008207A200D2078200C200C200C200C200C200C200C200C200C2008&param1=ZmRwLjJfMDY2MzgxMjNORQ==&unique=1677441226&session=bdf11b8600b42b0c2a10febd77821c6b&hostname=78.8.217.118	3.25	3.5	0.353553	10.1015	5	2	0	2	1	0	2	2	danger	12	12.5
Trifluoroacetic anhydride	407-25-0	organic	liquid	210.03	Thermo Fisher	2020-02-14	https://sds.chemicalsafety.com/sds/pda/msds/getpdf.ashx?action=msdsdocument&auth=200C200C200C200C2008207A200D2078200C200C200C200C200C200C200C200C200C2008&param1=ZmRwLjFfMzE5NjAzMTNORQ==&unique=1677441216&session=bdf11b8600b42b0c2a10febd77821c6b&hostname=78.8.217.118	3.75				5	3	0	1	1	0	2		danger	13
Trisodium citrate dihydrate	6132-04-3	organic	solid	294.10	Sigma-Aldrich	2022-03-26	https://sds.chemicalsafety.com/sds/pda/msds/getpdf.ashx?action=msdsdocument&auth=200C200C200C200C2008207A200D2078200C200C200C200C200C200C200C200C200C2008&param1=ZmRwLjFfMTQwMjgwMDNORQ==&unique=1677442153&session=bdf11b8600b42b0c2a10febd77821c6b&hostname=78.8.217.118	0	0	0	0	0	0	0	0	0	0	0	0	none	0	0.5
Trisodium citrate dihydrate	6132-04-3	organic	solid	294.10	Thermo Fisher	2020-02-14	https://sds.chemicalsafety.com/sds/pda/msds/getpdf.ashx?action=msdsdocument&auth=200C200C200C200C2008207A200D2078200C200C200C200C200C200C200C200C200C2008&param1=ZmRwLjFfMDQwODAzMTNORQ==&unique=1677442153&session=bdf11b8600b42b0c2a10febd77821c6b&hostname=78.8.217.118	0				0	0	0	0	0	0	0		warning	1
Veratraldehyde	120-14-9	organic	solid	166.17	Sigma-Aldrich	2020-02-20	https://sds.chemicalsafety.com/sds/pda/msds/getpdf.ashx?action=msdsdocument&auth=200C200C200C200C2008207A200D2078200C200C200C200C200C200C200C200C200C2008&param1=ZmRwLjFfMDA1NTgxMjNORQ==&unique=1677443709&session=bdf11b8600b42b0c2a10febd77821c6b&hostname=78.8.217.118	1	2.125	1.59099	74.8701	2	0	1	0	1	0	1	1	warning	8	12.5
Veratraldehyde	120-14-9	organic	solid	166.17	Thermo Fisher	2020-02-14	https://sds.chemicalsafety.com/sds/pda/msds/getpdf.ashx?action=msdsdocument&auth=200C200C200C200C2008207A200D2078200C200C200C200C200C200C200C200C200C2008&param1=ZmRwLjFfNDgxODAzMTNORQ==&unique=1677443709&session=bdf11b8600b42b0c2a10febd77821c6b&hostname=78.8.217.118	3.25				5	1	2	1	1	0	1		warning	17
Xylenes	1330-20-7	organic	liquid	106.17	Sigma-Aldrich	2022-07-23	https://sds.chemicalsafety.com/sds/pda/msds/getpdf.ashx?action=msdsdocument&auth=200C200C200C200C2008207A200D2078200C200C200C200C200C200C200C200C200C2008&param1=ZmRwLjFfMjk4MTYzMjNORQ==&unique=1677444320&session=bdf11b8600b42b0c2a10febd77821c6b&hostname=78.8.217.118	6	5.875	0.176777	3.00897	10	1	4	3	2	0	3	3	danger	25	25.5
Xylenes	1330-20-7	organic	liquid	106.17	Thermo Fisher	2020-02-25	https://sds.chemicalsafety.com/sds/pda/msds/getpdf.ashx?action=msdsdocument&auth=200C200C200C200C2008207A200D2078200C200C200C200C200C200C200C200C200C2008&param1=ZmRwLjFfNzgyOTAzMTNORQ==&unique=1677444326&session=bdf11b8600b42b0c2a10febd77821c6b&hostname=78.8.217.118	5.75				9	2	3	2	2	0	3		danger	26
(2-Hydroxypropyl)-γ-cyclodextrin	128446-34-4	organic	solid	1761.8	Sigma-Aldrich	2022-03-26	https://sds.chemicalsafety.com/sds/pda/msds/getpdf.ashx?action=msdsdocument&auth=200C200C200C200C2008207A200D2078200C200C200C200C200C200C200C200C200C2008&param1=ZmRwLjFfNDQwNDQ1MjNORQ==&unique=1677529227&session=196cbe312fdaa5177aa60b1a0780f7ae&hostname=78.8.217.118	0	0	0	0	0	0	0	0	0	0	0	0	none	0	0
(2-Hydroxypropyl)-γ-cyclodextrin	128446-34-4	organic	solid	1761.8	Combi-Blocks	2022-08-09	https://sds.chemicalsafety.com/sds/pda/msds/getpdf.ashx?action=msdsdocument&auth=200C200C200C200C2008207A200D2078200C200C200C200C200C200C200C200C200C2008&param1=ZmRwLjFfNzU4MjI0MjNORQ==&unique=1677529227&session=196cbe312fdaa5177aa60b1a0780f7ae&hostname=78.8.217.118	0				0	0	0	0	0	0	0		none	0
3-Chloro-7-hydroxy-4-methyl-2h-chromen-2-one	6174-86-3	organic	solid	210.61	Sigma-Aldrich	2020-01-15	https://sds.chemicalsafety.com/sds/pda/msds/getpdf.ashx?action=msdsdocument&auth=200C200C200C200C2008207A200D2078200C200C200C200C200C200C200C200C200C2008&param1=ZmRwLjFfMjA3MzQwMDNORQ==&unique=1677529466&session=196cbe312fdaa5177aa60b1a0780f7ae&hostname=78.8.217.118	2	2	0	0	3	0	2	1	0	0	1	1	warning	13	13
3-Chloro-7-hydroxy-4-methyl-2h-chromen-2-one	6174-86-3	organic	solid	210.61	Combi-Blocks	2020-01-29	https://sds.chemicalsafety.com/sds/pda/msds/getpdf.ashx?action=msdsdocument&auth=200C200C200C200C2008207A200D2078200C200C200C200C200C200C200C200C200C2008&param1=ZmRwLjFfNDYxMDcxMTNORQ==&unique=1677529466&session=196cbe312fdaa5177aa60b1a0780f7ae&hostname=78.8.217.118	2				3	0	2	1	0	0	1		warning	13
4-Sulfocalix[4]arene	112269-92-8	organic	solid	744.74	Sigma-Aldrich	2020-01-15	https://sds.chemicalsafety.com/sds/pda/msds/getpdf.ashx?action=msdsdocument&auth=200C200C200C200C2008207A200D2078200C200C200C200C200C200C200C200C200C2008&param1=ZmRwLjFfODY4NDg2MDNORQ==&unique=1677529848&session=196cbe312fdaa5177aa60b1a0780f7ae&hostname=78.8.217.118	2	2	0	0	3	0	2	1	0	0	1	1	warning	13	13
4-Sulfocalix[4]arene	112269-92-8	organic	solid	744.74	Combi-Blocks	2020-01-29	https://sds.chemicalsafety.com/sds/pda/msds/getpdf.ashx?action=msdsdocument&auth=200C200C200C200C2008207A200D2078200C200C200C200C200C200C200C200C200C2008&param1=ZmRwLjFfMDk1MjcxMTNORQ==&unique=1677529848&session=196cbe312fdaa5177aa60b1a0780f7ae&hostname=78.8.217.118	2				3	0	2	1	0	0	1		warning	13
7-Hydroxy-4-(trifluoromethyl)coumarin	575-03-1	organic	solid	230.1	Combi-Blocks	2021-08-27	https://sds.chemicalsafety.com/sds/pda/msds/getpdf.ashx?action=msdsdocument&auth=200C200C200C200C2008207A200D2078200C200C200C200C200C200C200C200C200C2008&param1=ZmRwLjFfNzI0NTkwMTNORQ==&unique=1677529999&session=196cbe312fdaa5177aa60b1a0780f7ae&hostname=78.8.217.118	3	3	0	0	4	1	2	1	0	0	1	1	danger	15	14.5
7-Hydroxy-4-(trifluoromethyl)coumarin	575-03-1	organic	solid	230.1	Thermo Fisher	2020-02-14	https://sds.chemicalsafety.com/sds/pda/msds/getpdf.ashx?action=msdsdocument&auth=200C200C200C200C2008207A200D2078200C200C200C200C200C200C200C200C200C2008&param1=ZmRwLjFfODUxNzkyMTNORQ==&unique=1677529999&session=196cbe312fdaa5177aa60b1a0780f7ae&hostname=78.8.217.118	3				4	1	2	1	0	0	1		warning	14
Hexadecyltrimethylammonium bromide	57-09-0	organic	solid	364.45	Sigma-Aldrich	2022-08-27	https://sds.chemicalsafety.com/sds/pda/msds/getpdf.ashx?action=msdsdocument&auth=200C200C200C200C2008207A200D2078200C200C200C200C200C200C200C200C200C2008&param1=ZmRwLjFfNjgzNDgxMjNORQ==&unique=1677533147&session=196cbe312fdaa5177aa60b1a0780f7ae&hostname=78.8.217.118	5.25	6.125	1.23744	20.2031	7	3	2	1	1	0	4	4	danger	17	17
Hexadecyltrimethylammonium bromide	57-09-0	organic	solid	364.45	TCI America	2022-10-31	https://sds.chemicalsafety.com/sds/pda/msds/getpdf.ashx?action=msdsdocument&auth=200C200C200C200C2008207A200D2078200C200C200C200C200C200C200C200C200C2008&param1=ZmRwLjFfMTM3OTY0MjNORQ==&unique=1677533153&session=196cbe312fdaa5177aa60b1a0780f7ae&hostname=78.8.217.118	7				9	4	3	1	1	0	4		danger
Calix[6]arene	96107-95-8	organic	solid	636.7	Combi-Blocks	2022-06-02	https://sds.chemicalsafety.com/sds/pda/msds/getpdf.ashx?action=msdsdocument&auth=200C200C200C200C2008207A200D2078200C200C200C200C200C200C200C200C200C2008&param1=ZmRwLjFfODM1MzYxMTNORQ==&unique=1677533367&session=196cbe312fdaa5177aa60b1a0780f7ae&hostname=78.8.217.118	2	2.5	0.707107	28.2843	3	0	2	1	0	0	1	1	warning	13	13.5
Calix[6]arene	96107-95-8	organic	solid	636.7	Thermo Fisher	2020-02-14	https://sds.chemicalsafety.com/sds/pda/msds/getpdf.ashx?action=msdsdocument&auth=200C200C200C200C2008207A200D2078200C200C200C200C200C200C200C200C200C2008&param1=ZmRwLjFfODg2MDAzMTNORQ==&unique=1677533367&session=196cbe312fdaa5177aa60b1a0780f7ae&hostname=78.8.217.118	3				4	1	2	1	0	0	1		warning	14
Calix[8]arene	82452-93-5	organic	solid	721.0	Combi-Blocks	2022-08-11	https://sds.chemicalsafety.com/sds/pda/msds/getpdf.ashx?action=msdsdocument&auth=200C200C200C200C2008207A200D2078200C200C200C200C200C200C200C200C200C2008&param1=ZmRwLjFfMDgxMjYxMTNORQ==&unique=1677533512&session=196cbe312fdaa5177aa60b1a0780f7ae&hostname=78.8.217.118	2	2.5	0.707107	28.2843	3	0	2	1	0	0	1	1	warning	13	13.5
Calix[8]arene	82452-93-5	organic	solid	721.0	Thermo Fisher	2020-02-14	https://sds.chemicalsafety.com/sds/pda/msds/getpdf.ashx?action=msdsdocument&auth=200C200C200C200C2008207A200D2078200C200C200C200C200C200C200C200C200C2008&param1=ZmRwLjFfMjE1MDAzMTNORQ==&unique=1677533512&session=196cbe312fdaa5177aa60b1a0780f7ae&hostname=78.8.217.118	3				4	1	2	1	0	0	1		warning	14
Barium chloride dihydrate	10326-27-9	inorganic	solid	244.26	Sigma-Aldrich	2022-10-19	https://sds.chemicalsafety.com/sds/pda/msds/getpdf.ashx?action=msdsdocument&auth=200C200C200C200C2008207A200D2078200C200C200C200C200C200C200C200C200C2008&param1=ZmRwLjFfOTAwNjUwMDNORQ==&unique=1677533710&session=196cbe312fdaa5177aa60b1a0780f7ae&hostname=78.8.217.118	1.5	1.5	0	0	3	0	1	1	1	0	2	1.5	danger	11	12
Barium chloride dihydrate	10326-27-9	inorganic	solid	244.26	Thermo Fisher	2020-02-14	https://sds.chemicalsafety.com/sds/pda/msds/getpdf.ashx?action=msdsdocument&auth=200C200C200C200C2008207A200D2078200C200C200C200C200C200C200C200C200C2008&param1=ZmRwLjFfMTE4NTkyMTNORQ==&unique=1677533718&session=196cbe312fdaa5177aa60b1a0780f7ae&hostname=78.8.217.118	1.5				3	0	1	1	1	0	1		danger	13
Copper(II) chloride dihydrate	10125-13-0	inorganic	solid	170.48	Sigma-Aldrich	2022-08-27	https://sds.chemicalsafety.com/sds/pda/msds/getpdf.ashx?action=msdsdocument&auth=200C200C200C200C2008207A200D2078200C200C200C200C200C200C200C200C200C2008&param1=ZmRwLjFfNzgxNDg2MDNORQ==&unique=1677533969&session=196cbe312fdaa5177aa60b1a0780f7ae&hostname=78.8.217.118	4	3.125	1.23744	39.598	6	2	2	0	2	0	3	2.5	danger	11	11.5
Copper(II) chloride dihydrate	10125-13-0	inorganic	solid	170.48	Thermo Fisher	2020-02-14	https://sds.chemicalsafety.com/sds/pda/msds/getpdf.ashx?action=msdsdocument&auth=200C200C200C200C2008207A200D2078200C200C200C200C200C200C200C200C200C2008&param1=ZmRwLjFfNDM5OTkyMTNORQ==&unique=1677533971&session=196cbe312fdaa5177aa60b1a0780f7ae&hostname=78.8.217.118	2.25				4	1	1	0	2	0	2		danger	12
Calcium chloride hexahydrate	7774-34-7	inorganic	solid	219.08	Sigma-Aldrich	2022-10-29	https://sds.chemicalsafety.com/sds/pda/msds/getpdf.ashx?action=msdsdocument&auth=200C200C200C200C2008207A200D2078200C200C200C200C200C200C200C200C200C2008&param1=ZmRwLjFfNTg5MTYzMjNORQ==&unique=1677534404&session=196cbe312fdaa5177aa60b1a0780f7ae&hostname=78.8.217.118	0.75	0.75	0	0	1	0	1	0	0	0	1	1	warning	4	4
Calcium chloride hexahydrate	7774-34-7	inorganic	solid	219.08	Combi-Blocks	2022-01-07	https://sds.chemicalsafety.com/sds/pda/msds/getpdf.ashx?action=msdsdocument&auth=200C200C200C200C2008207A200D2078200C200C200C200C200C200C200C200C200C2008&param1=ZmRwLjFfMTM2OTYxMTNORQ==&unique=1677534399&session=196cbe312fdaa5177aa60b1a0780f7ae&hostname=78.8.217.118	0.75				1	0	1	0	0	0	1		warning	4
Citalopram Hydrobromide	59729-32-7	organic	solid	405.31	Sigma-Aldrich	2021-03-14	https://sds.chemicalsafety.com/sds/pda/msds/getpdf.ashx?action=msdsdocument&auth=200C200C200C200C2008207A200D2078200C200C200C200C200C200C200C200C200C2008&param1=ZmRwLjFfNjYwMjYzMjNORQ==&unique=1677534529&session=196cbe312fdaa5177aa60b1a0780f7ae&hostname=78.8.217.118	2.5	1.375	1.59099	115.708	5	0	1	3	1	0	2	1.5	warning	14	9
Citalopram Hydrobromide	59729-32-7	organic	solid	405.31	Combi-Blocks	2020-01-24	https://sds.chemicalsafety.com/sds/pda/msds/getpdf.ashx?action=msdsdocument&auth=200C200C200C200C2008207A200D2078200C200C200C200C200C200C200C200C200C2008&param1=ZmRwLjFfNDYyMDExMTNORQ==&unique=1677534527&session=196cbe312fdaa5177aa60b1a0780f7ae&hostname=78.8.217.118	0.25				1	0	0	0	1	0	1		warning	4
Ethanolamine	141-43-5	organic	liquid	61.08	Sigma-Aldrich	2020-01-28	https://sds.chemicalsafety.com/sds/pda/msds/getpdf.ashx?action=msdsdocument&auth=200C200C200C200C2008207A200D2078200C200C200C200C200C200C200C200C200C2008&param1=ZmRwLjVfOTgzNzAyMjNORQ==&unique=1677595466&session=2c544a1300c519092899afa4112f269c&hostname=78.8.217.118	4.75	4.625	0.176777	3.8222	9	2	1	2	4	0	2	2	danger	18	18
Ethanolamine	141-43-5	organic	liquid	61.08	Thermo Fisher	2020-02-14	https://sds.chemicalsafety.com/sds/pda/msds/getpdf.ashx?action=msdsdocument&auth=200C200C200C200C2008207A200D2078200C200C200C200C200C200C200C200C200C2008&param1=ZmRwLjFfOTI3MTAzMTNORQ==&unique=1677595464&session=2c544a1300c519092899afa4112f269c&hostname=78.8.217.118	4.5				8	3	0	1	4	0	2		danger	18
Paroxetine hydrochloride hemihydrate	110429-35-1	organic	solid	374.83	Sigma-Aldrich	2022-03-31	https://sds.chemicalsafety.com/sds/pda/msds/getpdf.ashx?action=msdsdocument&auth=200C200C200C200C2008207A200D2078200C200C200C200C200C200C200C200C200C2008&param1=ZmRwLjFfNzQ0OTMzMjNORQ==&unique=1677596404&session=2c544a1300c519092899afa4112f269c&hostname=78.8.217.118	4.5	2.25	3.18198	141.421	6	3	1	1	1	0	2	1	warning	18	9
Paroxetine hydrochloride hemihydrate	110429-35-1	organic	solid	374.83	Combi-Blocks	2023-01-02	https://sds.chemicalsafety.com/sds/pda/msds/getpdf.ashx?action=msdsdocument&auth=200C200C200C200C2008207A200D2078200C200C200C200C200C200C200C200C200C2008&param1=ZmRwLjFfMjU3NzMwMTNORQ==&unique=1677596401&session=2c544a1300c519092899afa4112f269c&hostname=78.8.217.118	0				0	0	0	0	0	0	0		none	0
Propylamine	107-10-8	organic	liquid	59.11	Sigma-Aldrich	2021-02-25	https://sds.chemicalsafety.com/sds/pda/msds/getpdf.ashx?action=msdsdocument&auth=200C200C200C200C2008207A200D2078200C200C200C200C200C200C200C200C200C2008&param1=ZmRwLjJfOTE3NTc2MDNORQ==&unique=1677598715&session=2c544a1300c519092899afa4112f269c&hostname=78.8.217.118	6	6.25	0.353553	5.65685	9	3	1	4	1	0	4	3.5	danger	26	26.5
Propylamine	107-10-8	organic	liquid	59.11	Thermo Fisher	2020-02-14	https://sds.chemicalsafety.com/sds/pda/msds/getpdf.ashx?action=msdsdocument&auth=200C200C200C200C2008207A200D2078200C200C200C200C200C200C200C200C200C2008&param1=ZmRwLjFfNTAwMjEzMTNORQ==&unique=1677598717&session=2c544a1300c519092899afa4112f269c&hostname=78.8.217.118	6.5				9	4	1	3	1	0	3		danger	27
1,4-Diaminobutane	110-60-1	organic	solid	88.15	Sigma-Aldrich	2021-02-25	https://sds.chemicalsafety.com/sds/pda/msds/getpdf.ashx?action=msdsdocument&auth=200C200C200C200C2008207A200D2078200C200C200C200C200C200C200C200C200C2008&param1=ZmRwLjFfNzY5MzgxMjNORQ==&unique=1677598945&session=2c544a1300c519092899afa4112f269c&hostname=78.8.217.118	4.5	4.75	0.353553	7.44323	6	3	1	1	1	0	2	2	danger	18	17
1,4-Diaminobutane	110-60-1	organic	solid	88.15	Thermo Fisher	2020-02-14	https://sds.chemicalsafety.com/sds/pda/msds/getpdf.ashx?action=msdsdocument&auth=200C200C200C200C2008207A200D2078200C200C200C200C200C200C200C200C200C2008&param1=ZmRwLjFfMzA4OTAzMTNORQ==&unique=1677598947&session=2c544a1300c519092899afa4112f269c&hostname=78.8.217.118	5				7	3	1	2	1	0	2		danger	16
Sertraline hydrochloride	79559-97-0	organic	solid	342.69	Sigma-Aldrich	2022-08-25	https://sds.chemicalsafety.com/sds/pda/msds/getpdf.ashx?action=msdsdocument&auth=200C200C200C200C2008207A200D2078200C200C200C200C200C200C200C200C200C2008&param1=ZmRwLjFfNDY1MTQxMjNORQ==&unique=1677948840&session=0e1da735f43fe643971f4dc37256385c&hostname=78.8.217.118	3	2.75	0.353553	12.8565	4	2	1	0	1	0	3	2	warning	8	11.5
Sertraline hydrochloride	79559-97-0	organic	solid	342.69	Combi-Blocks	2023-01-02	https://sds.chemicalsafety.com/sds/pda/msds/getpdf.ashx?action=msdsdocument&auth=200C200C200C200C2008207A200D2078200C200C200C200C200C200C200C200C200C2008&param1=ZmRwLjFfMjI1NTMxMjNORQ==&unique=1677948834&session=0e1da735f43fe643971f4dc37256385c&hostname=78.8.217.118	2.5				5	0	2	1	2	0	1		warning	15
Triacetyl-β-cyclodextrin	23739-88-0	organic	solid	2017.75	Sigma-Aldrich	2020-09-30	https://sds.chemicalsafety.com/sds/pda/msds/getpdf.ashx?action=msdsdocument&auth=200C200C200C200C2008207A200D2078200C200C200C200C200C200C200C200C200C2008&param1=ZmRwLjFfNTg5NDc2MDNORQ==&unique=1677949078&session=0e1da735f43fe643971f4dc37256385c&hostname=78.8.217.118	0	0	0	0	0	0	0	0	0	0	0	0	none	0	0
Triacetyl-β-cyclodextrin	23739-88-0	organic	solid	2017.75	Combi-Blocks	2023-01-02	https://sds.chemicalsafety.com/sds/pda/msds/getpdf.ashx?action=msdsdocument&auth=200C200C200C200C2008207A200D2078200C200C200C200C200C200C200C200C200C2008&param1=ZmRwLjFfMzc4MzAyMTNORQ==&unique=1677949078&session=0e1da735f43fe643971f4dc37256385c&hostname=78.8.217.118	0				0	0	0	0	0	0	0		none	0
Venlafaxine hydrochloride	99300-78-4	organic	solid	313.86	Sigma-Aldrich	2022-01-26	https://sds.chemicalsafety.com/sds/pda/msds/getpdf.ashx?action=msdsdocument&auth=200C200C200C200C2008207A200D2078200C200C200C200C200C200C200C200C200C2008&param1=ZmRwLjFfNTg0MTYzMjNORQ==&unique=1677949822&session=0e1da735f43fe643971f4dc37256385c&hostname=78.8.217.118	1.5	1.125	0.53033	47.1405	2	0	2	0	0	0	1	1	none	3	3.5
Venlafaxine hydrochloride	99300-78-4	organic	solid	313.86	Combi-Blocks	2023-01-02	https://sds.chemicalsafety.com/sds/pda/msds/getpdf.ashx?action=msdsdocument&auth=200C200C200C200C2008207A200D2078200C200C200C200C200C200C200C200C200C2008&param1=ZmRwLjFfNzAxNDMxMjNORQ==&unique=1677949821&session=0e1da735f43fe643971f4dc37256385c&hostname=78.8.217.118	0.75				1	0	1	0	0	0	1		warning	4
Zearalenone	17924-92-4	organic	solid	318.36	Sigma-Aldrich	2022-09-06	https://sds.chemicalsafety.com/sds/pda/msds/getpdf.ashx?action=msdsdocument&auth=200C200C200C200C2008207A200D2078200C200C200C200C200C200C200C200C200C2008&param1=ZmRwLjFfNjczNzgwMDNORQ==&unique=1677950062&session=0e1da735f43fe643971f4dc37256385c&hostname=78.8.217.118	2.75	2.375	0.53033	22.3297	3	2	1	0	0	0	2	1.5	danger	13	13
Zearalenone	17924-92-4	organic	solid	318.36	TCI America	2022-11-15	https://sds.chemicalsafety.com/sds/pda/msds/getpdf.ashx?action=msdsdocument&auth=200C200C200C200C2008207A200D2078200C200C200C200C200C200C200C200C200C2008&param1=ZmRwLjFfNDAyNjA1MjNORQ==&unique=1677950063&session=0e1da735f43fe643971f4dc37256385c&hostname=78.8.217.118	2				2	2	0	0	0	0	1		danger
Methylthymol Blue sodium salt	1945-77-3	organic	solid	844.76	Thermo Fisher	2020-02-14	https://sds.chemicalsafety.com/sds/pda/msds/getpdf.ashx?action=msdsdocument&auth=200C200C200C200C2008207A200D2078200C200C200C200C200C200C200C200C200C2008&param1=ZmRwLjFfNTI2NTAzMTNORQ==&unique=1677951144&session=0e1da735f43fe643971f4dc37256385c&hostname=78.8.217.118	0	0	0	0	0	0	0	0	0	0	0	0	none	0	0
Methylthymol Blue sodium salt	1945-77-3	organic	solid	844.76	Combi-Blocks	2023-01-02	https://sds.chemicalsafety.com/sds/pda/msds/getpdf.ashx?action=msdsdocument&auth=200C200C200C200C2008207A200D2078200C200C200C200C200C200C200C200C200C2008&param1=ZmRwLjFfOTc2NTMxMTNORQ==&unique=1677951135&session=0e1da735f43fe643971f4dc37256385c&hostname=78.8.217.118	0				0	0	0	0	0	0	0		none	0
Potassium hydroxide	1310-58-3	inorganic	solid	56.11	Sigma-Aldrich	2021-09-18	https://sds.chemicalsafety.com/sds/pda/msds/getpdf.ashx?action=msdsdocument&auth=200C200C200C200C2008207A200D2078200C200C200C200C200C200C200C200C200C2008&param1=ZmRwLjJfNjQ0MjI2MDNORQ==&unique=1677951333&session=0e1da735f43fe643971f4dc37256385c&hostname=78.8.217.118	3.75	3	1.06066	35.3553	5	3	0	1	1	0	2	2	danger	16	11.5
Potassium hydroxide	1310-58-3	inorganic	solid	56.11	PANREAC QUIMICA	2020-07-23	https://sds.chemicalsafety.com/sds/pda/msds/getpdf.ashx?action=msdsdocument&auth=200C200C200C200C2008207A200D2078200C200C200C200C200C200C200C200C200C2008&param1=ZmRwLjFfOTM3Njg1MDNORQ==&unique=1677951329&session=0e1da735f43fe643971f4dc37256385c&hostname=78.8.217.118	2.25				3	2	0	0	1	0	2		danger	7
Calcium carbonate	471-34-1	inorganic	solid	100.09	Sigma-Aldrich	2022-10-19	https://sds.chemicalsafety.com/sds/pda/msds/getpdf.ashx?action=msdsdocument&auth=200C200C200C200C2008207A200D2078200C200C200C200C200C200C200C200C200C2008&param1=ZmRwLjFfMjk4MzgxMjNORQ==&unique=1677953939&session=0e1da735f43fe643971f4dc37256385c&hostname=78.8.217.118	0.5	0.25	0.353553	141.421	1	0	0	1	0	0	0	0	none	2	1
Calcium carbonate	471-34-1	inorganic	solid	100.09	U. S. Pharmacopeia	2022-09-26	https://sds.chemicalsafety.com/sds/pda/msds/getpdf.ashx?action=msdsdocument&auth=200C200C200C200C2008207A200D2078200C200C200C200C200C200C200C200C200C2008&param1=ZmRwLjFfNzU2NTQ1MjNORQ==&unique=1677953943&session=0e1da735f43fe643971f4dc37256385c&hostname=78.8.217.118	0				0	0	0	0	0	0	0		none	0
Ammonium iron(II) sulfate hexahydrate	7783-85-9	inorganic	solid	392.14	Sigma-Aldrich	2022-10-19	https://sds.chemicalsafety.com/sds/pda/msds/getpdf.ashx?action=msdsdocument&auth=200C200C200C200C2008207A200D2078200C200C200C200C200C200C200C200C200C2008&param1=ZmRwLjFfNTc4NTgxMjNORQ==&unique=1677954572&session=0e1da735f43fe643971f4dc37256385c&hostname=78.8.217.118	0	1.5	2.12132	141.421	0	0	0	0	0	0	0	0.5	none	0	7
Ammonium iron(II) sulfate hexahydrate	7783-85-9	inorganic	solid	392.14	Thermo Fisher	2020-02-14	https://sds.chemicalsafety.com/sds/pda/msds/getpdf.ashx?action=msdsdocument&auth=200C200C200C200C2008207A200D2078200C200C200C200C200C200C200C200C200C2008&param1=ZmRwLjFfODAwMDAzMTNORQ==&unique=1677954575&session=0e1da735f43fe643971f4dc37256385c&hostname=78.8.217.118	3				4	1	2	1	0	0	1		warning	14
Potassium sulfate	7778-80-5	inorganic	solid	174.26	Sigma-Aldrich	2022-04-04	https://sds.chemicalsafety.com/sds/pda/msds/getpdf.ashx?action=msdsdocument&auth=200C200C200C200C2008207A200D2078200C200C200C200C200C200C200C200C200C2008&param1=ZmRwLjFfNTU5ODI2MDNORQ==&unique=1677955851&session=0e1da735f43fe643971f4dc37256385c&hostname=78.8.217.118	0	1.125	1.59099	141.421	0	0	0	0	0	0	0	0.5	none	0	7.5
Potassium sulfate	7778-80-5	inorganic	solid	174.26	Combi-Blocks	2023-01-02	https://sds.chemicalsafety.com/sds/pda/msds/getpdf.ashx?action=msdsdocument&auth=200C200C200C200C2008207A200D2078200C200C200C200C200C200C200C200C200C2008&param1=ZmRwLjFfMTg0ODUxMTNORQ==&unique=1677955842&session=0e1da735f43fe643971f4dc37256385c&hostname=78.8.217.118	2.25				4	0	2	1	1	0	1		warning	15
Sodium phosphate monobasic monohydrate	10049-21-5	inorganic	solid	137.99	Sigma-Aldrich	2020-09-02	https://sds.chemicalsafety.com/sds/pda/msds/getpdf.ashx?action=msdsdocument&auth=200C200C200C200C2008207A200D2078200C200C200C200C200C200C200C200C200C2008&param1=ZmRwLjJfMDA2MTYzMjNORQ==&unique=1677959227&session=0e1da735f43fe643971f4dc37256385c&hostname=78.8.217.118	0	1	1.41421	141.421	0	0	0	0	0	0	0	0.5	none	0	6.5
Sodium phosphate monobasic monohydrate	10049-21-5	inorganic	solid	137.99	Combi-Blocks	2023-01-02	https://sds.chemicalsafety.com/sds/pda/msds/getpdf.ashx?action=msdsdocument&auth=200C200C200C200C2008207A200D2078200C200C200C200C200C200C200C200C200C2008&param1=ZmRwLjFfNjk3MzUxMTNORQ==&unique=1677959231&session=0e1da735f43fe643971f4dc37256385c&hostname=78.8.217.118	2				3	0	2	1	0	0	1		warning	13
Methyl Red	493-52-7	organic	solid	269.30	Sigma-Aldrich	2021-04-25	https://sds.chemicalsafety.com/sds/pda/msds/getpdf.ashx?action=msdsdocument&auth=200C200C200C200C2008207A200D2078200C200C200C200C200C200C200C200C200C2008&param1=ZmRwLjFfNTQ1ODgwMDNORQ==&unique=1677959513&session=0e1da735f43fe643971f4dc37256385c&hostname=78.8.217.118	0.75	0.375	0.53033	141.421	1	0	1	0	0	0	0	0	none	2	1
Methyl Red	493-52-7	organic	solid	269.30	Thermo Fisher	2022-07-26	https://sds.chemicalsafety.com/sds/pda/msds/getpdf.ashx?action=msdsdocument&auth=200C200C200C200C2008207A200D2078200C200C200C200C200C200C200C200C200C2008&param1=ZmRwLjFfMDE3NDAzMTNORQ==&unique=1677959513&session=0e1da735f43fe643971f4dc37256385c&hostname=78.8.217.118	0				0	0	0	0	0	0	0		none	0
Sodium thiosulfate pentahydrate	10102-17-7	inorganic	solid	248.18	Sigma-Aldrich	2022-04-23	https://sds.chemicalsafety.com/sds/pda/msds/getpdf.ashx?action=msdsdocument&auth=200C200C200C200C2008207A200D2078200C200C200C200C200C200C200C200C200C2008&param1=ZmRwLjFfODk1OTc2MDNORQ==&unique=1678021227&session=60679ec97dfd8e96885c0cbe0e61b143&hostname=139.28.41.7	0	0	0	0	0	0	0	0	0	0	0	0	none	0	0.5
Sodium thiosulfate pentahydrate	10102-17-7	inorganic	solid	248.18	Thermo Fisher	2020-02-14	https://sds.chemicalsafety.com/sds/pda/msds/getpdf.ashx?action=msdsdocument&auth=200C200C200C200C2008207A200D2078200C200C200C200C200C200C200C200C200C2008&param1=ZmRwLjFfNjI2NjAzMTNORQ==&unique=1678021265&session=60679ec97dfd8e96885c0cbe0e61b143&hostname=139.28.41.7	0				0	0	0	0	0	0	0		warning	1
Sodium L-tartrate dibasic dihydrate	6106-24-7	organic	solid	230.08	Sigma-Aldrich	2022-04-12	https://sds.chemicalsafety.com/sds/pda/msds/getpdf.ashx?action=msdsdocument&auth=200C200C200C200C2008207A200D2078200C200C200C200C200C200C200C200C200C2008&param1=ZmRwLjFfOTk0ODYwMDNORQ==&unique=1678022070&session=60679ec97dfd8e96885c0cbe0e61b143&hostname=139.28.41.7	0	0	0	0	0	0	0	0	0	0	0	0	none	0	0
Sodium L-tartrate dibasic dihydrate	6106-24-7	organic	solid	230.08	Thermo Fisher	2022-02-14	https://sds.chemicalsafety.com/sds/pda/msds/getpdf.ashx?action=msdsdocument&auth=200C200C200C200C2008207A200D2078200C200C200C200C200C200C200C200C200C2008&param1=ZmRwLjFfODE1NzAzMTNORQ==&unique=1678022162&session=60679ec97dfd8e96885c0cbe0e61b143&hostname=139.28.41.7	0				0	0	0	0	0	0	0		none	0
Potassium iodate	2139718	inorganic	solid	214.00	Sigma-Aldrich	2022-10-19	https://sds.chemicalsafety.com/sds/pda/msds/getpdf.ashx?action=msdsdocument&auth=200C200C200C200C2008207A200D2078200C200C200C200C200C200C200C200C200C2008&param1=ZmRwLjFfNTcxNTgxMjNORQ==&unique=1678022927&session=60679ec97dfd8e96885c0cbe0e61b143&hostname=139.28.41.7	2	3	1.41421	47.1405	3	1	1	0	1	0	3	2.5	danger	10	15.5
Potassium iodate	2139718	inorganic	solid	214.00	Thermo Fisher	2020-02-14	https://sds.chemicalsafety.com/sds/pda/msds/getpdf.ashx?action=msdsdocument&auth=200C200C200C200C2008207A200D2078200C200C200C200C200C200C200C200C200C2008&param1=ZmRwLjFfMDQ5NjAzMTNORQ==&unique=1678023024&session=60679ec97dfd8e96885c0cbe0e61b143&hostname=139.28.41.7	4				6	1	3	1	1	0	2		danger	21
Sodium nitrate	7631-99-4	inorganic	solid	84.99	Sigma-Aldrich	2022-03-03	https://sds.chemicalsafety.com/sds/pda/msds/getpdf.ashx?action=msdsdocument&auth=200C200C200C200C2008207A200D2078200C200C200C200C200C200C200C200C200C2008&param1=ZmRwLjFfMzEyNTgxMjNORQ==&unique=1678023856&session=60679ec97dfd8e96885c0cbe0e61b143&hostname=139.28.41.7	1.25	2.125	1.23744	58.2323	2	0	1	1	0	0	2	2.5	warning	9	12.5
Sodium nitrate	7631-99-4	inorganic	solid	84.99	Thermo Fisher	2020-02-14	https://sds.chemicalsafety.com/sds/pda/msds/getpdf.ashx?action=msdsdocument&auth=200C200C200C200C2008207A200D2078200C200C200C200C200C200C200C200C200C2008&param1=ZmRwLjFfMTE5ODAzMTNORQ==&unique=1678023950&session=60679ec97dfd8e96885c0cbe0e61b143&hostname=139.28.41.7	3				4	1	2	1	0	0	3		warning	16
Potassium permanganate	7722-64-7	inorganic	solid	158.03	Sigma-Aldrich	2021-09-17	https://sds.chemicalsafety.com/sds/pda/msds/getpdf.ashx?action=msdsdocument&auth=200C200C200C200C2008207A200D2078200C200C200C200C200C200C200C200C200C2008&param1=ZmRwLjFfMTEzMjIyMjNORQ==&unique=1678024330&session=60679ec97dfd8e96885c0cbe0e61b143&hostname=139.28.41.7	5	4.75	0.353553	7.44323	6	4	1	0	1	0	4	4.5	danger	18	12.5
Potassium permanganate	7722-64-7	inorganic	solid	158.03	PANREAC QUIMICA	2020-12-14	https://sds.chemicalsafety.com/sds/pda/msds/getpdf.ashx?action=msdsdocument&auth=200C200C200C200C2008207A200D2078200C200C200C200C200C200C200C200C200C2008&param1=ZmRwLjFfOTIxNzg1MDNORQ==&unique=1678024420&session=60679ec97dfd8e96885c0cbe0e61b143&hostname=139.28.41.7	4.5				6	2	3	0	1	0	5		danger	7
Potassium bromate	7758-01-2	inorganic	solid	167.00	Sigma-Aldrich	2022-11-29	https://sds.chemicalsafety.com/sds/pda/msds/getpdf.ashx?action=msdsdocument&auth=200C200C200C200C2008207A200D2078200C200C200C200C200C200C200C200C200C2008&param1=ZmRwLjFfOTE1NzYwMDNORQ==&unique=1678028268&session=60679ec97dfd8e96885c0cbe0e61b143&hostname=139.28.41.7	2.5	4	2.12132	53.033	3	2	0	1	0	0	3	3	danger	16	18.5
Potassium bromate	7758-01-2	inorganic	solid	167.00	Thermo Fisher	2020-02-14	https://sds.chemicalsafety.com/sds/pda/msds/getpdf.ashx?action=msdsdocument&auth=200C200C200C200C2008207A200D2078200C200C200C200C200C200C200C200C200C2008&param1=ZmRwLjFfMTc0NjAzMTNORQ==&unique=1678028363&session=60679ec97dfd8e96885c0cbe0e61b143&hostname=139.28.41.7	5.5				7	3	2	2	0	0	3		danger	21
Cis-4,7,10,13,16,19-docosahexaenoic acid	6217-54-5	organic	liquid	328.49	Sigma-Aldrich	2022-06-16	https://sds.chemicalsafety.com/sds/pda/msds/getpdf.ashx?action=msdsdocument&auth=200C200C200C200C2008207A200D2078200C200C200C200C200C200C200C200C200C2008&param1=ZmRwLjFfOTA0NzAyMjNORQ==&unique=1678028938&session=60679ec97dfd8e96885c0cbe0e61b143&hostname=139.28.41.7	0.25	0.125	0.176777	141.421	1	0	0	0	1	0	0	0	warning	5	2.5
Cis-4,7,10,13,16,19-docosahexaenoic acid	6217-54-5	organic	liquid	328.49	Combi-Blocks	2023-01-02	https://sds.chemicalsafety.com/sds/pda/msds/getpdf.ashx?action=msdsdocument&auth=200C200C200C200C2008207A200D2078200C200C200C200C200C200C200C200C200C2008&param1=ZmRwLjFfMTMzMTcxMTNORQ==&unique=1678029027&session=60679ec97dfd8e96885c0cbe0e61b143&hostname=139.28.41.7	0				0	0	0	0	0	0	0		none	0
Methyl-trioctylammonium bis(trifluoromethylsulfonyl)imide	375395-33-8	organic	ionic liquid	648.85	Sigma-Aldrich	2022-06-10	https://sds.chemicalsafety.com/sds/pda/msds/getpdf.ashx?action=msdsdocument&auth=200C200C200C200C2008207A200D2078200C200C200C200C200C200C200C200C200C2008&param1=ZmRwLjFfMzgwOTc2MDNORQ==&unique=1677963666&session=0e1da735f43fe643971f4dc37256385c&hostname=78.8.217.118	0	0	0	0	0	0	0	0	0	0	0	0	none	0	0
Methyl-trioctylammonium bis(trifluoromethylsulfonyl)imide	375395-33-8	organic	ionic liquid	648.85	Combi-Blocks	2023-01-02	https://sds.chemicalsafety.com/sds/pda/msds/getpdf.ashx?action=msdsdocument&auth=200C200C200C200C2008207A200D2078200C200C200C200C200C200C200C200C200C2008&param1=ZmRwLjFfODI4NTQxMTNORQ==&unique=1677963755&session=0e1da735f43fe643971f4dc37256385c&hostname=78.8.217.118	0				0	0	0	0	0	0	0		none	0
Tetrabutylammonium chloride	1112-67-0	organic	ionic liquid	277.9	Combi-Blocks	2023-01-02	https://sds.chemicalsafety.com/sds/pda/msds/getpdf.ashx?action=msdsdocument&auth=200C200C200C200C2008207A200D2078200C200C200C200C200C200C200C200C200C2008&param1=ZmRwLjFfNTA5MDAxMTNORQ==&unique=1677963745&session=0e1da735f43fe643971f4dc37256385c&hostname=78.8.217.118	1.5	0.75	1.06066	141.421	2	0	2	0	0	0	1	0.5	warning	7	3.5
Tetrabutylammonium chloride	1112-67-0	organic	ionic liquid	277.9	Sigma-Aldrich	2022-05-25	https://sds.chemicalsafety.com/sds/pda/msds/getpdf.ashx?action=msdsdocument&auth=200C200C200C200C2008207A200D2078200C200C200C200C200C200C200C200C200C2008&param1=ZmRwLjFfMzE3NzgwMDNORQ==&unique=1677963748&session=0e1da735f43fe643971f4dc37256385c&hostname=78.8.217.118	0				0	0	0	0	0	0	0		none	0
Tetrabutylammonium iodide	311-28-4	organic	ionic liquid	369.37	Sigma-Aldrich	2020-01-15	https://sds.chemicalsafety.com/sds/pda/msds/getpdf.ashx?action=msdsdocument&auth=200C200C200C200C2008207A200D2078200C200C200C200C200C200C200C200C200C2008&param1=ZmRwLjFfNTAwMjIyMjNORQ==&unique=1677963943&session=0e1da735f43fe643971f4dc37256385c&hostname=78.8.217.118	0.25	1.25	1.41421	113.137	1	0	0	0	1	0	1	1	warning	4	9.5
Tetrabutylammonium iodide	311-28-4	organic	ionic liquid	369.37	Combi-Blocks	2023-01-02	https://sds.chemicalsafety.com/sds/pda/msds/getpdf.ashx?action=msdsdocument&auth=200C200C200C200C2008207A200D2078200C200C200C200C200C200C200C200C200C2008&param1=ZmRwLjFfMjg5NDUxMTNORQ==&unique=1677963939&session=0e1da735f43fe643971f4dc37256385c&hostname=78.8.217.118	2.25				4	0	2	1	1	0	1		warning	15
Tetra-n-pentylammonium iodide	2498-20-6	organic	ionic liquid/solid	425.5	Combi-Blocks	2023-01-02	https://sds.chemicalsafety.com/sds/pda/msds/getpdf.ashx?action=msdsdocument&auth=200C200C200C200C2008207A200D2078200C200C200C200C200C200C200C200C200C2008&param1=ZmRwLjFfOTcxMTYxMTNORQ==&unique=1677964652&session=0e1da735f43fe643971f4dc37256385c&hostname=78.8.217.118	2	1	1.41421	141.421	3	0	2	1	0	0	1	0.5	warning	13	6.5
Tetra-n-pentylammonium iodide	2498-20-6	organic	ionic liquid/solid	425.5	Thermo Fisher	2020-02-14	https://sds.chemicalsafety.com/sds/pda/msds/getpdf.ashx?action=msdsdocument&auth=200C200C200C200C2008207A200D2078200C200C200C200C200C200C200C200C200C2008&param1=ZmRwLjFfNDI3NzAzMTNORQ==&unique=1677964653&session=0e1da735f43fe643971f4dc37256385c&hostname=78.8.217.118	0				0	0	0	0	0	0	0		none	0
Tetrapentylammonium bromide	866-97-7	organic	ionic liquid	378.47	Sigma-Aldrich	2020-01-15	https://sds.chemicalsafety.com/sds/pda/msds/getpdf.ashx?action=msdsdocument&auth=200C200C200C200C2008207A200D2078200C200C200C200C200C200C200C200C200C2008&param1=ZmRwLjFfNzE1MjIyMjNORQ==&unique=1677965282&session=0e1da735f43fe643971f4dc37256385c&hostname=78.8.217.118	2	2	0	0	3	0	2	1	0	0	1	1	warning	13	13
Tetrapentylammonium bromide	866-97-7	organic	ionic liquid	378.47	Combi-Blocks	2023-01-02	https://sds.chemicalsafety.com/sds/pda/msds/getpdf.ashx?action=msdsdocument&auth=200C200C200C200C2008207A200D2078200C200C200C200C200C200C200C200C200C2008&param1=ZmRwLjFfNzIzMDQxMTNORQ==&unique=1677965282&session=0e1da735f43fe643971f4dc37256385c&hostname=78.8.217.118	2				3	0	2	1	0	0	1		warning	13
Tetra-n-butylammonium trifluoromethanesulfonate	35895-70-6	organic	ionic liquid	391.5	Combi-Blocks	2023-01-02	https://sds.chemicalsafety.com/sds/pda/msds/getpdf.ashx?action=msdsdocument&auth=200C200C200C200C2008207A200D2078200C200C200C200C200C200C200C200C200C2008&param1=ZmRwLjFfMDcyOTIxMTNORQ==&unique=1677965639&session=0e1da735f43fe643971f4dc37256385c&hostname=78.8.217.118	2	2.5	0.707107	28.2843	3	0	2	1	0	0	1	1	warning	13	13.5
Tetra-n-butylammonium trifluoromethanesulfonate	35895-70-6	organic	ionic liquid	391.5	Thermo Fisher	2020-02-14	https://sds.chemicalsafety.com/sds/pda/msds/getpdf.ashx?action=msdsdocument&auth=200C200C200C200C2008207A200D2078200C200C200C200C200C200C200C200C200C2008&param1=ZmRwLjFfNTQxODAzMTNORQ==&unique=1677965639&session=0e1da735f43fe643971f4dc37256385c&hostname=78.8.217.118	3				4	1	2	1	0	0	1		warning	14
Tetra-n-octylammonium bromide	14866-33-2	organic	ionic liquid	546.8	Combi-Blocks	2023-01-02	https://sds.chemicalsafety.com/sds/pda/msds/getpdf.ashx?action=msdsdocument&auth=200C200C200C200C2008207A200D2078200C200C200C200C200C200C200C200C200C2008&param1=ZmRwLjFfODYxMTQyMTNORQ==&unique=1677966047&session=0e1da735f43fe643971f4dc37256385c&hostname=78.8.217.118	2	2.5	0.707107	28.2843	3	0	2	1	0	0	1	1	warning	13	13.5
Tetra-n-octylammonium bromide	14866-33-2	organic	ionic liquid	546.8	Thermo Fisher	2020-02-14	https://sds.chemicalsafety.com/sds/pda/msds/getpdf.ashx?action=msdsdocument&auth=200C200C200C200C2008207A200D2078200C200C200C200C200C200C200C200C200C2008&param1=ZmRwLjFfMzI3NzAzMTNORQ==&unique=1677966048&session=0e1da735f43fe643971f4dc37256385c&hostname=78.8.217.118	3				4	1	2	1	0	0	1		warning	14
Tetrapropylammonium chloride	5810-42-4	organic	ionic liquid	221.81	Sigma-Aldrich	2020-01-20	https://sds.chemicalsafety.com/sds/pda/msds/getpdf.ashx?action=msdsdocument&auth=200C200C200C200C2008207A200D2078200C200C200C200C200C200C200C200C200C2008&param1=ZmRwLjFfNTgzMTg2MDNORQ==&unique=1677966176&session=0e1da735f43fe643971f4dc37256385c&hostname=78.8.217.118	2	2	0	0	3	0	2	1	0	0	1	1	warning	13	13
Tetrapropylammonium chloride	5810-42-4	organic	ionic liquid	221.81	Combi-Blocks	2023-01-02	https://sds.chemicalsafety.com/sds/pda/msds/getpdf.ashx?action=msdsdocument&auth=200C200C200C200C2008207A200D2078200C200C200C200C200C200C200C200C200C2008&param1=ZmRwLjFfMTc4MjIxMTNORQ==&unique=1677966176&session=0e1da735f43fe643971f4dc37256385c&hostname=78.8.217.118	2				3	0	2	1	0	0	1		warning	13
Tetrabutylammonium acetate	10534-59-5	organic	ionic liquid	301.51	Sigma-Aldrich	2021-04-20	https://sds.chemicalsafety.com/sds/pda/msds/getpdf.ashx?action=msdsdocument&auth=200C200C200C200C2008207A200D2078200C200C200C200C200C200C200C200C200C2008&param1=ZmRwLjFfMjEzNDgxMjNORQ==&unique=1677966859&session=0e1da735f43fe643971f4dc37256385c&hostname=78.8.217.118	2	2	0	0	3	0	2	1	0	0	1	1	warning	13	13
Tetrabutylammonium acetate	10534-59-5	organic	ionic liquid	301.51	Combi-Blocks	2023-01-02	https://sds.chemicalsafety.com/sds/pda/msds/getpdf.ashx?action=msdsdocument&auth=200C200C200C200C2008207A200D2078200C200C200C200C200C200C200C200C200C2008&param1=ZmRwLjFfNjA3MDExMTNORQ==&unique=1677966857&session=0e1da735f43fe643971f4dc37256385c&hostname=78.8.217.118	2				3	0	2	1	0	0	1		warning	13
Tetrabutylammonium 4-toluenesulfonate	7182-86-7	organic	ionic liquid	413.7	Combi-Blocks	2023-01-02	https://sds.chemicalsafety.com/sds/pda/msds/getpdf.ashx?action=msdsdocument&auth=200C200C200C200C2008207A200D2078200C200C200C200C200C200C200C200C200C2008&param1=ZmRwLjFfNTIzOTYxMTNORQ==&unique=1677967116&session=0e1da735f43fe643971f4dc37256385c&hostname=78.8.217.118	2	2	0	0	3	0	2	1	0	0	1	1	warning	13	13
[truncated: 398 more rows]

## Sheet: RGBsynt - O-alkylation old
RGBsynt
			R1: Yield	R2: Purity	G1/B1: E-factor	G2: ChlorTox	B2: Time-efficiency	G3/B3: Energy
	Reference (average)		66.5	97.8333	326.783	200.097	15.8333	91.3154
	Method 1	Mech. O1	83	99	158.049	40.5252	3.41667	46.2106
	Method 2	Sol. O1	62	96	499.702	360.039	28.25	138.192
	Method 3	Mech. O2	65	100	131.434	37.1891	3.41667	46.2106
[truncated: 178 more rows]

## Sheet: RGBsynt - N-alkylation old
RGBsynt
[truncated: 183 more rows]

## Sheet: RGBsynt - SNAr old
RGBsynt
[truncated: 183 more rows]

## Sheet: RGBsynt - Sulfonylation old
RGBsynt
[truncated: 183 more rows]

## Sheet: RGBsynt - NEW
RGBsynt
[truncated: 183 more rows]
