# Supplementary material for: Comparison of greenness and whiteness of selected mechanochemical and solution-based reactions using a new RGBsynt model
Source: Royal Society of Chemistry journal article supplement (doi:10.1039/d4gc05097e), 2024-12-23
Supplement: d4gc05097e2.pdf [file d4gc05097e2.pdf]

## Supplementary Material

### Comparison of greenness and whiteness of selected mechanochemical and solution-based reactions using a new RGBsynt model

Paweł Mateusz Nowak<sup>\*a</sup>, Michał Kamiński<sup>b</sup>, Wojciech Trybała<sup>b</sup>, Vittorio Canale<sup>\*b</sup>, Paweł Zajdel<sup>b</sup>

<sup>a</sup> Jagiellonian University in Kraków, Faculty of Chemistry, Department of Analytical Chemistry, Laboratory of Forensic Chemistry, Gronostajowa St. 2, 30-387 Kraków, Poland

<sup>b</sup> Jagiellonian University Medical College, Faculty of Pharmacy, Department of Organic Chemistry, Medyczna St. 9, 30-688 Kraków, Poland

Corresponding author: Paweł Mateusz Nowak, e-mail: [pm.nowak@uj.edu.pl](mailto:pm.nowak@uj.edu.pl)

Vittorio Canale, e-mail: [vittorio.canale@uj.edu.pl](mailto:vittorio.canale@uj.edu.pl)

## Table of content

|                                                                                                |    |
|------------------------------------------------------------------------------------------------|----|
| 1. Mechanochemical and solution-based synthesis procedures                                     | 3  |
| 2. Characterization data for compounds synthesized by newly reported mechanochemical protocols | 8  |
| 3. <sup>1</sup> H-NMR spectra of newly synthesized compounds using mechanochemistry            | 10 |
| 4. Data related to the literature study                                                        | 13 |
| 5. Input data on the assessment with the RGBsynt<br>40                                         |    |
| 6. Guidelines for the categorization of electrical instruments                                 | 42 |
| 7. Reference                                                                                   | 43 |

# 1. Mechanochemical and in-solution synthesis procedures

## General chemical methods

All commercially available reagents were of the highest purity, they were obtained from Fluorochem (Fluorochem Ltd, Hadfield, UK), Acros Organics (Thermo Fisher Scientific, Geel, Belgium), AmBeed (Ambeed, Inc., Arlington Heights, IL, USA) and Sigma-Aldrich (Merck Life Science Sp.z.o.o., Poznań, Poland). All mechanochemical reactions were carried out in a vibratory ball-mill Retsch Mixer Mill MM 400 (Retsch GmbH, Haan, Germany) operated at 30 Hz. Reactions were conducted in stainless steel or PTFE jars with a volume of 10 mL or 35 mL, containing one stainless steel ball ( $\Phi_{\text{ball}} = 1.5 \text{ cm}$ ). Milling load is defined as the sum of the mass of the reactants per free volume in the jar and was equal to 15, 45 or 90 mg/mL. Total mass of reagents used was 125 mg (10 mL jar) or alternatively 500 mg, 1.5 g or 3 g (in 35 mL jar). All of the reactions using vibratory ball-mill were performed under air and ambient temperature.

HPLC analysis were performed by using Arc HPLC Core System (Waters Corporation, Milford, MA, USA) equipped with a UV/Vis Waters 2998 PDA spectrophotometric detector. Spectra were analyzed in 200-800 nm range with 1.2 nm resolution. Chromatographic separations were carried out using a Chromolith SpeedROD RP 18 column;  $4.6 \times 50 \text{ mm}$  and  $1.7 \mu\text{m}$  particle size. The column was maintained at  $40^\circ\text{C}$ , and eluted under gradient conditions from 95% to 0% of eluent A over 3 min, at a flow rate of 3 mL/min. Eluent A was water/formic acid (0.1%, v/v); eluent B was acetonitrile/formic acid (0.1%, v/v).

Mass spectra were recorded using a UPLC-MS/MS system consisted of a Waters Acquity Premier coupled to a Waters Xevo TQ-S Cronos mass spectrometer (electrospray ionization mode ESI). Chromatographic separations were carried out using the Acquity UPLC BEH (bridged ethylene hybrid) C18 column;  $2.1 \times 100 \text{ mm}$ , and  $1.7 \mu\text{m}$  particle size, equipped with Acquity UPLC BEH C18 VanGuard pre-column;  $2.1 \times 5 \text{ mm}$ , and  $1.7 \mu\text{m}$  particle size. The column was maintained at  $40^\circ\text{C}$ , and eluted under gradient conditions from 95% to 0% of eluent A over 10 min, at a flow rate of 0.3 mL/min. Eluent A was water/formic acid (0.1%, v/v); eluent B was acetonitrile/formic acid (0.1%, v/v). Chromatograms were recorded using Waters eλ PDA detector. Spectra were analysed in 200-500 nm range with 1.2 nm resolution and sampling rate 20 points/s. MS detection settings of Waters Xevo TQ-S Cronos mass spectrometer were as follows: source temperature  $150^\circ\text{C}$ , desolvation temperature  $350^\circ\text{C}$ , desolvation gas flow rate 600 L/h, cone gas flow 100 L/h, capillary potential 3.00 kV, cone potential 30 V. Nitrogen was used both as nebulizing and drying gas. The data were obtained in a scan mode ranging from 50 to 1000 m/z in 0.5 s time intervals. Data acquisition software was MassLynx V 4.2 (Waters).

$^1\text{H}$ -NMR spectra were recorded using a JEOL JNM-ECZR500 RS1 (ECZR version) at 500 MHz (JOEL Ltd., Tokyo, Japan), respectively, and reported in ppm using deuterated solvent for calibration ( $\text{CDCl}_3$  or  $\text{DMSO-}d_6$ ).

Melting points (Mp) were determined with M-560 Büchi apparatus and are uncorrected.

## General procedure for the mechanochemical *O*-alkylation of phenols with epichlorohydrin

Reactions were performed accordingly to previously reported procedure.<sup>1</sup> Different substituted phenol (1 equiv.) and previously grinded  $\text{K}_2\text{CO}_3$  (3 equiv.) were introduced in a 35 mL PTFE jar (milling load 10 mg/mL) with one stainless steel ball ( $\Phi_{\text{ball}} = 1.5 \text{ cm}$ ). Then epichlorohydrin (1.2 equiv.) was added. The reaction was carried out for 140 minutes at rt. The mixture was solubilized in  $\text{CH}_2\text{Cl}_2$  (15 mL) and the organic phase was washed with 2N NaOH aqueous solution ( $3 \times 5 \text{ mL}$ ) saturated NaCl solution ( $1 \times 5 \text{ mL}$ ), dried over  $\text{Na}_2\text{SO}_4$  and finally filtered and concentrated under reduced pressure.

## General procedure for the in-solution *O*-alkylation of phenols with epichlorohydrin

Reactions were performed accordingly to previously reported procedure.<sup>2</sup> Different substituted phenol (1 equiv.) and previously grinded  $\text{K}_2\text{CO}_3$  (2.5 equiv.), KOH (0.5 equiv.) were suspended in 20 mL of acetone. Next, epichlorohydrin (2 equiv.) was slowly dropped to the mixture which was stirred at  $60^\circ\text{C}$  for 24 hours. Then, the inorganic residues were filtered off and the mixture concentrated under vacuum followed by re-solubilization in  $\text{CH}_2\text{Cl}_2$  (20 mL) and washed with 2N NaOH aqueous solution ( $3 \times 7 \text{ mL}$ ) and saturated NaCl solution ( $1 \times 7 \text{ mL}$ ). The organic phase was dried over  $\text{Na}_2\text{SO}_4$ , filtered and concentrated under reduced pressure. The obtained crude product was purified on silica gel with ethyl acetate/hexane (1/9, v/v) as eluting system.

### General procedure for the mechanochemical *N*-alkylation of Boc-protected 4-aminopiperidine with oxirane

Reaction was performed accordingly to previously reported procedure.<sup>1</sup> 2-([1,1'-Biphenyl]-2-yloxy)methyl oxirane (424.5 mg, 1.88 mmol, 1 equiv.) and Boc-*N*-4-aminopiperidine (375.5 mg, 1.88 mmol, 1 equiv.) were introduced in a 35 mL PTFE jar (milling load 25 mg/mL) with one stainless steel ball ( $\phi_{\text{ball}} = 1.5$  cm) followed by addition of EtOH (80  $\mu\text{L}$ ,  $\eta = 0.1$   $\mu\text{L}\cdot\text{mg}^{-1}$ ) as liquid assistant. The reaction was carried out for 70 minutes at rt. Then, the product was solubilized in ethyl acetate (30 mL) and the organic phase was washed with  $\text{KHSO}_4$  aqueous solution at pH = 3.5 (3  $\times$  10 mL), saturated NaCl solution (1  $\times$  10 mL), dried over  $\text{Na}_2\text{SO}_4$  and finally filtered and concentrated under reduced pressure yielding compound *tert*-butyl {1-[3-([1,1'-biphenyl]-2-yloxy)-2-hydroxypropyl]piperidin-4-yl}carbamate as white powder (704.3 mg, yield 88%).

### General procedure for the in-solution *N*-alkylation of Boc-protected 4-aminopiperidine with oxirane

Reaction was performed accordingly to previously reported procedure.<sup>2</sup> 4-Boc-*N*-aminopiperidine (0.85 g, 4.24 mmol, 1.2 equiv.) was dissolved in EtOH (15 mL), followed by addition of 2-([1,1'-biphenyl]-2-yloxy)methyl oxirane (0.8 g, 3.54 mmol, 1 equiv.) and the mixture was stirred under reflux for 4 hours. Inorganic residues were filtered off and organic mixture was concentrated under reduced pressure. The obtained crude product was purified using silica gel column chromatography with  $\text{CH}_2\text{Cl}_2/\text{MeOH}$  (9/1, v/v) as an eluting system yielding compound *tert*-butyl {1-[3-([1,1'-biphenyl]-2-yloxy)-2-hydroxypropyl]piperidin-4-yl}carbamate as white powder (1.17 g, yield = 78%).

### General procedure for the mechanochemical *N*-alkylation of Boc-protected alicyclic diamines with (aryloxy)ethylbromide

Reactions were performed accordingly to previously reported procedure.<sup>3</sup> Commercially available alkylating agent 7-(2-bromoethoxy)-2,2-dimethyl-2,3-dihydrobenzofuran (1 equiv.) and Boc-protected alicyclic diamine (1.2 equiv.) were introduced in two 35 mL PTFE jars (milling load 15 mg/mL) with one stainless steel ball ( $\phi_{\text{ball}} = 1.5$  cm), followed by the addition of previously ground  $\text{K}_2\text{CO}_3$  (3 equiv.) and KI (0.5 equiv.). The reaction was carried out for 210 min at rt. Then, the product was solubilized in  $\text{CH}_2\text{Cl}_2$  (25 mL), and the organic phase was washed with  $\text{KHSO}_4$  aqueous solution at pH = 3.5 (3  $\times$  10 mL) and saturated NaCl solution (1  $\times$  10 mL), dried over  $\text{Na}_2\text{SO}_4$ , and finally filtered and concentrated under reduced pressure.

### General procedure for the in-solution *N*-alkylation of Boc-protected alicyclic diamines with (aryloxy)ethylbromide

Reactions were performed accordingly to previously reported procedure.<sup>4</sup> Commercial and Boc-protected alicyclic diamine (1 equiv.) was dissolved in acetone (15 mL). Then  $\text{K}_2\text{CO}_3$  (3 equiv.) and catalytic amount of KI were added followed by dropwise addition of 7-(2-bromoethoxy)-2,2-dimethyl-2,3-dihydrobenzofuran (1.2 equiv.). The reaction was refluxed for 24 h. Inorganic residues were filtered off and organic mixture was concentrated under reduced pressure. The obtained crude product was purified using silica gel with  $\text{CH}_2\text{Cl}_2/\text{MeOH}$  as an eluting system.

### General procedure for the mechanochemical nucleophilic aromatic substitution of (arylsulfonyl)isoindolines with piperazine

Reactions were performed accordingly to previously reported procedure.<sup>5</sup> Different substituted(arylsulfonyl)isoindolines (1 equiv.) and anhydrous piperazine (3 equiv.) were introduced in a 10 mL stainless steel jar (milling load 10 mg/mL) with one stainless steel ball ( $\phi_{\text{ball}} = 1.5$  cm) followed by the addition of MeCN (34  $\mu\text{L}$ ,  $\eta = 0.4$   $\mu\text{L}\cdot\text{mg}^{-1}$ ) or DMSO (42  $\mu\text{L}$ ,  $\eta = 0.54$   $\mu\text{L}\cdot\text{mg}^{-1}$ ) as a liquid assistant. The reaction was carried out for 1.5 h at 50 °C or 80 °C. After the addition of cold water (5 mL), the resulting mixture was transferred into a filtration funnel, washed with distilled water, and dried under reduced pressure. The products were purified via crystallization in ethanol.

### General procedure for the in-solution nucleophilic aromatic substitution of (arylsulfonyl)isoindolines with piperazine

Different substituted (arylsulfonyl)isoindolines (1 equiv.) and anhydrous piperazine (6 equiv.) were solubilized in DMSO (8 mL). The reaction was carried out for 3 days at 90 °C. After the addition of cold water (10 mL), the resulting mixture was transferred into a filtration funnel, washed with distilled water, and dried under reduced pressure. The crude mixture was purified using silica gel column chromatography with CH<sub>2</sub>Cl<sub>2</sub>/MeOH (9/1, v/v).

### General procedure for the mechanochemical sulfonylation of aliphatic primary amines with arylsulfonyl chlorides

Reactions were performed accordingly to previously reported procedure.<sup>1,3</sup> Aliphatic primary amine (1 equiv.), arylsulfonyl chloride (1 equiv.), and previously grinded K<sub>2</sub>CO<sub>3</sub> (1 or 2 equiv.) were introduced in a 35 mL PTFE jar (milling load 15 or 25 mg/mL) with one stainless steel ball ( $\phi_{\text{ball}} = 1.5$  cm). The reaction was carried out for 1–5 min at rt. Then, the crude mixture was solubilized in ethyl acetate (25 mL) and the organic phase was washed with KHSO<sub>4</sub> aqueous solution at pH = 3.5 (3 × 10 mL), saturated NaCl solution (1 × 10 mL), dried over Na<sub>2</sub>SO<sub>4</sub> and finally filtered and concentrated under vacuum.

### General procedure for the mechanochemical sulfonylation of alicyclic secondary amines with arylsulfonyl chlorides

Reactions were performed accordingly to previously reported procedure.<sup>5</sup> Isoindoline derivative (1 equiv.), different fluoro-substituted benzenesulfonyl chloride (1.1 equiv.), and NaOH (3 equiv.) were introduced in a 35 mL SS jar (milling load 10 mg/mL) with one SS ball ( $\phi_{\text{ball}} = 1.5$  cm). The reaction was carried out for 5–7 min at rt. The mixture was transferred into a filtration funnel, washed with distilled water, and dried under reduced pressure.

### General procedure for the in-solution sulfonylation of aliphatic primary and secondary amines with arylsulfonyl chlorides

Reactions were performed accordingly to previously reported procedure.<sup>2</sup> A mixture of amine (1 equiv.) in CH<sub>2</sub>Cl<sub>2</sub> (4 mL), and TEA (3 equiv.) was cooled down (ice bath), and selected arylsulfonyl chloride (1.2 equiv.) was added in one portion. The reaction mixture was stirred for 2 hours under cooling. Then, the solvent was evaporated, and the crude mixture was purified using silica gel column chromatography with CH<sub>2</sub>Cl<sub>2</sub>/MeOH as an eluting system.

### Newly developed procedure for the mechanochemical O-alkylation of 1-naphthol with epichlorohydrin

1-Naphthol (152.28 mg, 1.056 mmol, 1 equiv.) and sodium tert-butoxide (152.26 mg, 1.584 mmol, 1.5 equiv.) were introduced in 35 mL stainless steel jar, charged with a stainless steel ball ( $\phi_{\text{ball}} = 1.5$  cm), and milled for 15 minutes. Subsequently epichlorohydrin (195.45 mg, 2.113 mmol, 2 equiv.) and K<sub>2</sub>CO<sub>3</sub> (2 g) were added (milling load = 75 mg/mL) and milled for 90 minutes at room temperature. The resulting mixture was then solubilized in ethyl acetate (15 mL) and the organic layer was washed with 2M NaOH solution (3 × 5 mL), saturated solution of NaCl (2 × 3 mL), dried over Na<sub>2</sub>SO<sub>4</sub>, filtered, and concentrated under reduced pressure yielding 2-[(naphthalen-1-yloxy)methyl]oxirane as yellow oil (181.89 mg, yield = 86%).

### Synthesis procedure for the in-solution O-alkylation of 1-naphthol with epichlorohydrin

Reaction was performed accordingly to previously reported procedure.<sup>6</sup> Transfer 7.2 g (0.05 mol) of 1-naphthol, 5 g KOH to a round-bottom flask and add ethanol/H<sub>2</sub>O (9:1), the mixture was stirred for 30 min at room temperature. After dissolution, add dropwise 12 mL (0.15 moles) epichlorohydrin slowly in 45 min and stirring was continued at room temperature for 7 h. The reaction is left under magnetic stirring at room temperature for 45 min. TLC is carried out in an eluent system (hexane/ethyl acetate 9:1) to monitor the end of the reaction. The reaction was finished with H<sub>2</sub>O (50 mL) and extracted with chloroform (2×75 mL). The combined organic layers

were washed with water (5×100 mL) and sodium hydroxide solution (2×30 mL), and dried over sodium sulfate. Remove ethanol by vacuum evaporator and to give the glycidyl- $\alpha$ -naphthyl ether in 96% yield. Extract aqueous phase with ethyl ether. The ethyl ether extract is dried with anhydrous sodium sulfate. Filter and remove solvent to obtain the crude brown oil

#### Newly developed procedure for the mechanochemical *N*-alkylation of propan-2-amine with 2-[(naphthalen-1-yloxy)methyl]oxirane for obtaining propranolol

2-[(Naphthalen-1-yloxy)methyl]oxirane (229.28 mg, 1.145 mmol, 1 equiv.), propan-2-amine (270.72 mg, 4.580 mmol, 4 equiv.) and NaCl (0.75 g) were introduced in 35 mL stainless steel jar (milling load = 38 mg/mL), charged with a stainless steel ball ( $\phi_{\text{ball}}$  = 1.5 cm), and milled for 90 minutes at room temperature. Then, a second and third portion of isopropylamine was added and reaction was left milling for another 90 minutes. Next, the resulting mixture was solubilized in saturated solution of NaHCO<sub>3</sub> (6 mL) and extracted with ethyl acetate (3 × 6 mL). The organic layer was washed with saturated solution of NaCl (2 × 3 mL), dried over Na<sub>2</sub>SO<sub>4</sub>, filtered, and concentrated under reduced pressure yielding 1-(isopropylamino)-3-(naphthalen-1-yloxy) propan-2-ol (propranolol) as white powder (279.14 mg, yield = 94%).

#### Synthesis procedure for the in-solution *N*-alkylation of propan-2-amine with 2-[(naphthalen-1-yloxy)methyl]oxirane for obtaining propranolol

Reaction was performed accordingly to previously reported procedure.<sup>7</sup> 1.05 g of 2-[(Naphthalen-1-yloxy)methyl]oxirane dissolved in 10 mL of methanol was added to 15 mL of propan-2-amine (12 mM) and stirred at 45°C until obtaining the yellow-brown solution (48 h) and solution was cooled to 5°C. Then, 1.5 mL of HCl (2 M) was dropped slowly into the resulting mixture, followed by adding NaOH (2 M) until white precipitate appeared. The precipitate was washed by water, isolated by CC using a mixture of hexane/ethyl acetate (1/1, v/v). Finally, 0.738 g of 1-(isopropylamino)-3-(naphthalen-1-yloxy) propan-2-ol (compound 2) or propranolol was collected (yield = 54%).

#### Newly developed procedure for the mechanochemical *N*-alkylation of 1-benzo[*b*]thien-4-yl-piperazine with 7-(4-chlorobutoxy)quinolin-2(1*H*)-one for obtaining brexpiprazole

1-Benzo[*b*]thien-4-yl-piperazine hydrochloride (243.53 mg, 0.956 mmol, 1 equiv.), 7-(4-chlorobutoxy)quinolin-2(1*H*)-one (240.60 mg, 0.956 mmol, 1 equiv.) KI (15.87 mg, 0.096 mmol, 0.1 equiv.), and K<sub>2</sub>CO<sub>3</sub> (2 g) were introduced in 35 mL stainless steel jar (milling load = 75 mg/mL), charged with a stainless steel ball ( $\phi_{\text{ball}}$  = 1.5 cm), and milled for 90 minutes at room temperature. The resulting powder was washed with water (4 × 10 mL). The residue was suspended in mixture of ethanol, water and glacial acetic acid (2/3/0.05, v/v/v) and heated until completely dissolved. After cooling the clear liquid was poured into 10 mL of 5% NaOH solution, than the suspension was filtered and dried to obtain pure product (7-{4-[4-(1-benzothiophen-4-yl)piperazin-1-yl]butoxy}-quinolin-2(1*H*)-one, brexpiprazole) as white powder (389.57 mg, yield = 94%).

#### Synthesis procedure for the in-solution *N*-alkylation of 1-benzo[*b*]thien-4-yl-piperazine with 7-(4-chlorobutoxy)quinolin-2(1*H*)-one for obtaining brexpiprazole

Reaction was performed accordingly to previously reported procedure.<sup>8</sup> To a stirred suspension of 1-(1-benzothiophen-4-yl)piperazine hydrochloride (10.12 g, 0.040 mol), K<sub>2</sub>CO<sub>3</sub> (6 g, 0.042 mol), and KI (7 g, 0.042 mol) in DMF (80 mL) was added 7-(4-chlorobutoxy)quinolin-2(1*H*)-one (10.0 g, 0.040 mol) at room temperature. The reaction mass temperature was raised to 70 °C and maintained for 10 h. When reaction completion was observed by TLC/HPLC, the reaction was quenched by addition of water (50 mL). The solid thus precipitated was filtered and washed with water. The crude product was purified in a mixture of CH<sub>2</sub>Cl<sub>2</sub> and ethyl acetate, and the isolated solid was further purified by acid-base extraction. The purified product was dried in a vacuum oven at 60 °C to afford 7-{4-[4-(1-benzothiophen-4-yl)piperazin-1-yl]butoxy}-quinolin-2(1*H*)-one (brexpiprazole) as a white solid (14.9 g, yield = 84%).

### Newly developed procedure for the mechanochemical nucleophilic aromatic substitution to obtain key intermediate for the synthesis of vortioxetine

1-Fluoro-2-nitrobenzene (72.26 mg, 0.512 mmol, 1 equiv.), 1-Boc-piperazine (286.18 mg, 1.536 mmol, 3 equiv.) and  $K_2CO_3$  (141.56 mg, 1.024 mmol, 2 equiv.) were introduced in 35 mL stainless steel jar (milling load = 15 mg/mL), charged with a stainless steel ball ( $\phi_{ball} = 1.5$  cm), and milled for 180 minutes at room temperature. The resulting mixture was then solubilized in ethyl acetate (15 mL) and the organic layer was washed with water ( $3 \times 5$  mL), dried over  $Na_2SO_4$ , filtered, and concentrated under reduced pressure yielding *tert*-butyl 4-(2-nitrophenyl)piperazine-1-carboxylate as yellow solid (149.54 mg, yield = 95%).

### Synthesis procedure for the in-solution nucleophilic aromatic substitution to obtain key intermediate for the synthesis of vortioxetine

Reaction was performed accordingly to previously reported procedure.<sup>9</sup> *N*-Boc-piperazine (2.64g, 14.20 mmol, 2 equiv.) and potassium carbonate (1.96g, 14.20 mmol, 2 eg) were suspended in dry DMSO (40 mL). The corresponding fluoronitrobenzene (1.00g, 7.10 mmol, 1 equiv.) was added and the suspension was refluxed at 80 °C for 72 h. The reaction mixture was cooled to ambient temperature and acidified with 2 N HCl to a pH of 1. Phases were separated. The aqueous phase was extracted with diethyl ether. The organic phases were combined, washed with ice water and brine, dried over anhydrous sodium sulfate and filtered. The solvent was evaporated in vacuo yielding the pure products as orange oil (2.07 g (95%)).

### Newly developed procedure for the mechanochemical sulfonylation of 2-aminopyridine with 4-nitrobenzenesulfonyl chloride to obtain key intermediate for the synthesis of sulfapyridine

Pyridin-2-amine (94.50 mg, 1.004 mmol, 1 equiv.), 4-nitrobenzenesulfonyl chloride (289.25 mg, 1.305 mmol, 1.3 equiv.) and  $K_2CO_3$  (416.26 mg, 3.012 mmol, 3 equiv.) were introduced in 35 mL stainless steel jar (milling load = 24 mg/mL), charged with a stainless steel ball ( $\phi_{ball} = 1.5$  cm), and milled for 15 minutes. The resulting powder was suspended in 10 mL of 5% HCl solution and then was filtered. The remaining residue was washed with water ( $2 \times 10$  mL) to yield desired 4-nitro-*N*-(pyridin-2-yl)benzenesulfonamide as yellow powder (241.13 mg, yield 86%).

### Synthesis procedure for the in-solution sulfonylation of 2-aminopyridine with 4-nitrobenzenesulfonyl chloride to obtain key intermediate for the synthesis of sulfapyridine

Reaction was performed accordingly to previously reported procedure.<sup>10</sup> A solution of benzenesulfonyl chloride (2.64 g, 12 mmol) was slowly added under an ice bath to a solution of 2-aminopyridine (0.94 g, 10 mmol) in pyridine. The mixture was stirred at room temperature for 1 h. Ice water was added and the mixture was stirred vigorously until a large amount of solid was precipitated. After filtration, the crude product was obtained with yellow solid (yield 73.0%)

## 2. Characterization data for compounds synthesized by newly reported mechanochemical protocols

### 2-[(Naphthalen-1-yloxy)methyl]oxirane [CAS: 2461-42-9]

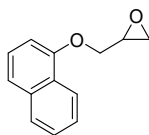

Yellow oil (181.89 mg, yield 86%). Molecular formula:  $C_{13}H_{12}O_2$ , MW: 200.24; monoisotopic mass: 200.08. UPLC/MS:  $t_R$  = 7.15 min, purity = 99%,  $[M+MeCN+H]^+$  = 242.2.  $^1H$ -NMR (500 MHz,  $CDCl_3$ )  $\delta$  ppm 2.85 (dd,  $J$  = 4.9, 2.7 Hz, 1H), 2.96 (t,  $J$  = 4.6 Hz, 1H), 3.49 (ddt,  $J$  = 5.6, 4.0, 2.9 Hz, 1H), 4.14 (dd,  $J$  = 11.0, 5.6 Hz, 1H), 4.39 (dd,  $J$  = 11.0, 3.1 Hz, 1H), 6.80 (d,  $J$  = 7.6 Hz, 1H), 7.34–7.38 (m, 1H), 7.45 (d,  $J$  = 8.3 Hz, 1H), 7.47–7.52 (m, 2H), 7.77–7.82 (m, 1H), 8.28–8.33 (m, 1H). Data in agreement with literature.<sup>6</sup>

### 1-(Isopropylamino)-3-(naphthalen-1-yloxy)propan-2-ol (Propanolol) [CAS: 525-66-6]

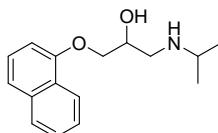

White powder (279.14 mg, yield 94%). Molecular formula:  $C_{16}H_{21}NO_2$ , MW: 259.35; monoisotopic mass: 259.16. UPLC/MS:  $t_R$  = 4.94 min, purity = 99%,  $[M+H]^+$  = 260.3.  $^1H$ -NMR (500 MHz,  $CDCl_3$ )  $\delta$  ppm 1.12 (dd,  $J$  = 6.2, 1.4 Hz, 6H), 2.83–2.98 (m, 4H), 3.01 (dd,  $J$  = 12.2, 3.4 Hz, 1H), 4.10–4.15 (m, 1H), 4.17–4.22 (m, 2H), 6.82 (d,  $J$  = 7.6 Hz, 1H), 7.33–7.38 (m, 1H), 7.41–7.45 (m, 1H), 7.45–7.50 (m, 2H), 7.77–7.81 (m, 1H), 8.22–8.25 (m, 1H). Mp: 97–99 °C. Data in agreement with literature.<sup>7</sup>

### 7-{4-[4-(Benzo[*b*]thiophen-4-yl)piperazin-1-yl]butoxy}quinolin-2(1*H*)-one (Brexpiprazole) [CAS: 913611-97-9]

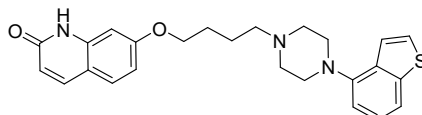

White powder (389.57 mg, yield 94%). Molecular formula:  $C_{25}H_{27}N_3O_2S$ , MW: 433.57; monoisotopic mass: 433.18. UPLC/MS:  $t_R$  = 5.46 min, purity = 99%,  $[M+H]^+$  = 434.2.  $^1H$ -NMR (500 MHz,  $CDCl_3$ )  $\delta$  ppm 1.72–1.80 (m, 2H), 1.84–1.92 (m, 2H), 2.51–2.57 (m, 2H), 2.73 (br. s., 4H), 3.19 (br. s., 4H), 4.10 (t,  $J$  = 6.3 Hz, 2H), 6.52–6.56 (m, 1H), 6.80 (dd,  $J$  = 8.7, 2.3 Hz, 1H), 6.85 (d,  $J$  = 2.2 Hz, 1H), 6.87–6.90 (m, 1H), 7.23–7.28 (m, 1H), 7.36–7.38 (m, 1H), 7.39–7.45 (m, 2H), 7.53 (d,  $J$  = 8.0 Hz, 1H), 7.71 (d,  $J$  = 9.4 Hz, 1H), 12.50 (br. s., 1H). Mp: 180–182 °C. Data in agreement with literature.<sup>8</sup>

### *Tert*-butyl 4-(2-nitrophenyl)piperazine-1-carboxylate [CAS: 170017-73-9]

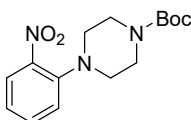

Orange oil (149.54 mg, yield 95%). Molecular formula:  $C_{15}H_{21}N_3O_4$ , MW: 307.35; monoisotopic mass: 307.15. UPLC/MS:  $t_R$  = 9.52 min, purity = 97%,  $[M+H]^+$  = 308.2.  $^1H$ -NMR (500 MHz,  $CDCl_3$ )  $\delta$  ppm 1.46 (s, 9H), 3.00 (br. s., 4H), 3.53–3.61 (m, 4H), 7.08 (d,  $J$  = 0.8 Hz, 1H), 7.13 (dd,  $J$  = 8.3, 1.2 Hz, 1H), 7.44–7.51 (m, 1H), 7.77 (dd,  $J$  = 8.1, 1.6 Hz, 1H). Data in agreement with literature.<sup>9</sup>

4-Nitro-*N*-(pyridin-2-yl)benzenesulfonamide [CAS: 1028-11-1]

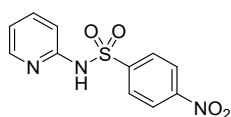

Yellow powder (241.13 mg, yield 86%). Molecular formula: C<sub>11</sub>H<sub>9</sub>N<sub>3</sub>O<sub>4</sub>S, MW: 279.27; monoisotopic mass: 279.03. UPLC/MS: *t*<sub>R</sub> = 4.78 min, purity = 100%, [M+H]<sup>+</sup> = 280.1. <sup>1</sup>H-NMR (500 MHz, DMSO-*d*<sub>6</sub>) δ ppm 6.83 (br. s., 1H), 7.23 (d, *J* = 6.5 Hz, 1H), 7.78 (br. s., 1H), 7.91 (br. s., 1H), 8.05 (d, *J* = 6.4 Hz, 2H), 8.30 (d, *J* = 6.7 Hz, 2H), 12.99 (br. s., 1H). Mp: 183–184 °C. Data in agreement with literature.<sup>10</sup>

### 3. $^1\text{H}$ -NMR spectra of newly synthesized compounds using mechanochemistry

#### 2-[(Naphthalen-1-yloxy)methyl]oxirane (500 MHz, $\text{CDCl}_3$ )

VC-MK-83\_928\_07\_PROTON-1-1.esp

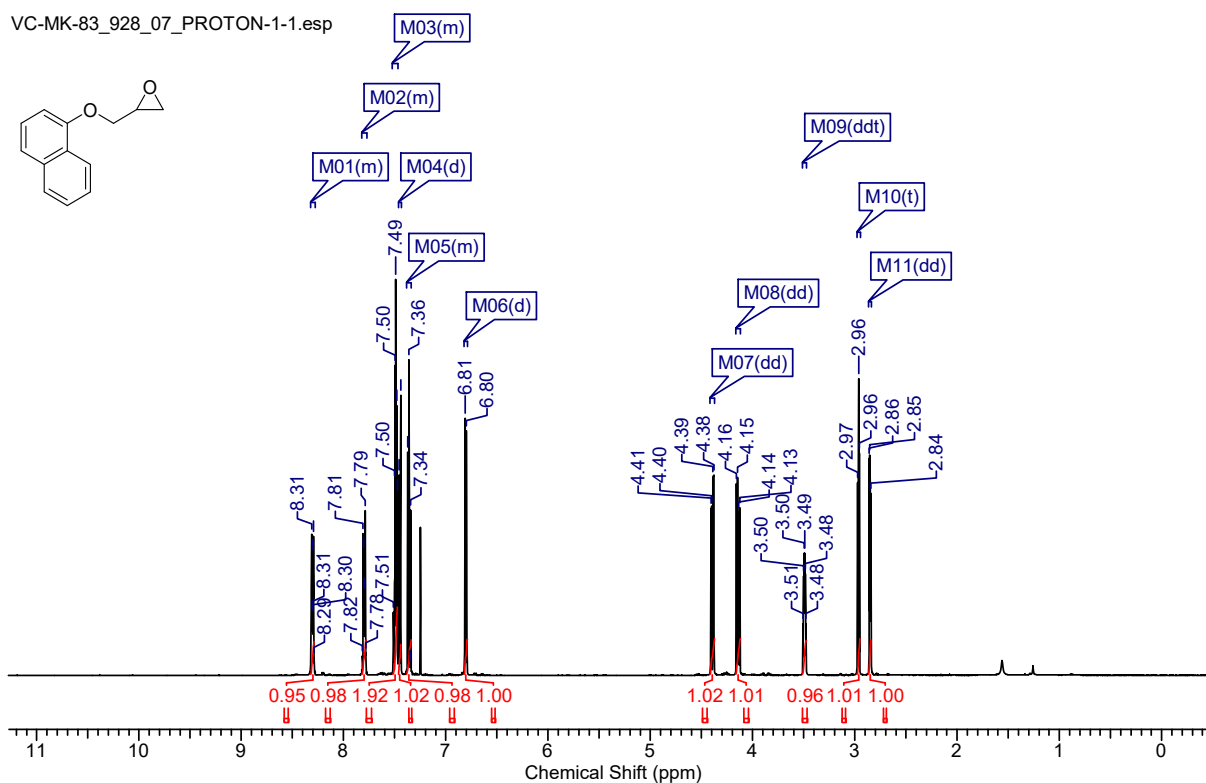

#### 1-(Isopropylamino)-3-(naphthalen-1-yloxy)propan-2-ol (Propanolol, 500 MHz, $\text{CDCl}_3$ )

VC-MK-86\_928\_07\_PROTON-1-1.esp

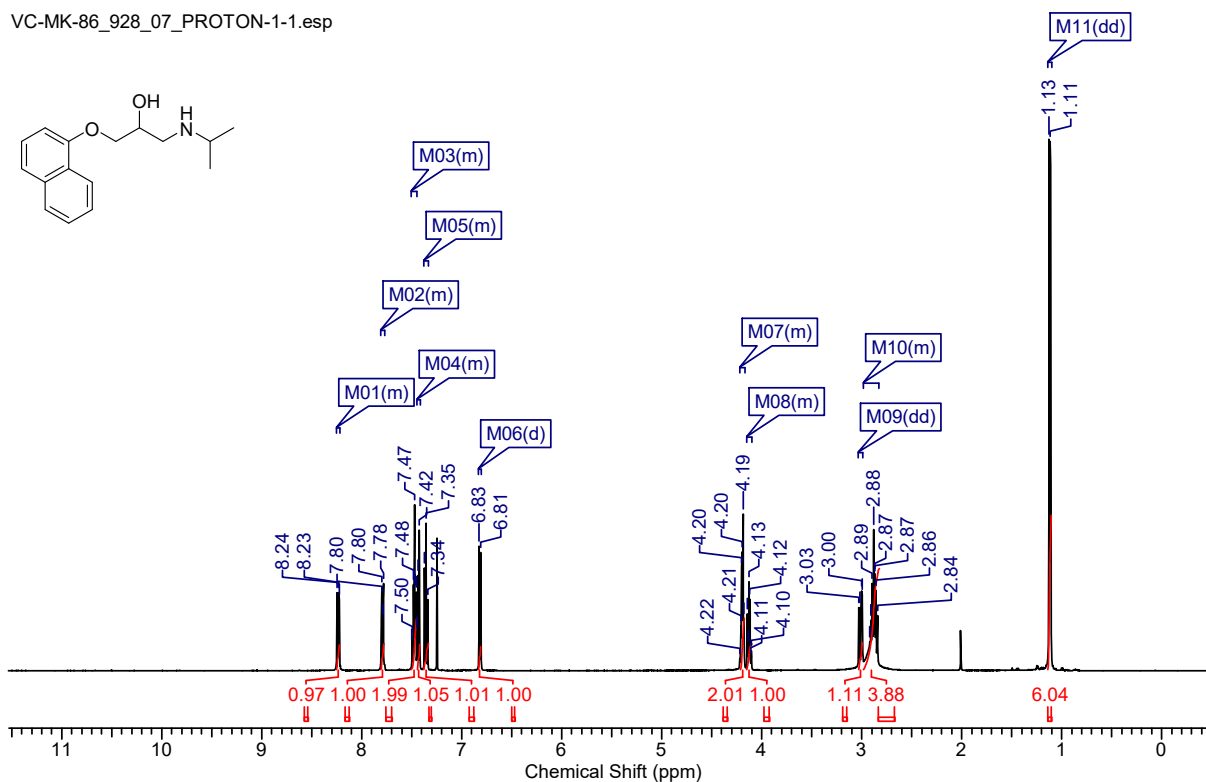

7-[4-[4-(Benzo[b]thiophen-4-yl)piperazin-1-yl]butoxy]quinolin-2(1H)-one (Brexpiprazole, 500 MHz, CDCl<sub>3</sub>)

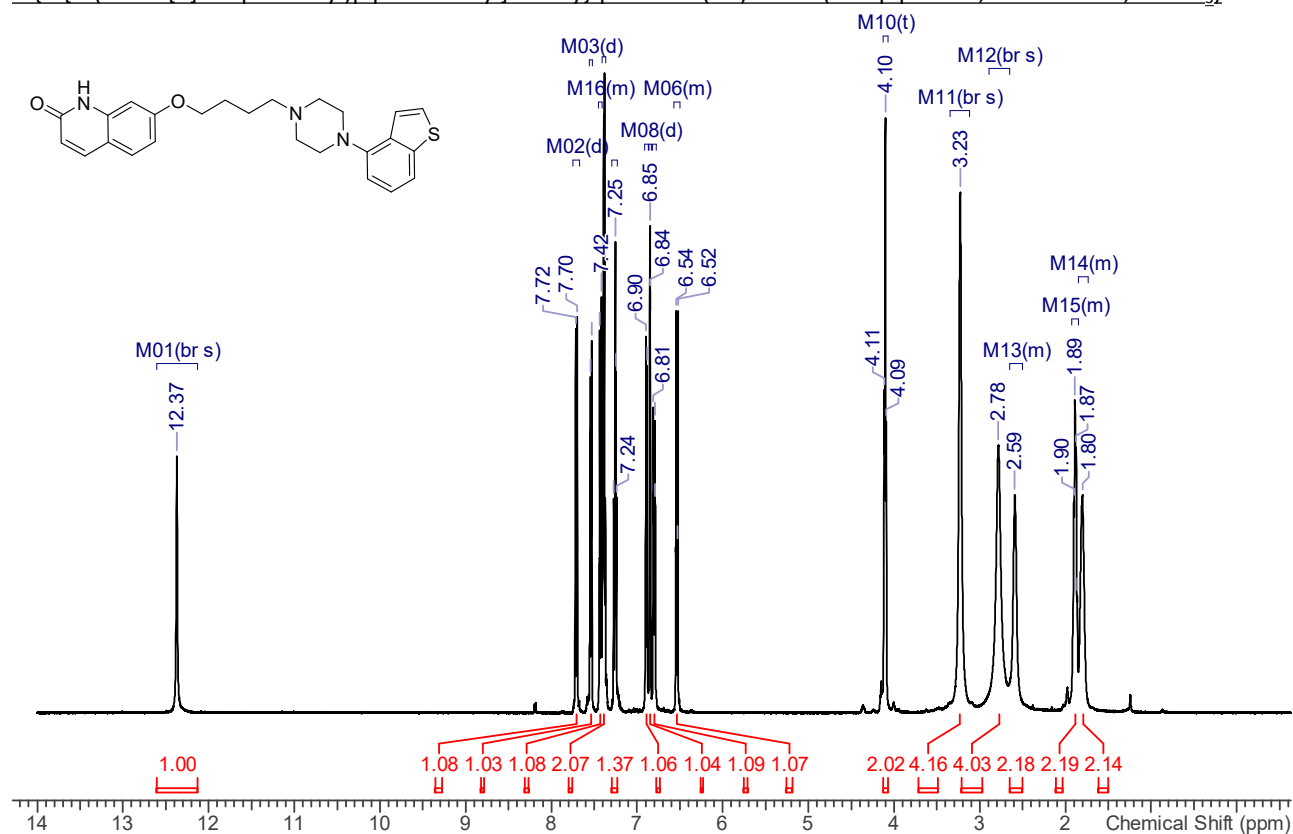

*Tert*-butyl 4-(2-nitrophenyl)piperazine-1-carboxylate (500 MHz, CDCl<sub>3</sub>)

VC-MK-98\_928\_07\_PROTON-1-1.esp

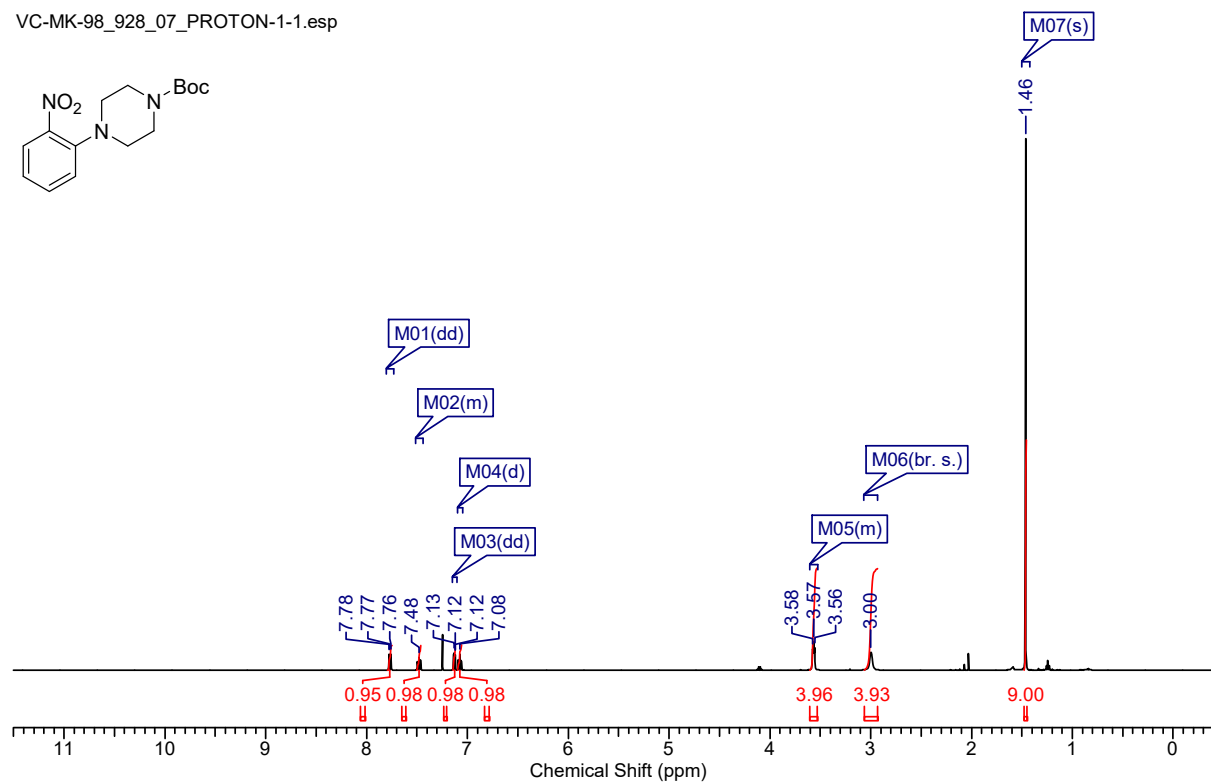

4-Nitro-*N*-(pyridin-2-yl)benzenesulfonamide (500 MHz, DMSO-*d*<sub>6</sub>)

VC-KN-04\_928\_07\_PROTON-1-1.esp

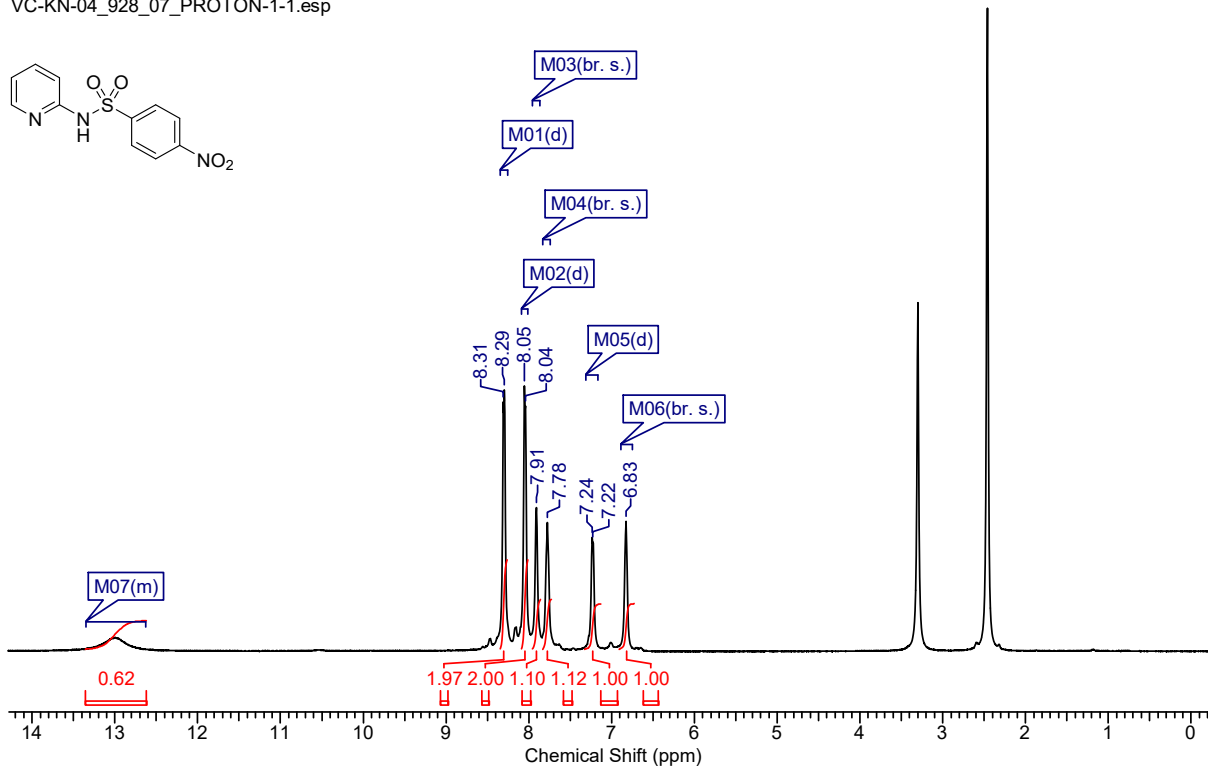

#### 4. Data related to the literature study

**Table 1-SI.** Literature review on reaction conditions for the alkylation of 2-substituted phenols with epichlorohydrine in solution.

| Products                                                                            | Reagents (equiv.)                                                                                    | Solvent                        | Temp./time  | Isolation procedure                                                                                           | Yields | Scale    | Reference |
|-------------------------------------------------------------------------------------|------------------------------------------------------------------------------------------------------|--------------------------------|-------------|---------------------------------------------------------------------------------------------------------------|--------|----------|-----------|
| 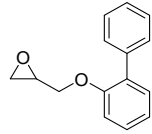   | phenol (1)<br>epichlorohydrine (12)<br>tetramethylammonium chloride(0.01)<br>NaOH (1)                | DMSO/<br>Toluene<br>(1/4, v/v) | 100 °C/1 h  | Dilution (hexane and DCM)<br>Acidification with 1M HCl<br>Washing (H <sub>2</sub> O)<br>Concentration         | 90     | 119.64 g | 11        |
| 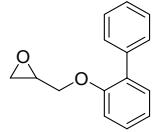   | phenol (1)<br>epichlorohydrine (3)<br>NaOH (1.2)                                                     | EtOH                           | 20 °C/9.5 h | Concentration<br>Extraction (EtOAc)<br>Washing with brine<br>Column chromatography<br>hexane/EtOAc (2/1, v/v) | 88     | 6.61 g   | 12        |
| 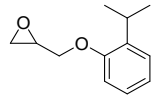   | phenol (1)<br>epichlorohydrine (2)<br>K <sub>2</sub> CO <sub>3</sub> (4)                             | Acetone                        | 80 °C/16 h  | Filtration<br>Column chromatography<br>petroleum ether/acetone<br>(100/1, v/v)                                | 81     | -        | 13        |
| 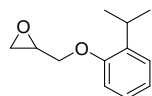   | phenol (1)<br>epichlorohydrine (4)<br>tetra(n-butyl)ammonium<br>hydrogensulfate (0.04)<br>NaOH (8.3) | H <sub>2</sub> O               | 25 °C/18 h  | Extraction (EtOAc)<br>Concentration<br>Column chromatography                                                  | 12     | 176 mg   | 14        |
| 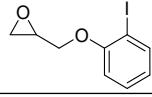 | phenol (1)<br>epichlorohydrine (3)<br>NaOH (1.4)                                                     | H <sub>2</sub> O               | 50 °C/2.5 h | Extraction (DCM)<br>Concentration<br>Distillation                                                             | 75     | 4.5 g    | 15<br>16  |
| 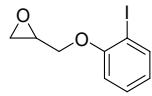 | phenol (1)<br>epichlorohydrine (1.5)<br>NaOH (1.6)                                                   | H <sub>2</sub> O               | 25° C/16 h  | Extraction (CHCl <sub>3</sub> )<br>Washing with H <sub>2</sub> O<br>Concentration<br>Distillation             | 45     | 2.5 g    | 17        |
| 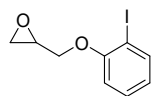 | phenol (1)<br>epichlorohydrine (5)<br>NaH (1.1)                                                      | DMF                            | 70 °C/2 h   | Concentration<br>Dissolution (CHCl <sub>3</sub> )<br>Washing with 10% NaOH, H <sub>2</sub> O<br>and brine     | 80     | 20.0 g   | 18        |

|                 |                                                                                         |                    |              |                                                                                                                                                                            |       |        |                                   |
|-----------------|-----------------------------------------------------------------------------------------|--------------------|--------------|----------------------------------------------------------------------------------------------------------------------------------------------------------------------------|-------|--------|-----------------------------------|
|                 |                                                                                         |                    |              | Concentration<br>Distillation                                                                                                                                              |       |        |                                   |
|                 | phenol (1)<br>epichlorohydrine (2)<br>Cs <sub>2</sub> CO <sub>3</sub> (1.2)             | ACN <sub>anh</sub> | 70 °C/12 h   | Dilution (H <sub>2</sub> O)<br>Extraction (Et <sub>2</sub> O)<br>Washing with brine<br>Concentration<br>Column chromatography<br>(hexane)                                  | -     | -      | 19                                |
|                 | phenol (1)<br>epichlorohydrine (3)<br>NaOH (1.4)                                        | H <sub>2</sub> O   | 50 °C /1.5 h | Dilution (H <sub>2</sub> O)<br>Extraction (EtOAc)<br>Washing with brine<br>Concentration<br>Column chromatography<br>Petroleum ether/EtOAc (78/22,<br>v/v)                 | 38    | 9.6 g  | 20                                |
| arithmetic mean |                                                                                         |                    |              |                                                                                                                                                                            | 63.71 |        |                                   |
| geometric mean  |                                                                                         |                    |              |                                                                                                                                                                            | 54.71 |        |                                   |
| median          |                                                                                         |                    |              |                                                                                                                                                                            | 77.50 |        |                                   |
|                 | Phenol (1)<br>Epichlorohydrine (2)<br>K <sub>2</sub> CO <sub>3</sub> (2.5)<br>KOH (0.5) | Acetone            | 60 °C/24 h   | Filtration<br>Condensation<br>Dissolution (DCM)<br>Washing with 2M NaOH aqueous<br>solution and brine<br>Concentration<br>Column chromatography<br>EtOAc/hexane (1/9, v/v) | 62    | 0.82 g | In-house<br>protocol <sup>1</sup> |
|                 | phenol (1)<br>epichlorohydrine (2)<br>K <sub>2</sub> CO <sub>3</sub> (2)<br>KI (0.015)  | Acetone            | 60 °C/24 h   | Filtration<br>Condensation<br>Column chromatography<br>EtOAc/hexane (1/9, v/v)                                                                                             | 40    | 0.56 g | In-house<br>protocol <sup>2</sup> |
|                 | phenol (1)<br>epichlorohydrine (2)<br>K <sub>2</sub> CO <sub>3</sub> (2)<br>KI (0.015)  | Acetone            | 60 °C/24 h   | Filtration<br>Condensation<br>Column chromatography<br>EtOAc/hexane (1/9, v/v)                                                                                             | 65    | 0.82 g | In-house<br>protocol <sup>2</sup> |

**Table 2-SI.** Literature review on reaction conditions for the *N*-alkylation of secondary amines in solution

| Products                                                                            | Reagents (equiv.)                                                                 | Solvent       | Temp./time  | Isolation procedure                                                                                                                                         | Yields | Scale   | Reference |
|-------------------------------------------------------------------------------------|-----------------------------------------------------------------------------------|---------------|-------------|-------------------------------------------------------------------------------------------------------------------------------------------------------------|--------|---------|-----------|
| 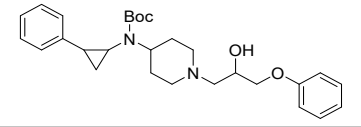   | Oxirane (1)<br>Amine (1)<br>K <sub>2</sub> CO <sub>3</sub> (2)                    | ACN           | 80 °C/14 h  | Filtration<br>Concentration<br>Column chromatography<br>PE/EtOAc (5/1, v/v)                                                                                 | 64     | 400 mg  | 21        |
| 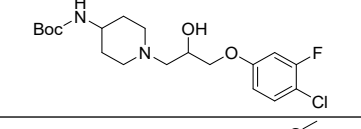   | Oxirane (1)<br>Amine (1)                                                          | DMF           | 100 °C/12 h | Dilution (H <sub>2</sub> O)<br>Precipitation<br>Filtration<br>Washing with H <sub>2</sub> O                                                                 | 99     | 1 g     | 22        |
| 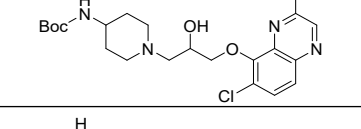   | Oxirane (1)<br>Amine (1)<br>K <sub>2</sub> CO <sub>3</sub> (2)                    | ACN           | 80 °C/72 h  | Concentration<br>Column chromatography (10% 2M NH <sub>3</sub> in MeOH/DCM)                                                                                 | 75     | 0.59 g  | 23        |
| 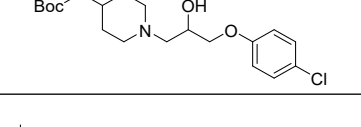   | Oxirane (2)<br>Amine (1)                                                          | DMF           | 100 °C/12 h | Dilution (H <sub>2</sub> O)<br>Precipitation<br>Filtration<br>Washing with H <sub>2</sub> O                                                                 | 73     | 0.7 g   | 22        |
| 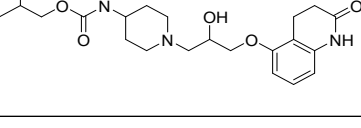  | Oxirane (1.1)<br>Amine (1)                                                        | <i>i</i> PrOH | 83 °C/24 h  | Dilution<br>Dissolution (EtOH)<br>Acidification (HCl in EtOH)<br>Filtration<br>Washing with ether                                                           | 60     | 3.2 g   | 24        |
| 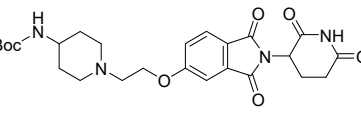 | Alkylating agent (1)<br>Amine (1)<br>K <sub>2</sub> CO <sub>3</sub> (3)<br>KI (1) | ACN           | 70 °C/2 h   | Dilution (H <sub>2</sub> O)<br>Extraction (DCM)<br>Reverse phase flash column chromatography ACN/0.1% formic acid in H <sub>2</sub> O, (0% to 100%)         | 70     | 1.402 g | 25        |
| 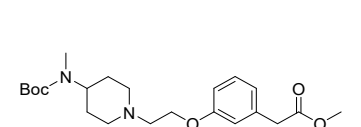 | Alkylating agent (1)<br>Amine (1.1)<br>K <sub>2</sub> CO <sub>3</sub> (1.4)       | DMF           | 25 °C/16 h  | Concentration<br>Dissolution (H <sub>2</sub> O and EtOAc)<br>Extraction<br>Washing with H <sub>2</sub> O and brine<br>Condensation<br>Column chromatography | 89     | 562 mg  | 26        |

|                                                                                     |                                                                                             |         |            |                                                                                                                  |       |         |    |
|-------------------------------------------------------------------------------------|---------------------------------------------------------------------------------------------|---------|------------|------------------------------------------------------------------------------------------------------------------|-------|---------|----|
| 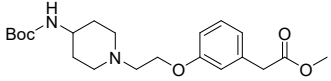   | Alkylating agent (1)<br>Amine (1)<br>DIPEA (2)                                              | DMF     | 25 °C/30 h | Dissolution (aqueous NaHCO <sub>3</sub> solution)<br>Extraction (EtOAc)<br>Condensation<br>Column chromatography | 70    | 1.12 g  | 26 |
| 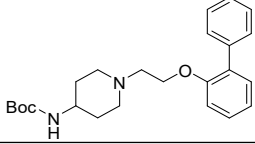   | Alkylating agent (1.2)<br>Amine (1)<br>K <sub>2</sub> CO <sub>3</sub> (3)                   | Acetone | 60 °C/48 h | Filtration<br>Concentration<br>Column chromatography<br>DCM/MeOH (9/0.7, v/v)                                    | 77    | 1.2 g   | 27 |
| 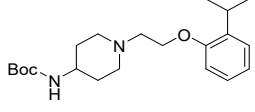   | Alkylating agent (1.2)<br>Amine (1)<br>K <sub>2</sub> CO <sub>3</sub> (3)                   | Acetone | 60 °C/48 h | Filtration<br>Concentration<br>Column chromatography<br>DCM/MeOH (9/0.7, v/v)                                    | 72    | 0.8 g   | 27 |
| 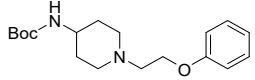   | Alkylating agent (1.2)<br>Amine (1)<br>K <sub>2</sub> CO <sub>3</sub> (3)                   | Acetone | 60 °C/24 h | Filtration<br>Concentration<br>Column chromatography<br>DCM/MeOH (9/0.7, v/v)                                    | 70    | 3.0 g   | 4  |
| 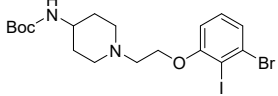   | Alkylating agent (1.2)<br>Amine (1)<br>K <sub>2</sub> CO <sub>3</sub> (3)                   | Acetone | 60 °C/24 h | Filtration<br>Concentration<br>Column chromatography<br>DCM/MeOH (9/0.7, v/v)                                    | 62    | 2.2 g   | 4  |
| arithmetic mean                                                                     |                                                                                             |         |            |                                                                                                                  | 74.70 |         |    |
| geometric mean                                                                      |                                                                                             |         |            |                                                                                                                  | 73.93 |         |    |
| median                                                                              |                                                                                             |         |            |                                                                                                                  | 72.50 |         |    |
| 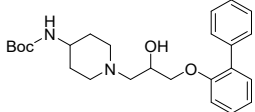 | Oxirane (1)<br>Amine (1.2)                                                                  | EtOH    | 80 °C/4 h  | Filtration<br>Concentration<br>Column chromatography<br>DCM/MeOH (9/1, v/v)                                      | 78    | 1.17 g  | 1  |
| 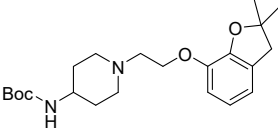 | Alkylating agent (1.2)<br>Amine (1)<br>K <sub>2</sub> CO <sub>3</sub> (3)<br>KI (catalytic) | Acetone | 70 °C/24 h | Filtration<br>Concentration<br>Column chromatography<br>DCM/MeOH (9/0.7, v/v)                                    | 70    | 1.366 g | 4  |

|                                                                                   |                                                                                             |         |            |                                                                               |    |         |   |
|-----------------------------------------------------------------------------------|---------------------------------------------------------------------------------------------|---------|------------|-------------------------------------------------------------------------------|----|---------|---|
| 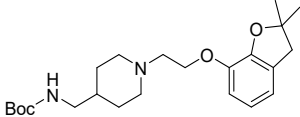 | Alkylating agent (1.2)<br>Amine (1)<br>K <sub>2</sub> CO <sub>3</sub> (3)<br>KI (catalytic) | Acetone | 70 °C/24 h | Filtration<br>Concentration<br>Column chromatography<br>DCM/MeOH (9/0.7, v/v) | 77 | 1.454 g | 4 |
|-----------------------------------------------------------------------------------|---------------------------------------------------------------------------------------------|---------|------------|-------------------------------------------------------------------------------|----|---------|---|

**Table 3-SI.** Literature review on reaction conditions for the aromatic nucleophilic substitution in solution.

| Product                                                                             | Reagents (equiv.)                                                                        | Solvent            | Temp./time  | Isolation procedure                                                                                                                | Yields | Scale  | Reference |
|-------------------------------------------------------------------------------------|------------------------------------------------------------------------------------------|--------------------|-------------|------------------------------------------------------------------------------------------------------------------------------------|--------|--------|-----------|
| 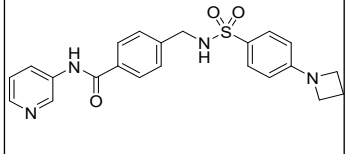   | Fluoro-derivative (1)<br>Secondary amine (7)<br>K <sub>2</sub> CO <sub>3</sub> (3)       | DMA                | 120 °C/20 h | Precipitation with H <sub>2</sub> O<br>Filtration<br>Crystallization (ACN)                                                         | 64     | 0.2 g  | 28        |
| 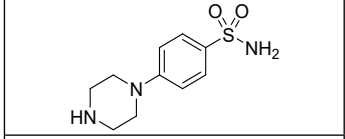   | Fluoro-derivative (1),<br>Secondary amine (4),                                           | H <sub>2</sub> O   | 100 °C/24 h | Filtration<br>Washing with H <sub>2</sub> O and toluene                                                                            | 94     | 32.3 g | 29        |
| 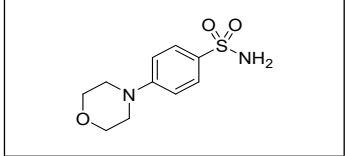   | Fluoro-derivative (1),<br>Secondary amine (36),                                          | -                  | 130 °C/72 h | Concentration<br>Precipitation with DCM<br>Filtration<br>Crystallization (EtOH)<br>Filtration                                      | 73     | 5.59 g | 30        |
| 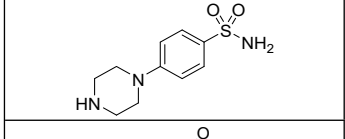   | Fluoro-derivative (1),<br>Secondary amine (4),                                           | H <sub>2</sub> O   | 100 °C/16 h | Filtration<br>Washing with H <sub>2</sub> O and toluene                                                                            | 90     | 5.54 g | 31        |
| 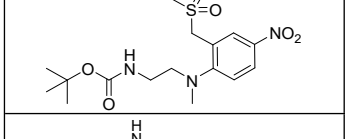  | Fluoro-derivative (1),<br>Secondary amine (1.2),<br>K <sub>2</sub> CO <sub>3</sub> (1.5) | DMF <sub>anh</sub> | 95 °C/16 h  | Dilution with H <sub>2</sub> O<br>Extraction with EtOAc<br>Washing with brine<br>Concentration                                     | 94     | 11.7 g | 32        |
| 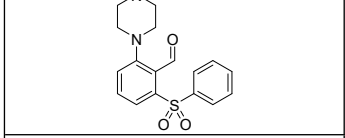 | Fluoro-derivative (1),<br>Secondary amine (2.5),<br>K <sub>2</sub> CO <sub>3</sub> (2)   | ACN                | 90 °C/16 h  | Partial solvent evaporation<br>Dilution with H <sub>2</sub> O<br>Extraction (DCM)<br>Column chromatography<br>DCM/MeOH (15/1, v/v) | 79     | 1.28 g | 33        |
| 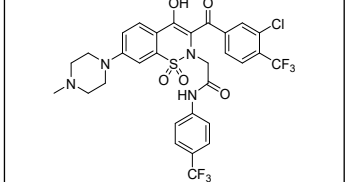 | Fluoro-derivative (1),<br>Secondary amine (5),<br>K <sub>2</sub> CO <sub>3</sub> (3)     | DMSO               | 80 °C/9 h   | Concentration<br>Preparative HPLC<br>H <sub>2</sub> O/CH <sub>3</sub> CN/CH <sub>3</sub> OH<br>(44/28/28 to 0/50/50, v/v)          | 41     | 47 mg  | 34        |

|                                                                                     |                                                                                          |      |             |                                                                                                                                                                                                                              |    |        |    |
|-------------------------------------------------------------------------------------|------------------------------------------------------------------------------------------|------|-------------|------------------------------------------------------------------------------------------------------------------------------------------------------------------------------------------------------------------------------|----|--------|----|
| 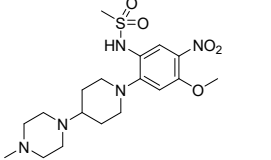   | Fluoro-derivative (1),<br>Secondary amine (1),<br>K <sub>2</sub> CO <sub>3</sub> (2)     | DMF  | 80 °C/16 h  | Extraction with H <sub>2</sub> O and DCM<br>Concentration<br>Crystallization (methyl tert-butyl ether)                                                                                                                       | 53 | 240 mg | 35 |
| 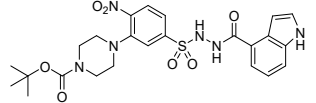   | Fluoro-derivative (1),<br>Secondary amine (1.5),<br>K <sub>2</sub> CO <sub>3</sub> (2)   | DMF  | rt/16 h     | Dilution (H <sub>2</sub> O)<br>Extraction (EtOAc)<br>Column chromatography                                                                                                                                                   | 44 | 1.2 g  | 36 |
| 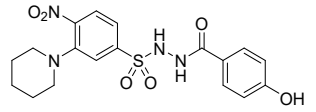   | Fluoro-derivative (1),<br>Secondary amine (1.2),<br>K <sub>2</sub> CO <sub>3</sub> (2.5) | MeOH | rt/16 h     | Dilution with H <sub>2</sub> O<br>Extraction (EtOAc)<br>Washing with brine<br>Concentration<br>Flash column chromatography DCM/MeOH (50/1, v/v)                                                                              | 51 | 240 mg | 36 |
| 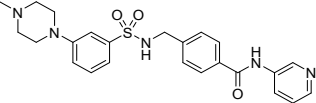   | Fluoro-derivative (1),<br>Secondary amine (62)                                           | DMSO | 130 °C/72 h | Concentration<br>Dilution (H <sub>2</sub> O)<br>Filtration<br>Washing with H <sub>2</sub> O<br>Column chromatography 5-10% of MeOH/DCM followed by 1% aqueous NH <sub>3</sub> /10% MeOH/DCM                                  | 33 | 45 mg  | 37 |
| 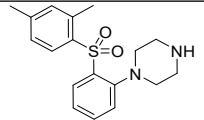  | Fluoro-derivative (1),<br>Secondary amine (5),<br>K <sub>2</sub> CO <sub>3</sub> (1.2)   | DMSO | 100 °C/16 h | Precipitation<br>Filtration<br>Washing with H <sub>2</sub> O                                                                                                                                                                 | 96 | 0.57 g | 38 |
| 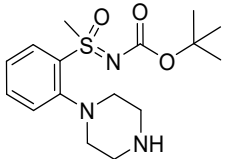 | Fluoro-derivative (1),<br>Secondary amine (4)                                            | Neat | 110 °C/18 h | Dissolution (H <sub>2</sub> O and EtOAc)<br>Extraction (EtOAc)<br>Washing with brine<br>Concentration<br>Flash column chromatography EtOAc in heptane (0% with gradient towards 100%), then MeOH in EtOAc, (0% with gradient | 68 | 4.5 g  | 39 |

|                                                                                     |                                                               |             |             |                                                                                                                             |       |         |               |
|-------------------------------------------------------------------------------------|---------------------------------------------------------------|-------------|-------------|-----------------------------------------------------------------------------------------------------------------------------|-------|---------|---------------|
|                                                                                     |                                                               |             |             | towards 100%)<br>Concentration<br>Dissolution (DCM)<br>Filtration<br>Concentration                                          |       |         |               |
| 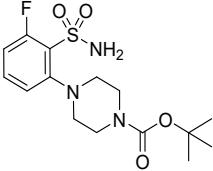   | Fluoro-derivative (1),<br>Secondary amine (1),<br>DIPEA (1.5) | 1,4-dioxane | 110 °C/3 h  | Concentration<br>Column chromatography 0-<br>45% MBTE in DCM                                                                | 39    | 796 mg  | 39            |
| 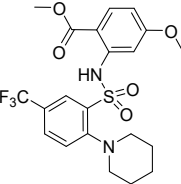   | Fluoro-derivative (1),<br>Secondary amine (3.5)               | THF         | 60 °C/144 h | Concentration<br>Column chromatography (0-<br>50% EtOAc/isohexanes)                                                         | 60    | 52 mg   | 40            |
| 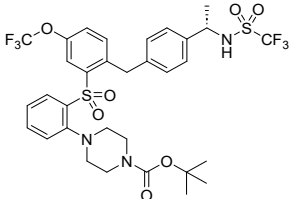   | Fluoro-derivative (1),<br>Secondary amine (8)                 | ACN         | 80 °C/88 h  | preparative TLC PTLC<br>EtOAc/hexane (1/1, v/v)                                                                             | 37    | 0.096 g | 41            |
| 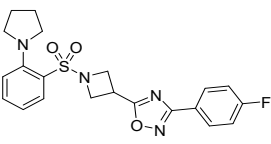  | Fluoro-derivative (1),<br>Secondary amine (54),<br>NaH (10)   | -           | 80 °C/16 h  | Concentration<br>Dissolution (H <sub>2</sub> O)<br>Extraction (DCM)<br>Washing with brine<br>Flash column<br>chromatography | 16    | 7 mg    | 42            |
| arithmetic mean                                                                     |                                                               |             |             |                                                                                                                             | 60.71 |         |               |
| geometric mean                                                                      |                                                               |             |             |                                                                                                                             | 55.33 |         |               |
| median                                                                              |                                                               |             |             |                                                                                                                             | 60.40 |         |               |
| 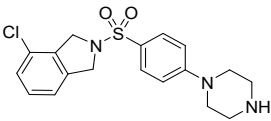 | Fluoro-derivative (1)<br>Secondary amine (6)                  | DMSO        | 90 °C/72 h  | Dilution (H <sub>2</sub> O)<br>Filtration<br>Washing (H <sub>2</sub> O)<br>Column chromatography<br>(DCM/MeOH (9/1, v/v)    | 48    | 68.9 mg | in-house data |

|                                                                                   |                                              |      |            |                                                                                                                         |    |         |               |
|-----------------------------------------------------------------------------------|----------------------------------------------|------|------------|-------------------------------------------------------------------------------------------------------------------------|----|---------|---------------|
| 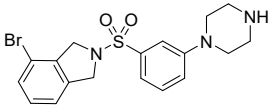 | Fluoro-derivative (1)<br>Secondary amine (6) | DMSO | 90 °C/72 h | Dilution (H <sub>2</sub> O)<br>Filtration<br>Washing (H <sub>2</sub> O)<br>Column chromatography<br>DCM/MeOH (9/1, v/v) | 84 | 33 mg   | in-house data |
| 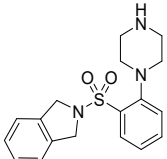 | Fluoro-derivative (1)<br>Secondary amine (6) | DMSO | 90 °C/72 h | Dilution (H <sub>2</sub> O)<br>Filtration<br>Washing (H <sub>2</sub> O)<br>Column chromatography<br>DCM/MeOH (9/1, v/v) | 66 | 98.6 mg | in-house data |

**Table 4-SI.** Literature review on reaction conditions for the sulfonylation of different primary and secondary amines in solution.

| Product                                                                             | Reagents (equiv.)                                              | Solvent            | Temp./time | Isolation procedure                                                                                                                        | Yields | Scale    | Reference |
|-------------------------------------------------------------------------------------|----------------------------------------------------------------|--------------------|------------|--------------------------------------------------------------------------------------------------------------------------------------------|--------|----------|-----------|
| 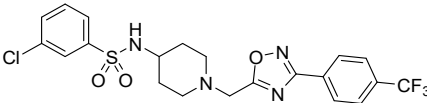   | Primary amine (1)<br>Arylsulfonyl chloride (1.1)<br>TEA (3)    | DCM <sub>anh</sub> | 25 °C/12 h | Washing with 10% citric acid solution and brine<br>Concentration<br>Crystallization                                                        | 66     | 83 mg    | 43        |
| 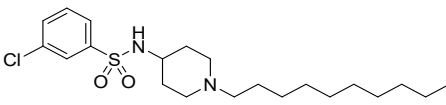   | Primary amine (1)<br>Arylsulfonyl chloride (1.1)<br>TEA (3)    | DCM                | 25 °C/48 h | Dissolution (DCM)<br>Washing with H <sub>2</sub> O<br>Concentration<br>Column chromatography<br>DCM/MeOH MeOH (100/1, v/v)                 | 31     | 186.7 mg | 44        |
| 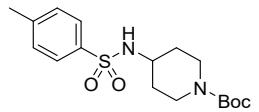   | Primary amine (1)<br>Arylsulfonyl chloride (1.1)<br>DIPEA (2)  | DCM <sub>anh</sub> | 25 °C/10 h | Quenching (H <sub>2</sub> O)<br>Extraction (DCM)<br>Washing with brine<br>Condensation<br>Column chromatography<br>hexane/EtOAc (4/1, v/v) | 88     | 468 mg   | 45        |
| 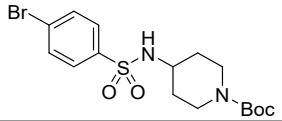   | Primary amine (1)<br>Arylsulfonyl chloride (1)<br>pyridine (3) | THF                | 25 °C/3 h  | Condensation<br>Flash column chromatography                                                                                                | 53     | 550 mg   | 46        |
| 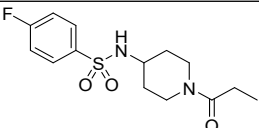  | Primary amine (1)<br>Arylsulfonyl chloride (1)<br>TEA (2)      | ACN                | -          | -                                                                                                                                          | 82     | -        | 47        |
| 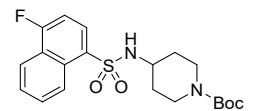 | Primary amine (1)<br>Arylsulfonyl chloride (1)<br>TEA (1)      | THF                | 25 °C/17 h | Concentration<br>Dissolution (DCM)<br>Washing H <sub>2</sub> O and brine<br>Concentration                                                  | 90     | 15 g     | 48        |
| 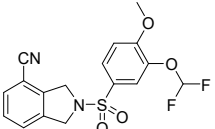 | Secondary amine (1)<br>Arylsulfonyl chloride (1)<br>TEA (1.5)  | DCM                | 25 °C/8 h  | Concentration<br>Column chromatography                                                                                                     | 69     | 1.3 g    | 49        |

|                                                                                     |                                                                                           |                         |            |                                                                                                                                                   |       |         |    |
|-------------------------------------------------------------------------------------|-------------------------------------------------------------------------------------------|-------------------------|------------|---------------------------------------------------------------------------------------------------------------------------------------------------|-------|---------|----|
| 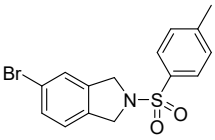   | Secondary amine (1)<br>Arylsulfonyl chloride (1.1)<br>DIPEA (3)<br>4-DMAP (0.3)           | THF/ACN<br>(2.5/1, v/v) | 25 °C/16 h | Concentration<br>Dissolution (H <sub>2</sub> O)<br>Extraction (EtOAc)<br>Washing with brine<br>Concentration<br>filtration with PE                | 94    | 700 mg  | 50 |
| 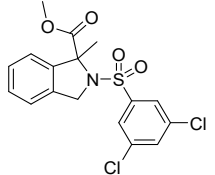   | Secondary amine (1)<br>Arylsulfonyl chloride (1)<br>DIPEA (3)<br>4-DMAP (0.1)             | DCM/THF<br>(1/1, v/v)   | 25 °C/16 h | Concentration<br>Flash column chromatography<br>hexane/EtOAc (20/1, v/v)                                                                          | 50    | 0.18 g  | 51 |
| 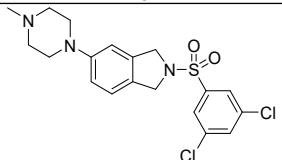   | Secondary amine (1)<br>Arylsulfonyl chloride (1)<br>TEA (1.8)                             | DCM                     | 25 °C/16 h | Condensation<br>Flash column chromatography<br>EtOAc/TEA/hexane<br>(60/1/39, v/v)                                                                 | 56    | 17 mg   | 52 |
| 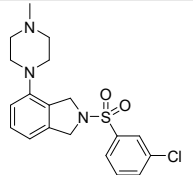   | Secondary amine (1)<br>Arylsulfonyl chloride (1.2)<br>TEA (3)                             | DCM                     | 0 °C/5 h   | Condensation<br>Preparative column chromatography<br>DCM/MeOH (9/0.5, v/v)                                                                        | 85    | 203 mg  | 53 |
| 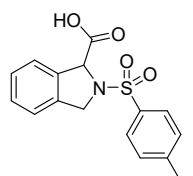  | Secondary amine (1)<br>Arylsulfonyl chloride (1.1)<br>Na <sub>2</sub> CO <sub>3</sub> (2) | H <sub>2</sub> O        | 25 °C/20 h | Dissolution (H <sub>2</sub> O)<br>Washing with EtOAc<br>Acidification (concentrated HCl)<br>Extraction (DCM)<br>Concentration<br>Preparative HPLC | 10    | 0.047 g | 54 |
| 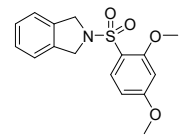 | Secondary amine (2)<br>Arylsulfonyl chloride (1)<br>TEA (2)                               | ACN                     | 25 °C/18 h | Dilution (EtOAc)<br>Washing with 1M aqueous HCl<br>solution, saturated NaHCO <sub>3</sub> solution<br>and brine<br>Concentration                  | -     | -       | 55 |
| arithmetic mean                                                                     |                                                                                           |                         |            |                                                                                                                                                   | 64.30 |         |    |
| geometric mean                                                                      |                                                                                           |                         |            |                                                                                                                                                   | 56.22 |         |    |
| median                                                                              |                                                                                           |                         |            |                                                                                                                                                   | 67.20 |         |    |

|                                                                                   |                                                               |     |          |                                                                |    |          |                                   |
|-----------------------------------------------------------------------------------|---------------------------------------------------------------|-----|----------|----------------------------------------------------------------|----|----------|-----------------------------------|
| 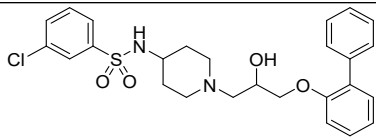 | Primary amine (1)<br>Arylsulfonyl chloride (1.2)<br>TEA (3)   | DCM | 0 °C/2 h | Concentration<br>Column chromatography<br>DCM/MeOH (9/0.5 v/v) | 72 | 330 mg   | In-house<br>protocol <sup>1</sup> |
| 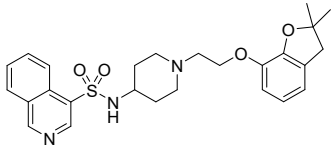 | Primary amine (1)<br>Arylsulfonyl chloride (1.2)<br>TEA (3)   | DCM | 0 °C/2 h | Concentration<br>Column chromatography<br>DCM/MeOH (9/0.5 v/v) | 73 | 242.1 mg | In-house<br>protocol <sup>4</sup> |
| 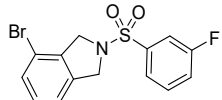 | Secondary amine (1)<br>Arylsulfonyl chloride (1.2)<br>TEA (3) | DCM | 0 °C/2 h | Concentration<br>Column chromatography<br>DCM/MeOH             | 62 | 280 mg   | In-house<br>data <sup>5</sup>     |

**Table 5-SI.** Literature review on reaction conditions for the *O*-alkylation in the synthesis of propranolol in solution.

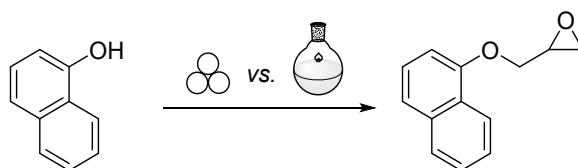

| Reagents (equiv.)                                                                                    | Solvent                             | Temp./time                     | Isolation procedure                                                                                                                                 | Yields | Scale    | Reference         |
|------------------------------------------------------------------------------------------------------|-------------------------------------|--------------------------------|-----------------------------------------------------------------------------------------------------------------------------------------------------|--------|----------|-------------------|
| Phenol (1)<br>Epichlorohydrine (2)<br>K <sub>2</sub> CO <sub>3</sub> (14)<br>NaOtBu (1.5)            |                                     | r.t./1 h 45 min                | Dissolution (EtOAc)<br>Washing with 2M NaOH aqueous solution and brine<br>Concentration                                                             | 86     | 181.9 mg | In-house protocol |
| Phenol (1)<br>Epichlorohydrine (3)<br>KOH (2)                                                        | EtOH/H <sub>2</sub> O<br>(9/1, v/v) | r.t./8.5 h                     | Dilution (H <sub>2</sub> O)<br>Extraction (CHCl <sub>3</sub> )<br>Washing with H <sub>2</sub> O and aqueous NaOH solution<br>Concentration          | 96     | 9.62 g   | <sup>6</sup>      |
| Phenol (1)<br>Epichlorohydrine (1.5)<br>K <sub>2</sub> CO <sub>3</sub> (4)<br>NaOH (1)<br>TBAB (0.1) | Solvent-free conditions             | MW irradiation<br>116 °C/2 min | Dissolution<br>Extraction (Et <sub>2</sub> O)<br>Washing with H <sub>2</sub> O<br>Concentration<br>Flash chromatography<br>hexane/EtOAc (10/1, v/v) | 96     | 3.84 g   | <sup>56</sup>     |
| Phenol (1)<br>Epichlorohydrine (2.5)<br>NaOH (1.6)<br>PEG 6000 (0.02)                                | H <sub>2</sub> O                    | 65 °C/5 h                      | Washing with H <sub>2</sub> O<br>Concentration                                                                                                      | 95     | 286.5 g  | <sup>57</sup>     |
| Phenol (1)<br>Epichlorohydrine (3)<br>TBAB (0.01)                                                    | ACN                                 | reflux/5 h                     | Dilution (H <sub>2</sub> O and NaOH aqueous solution)<br>Washing with H <sub>2</sub> O<br>Concentration                                             | 96     | -        | <sup>57</sup>     |
| Phenol (1)<br>Epichlorohydrine (3.2)<br>NaOH (1.1)                                                   | EtOH                                | MW irradiation<br>30 °C/12 min | Filtration<br>Extraction (Et <sub>2</sub> O)<br>Washing with NaOH aqueous                                                                           | 93     | 12.95 g  | <sup>58</sup>     |

|                                                                            |                           |              |                                                                                                                                                                                                                                                                                                                   |    |        |    |
|----------------------------------------------------------------------------|---------------------------|--------------|-------------------------------------------------------------------------------------------------------------------------------------------------------------------------------------------------------------------------------------------------------------------------------------------------------------------|----|--------|----|
| KI (0.04)                                                                  |                           |              | solution and H <sub>2</sub> O<br>Concentration                                                                                                                                                                                                                                                                    |    |        |    |
| Phenol<br>Epichlorohydrine<br>K <sub>2</sub> CO <sub>3</sub>               | Acetone                   | reflux/12 h  | -                                                                                                                                                                                                                                                                                                                 | 90 | -      | 59 |
| Phenol (1)<br>Epichlorohydrine (1.5)<br>K <sub>2</sub> CO <sub>3</sub> (2) | 2-butanone <sub>anh</sub> | reflux/12 h  | Filtration<br>Concentration<br>Column chromatography EtOAc/PE<br>(1/19, v/v)                                                                                                                                                                                                                                      | 90 | 6.3 g  | 60 |
| Phenol (1)<br>Epichlorohydrine (2)<br>KOH (1)                              | MeOH                      | 60 °C /0.5 h | Washing with brine<br>Extraction (DCM)<br>Concentration<br>Column chromatography<br>hexane/EtOAc (16/1, v/v)                                                                                                                                                                                                      | 88 | 0.88 g | 61 |
| Phenol (1)<br>Epichlorohydrine (1)<br>NaH (1.1, 60% in mineral oil)        | DMF <sub>anh</sub>        | 60 °C /16 h  | Quenching with aqueous saturated<br>NH <sub>4</sub> Cl solution<br>Concentration<br>Dispersion in H <sub>2</sub> O<br>Extraction (Et <sub>2</sub> O)<br>Washing with 1M aqueous NaOH<br>solution and brine<br>Concentration<br>Flash column chromatography<br>EtOAc/PE (40/60 to 30/70 over 10<br>column volumes) | 88 | 2.44 g | 62 |
| Phenol (1)<br>Epichlorohydrine (1.5)<br>K <sub>2</sub> CO <sub>3</sub> (2) | ACN                       | reflux/16 h  | Cooling<br>Filtration<br>Concentration<br>Column chromatography<br>(EtOAc/hexane (1/19, v/v)                                                                                                                                                                                                                      | 80 | 400 mg | 63 |
| Phenol (1)<br>Epichlorohydrine (3)<br>KOH (3)                              | DMSO                      | r.t./17 h    | Dilution (H <sub>2</sub> O)<br>Extraction (CHCl <sub>3</sub> )<br>Washing with 1 N aqueous NaOH<br>solution, H <sub>2</sub> O and brine<br>Condensation                                                                                                                                                           | 78 | 3.26 g | 64 |
| Phenol (1)                                                                 | H <sub>2</sub> O          | 60 °C        | Extraction (EtOAc)                                                                                                                                                                                                                                                                                                | 76 | 19.7 g | 65 |

|                                                                          |                    |               |                                                                                                                                                                                                             |    |         |    |
|--------------------------------------------------------------------------|--------------------|---------------|-------------------------------------------------------------------------------------------------------------------------------------------------------------------------------------------------------------|----|---------|----|
| Epichlorohydrine (3.2)<br>NaOH (2)                                       |                    |               | Washing with brine<br>Concentration<br>Flash chromatography EtOAc/PE<br>(1/10, v/v)                                                                                                                         |    |         |    |
| Phenol (1)<br>Epichlorohydrine (5)<br>NaH (1.5, 60% in mineral oil)      | DMF                | 25 °C /12 h   | Dilution (H <sub>2</sub> O)<br>Extraction (EtOAc)<br>Condensation<br>Column chromatography<br>Et <sub>2</sub> O/hexane (3/7, v/v)                                                                           | 76 | 1.08 g  | 66 |
| Phenol (1)<br>Epichlorohydrine (1.2)<br>CsF (3)                          | DMF <sub>anh</sub> | 50 °C /19.5 h | Dilution (H <sub>2</sub> O)<br>Precipitation<br>Extraction (EtOAc)<br>Concentration<br>Filtration through silica<br>(EtOAc/heptane (1/1, v/v))<br>Flash column chromatography<br>(EtOAc/heptane (1/9, v/v)) | 72 | 764 mg  | 66 |
| Phenol (1)<br>Epichlorohydrine (5)<br>NaH (1.5, 60% in mineral oil)      | DMF                | 25 °C /12 h   | Dilution (H <sub>2</sub> O)<br>Extraction (EtOAc)<br>Washing with brine<br>Condensation<br>Column chromatography<br>Et <sub>2</sub> O/hexane (3/7, v/v)                                                     | 71 | -       | 67 |
| Phenol (1)<br>Epichlorohydrine (1.3)<br>NaOH (1.3)                       | H <sub>2</sub> O   | reflux/6 h    | Extraction (Et <sub>2</sub> O)<br>Concentration<br>Flash chromatography<br>hexane/EtOAc (10/1, v/v))                                                                                                        | 69 | 26.25 g | 68 |
| Phenol (1)<br>Epichlorohydrine (2)<br>NaH (2)                            | DMF <sub>anh</sub> | 80 °C /5 h    | Dilution (H <sub>2</sub> O)<br>Extraction (Et <sub>2</sub> O)<br>Concentration<br>Flash chromatography<br>EtOAc/hexane (1/9, v/v)                                                                           | 61 | 1.69 g  | 69 |
| Phenol (1)<br>Epichlorohydrine (4)<br>K <sub>2</sub> CO <sub>3</sub> (2) | Acetone            | reflux/12 h   | Filtration<br>Concentration<br>Dissolution (toluene)<br>Washing with H <sub>2</sub> O and 1 N aqueous                                                                                                       | 61 | 12.2 g  | 70 |

|                                                    |                                                      |              |                                                                                                                                                                                                         |    |        |               |
|----------------------------------------------------|------------------------------------------------------|--------------|---------------------------------------------------------------------------------------------------------------------------------------------------------------------------------------------------------|----|--------|---------------|
|                                                    |                                                      |              | NaOH solution<br>Concentration<br>Column chromatography (CHCl <sub>3</sub> )                                                                                                                            |    |        |               |
| Phenol (1)<br>Epichlorohydrine (2.5)<br>NaOH (1.5) | H <sub>2</sub> O                                     | 85 °C /11 h  | Washing with H <sub>2</sub> O and brine<br>Distillation                                                                                                                                                 | 57 | 22.8 g | <sup>71</sup> |
| Phenol (1)<br>Epichlorohydrine (1.2)<br>NaH (1.3)  | DMF <sub>anh</sub> /THF <sub>anh</sub><br>(5/1, v/v) | 50 °C /16 h  | Dilution (H <sub>2</sub> O)<br>Precipitation<br>Extraction (EtOAc)<br>Concentration<br>Filtration through silica<br>EtOAc/heptane (1/1, v/v)<br>Flash column chromatography<br>EtOAc/heptane (1/9, v/v) | 50 | 4.0 g  | <sup>72</sup> |
| Phenol (1)<br>Epichlorohydrine (1.5)<br>NaOH (1.2) | H <sub>2</sub> O                                     | r.t./5 h     | Extraction (DCM)<br>Washing with 5% aqueous NaOH<br>solution and brine<br>Concentration<br>Column chromatography                                                                                        | 34 | 3.4 g  | <sup>73</sup> |
| Phenol (1)<br>Epichlorohydrine (1.1)<br>NaOH (1.2) | DMF/H <sub>2</sub> O<br>(2/1, v/v)                   | r.t./121.5 h | Extraction (DCM)<br>Washing with H <sub>2</sub> O<br>Concentration<br>column chromatography<br>hexane/EtOAc (9/1, v/v)                                                                                  | 11 | 467 mg | <sup>74</sup> |

**Table 6-SI.** Literature review on reaction conditions for the *N*-alkylation in the synthesis of propranolol

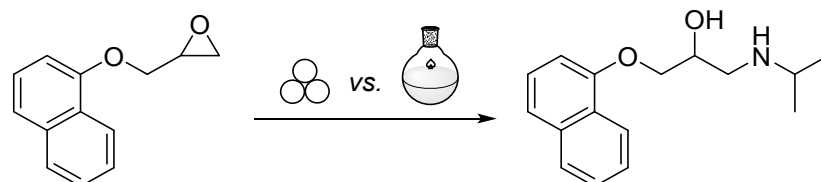

| Reagents (equiv.)                                                         | Solvent          | Temp./time    | Isolation procedure                                                                                                   | Yields | Scale    | Reference         |
|---------------------------------------------------------------------------|------------------|---------------|-----------------------------------------------------------------------------------------------------------------------|--------|----------|-------------------|
| Oxirane (1)<br>Isopropylamine (16)<br>NaCl<br>AcOH (0.1)                  |                  | r.t./4.5 h    | Dissolution (saturated solution of NaHCO <sub>3</sub> )<br>Extraction (EtOAc)<br>Washing with brine<br>Concentration  | 94     | 279.1 mg | in-house protocol |
| Oxirane (1)<br>Isopropylamine (1)                                         | H <sub>2</sub> O | reflux/3 h    | Concentration                                                                                                         | 100    | 78 mg    | 75                |
| Oxirane (1)<br>Isopropylamine (79)                                        | H <sub>2</sub> O | reflux/1 h    | Concentration                                                                                                         | 99     | 384 mg   | 76                |
| Oxirane (1)<br>Isopropylamine (5)<br>AcOH (0.1)<br>H <sub>2</sub> O (0.1) | -                | r.t./8 h      | Concentration                                                                                                         | 99     | 770 mg   | 77                |
| Oxirane (1)<br>Isopropylamine (2)<br>CaCl <sub>2</sub> (1)                | ACN              | r.t./8 h      | Dilution (H <sub>2</sub> O)<br>Extraction (Et <sub>2</sub> O)<br>Concentration<br>Crystallization (Et <sub>2</sub> O) | 93     | 0.24 g   | 69                |
| Oxirane (1)<br>Isopropylamine (4.24)                                      | MeOH             | 50 °C/12-24 h | Concentration<br>Column chromatography (EtOAc)                                                                        | 93     | 200.6 mg | 66                |
| Oxirane (1)<br>Isopropylamine (1.5)<br>DIPEA (0.4)                        | Toluene          | 35 °C/6 h     | Cooling<br>Precipitation<br>Filtration                                                                                | 93     | 192 g    | 57                |
| Montmorillonite K 10 (10% w/w)<br>Oxirane (1)<br>Isopropylamine (1)       | neat condition   | r.t./1.5 h    | Dilution (Et <sub>2</sub> O)<br>Filtration<br>Washing with Et <sub>2</sub> O                                          | 92     | 670 mg   | 78                |

|                                                                                                     |                         |             |                                                                                                                                                                              |    |          |    |
|-----------------------------------------------------------------------------------------------------|-------------------------|-------------|------------------------------------------------------------------------------------------------------------------------------------------------------------------------------|----|----------|----|
|                                                                                                     |                         |             | Concentration<br>Column chromatography<br>EtOAc/hexane (1/20, v/v)                                                                                                           |    |          |    |
| Oxirane (1)<br>Isopropylamine (1)<br>CeCl <sub>3</sub> ·7H <sub>2</sub> O (0.1)                     | Glycerine               | r.t./0.5 h  | Extraction (EtOAc)<br>Washing with H <sub>2</sub> O and brine<br>Concentration<br>Column chromatography<br>EtOAc/PE (3/7, v/v)                                               | 90 | 233.4 mg | 79 |
| Oxirane (1)<br>Isopropylamine (2)<br>nano Fe <sub>3</sub> O <sub>4</sub> (10 mol%)                  | neat<br>condition       | r.t./20 h   | Dilution (EtOAc)<br>Concentration<br>Column chromatography<br>EtOAc/hexane (2/8, v/v)                                                                                        | 85 | 220 mg   | 80 |
| Oxirane (1)<br>Isopropylamine (10)                                                                  | DCM                     | r.t./30 h   | Concentration<br>Dilution (H <sub>2</sub> O)<br>Extraction (EtOAc)<br>Washing with H <sub>2</sub> O and brine<br>Flash column chromatograph<br>EtOAc/PE (75/25, v/v)         | 83 | 0.535 mg | 81 |
| Oxirane (1)<br>Isopropylamine (11.2)                                                                | EtOH                    | reflux/3 h  | Concentration<br>Dissolution (DCM)<br>Extraction with 0.2 N HCl<br>Washing with DCM<br>Neutralization (1 N aqueous<br>NaOH solution)<br>Extraction with DCM<br>Concentration | 77 | 214 mg   | 82 |
| Oxirane (1)<br>Isopropylamine (1)<br>Zn(ClO <sub>4</sub> ) <sub>2</sub> ·7H <sub>2</sub> O (2 mol%) | neat<br>condition       | r.t./1 h    | Dilution (Et <sub>2</sub> O)<br>Washing with H <sub>2</sub> O<br>Concentration                                                                                               | 72 | 189 mg   | 83 |
| Oxirane (1)<br>Isopropylamine (1.6)<br>Silica gel                                                   | MW<br>neat<br>condition | -/0.5 h     | Extraction (Et <sub>2</sub> O)<br>Condensation<br>Dissolution (Et <sub>2</sub> O)<br>Precipitation with concentrated<br>HCl<br>Filtration                                    | 67 | 1.74 g   | 56 |
| Oxirane (1)                                                                                         | MeOH                    | 45 °C /48 h | Cooling to 5 °C                                                                                                                                                              | 54 | 0.74 g   |    |

|                      |  |  |                                                                                                                                     |  |  |   |
|----------------------|--|--|-------------------------------------------------------------------------------------------------------------------------------------|--|--|---|
| Isopropylamine (2.3) |  |  | Precipitation with HCl (2 M)<br>and NaOH (2 M)<br>Washing with H <sub>2</sub> O<br>Column chromatography<br>hexane/EtOAc (5/5, v/v) |  |  | 7 |
|----------------------|--|--|-------------------------------------------------------------------------------------------------------------------------------------|--|--|---|

**Table 7-SI.** Literature review on reaction conditions for the *N*-alkylation in the synthesis of brexpiprazole in solution.

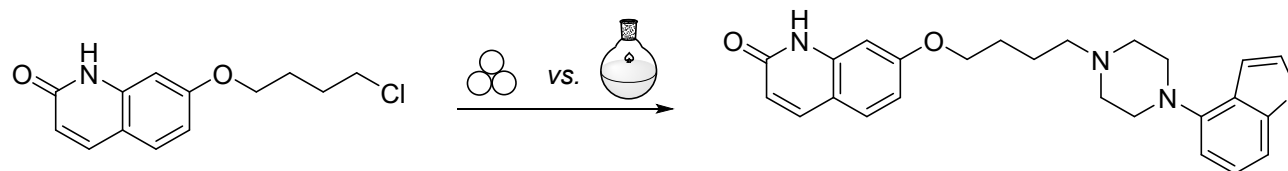

| Reagents (equiv.)                                                                                                                                      | Solvent                          | Temp./time   | Isolation procedure                                                                                                                                                                               | Yields | Scale    | Reference         |
|--------------------------------------------------------------------------------------------------------------------------------------------------------|----------------------------------|--------------|---------------------------------------------------------------------------------------------------------------------------------------------------------------------------------------------------|--------|----------|-------------------|
| 1-(benzo[b]thiophen-4-yl)piperazine hydrochloride (1)<br>7-(4-chlorobutoxy)quinolin-2(1H)-one (1)<br>K <sub>2</sub> CO <sub>3</sub> (15)<br>KI (0.1)   |                                  | r.t./1.5 h   | Washing with H <sub>2</sub> O<br>Dissolution EtOH/ H <sub>2</sub> O/AcOH (2/3/0.05, v/v/v)<br>Precipitation (5% NaOH solution)<br>Filtration                                                      | 94     | 389.6 mg | In-house protocol |
| 1-(benzo[b]thiophen-4-yl)piperazine hydrochloride (1.1)<br>7-(4-chlorobutoxy)quinolin-2(1H)-one (1)<br>Na <sub>2</sub> CO <sub>3</sub> (3)             | H <sub>2</sub> O/MeOH (2/1, v/v) | 70 °C/16.5 h | Cooling to 0°C<br>Filtration                                                                                                                                                                      | 96     | 20.7 g   | 84                |
| 1-(benzo[b]thiophen-4-yl)piperazine hydrochloride (1.1)<br>7-(4-chlorobutoxy)quinolin-2(1H)-one (1)<br>K <sub>2</sub> CO <sub>3</sub> (3)<br>NaI (1)   | DMF                              | 90 °C/3 h    | Dilution (H <sub>2</sub> O)<br>Filtration<br>Washing with H <sub>2</sub> O                                                                                                                        | 94     | 80.98 g  | 85                |
| 1-(benzo[b]thiophen-4-yl)piperazine hydrochloride (1.1)<br>7-(4-chlorobutoxy)quinolin-2(1H)-one (1)<br>K <sub>2</sub> CO <sub>3</sub> (3)<br>NaI (1.1) | DMF                              | 80 °C/2 h    | Precipitation with H <sub>2</sub> O<br>Filtration<br>Washing<br>Dissolution (DCM/MeOH)<br>Concentration<br>Column chromatography DCM/MeOH (100/3, v/v)<br>Concentration<br>Crystallization (EtOH) | 88     | 13.6 g   | 86                |
| 1-(benzo[b]thiophen-4-yl)piperazine hydrochloride (1)<br>7-(4-chlorobutoxy)quinolin-2(1H)-one (1)                                                      | DMF                              | 70 °C/10 h   | Dilution (H <sub>2</sub> O)<br>Filtration<br>Washing with H <sub>2</sub> O                                                                                                                        | 77     | 13.2 g   | 8                 |

|                                                                                                                                                            |                                     |            |                                                                                                                                                                                                                                                                                                                                                                                                                                                                            |    |          |    |
|------------------------------------------------------------------------------------------------------------------------------------------------------------|-------------------------------------|------------|----------------------------------------------------------------------------------------------------------------------------------------------------------------------------------------------------------------------------------------------------------------------------------------------------------------------------------------------------------------------------------------------------------------------------------------------------------------------------|----|----------|----|
| K <sub>2</sub> CO <sub>3</sub> (1.1)                                                                                                                       |                                     |            | Dissolution (DCM)<br>Filtration<br>Concentration<br>Dissolution (EtOAc)<br>Cooling<br>Precipitation<br>Filtration<br>Acid-base purification                                                                                                                                                                                                                                                                                                                                |    |          |    |
| 1-(benzo[b]thiophen-4-yl)piperazine<br>hydrochloride (1.1)<br>7-(4-chlorobutoxy)quinolin-2(1H)-one (1)<br>K <sub>2</sub> CO <sub>3</sub> (1.2)             | H <sub>2</sub> O/EtOH<br>(3/7, v/v) | reflux     | Cooling to 10°C<br>Filtration<br>Dissolution (DCM)<br>Washing with H <sub>2</sub> O<br>Concentration<br>Dissolution in DMSO/EtOH<br>(1/1, v/v)<br>Filtration                                                                                                                                                                                                                                                                                                               | 82 | 146.29 g | 87 |
| 1-(benzo[b]thiophen-4-yl)piperazine<br>hydrochloride (1.1)<br>7-(4-chlorobutoxy)quinolin-2(1H)-one (1)<br>K <sub>2</sub> CO <sub>3</sub> (1.1)<br>KI (1.1) | DMF                                 | 100 °C/2 h | Dilution (H <sub>2</sub> O)<br>Cooling to 10 °C<br>Precipitation<br>Filtration<br>Washing with H <sub>2</sub> O and EtOH<br>Dissolution in EtOH/AcOH<br>(13/1, v/v)<br>Acidification (concentrated HCl)<br>Precipitation<br>Cooling to 10 °C<br>Filtration<br>Washing with EtOH<br>Dissolution in EtOH/H <sub>2</sub> O<br>(1.5/1, v/v)<br>Filtration<br>Dissolution<br>Neutralization<br>(25% aqueous NaOH solution)<br>Precipitation with H <sub>2</sub> O<br>Filtration | 83 | 14.3 g   | 88 |

|                                                                                                                                            |     |           |                                                                                                                                                                                                                                                                                                                                                                                                               |    |       |    |
|--------------------------------------------------------------------------------------------------------------------------------------------|-----|-----------|---------------------------------------------------------------------------------------------------------------------------------------------------------------------------------------------------------------------------------------------------------------------------------------------------------------------------------------------------------------------------------------------------------------|----|-------|----|
|                                                                                                                                            |     |           | Washing with H <sub>2</sub> O                                                                                                                                                                                                                                                                                                                                                                                 |    |       |    |
| 1-(benzo[b]thiophen-4-yl)piperazine hydrochloride (1)<br>7-(4-chlorobutoxy)quinolin-2(1H)-one (1.1)<br>NaHCO <sub>3</sub><br>NaI (0.5)     | DMF | 95 °C/7 h | Cooling<br>Precipitation with H <sub>2</sub> O<br>Filtration<br>Washing                                                                                                                                                                                                                                                                                                                                       | 71 | 120 g | 86 |
| 1-(benzo[b]thiophen-4-yl)piperazine (1.2)<br>7-(4-chlorobutoxy)quinolin-2(1H)-one (1)<br>K <sub>2</sub> CO <sub>3</sub> (1.1)<br>NaI (1.1) | DMF | 90 °C/3 h | Cooling<br>Precipitation with H <sub>2</sub> O<br>Filtration<br>Washing with H <sub>2</sub> O and EtOH<br>Dissolution in EtOH/AcOH<br>(8/1, v/v)<br>Filtration<br>Washing with EtOH<br>Dissolution in EtOH/H <sub>2</sub> O<br>  (4/1, v/v)<br>Filtration<br>Neutralization<br>(5% aqueous NaHCO <sub>3</sub> solution)<br>Dilution (H <sub>2</sub> O)<br>Cooling<br>Filtration<br>Washing (H <sub>2</sub> O) | 67 | 23 g  | 89 |
| 1-(benzo[b]thiophen-4-yl)piperazine (1.2)<br>7-(4-chlorobutoxy)quinolin-2(1H)-one (1)<br>K <sub>2</sub> CO <sub>3</sub> (1.1)<br>NaI (1.1) | DMF | 95 °C/3 h | Cooling<br>Precipitation with H <sub>2</sub> O<br>Filtration<br>Washing with H <sub>2</sub> O and EtOH<br>Dissolution EtOH/AcOH<br>(13.33/1, v/v)<br>Acidification (concentrated HCl)<br>Precipitation<br>Cooling<br>Filtration<br>Washing with EtOH<br>Dissolution in EtOH/H <sub>2</sub> O (32/1 v/v)<br>Filtration                                                                                         | 64 | 110 g | 89 |

|                                                                                                                                                                          |                                     |             |                                                                                                                                                                                                        |    |        |    |
|--------------------------------------------------------------------------------------------------------------------------------------------------------------------------|-------------------------------------|-------------|--------------------------------------------------------------------------------------------------------------------------------------------------------------------------------------------------------|----|--------|----|
|                                                                                                                                                                          |                                     |             | Neutralization<br>(5% aqueous NaHCO <sub>3</sub> solution)<br>Dilution (H <sub>2</sub> O)<br>Cooling<br>Filtration<br>Washing (H <sub>2</sub> O)<br>Dissolution (EtOH)<br>Filtration<br>Washing (EtOH) |    |        |    |
| 7-hydroxy-2-quinolone (1.1)<br>1-bromo-4-chlorobutane (1.2)<br>1-(benzo[ <i>b</i> ]thiophen-4-yl)piperazine<br>hydrochloride (1)<br>K <sub>2</sub> CO <sub>3</sub> (2.5) | H <sub>2</sub> O/EtOH<br>(5/6, v/v) | reflux/11 h | Concentration<br>Cooling to 50 °C<br>Dissolution (EtOAc)<br>Cooling to 20 °C<br>Filtration<br>Washing with EtOH                                                                                        | 54 | 14.5 g | 90 |

**Table 8-SI.** Literature review on reaction conditions for the aromatic nucleophilic substitution in the synthesis of vortioxetine intermediate in solution.

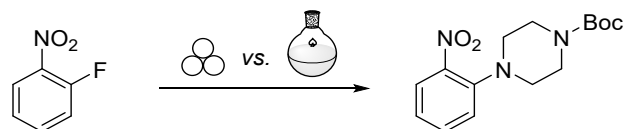

| Reagents (equiv.)                                                                | Solvent      | Temp./time | Isolation procedure                                                                                                                      | Yields | Scale    | Reference         |
|----------------------------------------------------------------------------------|--------------|------------|------------------------------------------------------------------------------------------------------------------------------------------|--------|----------|-------------------|
| 1-Fluoro-2-nitrobenzene (1)<br><i>N</i> -Boc-piperazine (3)<br>$K_2CO_3$ (2)     |              | r.t./3 h   | Dissolution (EtOAc)<br>Washing with $H_2O$<br>Concentration                                                                              | 95     | 149.5 mg | In-house protocol |
| 1-Fluoro-2-nitrobenzene (1)<br><i>N</i> -Boc-piperazine (1.1)<br>$K_2CO_3$ (1.2) | DMF          | 50 °C/17 h | Dilution ( $H_2O$ )<br>Extraction (toluene)<br>Concentration                                                                             | 99     | 21.7 g   | 91                |
| 1-Fluoro-2-nitrobenzene (1)<br><i>N</i> -Boc-piperazine (1)<br>DIPEA (1.2)       | DMF          | 80 °C/16 h | Dilution ( $H_2O$ )<br>Extraction (EtOAc)<br>Washing with brine<br>Concentration                                                         | 99     | 10.9 g   | 92                |
| 1-Fluoro-2-nitrobenzene (1)<br><i>N</i> -Boc-piperazine (2)<br>$K_2CO_3$ (2)     | DMSO         | 80 °C/12 h | Dilution ( $Et_2O$ )<br>Acidification (1 N HCl)<br>Extraction ( $Et_2O$ )                                                                | > 95   | -        | 93                |
| 1-Fluoro-2-nitrobenzene (1)<br><i>N</i> -Boc-piperazine (2)<br>$K_2CO_3$ (2)     | $DMSO_{anh}$ | 80 °C/72 h | Acidification (2 N HCl to a pH of 1)<br>Extraction ( $Et_2O$ )<br>Washing with $H_2O$ and brine<br>Concentration                         | 95     | 2.07 g   | 9                 |
| 1-Fluoro-2-nitrobenzene (1)<br><i>N</i> -Boc-piperazine (2)<br>$K_2CO_3$ (2)     | $DMSO_{anh}$ | 80 °C/72 h | Dilution ( $Et_2O$ )<br>Acidification (2 N HCl to a pH of 1)<br>Extraction ( $Et_2O$ )<br>Washing with $H_2O$ and brine<br>Concentration | 95     | 2.07 g   | 94                |
| 1-Fluoro-2-nitrobenzene (1)<br><i>N</i> -Boc-piperazine (1.1)<br>$Cs_2CO_3$ (2)  | DMF          | 80 °C/12 h | Concentration<br>Column chromatography hexane/EtOAc                                                                                      | 92     | 2 g      | 95                |
| 1-Fluoro-2-nitrobenzene (1)                                                      | ACN          | 80 °C/4 h  | Dilution ( $H_2O$ )                                                                                                                      | 87     | 0.72 g   |                   |

|                                                                                                   |     |            |                                                                                               |   |   |    |
|---------------------------------------------------------------------------------------------------|-----|------------|-----------------------------------------------------------------------------------------------|---|---|----|
| <i>N</i> -Boc-piperazine (1)<br>K <sub>2</sub> CO <sub>3</sub> (3)                                |     |            | Extraction (EtOAc)<br>Concentration<br>Flash column chromatography<br>(0-10% EtOAc in hexane) |   |   | 96 |
| 1-fluoro-2-nitrobenzene (1)<br><i>N</i> -Boc-piperazine (1)<br>K <sub>2</sub> CO <sub>3</sub> (4) | ACN | 80 °C/16 h | Filtration<br>Washing with ACN<br>Concentration                                               | - | - | 97 |

**Table 9-SI.** Literature review on reaction conditions for the sulfonylation in the synthesis of sulfasalazine intermediate in solution.

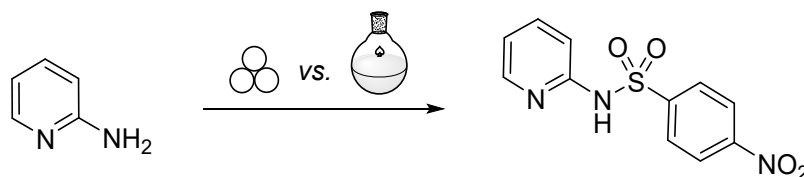

| Reagents (equiv.)                                                                          | Solvent                    | Temp./time   | Isolation procedure                                                                                                       | Yields | Scale    | Reference         |
|--------------------------------------------------------------------------------------------|----------------------------|--------------|---------------------------------------------------------------------------------------------------------------------------|--------|----------|-------------------|
| 2-aminopyrimidine (1)<br>arylsulfonyl chloride (1.3)<br>K <sub>2</sub> CO <sub>3</sub> (3) |                            | r.t./15 min  | Dissolution (5% aqueous HCl solution)<br>Filtration<br>Washing with H <sub>2</sub> O                                      | 86     | 241.1 mg | In-house protocol |
| 2-aminopyrimidine (1)<br>arylsulfonyl chloride (1.2)                                       | 1,4-dioxane <sub>anh</sub> | 95 °C/15 min | Precipitation with H <sub>2</sub> O<br>Filtration<br>Washing with H <sub>2</sub> O<br>Crystallization (80% 1,4-dioxane)   | 84     | 235.42 g | 98                |
| 2-aminopyrimidine (1)<br>arylsulfonyl chloride (1.2)                                       | pyridine                   | 25 °C/1 h    | Precipitation with H <sub>2</sub> O<br>Filtration                                                                         | 73     | 2.04 g   | 99                |
| 2-aminopyrimidine (1)<br>arylsulfonyl chloride (1)                                         | DCM                        | 25 °C/16 h   | Quenching with H <sub>2</sub> O<br>Washing with H <sub>2</sub> O and brine<br>Concentration<br>Crystallization (MeOH/DCM) | 65     | 0.41 g   | 100               |
| 2-aminopyrimidine (1)<br>arylsulfonyl chloride (1.5)                                       | pyridine                   | 0 °C/2 h     | Precipitation with H <sub>2</sub> O<br>Filtration<br>Crystallization (MeOH/DCM)                                           | 63     | 3.52 g   | 10                |
| 2-aminopyrimidine (1)<br>arylsulfonyl chloride (2.6)                                       | pyridine                   | 0 °C/24 h    | Filtration<br>Washing with H <sub>2</sub> O<br>Crystallization<br>EtOAc/toluene (1/3, v/v)                                | 61     | 7.7 g    | 101               |
| 2-aminopyrimidine (1)<br>arylsulfonyl chloride (1)                                         | pyridine                   | 80 °C/2 h    | Precipitation with H <sub>2</sub> O<br>Filtration<br>Washing with H <sub>2</sub> O                                        | 60     | 0.76 g   | 102               |
| 2-aminopyrimidine (1)<br>arylsulfonyl chloride (2.1)                                       | THF/DCM<br>(1/2, v/v)      | reflux/2 h   | Filtration<br>Dissolution                                                                                                 | 47     | 2.79 g   | 103               |

|           |  |  |                                                                                                                                                  |  |  |  |
|-----------|--|--|--------------------------------------------------------------------------------------------------------------------------------------------------|--|--|--|
| TEA (2.2) |  |  | MeOH and sodium methoxide (> 10 eq)<br>Concentration<br>Neutralization (HCl 1 N)<br>Precipitation<br>Filtration<br>Washing with H <sub>2</sub> O |  |  |  |
|-----------|--|--|--------------------------------------------------------------------------------------------------------------------------------------------------|--|--|--|

## 5. Additional data on the assessment with RGBsynt

**Table 10-SI.** Values of the parameters used in the assessment for all compared synthesis methods.

| Procedure                                        |          | R1: Yield (%) | R2: Purity (%) | G1/B1: E-factor | G2: ChlorTox (g) | B2: Time-efficiency (h) | G3/B3: Energy (EED) |
|--------------------------------------------------|----------|---------------|----------------|-----------------|------------------|-------------------------|---------------------|
| <b>O-alkylation - mechanochemistry (Mech. O)</b> |          |               |                |                 |                  |                         |                     |
| old                                              | Mech. O1 | 83            | 99             | 158.05          | 40.53            | 3.42                    | 46.21               |
| old                                              | Mech. O2 | 65            | 100            | 131.43          | 37.19            | 3.42                    | 46.21               |
| old                                              | Mech. O3 | 84            | 99             | 129.05          | 36.02            | 3.42                    | 46.21               |
| new                                              | Mech. O4 | 86            | 99             | 119.96          | 25.29            | 2.83                    | 42.06               |
| <b>Average</b>                                   |          | <b>79.5</b>   | <b>99.25</b>   | <b>134.63</b>   | <b>34.76</b>     | <b>3.27</b>             | <b>45.17</b>        |
| <b>O-alkylation - in-solution (Sol. O)</b>       |          |               |                |                 |                  |                         |                     |
| old                                              | Sol. O1  | 62            | 96             | 499.70          | 360.04           | 28.25                   | 138.19              |
| old                                              | Sol. O2  | 40            | 96             | 543.66          | 367.47           | 28.25                   | 138.19              |
| old                                              | Sol. O3  | 65            | 97             | 498.80          | 359.34           | 28.25                   | 132.88              |
| new                                              | Sol. O4  | 96            | 98             | 100.24          | 17.89            | 10.42                   | 83.93               |
| <b>Average</b>                                   |          | <b>65.75</b>  | <b>96.75</b>   | <b>410.60</b>   | <b>276.18</b>    | <b>23.79</b>            | <b>123.30</b>       |
| <b>N-alkylation - mechanochemistry (Mech. N)</b> |          |               |                |                 |                  |                         |                     |
| old                                              | Mech. N1 | 88            | 97             | 138.39          | 23.72            | 2.25                    | 37.50               |
| old                                              | Mech. N2 | 84            | 96             | 152.64          | 38.63            | 4.58                    | 53.50               |
| old                                              | Mech. N3 | 81            | 96             | 152.84          | 38.53            | 4.58                    | 53.50               |
| new                                              | Mech. N4 | 94            | 99             | 114.11          | 51.93            | 6.08                    | 61.64               |
| new                                              | Mech. N5 | 94            | 99             | 190.78          | 8.26             | 4.17                    | 34.71               |
| <b>Average</b>                                   |          | <b>88.2</b>   | <b>97.4</b>    | <b>149.75</b>   | <b>32.21</b>     | <b>4.33</b>             | <b>48.17</b>        |
| <b>N-alkylation - in-solution (Sol. N)</b>       |          |               |                |                 |                  |                         |                     |
| old                                              | Sol. N1  | 78            | 98             | 728.58          | 352.22           | 8.17                    | 74.32               |
| old                                              | Sol. N2  | 70            | 97             | 717.33          | 345.54           | 28.17                   | 138.00              |
| old                                              | Sol. N3  | 77            | 95             | 716.42          | 344.88           | 28.17                   | 138.00              |
| new                                              | Sol. N4  | 54            | 99             | 495.79          | 287.84           | 52.17                   | 187.79              |
| new                                              | Sol. N5  | 77            | 100            | 84.55           | 51.45            | 16.75                   | 106.41              |

| <b>Average</b>                                                            |             | <b>71.2</b>  | <b>97.8</b>  | <b>548.53</b> | <b>276.38</b> | <b>26.69</b> | <b>128.90</b> |
|---------------------------------------------------------------------------|-------------|--------------|--------------|---------------|---------------|--------------|---------------|
| <b>Nucleophilic aromatic substitution - mechanochemistry (Mech. SNAr)</b> |             |              |              |               |               |              |               |
| old                                                                       | Mech. SNAr1 | 81           | 100          | 47.47         | 6.25          | 4.17         | 34.71         |
| old                                                                       | Mech. SNAr2 | 88           | 100          | 46.79         | 5.73          | 4.17         | 34.71         |
| old                                                                       | Mech. SNAr3 | 84           | 100          | 47.49         | 6.27          | 4.17         | 34.71         |
| new                                                                       | Mech. SNAr4 | 95           | 97           | 193.18        | 37.46         | 4.08         | 50.50         |
| <b>Average</b>                                                            |             | <b>87</b>    | <b>99.25</b> | <b>83.73</b>  | <b>13.93</b>  | <b>4.15</b>  | <b>38.66</b>  |
| <b>Nucleophilic aromatic substitution - in-solution (Sol. SNAr)</b>       |             |              |              |               |               |              |               |
| old                                                                       | Sol. SNAr1  | 55           | 97           | 953.32        | 356.97        | 75.92        | 226.54        |
| old                                                                       | Sol. SNAr2  | 48           | 98           | 949.03        | 357.11        | 75.92        | 226.54        |
| old                                                                       | Sol. SNAr3  | 66           | 97           | 918.79        | 355.51        | 75.92        | 226.54        |
| new                                                                       | Sol. SNAr4  | 95           | 99           | 257.38        | 43.72         | 72.87        | 221.95        |
| <b>Average</b>                                                            |             | <b>66</b>    | <b>97.75</b> | <b>769.63</b> | <b>278.33</b> | <b>75.16</b> | <b>225.39</b> |
| <b>Sulfonylation - mechanochemistry (Mech. S)</b>                         |             |              |              |               |               |              |               |
| old                                                                       | Mech. S1    | 84           | 98           | 129.83        | 20.87         | 1.17         | 27.04         |
| old                                                                       | Mech. S2    | 76           | 99           | 112.37        | 13.93         | 1.17         | 27.04         |
| old                                                                       | Mech. S3    | 79           | 100          | 50.89         | 0.71          | 0.75         | 14.72         |
| new                                                                       | Mech. S4    | 86           | 100          | 104.39        | 2.50          | 1.33         | 19.61         |
| <b>Average</b>                                                            |             | <b>81.25</b> | <b>99.25</b> | <b>99.37</b>  | <b>9.50</b>   | <b>1.11</b>  | <b>22.10</b>  |
| <b>Sulfonylation - in-solution (Sol. S)</b>                               |             |              |              |               |               |              |               |
| old                                                                       | Sol. S1     | 80           | 98           | 715.86        | 343.20        | 6.08         | 61.64         |
| old                                                                       | Sol. S2     | 73           | 96           | 741.43        | 362.63        | 6.08         | 61.64         |
| old                                                                       | Sol. S3     | 62           | 99           | 739.36        | 360.99        | 6.08         | 61.64         |
| new                                                                       | Sol. S4     | 73           | 97           | 157.49        | 4.37          | 1.83         | 21.64         |
| <b>Average</b>                                                            |             | <b>72</b>    | <b>97.5</b>  | <b>588.54</b> | <b>267.80</b> | <b>5.02</b>  | <b>51.64</b>  |

## 6. Guidelines for the categorization of electrical instruments

The following classification of instruments is only a suggestion; depending on the circumstances and actual energy consumption parameters, it is recommended to develop own classifications. It is also possible to change the weight values (1,2,3,4), e.g. to ones that differ to a greater extent.

**Table 11-SI.** Energy-consumption categories of electrical instruments and examples of EED calculations

| Category*                                                   | Potential instruments**                                                                                                                                                                  | Example 1                                                             | Example 2                                                                | Example 3                                                                          |
|-------------------------------------------------------------|------------------------------------------------------------------------------------------------------------------------------------------------------------------------------------------|-----------------------------------------------------------------------|--------------------------------------------------------------------------|------------------------------------------------------------------------------------|
| <b>Low-power instruments, &lt;100 W (weight = 1)</b>        | pH-meter, balance, magnetic stirrer without heating, rotavapor, UV lamp, portable electrophoresis system, etc.                                                                           | 2 instruments (pH-meter and balance),<br>EED input: $2 \times 1 = 2$  | 2 instruments (pH-meter and balance),<br>EED input: $2 \times 1 = 2$     | 2 instruments (pH-meter and balance),<br>EED input: $2 \times 1 = 2$               |
| <b>Medium-power instruments, 100-250 W (weight = 2)</b>     | centrifuge, grinder, ball mill, heating bath, ultrasonic bath, vacuum pump, magnetic stirrer with heating, etc.                                                                          | 1 instrument (centrifuge),<br>EED input: $1 \times 2 = 2$             | 2 instruments (centrifuge and ball mill),<br>EED input: $2 \times 2 = 4$ | 3 instruments (centrifuge, ball mill, vacuum pump),<br>EED input: $3 \times 2 = 6$ |
| <b>High-power instruments, 250-1000 W (weight = 3)</b>      | fume hood, large centrifuge, chiller, freezer, chromatograph, spectrophotometer, fluorimeter, large-scale electrophoresis system, small-scale mass spectrometer, small-scale GC-MS, etc. | 2 instruments (fume hood and freezer),<br>EED input: $2 \times 3 = 6$ | 3 instruments (fume hood, freezer, HPLC),<br>EED input: $3 \times 3 = 9$ | 3 instruments (fume hood, freezer, HPLC),<br>EED input: $3 \times 3 = 9$           |
| <b>Very high-power instruments, &gt;1000 W (weight = 4)</b> | NMR spectrometer, large-scale mass spectrometer, liquid chromatographs and electrophoresis systems coupled to MS detector (HPLC-MS, CE-MS), etc.                                         |                                                                       |                                                                          | 1 instrument (NMR spectrometer),<br>EED input: $1 \times 4 = 4$                    |
| <b>Total EED input</b>                                      |                                                                                                                                                                                          | $2 + 2 + 6 = 10$                                                      | $2 + 4 + 9 = 15$                                                         | $2 + 6 + 9 + 4 = 21$                                                               |
| <b>Total procedure time</b>                                 |                                                                                                                                                                                          | 1 h                                                                   | 1 h                                                                      | 2 h                                                                                |
| <b>EED</b>                                                  |                                                                                                                                                                                          | $10 \times \sqrt{1} = 10$                                             | $15 \times \sqrt{1} = 15$                                                | $20 \times \sqrt{2} = 29.7$                                                        |

\* - assigned based on the approximated average electric power (W), the relationship between the weight assigned to the category and electric power is not linear to approximate the actual energy consumption - it was assumed that highly energy-intensive instruments (NMR, MS, etc.) are usually used for a shorter time than less energy-intensive ones that are the basic equipment (magnetic stirrer, heating bath, vacuum pump, etc.).

\*\* - based on the literature<sup>104</sup> and our best knowledge, computers included as the integral parts of the research instrumentations.

## 7. References

- 1 V. Canale, V. Frisi, X. Bantreil, F. Lamaty and P. Zajdel, *Journal of Organic Chemistry*, 2020, **85**, 10958–10965.
- 2 V. Canale, A. Partyka, R. Kurczab, M. Krawczyk, T. Kos, G. Satała, B. Kubica, M. Jastrzębska-Więsek, A. Wesołowska, A. J. Bojarski, P. Popik and P. Zajdel, *Bioorg Med Chem*, 2017, **25**, 2789–2799.
- 3 V. Canale, M. Kotańska, A. Dziubina, M. Stefaniak, A. Siwek, G. Starowicz, K. Marciniak, P. Kasza, G. Satała, B. Duszyńska, X. Bantreil, F. Lamaty, M. Bednarski, J. Sapa and P. Zajdel, *Molecules*, 2021, **26**, 3828.
- 4 R. Kurczab, V. Canale, G. Satała, P. Zajdel and A. J. Bojarski, *J. Med. Chem.*, 2018, **61**, 8717–8733.
- 5 V. Canale, W. Trybała, S. Chaumont-Dubel, P. Koczurkiewicz-Adamczyk, G. Satała, O. Bento, K. Blicharz-Futera, X. Bantreil, E. Pękala, A. J. Bojarski, F. Lamaty, P. Marin and P. Zajdel, *Biomolecules*, , 2023, **13**(1), 12.
- 6 A. Gharib, M. Jahangir, M. Roshani, N. N. Pesyan, J. W. Scheeren, S. Mohadesazadeh and S. Lagzian, *Synthesis and Reactivity in Inorganic, Metal-Organic and Nano-Metal Chemistry*, 2015, **45**, 350–355.
- 7 a) V. A. Tran, N. H. T. Tran, L. G. Bach, T. D. Nguyen, T. T. Nguyen, T. T. Nguyen, T. A. N. Nguyen, T. K. Vo, T. T. T. Vo and V. T. Le, *J. Chem.*, 2020, 1–10; b) [www.drugbank.ca](http://www.drugbank.ca). Retrieved 20<sup>th</sup> November 2024.
- 8 a) R. Tyagi, H. Singh, J. Singh, H. Arora, V. Yelmeli, M. Jain, S. Girigani and P. Kumar, *Org Process Res Dev*, 2018, **22**, 1471–1480.
- 9 T. Hermann, R. Wallner, J. Dolensky, W. Seebacher, E. M. Pferschy-Wenzig, M. Kaiser, P. Mäser and R. Weis, *Pharmaceuticals*, 2022, **15**(12), 1503.
- 10 M. Auxiliadora Dea-Ayuela, E. Castillo, M. Gonzalez-Alvarez, C. Vega, M. Rolón, F. Bolas-Fernández, J. Borrás and M. Eugenia González-Rosende, *Bioorg Med Chem*, 2009, **17**, 7449–7456.
- 11 KR101692343B1, 2017.
- 12 Y. Cai, M. Lian, Z. Li and Q. Meng, *Tetrahedron*, 2012, **68**, 7973–7977.
- 13 Y. F. Zhu, B. Le Wei, W. Q. Wang and L. J. Xuan, *Tetrahedron Lett*, 2019 **60**(50).
- 14 WO2010051374A1, 2010.
- 15 S. Wagner, K. Kopka, M. P. Law, B. Riemann, V. W. Pike, O. Schober and M. Schäfers, *Bioorg Med Chem*, 2004, **12**, 4117–4132.
- 16 K. Kopka, S. Wagner, B. Riemann, M. P. Law, C. Puke, S. K. Luthra, V. W. Pike, T. Wichter, W. Schmitz, O. Schober and M. Schäfers, *Bioorg Med Chem*, 2003, **11**, 3513–3527.
- 17 N. Korn, J. K. Gibson, F. J. Kniffen, B. R. Lucchesi, V. V. Ranade, M. Mimnaugh, T. Yu and R. E. Counsell, *Journal of Pharmaceutical Sciences*, 1980, **69**, 1010–1013.
- 18 US4663334A, 1987.
- 19 M. Nagarjuna Reddy and K. C. Kumara Swamy, *Org Biomol Chem*, 2013, **11**, 7350–7360.
- 20 WO2022204150A1, 2022.
- 21 US20170183308A1, 2017.

- 22 US20190177310A1, 2019.
- 23 WO2008128953A1, 2008.
- 24 US5082847A, 1992.
- 25 WO2021155321A2, 2021.
- 26 EP1939199A1, 2008.
- 27 V. Canale, R. Kurczab, A. Partyka, G. Satała, K. Słoczyńska, T. Kos, M. Jastrzębska-Więsek, A. Siwek, E. Pękala, A. J. Bojarski, A. Wesołowska, P. Popik and P. Zajdel, *Bioorg Med Chem*, 2016, **24**, 130–139.
- 28 X. Wang, M. Cal, M. Kaiser, F. S. Buckner, G. I. Lepesheva, A. G. Sanford, A. I. Wallick, P. H. Davis and J. L. Vennerstrom, *Bioorg Med Chem Lett*. 2020, **30**(1), 126778.
- 29 US20210346405A1, 2021.
- 30 US5565494A, 1996.
- 31 M. N. Peerzada, D. Vullo, N. Paoletti, A. Bonardi, P. Gratteri, C. T. Supuran and A. Azam, *ACS Med Chem Lett*, 2023, **14**, 810–819.
- 32 US20170369489A1, 2017.
- 33 CN110117264A, 2019.
- 34 Y. S. Shin, J. Y. Lee, S. Noh, Y. Kwak, S. Jeon, S. Kwon, Y. hee Jin, M. S. Jang, S. Kim, J. H. Song, H. R. Kim and C. M. Park, *Bioorg Med Chem Lett*, *Bioorg Med Chem Lett*. 2021, **31**, 127667.
- 35 KR20230054567A, 2023.
- 36 WO2023074936A1, 2023.
- 37 WO2011011514A1, 2011.
- 38 WO2014191548A1, 2014.
- 39 US20180127370A1, 2018.
- 40 WO2020104822A1, 2020.
- 41 US20030232859A1, 2003, 354.
- 42 A. M. Qunies, B. D. Spitznagel, Y. Du, C. David Weaver and K. A. Emmitte, *Bioorg Med Chem*, *Bioorg Med Chem*. 2023, **95**, 117487.
- 43 J. M. Decara, H. Vázquez-Villa, J. Brea, M. Alonso, R. K. Srivastava, L. Orio, F. Alén, J. Suárez, E. Baixeras, J. García-Cárceles, A. Escobar-Peña, B. Lutz, R. Rodríguez, E. Codesido, F. J. Garcia-Ladona, T. A. Bennett, J. A. Ballesteros, J. Cruces, M. I. Loza, B. Benhamú, F. Rodríguez De Fonseca and M. L. López-Rodríguez, *J Med Chem*, 2022, **65**, 5449–5461.
- 44 J. Xie, Z. Q. Long, A. Q. Chen, Y. G. Ding, S. T. Liu, X. Zhou, L. W. Liu and S. Yang, *Int. J. Mol. Sci*. 2023, **24**, 5861.
- 45 Y. Dai, J. Zheng and Q. Zhang, *Org Lett*, 2018, **20**, 3923–3927.
- 46 WO2022169755A1, 2022.
- 47 D. Manetti, E. Martini, C. Ghelardini, S. Dei, N. Galeotti, L. Guandalini, M. N. Romanelli, S. Scapecchi, E. Teodori, A. Bartolini and F. Gualtieri, *Bioorg Med Chem Lett*, 2003, **13**, 2303–2306.

- 48 T. J. Jenkins, B. Guan, M. Dai, G. Li, T. E. Lightburn, S. Huang, B. S. Freeze, D. F. Burdi, S. Jacutin-Porte, R. Bennett, W. Chen, C. Minor, S. Ghosh, C. Blackburn, K. M. Gigstad, M. Jones, R. Kolbeck, W. Yin, S. Smith, D. Cardillo, T. D. Ocain and G. C. Harriman, *J Med Chem*, 2007, **50**, 566–584.
- 49 CN111925313A, 2020.
- 50 EP3421465A1, 2019.
- 51 US20020193399A1, 2002.
- 52 WO2017190109A1, 2017.
- 53 WO2019097282A1, 2019.
- 54 US20020193399A1, 2002.
- 55 WO2015089360A1, 2015.
- 56 B. Pchelka and J. Pleniewicz, *Org Prep Proced Int*, 1998, **30**, 87–90.
- 57 CN111253267B, 2020.
- 58 EP2019090A1, 2009.
- 59 K. K. Kothakonda and D. S. Bose, *Chem Lett*, 2004, **33**, 1212–1213.
- 60 D. Subhas Bose, A. V. Narsimha Reddy and S. W. Chavhan, *Synthesis (Stuttg)*, 2005, 2345–2348.
- 61 US20120010315A1, 2012.
- 62 J. G. Baker, L. A. Adams, K. Salchow, S. N. Mistry, R. J. Middleton, S. J. Hill and B. Kellam, *J Med Chem*, 2011, **54**, 6874–6887.
- 63 Shivani, B. Pujala and A. K. Chakraborti, *Journal of Organic Chemistry*, 2007, **72**, 3713–3722.
- 64 US9250249B2, 2009.
- 65 X. D. Kong, H. L. Yu, S. Yang, J. Zhou, B. B. Zeng and J. H. Xu, *J Mol Catal B Enzym*, 2015, **122**, 275–281.
- 66 C. Tacon, E. M. Guantai, P. J. Smith and K. Chibale, *Bioorg Med Chem*, 2012, **20**, 893–902.
- 67 X. D. Kong, Q. Ma, J. Zhou, B. B. Zeng and J. H. Xu, *Angewandte Chemie - International Edition*, 2014, **53**, 6641–6644.
- 68 B. K. Pchelka, A. Loupy and A. Petit, *Tetrahedron*, 2006, **62**, 10968–10979.
- 69 A. M. Kawamoto and M. Wills, *J Chem Soc Perkin 1*, 2001, 1916–1928.
- 70 A. B. Samel and N. R. Pai, *J Chinese Chemical Soc*, 57: 1327–1330.
- 71 D. S. Shapenova, M. K. Belyatskii and L. P. Panicheva, *Russian Journal of Organic Chemistry*, 2010, **46**, 1017–1020.
- 72 A. Fagerström, M. Nilsson, U. Berg and R. Isaksson, *Org Biomol Chem*, 2006, **4**, 3067–3076.
- 73 J. Zhao, Y. Y. Chu, A. T. Li, X. Ju, X. D. Kong, J. Pan, Y. Tang and J. H. Xu, *Adv Synth Catal*, 2011, **353**, 1510–1518.
- 74 G. Faudone, I. Bischoff-Kont, L. Rachor, S. Willems, R. Zhubi, A. Kaiser, A. Chaikuad, S. Knapp, R. Fürst, J. Heering and D. Merk, *J Med Chem*, 2021, **64**, 8727–8738.
- 75 S. Miyano, L. D-L Lu, S. M. Viti and K. Barry Sharpless, *J. Org. Chem.* 1985, 50, 22, 4350–4360

- 76 I. A. Sayyed, V. V. Thakur, M. D. Nikalje, G. K. Dewkar, S. P. Kotkar and A. Sudalai, *Tetrahedron*, 2005, **61**, 2831–2838.
- 77 CN110885292A, 2022.
- 78 A. K. Chakraborti, A. Kondaskar and S. Rudrawar, *Tetrahedron*, 2004, **60**, 9085–9091.
- 79 A. V. Narsaiah, S. B. Wadavrao, A. R. Reddy and J. S. Yadav, *Synthesis (Stuttg)*, 2011, 485–489.
- 80 A. Kumar, R. Parella and S. A. Babu, *Synlett*, 2014, **25**, 835–842.
- 81 S. P. Panchgalle, R. G. Gore, S. P. Chavan and U. R. Kalkote, *Tetrahedron Asymmetry*, 2009, **20**, 1767–1770.
- 82 S. Iriuchijima and N. Kojima, *Agric Biol Chem*, 1982, **46**, 1153–1157.
- 83 Shivani, B. Pujala and A. K. Chakraborti, *Journal of Organic Chemistry*, 2007, **72**, 3713–3722.
- 84 CN105461703A, 2016.
- 85 US20170320862A1, 2023.
- 86 WO2006112464A1, 2006.
- 87 CN112745262A, 2022.
- 88 WO2013015456A1, 2013.
- 89 WO2017216661A1, 2017.
- 90 CN105061414B, 2015.
- 91 WO2015107057A1, 2015.
- 92 E. A. Meyer, P. Äänismaa, S. Froidevaux, M. Keller, L. Piali and E. Caroff, *J Med Chem*, 2022, **65**, 11513–11532.
- 93 L. Neuville and J. Zhu, *Solution Phase Combinatorial Synthesis of Arylpiperazines*, 1997, vol. 38.
- 94 T. Hermann, P. Hochegger, J. Dolensky, W. Seebacher, E. M. Pferschy-Wenzig, R. Saf, M. Kaiser, P. Mäser and R. Weis, *Pharmaceuticals* 2021, **14**, 1109.
- 95 AU2022397695A1, 2022.
- 96 WO2022240992A1, 2022.
- 97 WO2015169130A1, 2015.
- 98 US2245292A, 1941.
- 99 X. Lu, H. Xu, X. Zhang, T. Sun, Y. Lin, Y. Zhang, H. Li, X. Li, X. Yang, H. Duan and Y. Ling, *Molecules*, 2022, **27**(18), 6133.
- 100 G. Zhang, A. N. Plotnikov, E. Rusinova, T. Shen, K. Morohashi, J. Joshua, L. Zeng, S. Mujtaba, M. Ohlmeyer and M. M. Zhou, *J Med Chem*, 2013, **56**, 9251–9264.
- 101 J. L. Castrejon, S. N. Lavergne, A. El-Sheikh, J. Farrell, J. L. Maggs, S. Sabbani, P. M. O'Neill, B. Kevin Park and D. J. Naisbitt, *Chem Res Toxicol*, 2010, **23**, 184–192.
- 102 D. Patel, P. S. Kharkar, N. S. Gandhi, E. Kaur, S. Dutt and M. Nandave, *Drug Dev Res*, 2019, **80**, 758–777.
- 103 US20080227826A1, 2008.
